# Supplementary material for: Comparisons of fractionation methods for DNA and RNA viruses unearths a multifaceted relationship between viruses and soil moisture
Source: Research Square preprint supplement (doi:10.21203/rs.3.rs-7274549/v1), 2025-08-14
Supplement: Supplementary file 1 [file 34648c1b6b92ec4aa9cf6ca9.xlsx]

## Sheet: Overview
Sheet name	Description
MAG_taxonomy	Taxonomic identity of each MAG identified in bacterial DNA
MAG_checkM	Quality information of each MAG identified in bacterial DNA

## Sheet: MAG_taxonomy
user_genome	classification	fastani_reference	fastani_reference_radius	fastani_taxonomy	fastani_ani	fastani_af	closest_placement_reference	closest_placement_radius	closest_placement_taxonomy	closest_placement_ani	closest_placement_af	pplacer_taxonomy	classification_method	note	other_related_references(genome_id,species_name,radius,ANI,AF)	msa_percent	translation_table	red_value	warnings
SM1005_bin.1	d__Archaea;p__Thermoproteota;c__Nitrososphaeria;o__Nitrososphaerales;f__Nitrososphaeraceae;g__Nitrosocosmicus;s__	N/A	N/A	N/A	N/A	N/A	GCA_009379865.1	95	d__Archaea;p__Thermoproteota;c__Nitrososphaeria;o__Nitrososphaerales;f__Nitrososphaeraceae;g__Nitrosocosmicus;s__Nitrosocosmicus sp009379865	86.1	0.764	d__Archaea;p__Thermoproteota;c__Nitrososphaeria;o__Nitrososphaerales;f__Nitrososphaeraceae;g__Nitrosocosmicus;s__	taxonomic classification defined by topology and ANI	N/A	GCA_013694585.1, s__Nitrosocosmicus sp013694585, 95.0, 85.46, 0.644; GCF_000802205.1, s__Nitrosocosmicus oleophilus, 95.0, 85.24, 0.854; GCF_007826885.1, s__Nitrosocosmicus arcticus, 95.0, 84.77, 0.771; GCF_001870125.1, s__Nitrosocosmicus hydrocola, 95.0, 78.24, 0.314; GCA_013114705.1, s__Nitrosocosmicus sp013114705, 95.0, 77.99, 0.238; GCF_008389435.1, s__Nitrosocosmicus sp008389435, 95.0, 77.84…	70.62	11	0.99096	Genome not assigned to closest species as it falls outside its pre-defined ANI radius
SM1005_bin.55	d__Archaea;p__Thermoproteota;c__Nitrososphaeria;o__Nitrososphaerales;f__Nitrososphaeraceae;g__TH5896;s__TH5896 sp014523695	GCA_014523695.1	95	d__Archaea;p__Thermoproteota;c__Nitrososphaeria;o__Nitrososphaerales;f__Nitrososphaeraceae;g__TH5896;s__TH5896 sp014523695	97.81	0.654	N/A	N/A	N/A	N/A	N/A	N/A	ani_screen	classification based on ANI only	N/A	N/A	N/A	N/A	N/A
SM1030_bin.13	d__Archaea;p__Thermoproteota;c__Nitrososphaeria;o__Nitrososphaerales;f__Nitrososphaeraceae;g__TH5893;s__	N/A	N/A	N/A	N/A	N/A	GCA_014523685.1	95	d__Archaea;p__Thermoproteota;c__Nitrososphaeria;o__Nitrososphaerales;f__Nitrososphaeraceae;g__TH5893;s__TH5893 sp014523685	76.81	0.163	d__Archaea;p__Thermoproteota;c__Nitrososphaeria;o__Nitrososphaerales;f__Nitrososphaeraceae;g__;s__	taxonomic classification defined by topology and ANI	N/A	N/A	53.05	11	0.93306	N/A
SM1030_bin.14	d__Archaea;p__Thermoproteota;c__Nitrososphaeria;o__Nitrososphaerales;f__Nitrosopumilaceae;g__Nitrosotenuis;s__	N/A	N/A	N/A	N/A	N/A	N/A	N/A	N/A	N/A	N/A	d__Archaea;p__Thermoproteota;c__Nitrososphaeria;o__Nitrososphaerales;f__Nitrosopumilaceae;g__Nitrosotenuis;s__	taxonomic classification defined by topology and ANI	N/A	GCA_016215465.1, s__Nitrosotenuis sp016215465, 95.0, 87.87, 0.84; GCF_013407275.1, s__Nitrosotenuis sp013407275, 95.0, 87.54, 0.896; GCF_000685395.1, s__Nitrosotenuis chungbukensis, 95.0, 87.39, 0.879; GCA_023252015.1, s__Nitrosotenuis sp023252015, 95.0, 84.48, 0.604; GCA_016844685.1, s__Nitrosotenuis sp016844685, 95.0, 84.25, 0.648; GCA_004322465.1, s__Nitrosotenuis sp004322465, 95.0, 83.08, 0.7…	72.21	11	0.9909	Genome not assigned to closest species as it falls outside its pre-defined ANI radius
SM1030_bin.8	d__Archaea;p__Nanoarchaeota;c__Nanoarchaeia;o__Woesearchaeales;f__UBA10107;g__;s__	N/A	N/A	N/A	N/A	N/A	N/A	N/A	N/A	N/A	N/A	d__Archaea;p__Nanoarchaeota;c__Nanoarchaeia;o__Woesearchaeales;f__;g__;s__	taxonomic novelty determined using RED	N/A	N/A	87.16	11	0.85985	N/A
SM1000_bin.1	d__Bacteria;p__Patescibacteria;c__Doudnabacteria;o__UBA920;f__O2-02-FULL-48-8;g__;s__	N/A	N/A	N/A	N/A	N/A	GCA_019659055.1	95	d__Bacteria;p__Patescibacteria;c__Doudnabacteria;o__UBA920;f__O2-02-FULL-48-8;g__JAIFWV01;s__JAIFWV01 sp019659055	75.64	0.056	d__Bacteria;p__Patescibacteria;c__Doudnabacteria;o__UBA920;f__O2-02-FULL-48-8;g__;s__	taxonomic classification defined by topology and ANI	classification based on placement in class-level tree	N/A	53.05	11	0.78934	N/A
SM1000_bin.10	d__Bacteria;p__Pseudomonadota;c__Gammaproteobacteria;o__Burkholderiales;f__Burkholderiaceae_B;g__Ramlibacter;s__	N/A	N/A	N/A	N/A	N/A	GCF_013155545.1	95	d__Bacteria;p__Pseudomonadota;c__Gammaproteobacteria;o__Burkholderiales;f__Burkholderiaceae_B;g__Ramlibacter;s__Ramlibacter soli	88.59	0.808	d__Bacteria;p__Pseudomonadota;c__Gammaproteobacteria;o__Burkholderiales;f__Burkholderiaceae_B;g__Ramlibacter;s__	taxonomic classification defined by topology and ANI	classification based on placement in class-level tree	GCA_013815685.1, s__Ramlibacter sp013815685, 95.0, 83.47, 0.581; GCA_016191525.1, s__Ramlibacter sp016191525, 95.0, 82.46, 0.559; GCF_003797765.1, s__Ramlibacter sp003797765, 95.0, 82.42, 0.651; GCF_000215705.1, s__Ramlibacter tataouinensis, 95.0, 82.13, 0.558; GCA_002427815.1, s__Ramlibacter tataouinensis_A, 95.0, 81.94, 0.483; GCF_001424545.1, s__Ramlibacter sp001424545, 95.0, 81.92, 0.551; GCA…	69.77	11	0.99013	Genome not assigned to closest species as it falls outside its pre-defined ANI radius
SM1000_bin.11	d__Bacteria;p__Pseudomonadota;c__Alphaproteobacteria;o__Rhizobiales;f__Afifellaceae;g__Propylenella;s__	N/A	N/A	N/A	N/A	N/A	GCA_013812985.1	95	d__Bacteria;p__Pseudomonadota;c__Alphaproteobacteria;o__Rhizobiales;f__Afifellaceae;g__Propylenella;s__Propylenella sp013812985	78.25	0.315	d__Bacteria;p__Pseudomonadota;c__Alphaproteobacteria;o__Rhizobiales;f__Afifellaceae;g__Propylenella;s__	taxonomic classification defined by topology and ANI	classification based on placement in class-level tree	GCA_023417735.1, s__Propylenella sp023417735, 95.0, 77.99, 0.313; GCF_009866965.1, s__Propylenella binzhouense, 95.0, 77.98, 0.349; GCF_900110915.1, s__Propylenella sp900110915, 95.0, 77.18, 0.241	78.09	11	0.93865	N/A
SM1000_bin.12	d__Bacteria;p__Pseudomonadota;c__Gammaproteobacteria;o__Burkholderiales;f__Burkholderiaceae_B;g__Rhodoferax_C;s__	N/A	N/A	N/A	N/A	N/A	GCF_001955715.1	95	d__Bacteria;p__Pseudomonadota;c__Gammaproteobacteria;o__Burkholderiales;f__Burkholderiaceae_B;g__Rhodoferax_C;s__Rhodoferax_C saidenbachensis	88.75	0.901	d__Bacteria;p__Pseudomonadota;c__Gammaproteobacteria;o__Burkholderiales;f__Burkholderiaceae_B;g__Rhodoferax_C;s__	taxonomic classification defined by topology and ANI	classification based on placement in class-level tree	GCF_002943465.1, s__Rhodoferax_C sp002943465, 95.0, 82.72, 0.712; GCA_001795455.1, s__Rhodoferax_C sp001795455, 95.0, 82.2, 0.681; GCF_002251855.1, s__Rhodoferax_C sp002251855, 95.0, 81.37, 0.626; GCA_019449595.1, s__Rhodoferax_C sp019449595, 95.0, 80.66, 0.526; GCF_005876985.1, s__Rhodoferax_C bucti, 95.0, 80.51, 0.577; GCF_003415675.1, s__Rhodoferax_C lacus, 95.0, 80.44, 0.531; GCF_017798165.1,…	67.41	11	0.99349	Genome not assigned to closest species as it falls outside its pre-defined ANI radius
SM1000_bin.13	d__Bacteria;p__Pseudomonadota;c__Gammaproteobacteria;o__Pseudomonadales;f__Pseudomonadaceae;g__Pseudomonas_E;s__	N/A	N/A	N/A	N/A	N/A	N/A	N/A	N/A	N/A	N/A	d__Bacteria;p__Pseudomonadota;c__Gammaproteobacteria;o__Pseudomonadales;f__Pseudomonadaceae;g__Pseudomonas_E;s__	taxonomic classification defined by topology and ANI	classification based on placement in class-level tree	GCA_002840155.1, s__Pseudomonas_E sp002840155, 95.0, 84.87, 0.746; GCF_900105355.1, s__Pseudomonas_E anguilliseptica, 95.0, 84.2, 0.726; GCF_021375795.1, s__Pseudomonas_E anguilliseptica_A, 95.0, 84.02, 0.69; GCA_002354655.1, s__Pseudomonas_E sp002354655, 95.0, 83.98, 0.682; GCF_900099645.1, s__Pseudomonas_E peli, 95.0, 83.95, 0.695; GCF_009763245.1, s__Pseudomonas_E xionganensis, 95.0, 83.83, 0.…	48.18	11	0.97186	Genome not assigned to closest species as it falls outside its pre-defined ANI radius
SM1000_bin.15	d__Bacteria;p__Verrucomicrobiota;c__Verrucomicrobiae;o__Opitutales;f__Opitutaceae;g__ER46;s__	N/A	N/A	N/A	N/A	N/A	GCA_903848965.1	95	d__Bacteria;p__Verrucomicrobiota;c__Verrucomicrobiae;o__Opitutales;f__Opitutaceae;g__ER46;s__ER46 sp903848965	78.04	0.339	d__Bacteria;p__Verrucomicrobiota;c__Verrucomicrobiae;o__Opitutales;f__Opitutaceae;g__ER46;s__	taxonomic classification defined by topology and ANI	classification based on placement in class-level tree	GCA_016793535.1, s__ER46 sp016793535, 95.0, 77.88, 0.215; GCA_016794785.1, s__ER46 sp016794785, 95.0, 77.8, 0.239; GCA_002288455.1, s__ER46 sp002288455, 95.0, 77.74, 0.199; GCF_003054705.1, s__ER46 sp003054705, 95.0, 77.6, 0.203; GCA_016235555.1, s__ER46 sp016235555, 95.0, 77.58, 0.242; GCA_016209255.1, s__ER46 sp016209255, 95.0, 77.5, 0.164; GCA_016794665.1, s__ER46 sp016794665, 95.0, 77.45, 0.1…	42.76	11	0.95218	N/A
SM1000_bin.16	d__Bacteria;p__Verrucomicrobiota;c__Verrucomicrobiae;o__Verrucomicrobiales;f__Akkermansiaceae;g__Luteolibacter;s__	N/A	N/A	N/A	N/A	N/A	GCF_016595465.1	95	d__Bacteria;p__Verrucomicrobiota;c__Verrucomicrobiae;o__Verrucomicrobiales;f__Akkermansiaceae;g__Luteolibacter;s__Luteolibacter yonseiensis	81.87	0.66	d__Bacteria;p__Verrucomicrobiota;c__Verrucomicrobiae;o__Verrucomicrobiales;f__Akkermansiaceae;g__Luteolibacter;s__	taxonomic classification defined by topology and ANI	classification based on placement in class-level tree	GCA_945901795.1, s__Luteolibacter muciniphila_B, 95.0, 79.45, 0.322; GCA_945879075.1, s__Luteolibacter muciniphila_C, 95.0, 79.25, 0.415; GCA_020047775.1, s__Luteolibacter sp020047775, 95.0, 79.21, 0.234; GCA_913063525.1, s__Luteolibacter sp913063525, 95.0, 78.28, 0.244; GCA_003820635.1, s__Luteolibacter sp003820635, 95.0, 77.77, 0.195; GCA_945869465.1, s__Luteolibacter sp945869465, 95.0, 77.67, …	62.82	11	0.9828	Genome not assigned to closest species as it falls outside its pre-defined ANI radius
SM1000_bin.17	d__Bacteria;p__Bacteroidota;c__Bacteroidia;o__Chitinophagales;f__Chitinophagaceae;g__Sediminibacterium;s__	N/A	N/A	N/A	N/A	N/A	GCF_009939225.1	95	d__Bacteria;p__Bacteroidota;c__Bacteroidia;o__Chitinophagales;f__Chitinophagaceae;g__Sediminibacterium;s__Sediminibacterium soli	77.7	0.306	d__Bacteria;p__Bacteroidota;c__Bacteroidia;o__Chitinophagales;f__Chitinophagaceae;g__Sediminibacterium;s__	taxonomic classification defined by topology and ANI	classification based on placement in class-level tree	GCA_019247775.1, s__Sediminibacterium sp019247775, 95.0, 77.56, 0.272; GCA_016183765.1, s__Sediminibacterium sp016183765, 95.0, 77.27, 0.224; GCA_020403425.1, s__Sediminibacterium sp020403425, 95.0, 77.12, 0.197; GCA_004028765.1, s__Sediminibacterium sp004028765, 95.0, 76.98, 0.216; GCA_023256555.1, s__Sediminibacterium sp023256555, 95.0, 76.96, 0.025; GCF_009939005.1, s__Sediminibacterium roseum…	56.05	11	0.96934	N/A
SM1000_bin.18	d__Bacteria;p__Bacteroidota;c__Bacteroidia;o__Chitinophagales;f__Chitinophagaceae;g__Sediminibacterium;s__	N/A	N/A	N/A	N/A	N/A	N/A	N/A	N/A	N/A	N/A	d__Bacteria;p__Bacteroidota;c__Bacteroidia;o__Chitinophagales;f__Chitinophagaceae;g__Sediminibacterium;s__	ANI	classification based on placement in class-level tree	GCF_009939225.1, s__Sediminibacterium soli, 95.0, 77.97, 0.325; GCA_020403425.1, s__Sediminibacterium sp020403425, 95.0, 77.89, 0.244; GCA_019247775.1, s__Sediminibacterium sp019247775, 95.0, 77.68, 0.312; GCA_016183765.1, s__Sediminibacterium sp016183765, 95.0, 77.66, 0.282; GCF_900167075.1, s__Sediminibacterium ginsengisoli, 95.0, 77.56, 0.173; GCA_004297075.1, s__Sediminibacterium sp004297075,…	73.9	11	0.95761	N/A
SM1000_bin.19	d__Bacteria;p__Planctomycetota;c__Planctomycetia;o__Pirellulales;f__;g__;s__	N/A	N/A	N/A	N/A	N/A	GCA_009664345.1	95	d__Bacteria;p__Planctomycetota;c__Planctomycetia;o__Pirellulales;f__Pb10988;g__Pb10988;s__Pb10988 sp009664345	74.94	0.007	d__Bacteria;p__Planctomycetota;c__Planctomycetia;o__Pirellulales;f__;g__;s__	taxonomic classification defined by topology and ANI	classification based on placement in class-level tree	N/A	50.76	11	0.67232	N/A
SM1000_bin.2	d__Bacteria;p__Chloroflexota;c__Limnocylindria;o__P2-11E;f__P2-11E;g__CF-39;s__	N/A	N/A	N/A	N/A	N/A	N/A	N/A	N/A	N/A	N/A	d__Bacteria;p__Chloroflexota;c__Limnocylindria;o__P2-11E;f__P2-11E;g__CF-39;s__	taxonomic classification defined by topology and ANI	classification based on placement in class-level tree	GCA_005882255.1, s__CF-39 sp005882255, 95.0, 81.97, 0.601; GCA_005889405.1, s__CF-39 sp005889405, 95.0, 81.83, 0.667; GCA_005887995.1, s__CF-39 sp005887995, 95.0, 78.45, 0.427	48.42	11	0.9414	Genome not assigned to closest species as it falls outside its pre-defined ANI radius;Genome has more than 11.7% of markers with multiple hits
SM1000_bin.21	d__Bacteria;p__Pseudomonadota;c__Gammaproteobacteria;o__Pseudomonadales;f__Pseudohongiellaceae;g__CAILUG01;s__	N/A	N/A	N/A	N/A	N/A	GCA_945902215.1	95	d__Bacteria;p__Pseudomonadota;c__Gammaproteobacteria;o__Pseudomonadales;f__Pseudohongiellaceae;g__CAILUG01;s__CAILUG01 sp945902215	78.12	0.316	d__Bacteria;p__Pseudomonadota;c__Gammaproteobacteria;o__Pseudomonadales;f__Pseudohongiellaceae;g__CAILUG01;s__	taxonomic classification defined by topology and ANI	classification based on placement in class-level tree	GCA_903887045.1, s__CAILUG01 sp903887045, 95.0, 77.12, 0.213; GCA_903837345.1, s__CAILUG01 sp903837345, 95.0, 76.82, 0.149; GCA_903853385.1, s__CAILUG01 sp903853385, 95.0, 76.73, 0.112; GCA_903926285.1, s__CAILUG01 sp903926285, 95.0, 76.11, 0.092; GCA_903844415.1, s__CAILUG01 sp903844415, 95.0, 75.43, 0.03	50.31	11	0.95253	N/A
SM1000_bin.22	d__Bacteria;p__Patescibacteria;c__Paceibacteria;o__UBA9983_A;f__;g__;s__	N/A	N/A	N/A	N/A	N/A	N/A	N/A	N/A	N/A	N/A	d__Bacteria;p__Patescibacteria;c__Paceibacteria;o__UBA9983_A;f__;g__;s__	taxonomic novelty determined using RED	classification based on placement in class-level tree	N/A	61.85	11	0.7372	N/A
SM1000_bin.24	d__Bacteria;p__Verrucomicrobiota;c__Verrucomicrobiae;o__Verrucomicrobiales;f__Akkermansiaceae;g__Luteolibacter;s__	N/A	N/A	N/A	N/A	N/A	N/A	N/A	N/A	N/A	N/A	d__Bacteria;p__Verrucomicrobiota;c__Verrucomicrobiae;o__Verrucomicrobiales;f__Akkermansiaceae;g__Luteolibacter;s__	taxonomic classification defined by topology and ANI	classification based on placement in class-level tree	GCA_945879075.1, s__Luteolibacter muciniphila_C, 95.0, 81.77, 0.536; GCA_945901795.1, s__Luteolibacter muciniphila_B, 95.0, 81.6, 0.441; GCA_020047775.1, s__Luteolibacter sp020047775, 95.0, 81.14, 0.316; GCF_016595465.1, s__Luteolibacter yonseiensis, 95.0, 79.6, 0.407; GCA_913063525.1, s__Luteolibacter sp913063525, 95.0, 79.33, 0.328; GCA_003820635.1, s__Luteolibacter sp003820635, 95.0, 78.99, 0.…	70.51	11	0.96256	Genome not assigned to closest species as it falls outside its pre-defined ANI radius
SM1000_bin.25	d__Bacteria;p__Gemmatimonadota;c__Gemmatimonadetes;o__Longimicrobiales;f__UBA6960;g__UBA2982;s__	N/A	N/A	N/A	N/A	N/A	N/A	N/A	N/A	N/A	N/A	d__Bacteria;p__Gemmatimonadota;c__Gemmatimonadetes;o__Longimicrobiales;f__UBA6960;g__UBA2982;s__	ANI	classification based on placement in class-level tree	GCA_016873995.1, s__UBA2982 sp016873995, 95.0, 79.56, 0.436; GCA_009692205.1, s__UBA2982 sp009692205, 95.0, 79.25, 0.486; GCA_024638325.1, s__UBA2982 sp024638325, 95.0, 77.8, 0.238; GCA_002347035.1, s__UBA2982 sp002347035, 95.0, 75.35, 0.025	68.64	11	0.93202	N/A
SM1000_bin.26	d__Bacteria;p__Pseudomonadota;c__Alphaproteobacteria;o__Rhizobiales;f__Rhizobiaceae;g__Pararhizobium;s__	N/A	N/A	N/A	N/A	N/A	GCA_024426085.1	95	d__Bacteria;p__Pseudomonadota;c__Alphaproteobacteria;o__Rhizobiales;f__Rhizobiaceae;g__Pararhizobium;s__Pararhizobium sp024426085	94.38	0.931	d__Bacteria;p__Pseudomonadota;c__Alphaproteobacteria;o__Rhizobiales;f__Rhizobiaceae;g__Pararhizobium;s__	taxonomic classification defined by topology and ANI	classification based on placement in class-level tree	GCA_900473045.1, s__Pararhizobium sp900473045, 95.0, 87.94, 0.877; GCA_900468065.1, s__Pararhizobium sp900468065, 95.0, 87.94, 0.862; GCA_900473685.1, s__Pararhizobium sp900473685, 95.0, 87.67, 0.857; GCA_900472175.1, s__Pararhizobium sp900472175, 95.0, 87.33, 0.851; GCF_001426665.1, s__Pararhizobium sp001426665, 95.0, 87.01, 0.866; GCF_001426685.1, s__Pararhizobium sp001426685, 95.0, 86.81, 0.83…	58.01	11	0.99605	Genome not assigned to closest species as it falls outside its pre-defined ANI radius
SM1000_bin.27	d__Bacteria;p__Verrucomicrobiota;c__Verrucomicrobiae;o__Opitutales;f__Opitutaceae;g__Lacunisphaera;s__	N/A	N/A	N/A	N/A	N/A	GCF_004118375.1	95	d__Bacteria;p__Verrucomicrobiota;c__Verrucomicrobiae;o__Opitutales;f__Opitutaceae;g__Lacunisphaera;s__Lacunisphaera lenta	79.81	0.363	d__Bacteria;p__Verrucomicrobiota;c__Verrucomicrobiae;o__Opitutales;f__Opitutaceae;g__Lacunisphaera;s__	taxonomic classification defined by topology and ANI	classification based on placement in class-level tree	GCF_001746835.1, s__Lacunisphaera limnophila, 95.0, 79.97, 0.348; GCA_016795565.1, s__Lacunisphaera sp016795565, 95.0, 79.63, 0.319; GCF_900104925.1, s__Lacunisphaera sp900104925, 95.0, 79.41, 0.317; GCA_016190985.1, s__Lacunisphaera sp016190985, 95.0, 79.29, 0.389; GCA_023269445.1, s__Lacunisphaera sp023269445, 95.0, 79.13, 0.411; GCA_023433275.1, s__Lacunisphaera sp023433275, 95.0, 78.91, 0.317…	49.93	11	0.96166	N/A
SM1000_bin.28	d__Bacteria;p__Gemmatimonadota;c__Gemmatimonadetes;o__Gemmatimonadales;f__GWC2-71-9;g__;s__	N/A	N/A	N/A	N/A	N/A	N/A	N/A	N/A	N/A	N/A	d__Bacteria;p__Gemmatimonadota;c__Gemmatimonadetes;o__Gemmatimonadales;f__GWC2-71-9;g__;s__	taxonomic novelty determined using RED	classification based on placement in class-level tree	N/A	80.85	11	0.84625	N/A
SM1000_bin.3	d__Bacteria;p__Gemmatimonadota;c__Gemmatimonadetes;o__Gemmatimonadales;f__Gemmatimonadaceae;g__;s__	N/A	N/A	N/A	N/A	N/A	N/A	N/A	N/A	N/A	N/A	d__Bacteria;p__Gemmatimonadota;c__Gemmatimonadetes;o__Gemmatimonadales;f__Gemmatimonadaceae;g__;s__	taxonomic novelty determined using RED	classification based on placement in class-level tree	N/A	60.54	11	0.88629	N/A
SM1000_bin.30	d__Bacteria;p__Pseudomonadota;c__Gammaproteobacteria;o__Legionellales;f__Legionellaceae;g__UBA11403;s__	N/A	N/A	N/A	N/A	N/A	GCA_002423125.1	95	d__Bacteria;p__Pseudomonadota;c__Gammaproteobacteria;o__Legionellales;f__Legionellaceae;g__UBA11403;s__UBA11403 sp002423125	76.72	0.105	d__Bacteria;p__Pseudomonadota;c__Gammaproteobacteria;o__Legionellales;f__Legionellaceae;g__UBA11403;s__	taxonomic classification defined by topology and ANI	classification based on placement in class-level tree	N/A	98.43	11	0.95635	N/A
SM1000_bin.31	d__Bacteria;p__Dependentiae;c__Babeliae;o__Babeliales;f__UBA12411;g__;s__	N/A	N/A	N/A	N/A	N/A	N/A	N/A	N/A	N/A	N/A	d__Bacteria;p__Dependentiae;c__Babeliae;o__Babeliales;f__UBA12411;g__;s__	taxonomic novelty determined using RED	classification based on placement in class-level tree	N/A	80.5	11	0.74803	N/A
SM1000_bin.32	d__Bacteria;p__Acidobacteriota;c__Vicinamibacteria;o__Fen-336;f__Fen-336;g__;s__	N/A	N/A	N/A	N/A	N/A	N/A	N/A	N/A	N/A	N/A	d__Bacteria;p__Acidobacteriota;c__Vicinamibacteria;o__Fen-336;f__Fen-336;g__;s__	taxonomic classification fully defined by topology	classification based on placement in class-level tree	N/A	88	11	0.80504	N/A
SM1000_bin.34	d__Bacteria;p__Dependentiae;c__Babeliae;o__Babeliales;f__Vermiphilaceae;g__;s__	N/A	N/A	N/A	N/A	N/A	GCA_018266085.1	95	d__Bacteria;p__Dependentiae;c__Babeliae;o__Babeliales;f__Vermiphilaceae;g__JAFEAZ01;s__JAFEAZ01 sp018266085	75.59	0.038	d__Bacteria;p__Dependentiae;c__Babeliae;o__Babeliales;f__Vermiphilaceae;g__;s__	taxonomic classification defined by topology and ANI	classification based on placement in class-level tree	N/A	44.65	11	0.81515	N/A
SM1000_bin.35	d__Bacteria;p__Pseudomonadota;c__Gammaproteobacteria;o__Steroidobacterales;f__Steroidobacteraceae;g__ZC4RG30;s__	N/A	N/A	N/A	N/A	N/A	GCA_015655465.1	95	d__Bacteria;p__Pseudomonadota;c__Gammaproteobacteria;o__Steroidobacterales;f__Steroidobacteraceae;g__ZC4RG30;s__ZC4RG30 sp015655465	80.44	0.458	d__Bacteria;p__Pseudomonadota;c__Gammaproteobacteria;o__Steroidobacterales;f__Steroidobacteraceae;g__ZC4RG30;s__	taxonomic classification defined by topology and ANI	classification based on placement in class-level tree	GCA_016720075.1, s__ZC4RG30 sp016720075, 95.0, 79.85, 0.42; GCA_003242275.1, s__ZC4RG30 sp003242275, 95.0, 79.09, 0.404; GCA_903868595.1, s__ZC4RG30 sp903868595, 95.0, 78.01, 0.244; GCA_903908825.1, s__ZC4RG30 sp903908825, 95.0, 76.97, 0.181	72.75	11	0.96889	N/A
SM1000_bin.36	d__Bacteria;p__Verrucomicrobiota;c__Verrucomicrobiae;o__Opitutales;f__Opitutaceae;g__CAIYUN01;s__	N/A	N/A	N/A	N/A	N/A	GCA_903869665.1	95	d__Bacteria;p__Verrucomicrobiota;c__Verrucomicrobiae;o__Opitutales;f__Opitutaceae;g__CAIYUN01;s__CAIYUN01 sp903869665	83.31	0.609	d__Bacteria;p__Verrucomicrobiota;c__Verrucomicrobiae;o__Opitutales;f__Opitutaceae;g__CAIYUN01;s__	taxonomic classification defined by topology and ANI	classification based on placement in class-level tree	GCA_903869955.1, s__CAIYUN01 sp903869955, 95.0, 79.8, 0.466; GCA_903872425.1, s__CAIYUN01 sp903872425, 95.0, 79.11, 0.386; GCA_903929355.1, s__CAIYUN01 sp903929355, 95.0, 78.29, 0.41; GCA_903919625.1, s__CAIYUN01 sp903919625, 95.0, 77.63, 0.274	61.03	11	0.97861	Genome not assigned to closest species as it falls outside its pre-defined ANI radius
SM1000_bin.38	d__Bacteria;p__Acidobacteriota;c__Vicinamibacteria;o__Vicinamibacterales;f__UBA2999;g__JAMQPK01;s__	N/A	N/A	N/A	N/A	N/A	GCA_023717525.1	95	d__Bacteria;p__Acidobacteriota;c__Vicinamibacteria;o__Vicinamibacterales;f__UBA2999;g__JAMQPK01;s__JAMQPK01 sp023717525	77.73	0.225	d__Bacteria;p__Acidobacteriota;c__Vicinamibacteria;o__Vicinamibacterales;f__UBA2999;g__JAMQPK01;s__	taxonomic classification defined by topology and ANI	classification based on placement in class-level tree	N/A	54.64	11	0.89902	N/A
SM1000_bin.39	d__Bacteria;p__Bacteroidota;c__Kapabacteria;o__Palsa-1295;f__Palsa-1295;g__JAFDZW01;s__	N/A	N/A	N/A	N/A	N/A	GCA_018266755.1	95	d__Bacteria;p__Bacteroidota;c__Kapabacteria;o__Palsa-1295;f__Palsa-1295;g__JAFDZW01;s__JAFDZW01 sp018266755	76.93	0.045	d__Bacteria;p__Bacteroidota;c__Kapabacteria;o__Palsa-1295;f__Palsa-1295;g__JAFDZW01;s__	taxonomic classification defined by topology and ANI	classification based on placement in class-level tree	N/A	96.54	11	0.84322	N/A
SM1000_bin.4	d__Bacteria;p__Patescibacteria;c__Microgenomatia;o__UBA1400;f__PJMF01;g__BOKX01;s__	N/A	N/A	N/A	N/A	N/A	GCA_016861205.1	95	d__Bacteria;p__Patescibacteria;c__Microgenomatia;o__UBA1400;f__PJMF01;g__BOKX01;s__BOKX01 sp016861205	77.08	0.041	d__Bacteria;p__Patescibacteria;c__Microgenomatia;o__UBA1400;f__PJMF01;g__BOKX01;s__	taxonomic classification defined by topology and ANI	classification based on placement in class-level tree	N/A	58.21	11	0.85674	N/A
SM1000_bin.40	d__Bacteria;p__Gemmatimonadota;c__Gemmatimonadetes;o__Gemmatimonadales;f__GWC2-71-9;g__;s__	N/A	N/A	N/A	N/A	N/A	N/A	N/A	N/A	N/A	N/A	d__Bacteria;p__Gemmatimonadota;c__Gemmatimonadetes;o__Gemmatimonadales;f__GWC2-71-9;g__;s__	taxonomic novelty determined using RED	classification based on placement in class-level tree	N/A	71.08	11	0.84402	N/A
SM1000_bin.42	d__Bacteria;p__Acidobacteriota;c__Vicinamibacteria;o__Vicinamibacterales;f__UBA2999;g__12-FULL-67-14b;s__	N/A	N/A	N/A	N/A	N/A	N/A	N/A	N/A	N/A	N/A	d__Bacteria;p__Acidobacteriota;c__Vicinamibacteria;o__Vicinamibacterales;f__UBA2999;g__12-FULL-67-14b;s__	taxonomic classification defined by topology and ANI	classification based on placement in class-level tree	GCA_019752015.1, s__12-FULL-67-14b sp019752015, 95.0, 81.47, 0.522; GCA_016871275.1, s__12-FULL-67-14b sp016871275, 95.0, 81.4, 0.569; GCA_001768615.1, s__12-FULL-67-14b sp001768615, 95.0, 80.07, 0.468; GCA_002737365.1, s__12-FULL-67-14b sp002737365, 95.0, 79.9, 0.539; GCA_009694735.1, s__12-FULL-67-14b sp009694735, 95.0, 79.87, 0.534; GCA_945866285.1, s__12-FULL-67-14b sp945866285, 95.0, 79.8, 0…	63.4	11	0.94019	Genome not assigned to closest species as it falls outside its pre-defined ANI radius
SM1000_bin.43	d__Bacteria;p__Planctomycetota;c__MHYJ01;o__MHYJ01;f__JACPRB01;g__JACQVR01;s__	N/A	N/A	N/A	N/A	N/A	GCA_016209705.1	95	d__Bacteria;p__Planctomycetota;c__MHYJ01;o__MHYJ01;f__JACPRB01;g__JACQVR01;s__JACQVR01 sp016209705	76.36	0.149	d__Bacteria;p__Planctomycetota;c__MHYJ01;o__MHYJ01;f__JACPRB01;g__JACQVR01;s__	taxonomic classification defined by topology and ANI	classification based on placement in class-level tree	N/A	48.02	11	0.86515	Genome has more than 10.8% of markers with multiple hits
SM1000_bin.44	d__Bacteria;p__Pseudomonadota;c__Gammaproteobacteria;o__Burkholderiales;f__SG8-39;g__SCGC-AG-212-J23;s__	N/A	N/A	N/A	N/A	N/A	N/A	N/A	N/A	N/A	N/A	d__Bacteria;p__Pseudomonadota;c__Gammaproteobacteria;o__Burkholderiales;f__SG8-39;g__SCGC-AG-212-J23;s__	taxonomic classification defined by topology and ANI	classification based on placement in class-level tree	GCA_001772055.1, s__SCGC-AG-212-J23 sp001772055, 95.0, 81.3, 0.399; GCA_001644455.1, s__SCGC-AG-212-J23 sp001644455, 95.0, 80.53, 0.317; GCA_005888925.1, s__SCGC-AG-212-J23 sp005888925, 95.0, 80.43, 0.468; GCA_005881595.1, s__SCGC-AG-212-J23 sp005881595, 95.0, 80.35, 0.506; GCA_004297625.1, s__SCGC-AG-212-J23 sp004297625, 95.0, 80.11, 0.573; GCA_005883675.1, s__SCGC-AG-212-J23 sp005883675, 95.0, …	42.94	11	0.939	Genome not assigned to closest species as it falls outside its pre-defined ANI radius;Genome has more than 10.0% of markers with multiple hits
SM1000_bin.46	d__Bacteria;p__Pseudomonadota;c__Gammaproteobacteria;o__Burkholderiales;f__JACQAP01;g__JACQAP01;s__	N/A	N/A	N/A	N/A	N/A	GCA_016194905.1	95	d__Bacteria;p__Pseudomonadota;c__Gammaproteobacteria;o__Burkholderiales;f__JACQAP01;g__JACQAP01;s__JACQAP01 sp016194905	78.3	0.366	d__Bacteria;p__Pseudomonadota;c__Gammaproteobacteria;o__Burkholderiales;f__JACQAP01;g__JACQAP01;s__	taxonomic classification defined by topology and ANI	classification based on placement in class-level tree	GCA_945900965.1, s__JACQAP01 sp945900965, 95.0, 76.98, 0.169	52.75	11	0.93681	N/A
SM1000_bin.47	d__Bacteria;p__Bacteroidota;c__Bacteroidia;o__Sphingobacteriales;f__Sphingobacteriaceae;g__Pedobacter;s__	N/A	N/A	N/A	N/A	N/A	GCA_014377775.1	95	d__Bacteria;p__Bacteroidota;c__Bacteroidia;o__Sphingobacteriales;f__Sphingobacteriaceae;g__Pedobacter;s__Pedobacter sp014377775	79.79	0.394	d__Bacteria;p__Bacteroidota;c__Bacteroidia;o__Sphingobacteriales;f__Sphingobacteriaceae;g__Pedobacter;s__	taxonomic classification defined by topology and ANI	classification based on placement in class-level tree	GCF_900113525.1, s__Pedobacter insulae, 95.0, 78.8, 0.344; GCF_014172375.1, s__Pedobacter planticolens, 95.0, 78.49, 0.302; GCF_013204825.1, s__Pedobacter boryungensis, 95.0, 78.48, 0.295; GCF_001412215.1, s__Pedobacter sp001412215, 95.0, 78.25, 0.285; GCA_019752795.1, s__Pedobacter sp019752795, 95.0, 78.12, 0.217; GCF_005116505.1, s__Pedobacter polaris, 95.0, 78.12, 0.311; GCF_004331645.1, s__Pe…	50.17	11	0.97994	N/A
SM1000_bin.48	d__Bacteria;p__Pseudomonadota;c__Gammaproteobacteria;o__Burkholderiales;f__JACQAP01;g__JACQAP01;s__	N/A	N/A	N/A	N/A	N/A	GCA_016194905.1	95	d__Bacteria;p__Pseudomonadota;c__Gammaproteobacteria;o__Burkholderiales;f__JACQAP01;g__JACQAP01;s__JACQAP01 sp016194905	78.82	0.472	d__Bacteria;p__Pseudomonadota;c__Gammaproteobacteria;o__Burkholderiales;f__JACQAP01;g__JACQAP01;s__	taxonomic classification defined by topology and ANI	classification based on placement in class-level tree	GCA_945900965.1, s__JACQAP01 sp945900965, 95.0, 77.26, 0.208	77.99	11	0.93969	N/A
SM1000_bin.49	d__Bacteria;p__Bacteroidota;c__Bacteroidia;o__Chitinophagales;f__Chitinophagaceae;g__Sediminibacterium;s__	N/A	N/A	N/A	N/A	N/A	N/A	N/A	N/A	N/A	N/A	d__Bacteria;p__Bacteroidota;c__Bacteroidia;o__Chitinophagales;f__Chitinophagaceae;g__Sediminibacterium;s__	ANI	classification based on placement in class-level tree	GCA_019247775.1, s__Sediminibacterium sp019247775, 95.0, 77.89, 0.292; GCF_009939225.1, s__Sediminibacterium soli, 95.0, 77.88, 0.339; GCA_016183765.1, s__Sediminibacterium sp016183765, 95.0, 77.68, 0.259; GCA_020403425.1, s__Sediminibacterium sp020403425, 95.0, 77.47, 0.26; GCA_004297075.1, s__Sediminibacterium sp004297075, 95.0, 77.24, 0.206; GCA_017987615.1, s__Sediminibacterium sp017987615, 9…	78.69	11	0.95921	N/A
SM1000_bin.5	d__Bacteria;p__Patescibacteria;c__Paceibacteria;o__UBA9983_A;f__;g__;s__	N/A	N/A	N/A	N/A	N/A	N/A	N/A	N/A	N/A	N/A	d__Bacteria;p__Patescibacteria;c__Paceibacteria;o__UBA9983_A;f__;g__;s__	taxonomic classification fully defined by topology	classification based on placement in class-level tree	N/A	65.42	11	0.81808	N/A
SM1000_bin.51	d__Bacteria;p__Bacteroidota;c__Bacteroidia;o__Chitinophagales;f__Chitinophagaceae;g__Flavipsychrobacter;s__	N/A	N/A	N/A	N/A	N/A	GCA_018267965.1	95	d__Bacteria;p__Bacteroidota;c__Bacteroidia;o__Chitinophagales;f__Chitinophagaceae;g__Flavipsychrobacter;s__Flavipsychrobacter sp018267965	79.28	0.384	d__Bacteria;p__Bacteroidota;c__Bacteroidia;o__Chitinophagales;f__Chitinophagaceae;g__Flavipsychrobacter;s__	taxonomic classification defined by topology and ANI	classification based on placement in class-level tree	GCA_016786615.1, s__Flavipsychrobacter sp016786615, 95.0, 78.25, 0.269; GCA_002337045.1, s__Flavipsychrobacter sp002337045, 95.0, 78.0, 0.297; GCA_018604165.1, s__Flavipsychrobacter sp018604165, 95.0, 77.96, 0.282; GCA_001897855.1, s__Flavipsychrobacter sp001897855, 95.0, 77.96, 0.216; GCA_017303395.1, s__Flavipsychrobacter sp017303395, 95.0, 77.85, 0.332; GCA_002389765.1, s__Flavipsychrobacter s…	54.92	11	0.96708	N/A
SM1000_bin.53	d__Bacteria;p__Chloroflexota;c__Limnocylindria;o__P2-11E;f__P2-11E;g__CF-39;s__	N/A	N/A	N/A	N/A	N/A	N/A	N/A	N/A	N/A	N/A	d__Bacteria;p__Chloroflexota;c__Limnocylindria;o__P2-11E;f__P2-11E;g__CF-39;s__	taxonomic classification defined by topology and ANI	classification based on placement in class-level tree	GCA_005882255.1, s__CF-39 sp005882255, 95.0, 82.34, 0.564; GCA_005889405.1, s__CF-39 sp005889405, 95.0, 82.25, 0.635; GCA_005887995.1, s__CF-39 sp005887995, 95.0, 78.43, 0.393	46.24	11	0.94672	Genome not assigned to closest species as it falls outside its pre-defined ANI radius
SM1000_bin.54	d__Bacteria;p__Patescibacteria;c__Paceibacteria;o__UBA9983_A;f__UBA9973;g__UBA4124;s__	N/A	N/A	N/A	N/A	N/A	N/A	N/A	N/A	N/A	N/A	d__Bacteria;p__Patescibacteria;c__Paceibacteria;o__UBA9983_A;f__UBA9973;g__UBA4124;s__	ANI	classification based on placement in class-level tree	GCA_002413705.1, s__UBA4124 sp002413705, 95.0, 79.94, 0.061; GCA_903862255.1, s__UBA4124 sp903862255, 95.0, 79.67, 0.076; GCA_018060905.1, s__UBA4124 sp018060905, 95.0, 79.33, 0.076; GCA_017991515.1, s__UBA4124 sp017991515, 95.0, 78.96, 0.427; GCA_020850295.1, s__UBA4124 sp020850295, 95.0, 78.86, 0.286; GCA_019750345.1, s__UBA4124 sp019750345, 95.0, 78.07, 0.129; GCA_020845875.1, s__UBA4124 sp020…	55.31	11	0.92877	N/A
SM1000_bin.56	d__Bacteria;p__UBP17;c__UBA6191;o__JACPRK01;f__JACQZM01;g__;s__	N/A	N/A	N/A	N/A	N/A	GCA_016213885.1	95	d__Bacteria;p__UBP17;c__UBA6191;o__JACPRK01;f__JACQZM01;g__JACQZM01;s__JACQZM01 sp016213885	75.73	0.129	d__Bacteria;p__UBP17;c__UBA6191;o__JACPRK01;f__JACQZM01;g__;s__	taxonomic classification defined by topology and ANI	classification based on placement in class-level tree	N/A	66.36	11	0.79381	Genome has more than 10.0% of markers with multiple hits
SM1000_bin.57	d__Bacteria;p__Pseudomonadota;c__Gammaproteobacteria;o__Enterobacterales;f__Enterobacteriaceae;g__Scandinavium;s__	N/A	N/A	N/A	N/A	N/A	N/A	N/A	N/A	N/A	N/A	d__Bacteria;p__Pseudomonadota;c__Gammaproteobacteria;o__Enterobacterales;f__Enterobacteriaceae;g__Scandinavium;s__	taxonomic classification defined by topology and ANI	classification based on placement in class-level tree	GCF_003935895.2, s__Scandinavium goeteborgense, 95.0, 86.85, 0.852; GCA_902706235.1, s__Scandinavium sp902706235, 95.0, 86.62, 0.861; GCA_902706205.1, s__Scandinavium sp902706205, 95.0, 86.22, 0.861; GCF_900215375.1, s__Scandinavium sp900215375, 95.0, 84.88, 0.824; GCA_002470465.1, s__Scandinavium sp002470465, 95.0, 84.8, 0.781; GCA_014156375.1, s__Scandinavium sp014156375, 95.0, 84.01, 0.792; GC…	60.2	11	0.99624	Genome not assigned to closest species as it falls outside its pre-defined ANI radius
SM1000_bin.6	d__Bacteria;p__Pseudomonadota;c__Alphaproteobacteria;o__Rickettsiales;f__JAJNBL01;g__;s__	N/A	N/A	N/A	N/A	N/A	GCA_021156175.1	95	d__Bacteria;p__Pseudomonadota;c__Alphaproteobacteria;o__Rickettsiales;f__JAJNBL01;g__JAJNBL01;s__JAJNBL01 sp021156175	75.91	0.101	d__Bacteria;p__Pseudomonadota;c__Alphaproteobacteria;o__Rickettsiales;f__JAJNBL01;g__;s__	taxonomic classification defined by topology and ANI	classification based on placement in class-level tree	N/A	73.78	11	0.78509	N/A
SM1000_bin.7	d__Bacteria;p__Bacteroidota;c__Bacteroidia;o__Chitinophagales;f__Chitinophagaceae;g__Sediminibacterium;s__	N/A	N/A	N/A	N/A	N/A	GCF_009939005.1	95	d__Bacteria;p__Bacteroidota;c__Bacteroidia;o__Chitinophagales;f__Chitinophagaceae;g__Sediminibacterium;s__Sediminibacterium roseum	78.12	0.269	d__Bacteria;p__Bacteroidota;c__Bacteroidia;o__Chitinophagales;f__Chitinophagaceae;g__Sediminibacterium;s__	taxonomic classification defined by topology and ANI	classification based on placement in class-level tree	GCA_013289065.1, s__Sediminibacterium sp013289065, 95.0, 78.65, 0.384; GCA_016183765.1, s__Sediminibacterium sp016183765, 95.0, 78.28, 0.327; GCA_004297075.1, s__Sediminibacterium sp004297075, 95.0, 78.15, 0.335; GCA_023229465.1, s__Sediminibacterium sp023229465, 95.0, 78.08, 0.293; GCA_020403425.1, s__Sediminibacterium sp020403425, 95.0, 78.04, 0.3; GCA_004028765.1, s__Sediminibacterium sp004028…	85.18	11	0.96837	N/A
SM1000_bin.9	d__Bacteria;p__Bacteroidota;c__Bacteroidia;o__Chitinophagales;f__Chitinophagaceae;g__Sediminibacterium;s__	N/A	N/A	N/A	N/A	N/A	GCF_009939005.1	95	d__Bacteria;p__Bacteroidota;c__Bacteroidia;o__Chitinophagales;f__Chitinophagaceae;g__Sediminibacterium;s__Sediminibacterium roseum	77.86	0.274	d__Bacteria;p__Bacteroidota;c__Bacteroidia;o__Chitinophagales;f__Chitinophagaceae;g__Sediminibacterium;s__	taxonomic classification defined by topology and ANI	classification based on placement in class-level tree	GCA_013289065.1, s__Sediminibacterium sp013289065, 95.0, 78.49, 0.331; GCA_016183765.1, s__Sediminibacterium sp016183765, 95.0, 77.89, 0.261; GCA_020403425.1, s__Sediminibacterium sp020403425, 95.0, 77.78, 0.245; GCA_023229465.1, s__Sediminibacterium sp023229465, 95.0, 77.62, 0.259; GCA_004297075.1, s__Sediminibacterium sp004297075, 95.0, 77.49, 0.232; GCA_903913355.1, s__Sediminibacterium sp9039…	81.67	11	0.96947	N/A
SM1002_bin.1	d__Bacteria;p__Chloroflexota;c__Limnocylindria;o__Limnocylindrales;f__CSP1-4;g__SPCO01;s__	N/A	N/A	N/A	N/A	N/A	GCA_013698385.1	95	d__Bacteria;p__Chloroflexota;c__Limnocylindria;o__Limnocylindrales;f__CSP1-4;g__SPCO01;s__SPCO01 sp013698385	78.6	0.365	d__Bacteria;p__Chloroflexota;c__Limnocylindria;o__Limnocylindrales;f__CSP1-4;g__SPCO01;s__	taxonomic classification defined by topology and ANI	classification based on placement in class-level tree	GCA_016200745.1, s__SPCO01 sp016200745, 95.0, 78.41, 0.327; GCA_004525275.1, s__SPCO01 sp004525275, 95.0, 77.38, 0.258	53.03	11	0.92091	N/A
SM1002_bin.10	d__Bacteria;p__Chloroflexota;c__UBA2235;o__UBA12225;f__UBA12225;g__;s__	N/A	N/A	N/A	N/A	N/A	GCA_902805635.1	95	d__Bacteria;p__Chloroflexota;c__UBA2235;o__UBA12225;f__UBA12225;g__CADCTC01;s__CADCTC01 sp902805635	76.52	0.245	d__Bacteria;p__Chloroflexota;c__UBA2235;o__UBA12225;f__UBA12225;g__;s__	taxonomic classification defined by topology and ANI	classification based on placement in class-level tree	N/A	54.28	11	0.78439	N/A
SM1002_bin.11	d__Bacteria;p__Actinomycetota;c__Thermoleophilia;o__Gaiellales;f__Gaiellaceae;g__Gaiella;s__	N/A	N/A	N/A	N/A	N/A	N/A	N/A	N/A	N/A	N/A	d__Bacteria;p__Actinomycetota;c__Thermoleophilia;o__Gaiellales;f__Gaiellaceae;g__Gaiella;s__	ANI	classification based on placement in class-level tree	GCF_003351045.1, s__Gaiella occulta, 95.0, 79.1, 0.364; GCA_016870235.1, s__Gaiella sp016870235, 95.0, 78.3, 0.255; GCA_013694685.1, s__Gaiella sp013694685, 95.0, 78.19, 0.247; GCA_009694305.1, s__Gaiella sp009694305, 95.0, 77.77, 0.214	46.06	11	0.90593	N/A
SM1002_bin.12	d__Bacteria;p__Pseudomonadota;c__Gammaproteobacteria;o__Xanthomonadales;f__Xanthomonadaceae;g__Lysobacter;s__	N/A	N/A	N/A	N/A	N/A	GCA_005503055.1	95	d__Bacteria;p__Pseudomonadota;c__Gammaproteobacteria;o__Xanthomonadales;f__Xanthomonadaceae;g__Lysobacter;s__Lysobacter sp005503055	89.47	0.933	d__Bacteria;p__Pseudomonadota;c__Gammaproteobacteria;o__Xanthomonadales;f__Xanthomonadaceae;g__Lysobacter;s__	taxonomic classification defined by topology and ANI	classification based on placement in class-level tree	GCF_016735495.2, s__Lysobacter sp016735495, 95.0, 88.72, 0.91; GCF_017308985.1, s__Lysobacter sp017308985, 95.0, 87.38, 0.883; GCF_003382285.1, s__Lysobacter soli, 95.0, 86.97, 0.878; GCF_009765165.1, s__Lysobacter panacisoli, 95.0, 86.23, 0.838; GCF_016613475.2, s__Lysobacter arenosi, 95.0, 84.34, 0.771; GCF_022637455.1, s__Lysobacter sp022637455, 95.0, 84.19, 0.755; GCF_009765215.1, s__Lysobact…	67.96	11	0.98545	Genome not assigned to closest species as it falls outside its pre-defined ANI radius
SM1002_bin.13	d__Bacteria;p__Pseudomonadota;c__Gammaproteobacteria;o__Burkholderiales;f__SG8-39;g__RBG-16-66-20;s__	N/A	N/A	N/A	N/A	N/A	GCA_009693345.1	95	d__Bacteria;p__Pseudomonadota;c__Gammaproteobacteria;o__Burkholderiales;f__SG8-39;g__RBG-16-66-20;s__RBG-16-66-20 sp009693345	83.36	0.45	d__Bacteria;p__Pseudomonadota;c__Gammaproteobacteria;o__Burkholderiales;f__SG8-39;g__RBG-16-66-20;s__	taxonomic classification defined by topology and ANI	classification based on placement in class-level tree	GCA_945906765.1, s__RBG-16-66-20 sp945906765, 95.0, 83.8, 0.598; GCA_005240145.1, s__RBG-16-66-20 sp005240145, 95.0, 83.04, 0.651; GCA_001770285.1, s__RBG-16-66-20 sp001770285, 95.0, 82.07, 0.524; GCA_020845995.1, s__RBG-16-66-20 sp020845995, 95.0, 81.02, 0.55; GCA_016868105.1, s__RBG-16-66-20 sp016868105, 95.0, 80.99, 0.428; GCA_016177575.1, s__RBG-16-66-20 sp016177575, 95.0, 80.92, 0.415; GCA_0…	62.8	11	0.97396	Genome not assigned to closest species as it falls outside its pre-defined ANI radius
SM1002_bin.14	d__Bacteria;p__Chloroflexota;c__FW602-bin22;o__FW602-bin22;f__FW602-bin22;g__;s__	N/A	N/A	N/A	N/A	N/A	N/A	N/A	N/A	N/A	N/A	d__Bacteria;p__Chloroflexota;c__FW602-bin22;o__FW602-bin22;f__FW602-bin22;g__;s__	taxonomic novelty determined using RED	classification based on placement in class-level tree	N/A	46.57	11	0.75541	N/A
SM1002_bin.15	d__Bacteria;p__Actinomycetota;c__Thermoleophilia;o__Gaiellales;f__Gaiellaceae;g__JACCRW01;s__	N/A	N/A	N/A	N/A	N/A	N/A	N/A	N/A	N/A	N/A	d__Bacteria;p__Actinomycetota;c__Thermoleophilia;o__Gaiellales;f__Gaiellaceae;g__JACCRW01;s__	taxonomic novelty determined using RED	classification based on placement in class-level tree	N/A	44.03	11	0.9007	N/A
SM1002_bin.16	d__Bacteria;p__Pseudomonadota;c__Alphaproteobacteria;o__Caedimonadales;f__UBA9215;g__;s__	N/A	N/A	N/A	N/A	N/A	N/A	N/A	N/A	N/A	N/A	d__Bacteria;p__Pseudomonadota;c__Alphaproteobacteria;o__Caedimonadales;f__UBA9215;g__;s__	taxonomic novelty determined using RED	classification based on placement in class-level tree	N/A	65.94	11	0.71316	Genome has more than 10.8% of markers with multiple hits
SM1002_bin.17	d__Bacteria;p__Planctomycetota;c__Planctomycetia;o__Pirellulales;f__Pirellulaceae;g__CAIPEB01;s__	N/A	N/A	N/A	N/A	N/A	GCA_903863885.1	95	d__Bacteria;p__Planctomycetota;c__Planctomycetia;o__Pirellulales;f__Pirellulaceae;g__CAIPEB01;s__CAIPEB01 sp903863885	75.76	0.037	d__Bacteria;p__Planctomycetota;c__Planctomycetia;o__Pirellulales;f__Pirellulaceae;g__CAIPEB01;s__	taxonomic classification defined by topology and ANI	classification based on placement in class-level tree	N/A	63.87	11	0.8658	N/A
SM1002_bin.18	d__Bacteria;p__Pseudomonadota;c__Gammaproteobacteria;o__Burkholderiales;f__SG8-41;g__SG8-41;s__	N/A	N/A	N/A	N/A	N/A	N/A	N/A	N/A	N/A	N/A	d__Bacteria;p__Pseudomonadota;c__Gammaproteobacteria;o__Burkholderiales;f__SG8-41;g__SG8-41;s__	taxonomic classification defined by topology and ANI	classification based on placement in class-level tree	GCA_001771935.1, s__SG8-41 sp001771935, 95.0, 80.35, 0.475; GCA_016192825.1, s__SG8-41 sp016192825, 95.0, 80.17, 0.509; GCA_016177355.1, s__SG8-41 sp016177355, 95.0, 79.72, 0.544; GCA_020028375.1, s__SG8-41 sp020028375, 95.0, 79.2, 0.495; GCA_023266245.1, s__SG8-41 sp023266245, 95.0, 79.01, 0.46; GCA_016183675.1, s__SG8-41 sp016183675, 95.0, 78.76, 0.415; GCA_016868035.1, s__SG8-41 sp016868035, 9…	66.12	11	0.9484	Genome not assigned to closest species as it falls outside its pre-defined ANI radius
SM1002_bin.19	d__Bacteria;p__Gemmatimonadota;c__Gemmatimonadetes;o__Longimicrobiales;f__RSA9;g__SH-MAG3;s__	N/A	N/A	N/A	N/A	N/A	GCA_018224305.1	95	d__Bacteria;p__Gemmatimonadota;c__Gemmatimonadetes;o__Longimicrobiales;f__RSA9;g__SH-MAG3;s__SH-MAG3 sp018224305	77.27	0.179	d__Bacteria;p__Gemmatimonadota;c__Gemmatimonadetes;o__Longimicrobiales;f__RSA9;g__SH-MAG3;s__	taxonomic classification defined by topology and ANI	classification based on placement in class-level tree	N/A	67.51	11	0.86987	N/A
SM1002_bin.2	d__Bacteria;p__Actinomycetota;c__Acidimicrobiia;o__Acidimicrobiales;f__Ilumatobacteraceae;g__Desertimonas;s__	N/A	N/A	N/A	N/A	N/A	GCF_003426815.1	95	d__Bacteria;p__Actinomycetota;c__Acidimicrobiia;o__Acidimicrobiales;f__Ilumatobacteraceae;g__Desertimonas;s__Desertimonas flava	78.19	0.353	d__Bacteria;p__Actinomycetota;c__Acidimicrobiia;o__Acidimicrobiales;f__Ilumatobacteraceae;g__Desertimonas;s__	taxonomic classification defined by topology and ANI	classification based on placement in class-level tree	N/A	49.41	11	0.90443	N/A
SM1002_bin.21	d__Bacteria;p__Acidobacteriota;c__Vicinamibacteria;o__Vicinamibacterales;f__UBA2999;g__12-FULL-67-14b;s__	N/A	N/A	N/A	N/A	N/A	N/A	N/A	N/A	N/A	N/A	d__Bacteria;p__Acidobacteriota;c__Vicinamibacteria;o__Vicinamibacterales;f__UBA2999;g__12-FULL-67-14b;s__	ANI	classification based on placement in class-level tree	GCA_019752015.1, s__12-FULL-67-14b sp019752015, 95.0, 79.63, 0.453; GCA_016871275.1, s__12-FULL-67-14b sp016871275, 95.0, 79.5, 0.412; GCA_001768615.1, s__12-FULL-67-14b sp001768615, 95.0, 79.27, 0.364; GCA_009694735.1, s__12-FULL-67-14b sp009694735, 95.0, 78.62, 0.373; GCA_021730945.1, s__12-FULL-67-14b sp021730945, 95.0, 78.58, 0.318; GCA_945866285.1, s__12-FULL-67-14b sp945866285, 95.0, 78.54,…	51.04	11	0.93888	N/A
SM1002_bin.22	d__Bacteria;p__Actinomycetota;c__Acidimicrobiia;o__Acidimicrobiales;f__Ilumatobacteraceae;g__JACCUL01;s__	N/A	N/A	N/A	N/A	N/A	GCA_013811855.1	95	d__Bacteria;p__Actinomycetota;c__Acidimicrobiia;o__Acidimicrobiales;f__Ilumatobacteraceae;g__JACCUL01;s__JACCUL01 sp013811855	80.04	0.486	d__Bacteria;p__Actinomycetota;c__Acidimicrobiia;o__Acidimicrobiales;f__Ilumatobacteraceae;g__JACCUL01;s__	taxonomic classification defined by topology and ANI	classification based on placement in class-level tree	N/A	81.25	11	0.88248	N/A
SM1002_bin.23	d__Bacteria;p__Pseudomonadota;c__Gammaproteobacteria;o__DSM-16500;f__DSM-16500;g__JAJPGW01;s__	N/A	N/A	N/A	N/A	N/A	GCA_021325575.1	95	d__Bacteria;p__Pseudomonadota;c__Gammaproteobacteria;o__DSM-16500;f__DSM-16500;g__JAJPGW01;s__JAJPGW01 sp021325575	76.69	0.151	d__Bacteria;p__Pseudomonadota;c__Gammaproteobacteria;o__DSM-16500;f__DSM-16500;g__JAJPGW01;s__	taxonomic classification defined by topology and ANI	classification based on placement in class-level tree	N/A	54.18	11	0.8692	N/A
SM1002_bin.24	d__Bacteria;p__Chloroflexota;c__Limnocylindria;o__P2-11E;f__P2-11E;g__CF-39;s__	N/A	N/A	N/A	N/A	N/A	N/A	N/A	N/A	N/A	N/A	d__Bacteria;p__Chloroflexota;c__Limnocylindria;o__P2-11E;f__P2-11E;g__CF-39;s__	taxonomic classification defined by topology and ANI	classification based on placement in class-level tree	GCA_005889405.1, s__CF-39 sp005889405, 95.0, 82.03, 0.678; GCA_005882255.1, s__CF-39 sp005882255, 95.0, 82.01, 0.587; GCA_005887995.1, s__CF-39 sp005887995, 95.0, 78.27, 0.401	36.8	11	0.9425	Genome not assigned to closest species as it falls outside its pre-defined ANI radius
SM1002_bin.25	d__Bacteria;p__Chloroflexota;c__Limnocylindria;o__P2-11E;f__P2-11E;g__JACDAF01;s__	N/A	N/A	N/A	N/A	N/A	GCA_013695575.1	95	d__Bacteria;p__Chloroflexota;c__Limnocylindria;o__P2-11E;f__P2-11E;g__JACDAF01;s__JACDAF01 sp013695575	79.46	0.516	d__Bacteria;p__Chloroflexota;c__Limnocylindria;o__P2-11E;f__P2-11E;g__JACDAF01;s__	taxonomic classification defined by topology and ANI	classification based on placement in class-level tree	N/A	34.24	11	0.92446	Genome not assigned to closest species as it falls outside its pre-defined ANI radius
SM1002_bin.26	d__Bacteria;p__Gemmatimonadota;c__Gemmatimonadetes;o__Longimicrobiales;f__RSA9;g__;s__	N/A	N/A	N/A	N/A	N/A	N/A	N/A	N/A	N/A	N/A	d__Bacteria;p__Gemmatimonadota;c__Gemmatimonadetes;o__Longimicrobiales;f__RSA9;g__;s__	taxonomic classification fully defined by topology	classification based on placement in class-level tree	N/A	49	11	0.78902	N/A
SM1002_bin.27	d__Bacteria;p__Pseudomonadota;c__Gammaproteobacteria;o__Burkholderiales;f__Burkholderiaceae_B;g__;s__	N/A	N/A	N/A	N/A	N/A	N/A	N/A	N/A	N/A	N/A	d__Bacteria;p__Pseudomonadota;c__Gammaproteobacteria;o__Burkholderiales;f__Burkholderiaceae_B;g__;s__	taxonomic classification fully defined by topology	classification based on placement in class-level tree	N/A	56.7	11	0.91649	N/A
SM1002_bin.28	d__Bacteria;p__Gemmatimonadota;c__Gemmatimonadetes;o__Gemmatimonadales;f__Gemmatimonadaceae;g__UBA4720;s__	N/A	N/A	N/A	N/A	N/A	N/A	N/A	N/A	N/A	N/A	d__Bacteria;p__Gemmatimonadota;c__Gemmatimonadetes;o__Gemmatimonadales;f__Gemmatimonadaceae;g__UBA4720;s__	ANI	classification based on placement in class-level tree	GCA_017881465.1, s__UBA4720 sp017881465, 95.0, 79.41, 0.461; GCA_003134685.1, s__UBA4720 sp003134685, 95.0, 79.14, 0.448; GCA_003131365.1, s__UBA4720 sp003131365, 95.0, 78.97, 0.373; GCA_017881545.1, s__UBA4720 sp017881545, 95.0, 78.95, 0.402; GCA_002404375.1, s__UBA4720 sp002404375, 95.0, 78.72, 0.392; GCA_003221805.1, s__UBA4720 sp003221805, 95.0, 78.24, 0.347; GCA_003223425.1, s__UBA4720 sp003…	47.31	11	0.9533	Genome has more than 10.0% of markers with multiple hits
SM1002_bin.29	d__Bacteria;p__Acidobacteriota;c__Vicinamibacteria;o__Vicinamibacterales;f__UBA2999;g__Gp6-AA40;s__	N/A	N/A	N/A	N/A	N/A	N/A	N/A	N/A	N/A	N/A	d__Bacteria;p__Acidobacteriota;c__Vicinamibacteria;o__Vicinamibacterales;f__UBA2999;g__Gp6-AA40;s__	ANI	classification based on placement in class-level tree	GCA_016871375.1, s__Gp6-AA40 sp016871375, 95.0, 78.48, 0.383; GCA_945876205.1, s__Gp6-AA40 sp945876205, 95.0, 77.89, 0.308; GCA_016184455.1, s__Gp6-AA40 sp016184455, 95.0, 77.88, 0.284; GCA_003222635.1, s__Gp6-AA40 sp003222635, 95.0, 77.79, 0.27; GCA_001767195.1, s__Gp6-AA40 sp001767195, 95.0, 77.77, 0.284; GCA_023265015.1, s__Gp6-AA40 sp023265015, 95.0, 77.77, 0.348; GCA_016192845.1, s__Gp6-AA40…	63.36	11	0.90436	N/A
SM1002_bin.3	d__Bacteria;p__Planctomycetota;c__Planctomycetia;o__Pirellulales;f__Pirellulaceae;g__CAIPEB01;s__	N/A	N/A	N/A	N/A	N/A	GCA_903863885.1	95	d__Bacteria;p__Planctomycetota;c__Planctomycetia;o__Pirellulales;f__Pirellulaceae;g__CAIPEB01;s__CAIPEB01 sp903863885	74.97	0.024	d__Bacteria;p__Planctomycetota;c__Planctomycetia;o__Pirellulales;f__Pirellulaceae;g__CAIPEB01;s__	taxonomic classification defined by topology and ANI	classification based on placement in class-level tree	N/A	46.89	11	0.8626	N/A
SM1002_bin.32	d__Bacteria;p__Planctomycetota;c__PLA2;o__PLA2;f__JAEUHO01;g__;s__	N/A	N/A	N/A	N/A	N/A	N/A	N/A	N/A	N/A	N/A	d__Bacteria;p__Planctomycetota;c__PLA2;o__PLA2;f__JAEUHO01;g__;s__	taxonomic novelty determined using RED	classification based on placement in class-level tree	N/A	48.32	11	0.81918	N/A
SM1002_bin.34	d__Bacteria;p__Pseudomonadota;c__Alphaproteobacteria;o__Rhizobiales;f__Beijerinckiaceae;g__JAJKJG01;s__	N/A	N/A	N/A	N/A	N/A	GCA_021154065.1	95	d__Bacteria;p__Pseudomonadota;c__Alphaproteobacteria;o__Rhizobiales;f__Beijerinckiaceae;g__JAJKJG01;s__JAJKJG01 sp021154065	82.47	0.567	d__Bacteria;p__Pseudomonadota;c__Alphaproteobacteria;o__Rhizobiales;f__Beijerinckiaceae;g__JAJKJG01;s__	taxonomic classification defined by topology and ANI	classification based on placement in class-level tree	GCA_000745135.1, s__JAJKJG01 sp000745135, 95.0, 79.5, 0.589	54.04	11	0.95388	Genome not assigned to closest species as it falls outside its pre-defined ANI radius
SM1002_bin.36	d__Bacteria;p__Gemmatimonadota;c__Gemmatimonadetes;o__Gemmatimonadales;f__Gemmatimonadaceae;g__;s__	N/A	N/A	N/A	N/A	N/A	N/A	N/A	N/A	N/A	N/A	d__Bacteria;p__Gemmatimonadota;c__Gemmatimonadetes;o__Gemmatimonadales;f__Gemmatimonadaceae;g__;s__	taxonomic novelty determined using RED	classification based on placement in class-level tree	N/A	68.1	11	0.88398	N/A
SM1002_bin.37	d__Bacteria;p__Pseudomonadota;c__Alphaproteobacteria;o__Reyranellales;f__Reyranellaceae;g__Reyranella;s__	N/A	N/A	N/A	N/A	N/A	GCA_945905835.1	95	d__Bacteria;p__Pseudomonadota;c__Alphaproteobacteria;o__Reyranellales;f__Reyranellaceae;g__Reyranella;s__Reyranella sp945905835	83.42	0.629	d__Bacteria;p__Pseudomonadota;c__Alphaproteobacteria;o__Reyranellales;f__Reyranellaceae;g__Reyranella;s__	taxonomic classification defined by topology and ANI	classification based on placement in class-level tree	GCA_017305915.1, s__Reyranella sp017305915, 95.0, 83.06, 0.732; GCA_021732285.1, s__Reyranella sp021732285, 95.0, 82.84, 0.646; GCA_009377525.1, s__Reyranella sp009377525, 95.0, 82.79, 0.685; GCF_007992495.1, s__Reyranella soli, 95.0, 82.75, 0.745; GCA_900110395.1, s__Reyranella sp900110395, 95.0, 82.72, 0.76; GCA_019750135.1, s__Reyranella sp019750135, 95.0, 82.7, 0.754; GCA_004296815.1, s__Reyr…	67.41	11	0.95824	Genome not assigned to closest species as it falls outside its pre-defined ANI radius
SM1002_bin.38	d__Bacteria;p__Gemmatimonadota;c__Gemmatimonadetes;o__Gemmatimonadales;f__GWC2-71-9;g__;s__	N/A	N/A	N/A	N/A	N/A	N/A	N/A	N/A	N/A	N/A	d__Bacteria;p__Gemmatimonadota;c__Gemmatimonadetes;o__Gemmatimonadales;f__GWC2-71-9;g__;s__	taxonomic novelty determined using RED	classification based on placement in class-level tree	N/A	85.2	11	0.89675	N/A
SM1002_bin.39	d__Bacteria;p__Gemmatimonadota;c__Gemmatimonadetes;o__Gemmatimonadales;f__Gemmatimonadaceae;g__;s__	N/A	N/A	N/A	N/A	N/A	N/A	N/A	N/A	N/A	N/A	d__Bacteria;p__Gemmatimonadota;c__Gemmatimonadetes;o__Gemmatimonadales;f__Gemmatimonadaceae;g__;s__	taxonomic novelty determined using RED	classification based on placement in class-level tree	N/A	55.75	11	0.8817	N/A
SM1002_bin.4	d__Bacteria;p__Chlamydiota;c__Chlamydiia;o__Chlamydiales;f__Rhabdochlamydiaceae;g__Ga0074140;s__	N/A	N/A	N/A	N/A	N/A	GCA_001464115.1	95	d__Bacteria;p__Chlamydiota;c__Chlamydiia;o__Chlamydiales;f__Rhabdochlamydiaceae;g__Ga0074140;s__Ga0074140 sp001464115	76.6	0.092	d__Bacteria;p__Chlamydiota;c__Chlamydiia;o__Chlamydiales;f__Rhabdochlamydiaceae;g__Ga0074140;s__	taxonomic classification defined by topology and ANI	classification based on placement in class-level tree	GCA_016185065.1, s__Ga0074140 sp016185065, 95.0, 76.89, 0.086	87.29	11	0.87626	N/A
SM1002_bin.40	d__Bacteria;p__Acidobacteriota;c__Vicinamibacteria;o__Vicinamibacterales;f__2-12-FULL-66-21;g__JACCXG01;s__	N/A	N/A	N/A	N/A	N/A	GCA_013697225.1	95	d__Bacteria;p__Acidobacteriota;c__Vicinamibacteria;o__Vicinamibacterales;f__2-12-FULL-66-21;g__JACCXG01;s__JACCXG01 sp013697225	77.59	0.263	d__Bacteria;p__Acidobacteriota;c__Vicinamibacteria;o__Vicinamibacterales;f__2-12-FULL-66-21;g__JACCXG01;s__	taxonomic classification defined by topology and ANI	classification based on placement in class-level tree	N/A	40.56	11	0.87431	N/A
SM1002_bin.42	d__Bacteria;p__Pseudomonadota;c__Alphaproteobacteria;o__Rhizobiales;f__Xanthobacteraceae;g__VAZQ01;s__	N/A	N/A	N/A	N/A	N/A	N/A	N/A	N/A	N/A	N/A	d__Bacteria;p__Pseudomonadota;c__Alphaproteobacteria;o__Rhizobiales;f__Xanthobacteraceae;g__VAZQ01;s__	taxonomic novelty determined using RED	classification based on placement in class-level tree	N/A	38.75	11	0.93981	N/A
SM1002_bin.43	d__Bacteria;p__Actinomycetota;c__Actinomycetia;o__Propionibacteriales;f__Nocardioidaceae;g__Nocardioides;s__	N/A	N/A	N/A	N/A	N/A	N/A	N/A	N/A	N/A	N/A	d__Bacteria;p__Actinomycetota;c__Actinomycetia;o__Propionibacteriales;f__Nocardioidaceae;g__Nocardioides;s__	taxonomic classification defined by topology and ANI	classification based on placement in class-level tree	GCF_003047285.1, s__Nocardioides allogilvus, 95.0, 85.84, 0.599; GCF_024703895.1, s__Nocardioides sp024703895, 95.0, 84.7, 0.63; GCF_003057875.1, s__Nocardioides currus, 95.0, 84.13, 0.639; GCF_011300215.1, s__Nocardioides piscis, 95.0, 82.21, 0.524; GCF_003047265.1, s__Nocardioides terrigena, 95.0, 81.99, 0.59; GCF_003047295.1, s__Nocardioides sediminis, 95.0, 81.88, 0.564; GCF_001429625.1, s__N…	41.73	11	0.97024	Genome not assigned to closest species as it falls outside its pre-defined ANI radius
SM1002_bin.44	d__Bacteria;p__Pseudomonadota;c__Gammaproteobacteria;o__Xanthomonadales;f__Xanthomonadaceae;g__Pseudoxanthomonas_A;s__	N/A	N/A	N/A	N/A	N/A	N/A	N/A	N/A	N/A	N/A	d__Bacteria;p__Pseudomonadota;c__Gammaproteobacteria;o__Xanthomonadales;f__Xanthomonadaceae;g__Pseudoxanthomonas_A;s__	taxonomic classification defined by topology and ANI	classification based on placement in class-level tree	GCF_010093305.1, s__Pseudoxanthomonas_A sacheonensis, 95.0, 87.11, 0.802; GCF_900104085.1, s__Pseudoxanthomonas_A sp900104085, 95.0, 86.97, 0.808; GCF_010093345.1, s__Pseudoxanthomonas_A yeongjuensis, 95.0, 83.73, 0.678; GCF_010119615.1, s__Pseudoxanthomonas_A gei, 95.0, 82.79, 0.626; GCA_004173415.1, s__Pseudoxanthomonas_A sp004173415, 95.0, 81.93, 0.7; GCF_900215535.1, s__Pseudoxanthomonas_A wu…	76.78	11	0.99245	Genome not assigned to closest species as it falls outside its pre-defined ANI radius
SM1002_bin.45	d__Bacteria;p__Gemmatimonadota;c__Gemmatimonadetes;o__Longimicrobiales;f__RSA9;g__SH-MAG3;s__	N/A	N/A	N/A	N/A	N/A	GCA_018224305.1	95	d__Bacteria;p__Gemmatimonadota;c__Gemmatimonadetes;o__Longimicrobiales;f__RSA9;g__SH-MAG3;s__SH-MAG3 sp018224305	77.29	0.233	d__Bacteria;p__Gemmatimonadota;c__Gemmatimonadetes;o__Longimicrobiales;f__RSA9;g__SH-MAG3;s__	taxonomic classification defined by topology and ANI	classification based on placement in class-level tree	N/A	52.17	11	0.89204	Genome has more than 10.8% of markers with multiple hits
SM1002_bin.46	d__Bacteria;p__Pseudomonadota;c__Alphaproteobacteria;o__Rhizobiales;f__Xanthobacteraceae;g__P52-10;s__	N/A	N/A	N/A	N/A	N/A	GCF_000516555.1	95	d__Bacteria;p__Pseudomonadota;c__Alphaproteobacteria;o__Rhizobiales;f__Xanthobacteraceae;g__P52-10;s__P52-10 sp000516555	80.34	0.373	d__Bacteria;p__Pseudomonadota;c__Alphaproteobacteria;o__Rhizobiales;f__Xanthobacteraceae;g__P52-10;s__	taxonomic classification defined by topology and ANI	classification based on placement in class-level tree	N/A	34.58	11	0.95272	N/A
SM1002_bin.48	d__Bacteria;p__Elusimicrobiota;c__Elusimicrobia;o__UBA1565;f__UBA9628;g__;s__	N/A	N/A	N/A	N/A	N/A	N/A	N/A	N/A	N/A	N/A	d__Bacteria;p__Elusimicrobiota;c__Elusimicrobia;o__UBA1565;f__UBA9628;g__;s__	taxonomic novelty determined using RED	classification based on placement in class-level tree	N/A	72.89	11	0.81517	N/A
SM1002_bin.49	d__Bacteria;p__Pseudomonadota;c__Alphaproteobacteria;o__Reyranellales;f__Reyranellaceae;g__;s__	N/A	N/A	N/A	N/A	N/A	N/A	N/A	N/A	N/A	N/A	d__Bacteria;p__Pseudomonadota;c__Alphaproteobacteria;o__Reyranellales;f__Reyranellaceae;g__;s__	taxonomic classification fully defined by topology	classification based on placement in class-level tree	N/A	73.64	11	0.75819	N/A
SM1002_bin.5	d__Bacteria;p__Acidobacteriota;c__Vicinamibacteria;o__Vicinamibacterales;f__UBA2999;g__JAMQPK01;s__	N/A	N/A	N/A	N/A	N/A	GCA_023717525.1	95	d__Bacteria;p__Acidobacteriota;c__Vicinamibacteria;o__Vicinamibacterales;f__UBA2999;g__JAMQPK01;s__JAMQPK01 sp023717525	77.69	0.284	d__Bacteria;p__Acidobacteriota;c__Vicinamibacteria;o__Vicinamibacterales;f__UBA2999;g__JAMQPK01;s__	taxonomic classification defined by topology and ANI	classification based on placement in class-level tree	N/A	55.51	11	0.8996	Genome has more than 13.3% of markers with multiple hits
SM1002_bin.51	d__Bacteria;p__Pseudomonadota;c__Gammaproteobacteria;o__Burkholderiales;f__Burkholderiaceae_B;g__Ramlibacter;s__	N/A	N/A	N/A	N/A	N/A	N/A	N/A	N/A	N/A	N/A	d__Bacteria;p__Pseudomonadota;c__Gammaproteobacteria;o__Burkholderiales;f__Burkholderiaceae_B;g__Ramlibacter;s__	taxonomic classification defined by topology and ANI	classification based on placement in class-level tree	GCF_013087525.1, s__Ramlibacter sp013087525, 95.0, 83.43, 0.567; GCA_022844525.1, s__Ramlibacter sp022844525, 95.0, 83.34, 0.455; GCF_016722765.1, s__Ramlibacter alkalitolerans, 95.0, 83.21, 0.6; GCF_016722785.1, s__Ramlibacter monticola, 95.0, 83.03, 0.596; GCA_021323335.1, s__Ramlibacter sp021323335, 95.0, 82.53, 0.467; GCA_023438115.1, s__Ramlibacter sp023438115, 95.0, 82.48, 0.44; GCF_0150708…	39.44	11	0.98745	Genome not assigned to closest species as it falls outside its pre-defined ANI radius
SM1002_bin.52	d__Bacteria;p__Gemmatimonadota;c__Gemmatimonadetes;o__Gemmatimonadales;f__Gemmatimonadaceae;g__;s__	N/A	N/A	N/A	N/A	N/A	N/A	N/A	N/A	N/A	N/A	d__Bacteria;p__Gemmatimonadota;c__Gemmatimonadetes;o__Gemmatimonadales;f__Gemmatimonadaceae;g__;s__	taxonomic novelty determined using RED	classification based on placement in class-level tree	N/A	64.39	11	0.88305	N/A
SM1002_bin.6	d__Bacteria;p__Pseudomonadota;c__Alphaproteobacteria;o__Rhizobiales;f__Beijerinckiaceae;g__Microvirga;s__	N/A	N/A	N/A	N/A	N/A	N/A	N/A	N/A	N/A	N/A	d__Bacteria;p__Pseudomonadota;c__Alphaproteobacteria;o__Rhizobiales;f__Beijerinckiaceae;g__Microvirga;s__	taxonomic classification defined by topology and ANI	classification based on placement in class-level tree	GCF_003350535.1, s__Microvirga subterranea, 95.0, 84.69, 0.712; GCA_023426505.1, s__Microvirga sp023426505, 95.0, 84.61, 0.661; GCF_020532555.1, s__Microvirga lenta, 95.0, 84.16, 0.678; GCF_009910705.1, s__Microvirga arsenatis, 95.0, 82.13, 0.596; GCA_023386155.1, s__Microvirga sp023386155, 95.0, 82.08, 0.596; GCF_016427565.1, s__Microvirga splendida, 95.0, 82.01, 0.593; GCF_013520865.1, s__Micro…	54.84	11	0.98681	Genome not assigned to closest species as it falls outside its pre-defined ANI radius
SM1002_bin.7	d__Bacteria;p__Chloroflexota;c__Limnocylindria;o__P2-11E;f__P2-11E;g__CF-39;s__	N/A	N/A	N/A	N/A	N/A	N/A	N/A	N/A	N/A	N/A	d__Bacteria;p__Chloroflexota;c__Limnocylindria;o__P2-11E;f__P2-11E;g__CF-39;s__	taxonomic classification defined by topology and ANI	classification based on placement in class-level tree	GCA_005889405.1, s__CF-39 sp005889405, 95.0, 81.49, 0.667; GCA_005882255.1, s__CF-39 sp005882255, 95.0, 81.47, 0.625; GCA_005887995.1, s__CF-39 sp005887995, 95.0, 78.91, 0.458	33.62	11	0.94436	Genome not assigned to closest species as it falls outside its pre-defined ANI radius
SM1002_bin.8	d__Bacteria;p__Pseudomonadota;c__Gammaproteobacteria;o__Burkholderiales;f__Burkholderiaceae_B;g__Albitalea;s__	N/A	N/A	N/A	N/A	N/A	GCA_005882155.1	95	d__Bacteria;p__Pseudomonadota;c__Gammaproteobacteria;o__Burkholderiales;f__Burkholderiaceae_B;g__Albitalea;s__Albitalea sp005882155	81.02	0.448	d__Bacteria;p__Pseudomonadota;c__Gammaproteobacteria;o__Burkholderiales;f__Burkholderiaceae_B;g__Albitalea;s__	taxonomic classification defined by topology and ANI	classification based on placement in class-level tree	GCA_905339355.1, s__Albitalea sp905339355, 95.0, 81.17, 0.452; GCF_003852895.1, s__Albitalea terrae, 95.0, 80.33, 0.517; GCA_021153565.1, s__Albitalea sp021153565, 95.0, 79.18, 0.313	45.44	11	0.97205	Genome not assigned to closest species as it falls outside its pre-defined ANI radius
SM1002_bin.9	d__Bacteria;p__Pseudomonadota;c__Gammaproteobacteria;o__Burkholderiales;f__SG8-39;g__SCGC-AG-212-J23;s__	N/A	N/A	N/A	N/A	N/A	N/A	N/A	N/A	N/A	N/A	d__Bacteria;p__Pseudomonadota;c__Gammaproteobacteria;o__Burkholderiales;f__SG8-39;g__SCGC-AG-212-J23;s__	taxonomic classification defined by topology and ANI	classification based on placement in class-level tree	GCA_001772055.1, s__SCGC-AG-212-J23 sp001772055, 95.0, 81.34, 0.394; GCA_005881595.1, s__SCGC-AG-212-J23 sp005881595, 95.0, 80.46, 0.465; GCA_005888925.1, s__SCGC-AG-212-J23 sp005888925, 95.0, 80.25, 0.417; GCA_004297625.1, s__SCGC-AG-212-J23 sp004297625, 95.0, 80.01, 0.545; GCA_001644455.1, s__SCGC-AG-212-J23 sp001644455, 95.0, 80.0, 0.348; GCA_005883675.1, s__SCGC-AG-212-J23 sp005883675, 95.0, …	41.53	11	0.9382	Genome not assigned to closest species as it falls outside its pre-defined ANI radius
SM1004_bin.1	d__Bacteria;p__Patescibacteria;c__Paceibacteria;o__UBA9983_A;f__UBA9973;g__UBA8515;s__	N/A	N/A	N/A	N/A	N/A	GCA_943356675.1	95	d__Bacteria;p__Patescibacteria;c__Paceibacteria;o__UBA9983_A;f__UBA9973;g__UBA8515;s__UBA8515 sp943356675	78.88	0.401	d__Bacteria;p__Patescibacteria;c__Paceibacteria;o__UBA9983_A;f__UBA9973;g__UBA8515;s__	taxonomic classification defined by topology and ANI	classification based on placement in class-level tree	GCA_000505065.1, s__UBA8515 sp000505065, 95.0, 78.72, 0.065; GCA_021831595.1, s__UBA8515 sp021831595, 95.0, 77.86, 0.079; GCA_016649835.1, s__UBA8515 sp016649835, 95.0, 77.68, 0.038; GCA_903854645.1, s__UBA8515 sp903854645, 95.0, 77.4, 0.058; GCA_018061145.1, s__UBA8515 sp018061145, 95.0, 77.38, 0.119; GCA_903821415.1, s__UBA8515 sp903821415, 95.0, 77.21, 0.04; GCA_903862375.1, s__UBA8515 sp90386…	64.73	11	0.94469	N/A
SM1004_bin.10	d__Bacteria;p__Chloroflexota;c__Chloroflexia;o__Thermomicrobiales;f__UBA6265;g__JACCXM01;s__	N/A	N/A	N/A	N/A	N/A	N/A	N/A	N/A	N/A	N/A	d__Bacteria;p__Chloroflexota;c__Chloroflexia;o__Thermomicrobiales;f__UBA6265;g__JACCXM01;s__	ANI	classification based on placement in class-level tree	GCA_019348515.1, s__JACCXM01 sp019348515, 95.0, 78.52, 0.263; GCA_020853615.1, s__JACCXM01 sp020853615, 95.0, 77.77, 0.271; GCA_013697005.1, s__JACCXM01 sp013697005, 95.0, 77.57, 0.289	37.22	11	0.94506	Genome has more than 12.5% of markers with multiple hits
SM1004_bin.11	d__Bacteria;p__Pseudomonadota;c__Gammaproteobacteria;o__Burkholderiales;f__SG8-39;g__2-02-FULL-62-17;s__	N/A	N/A	N/A	N/A	N/A	N/A	N/A	N/A	N/A	N/A	d__Bacteria;p__Pseudomonadota;c__Gammaproteobacteria;o__Burkholderiales;f__SG8-39;g__2-02-FULL-62-17;s__	ANI	classification based on placement in class-level tree	GCA_945897475.1, s__2-02-FULL-62-17 sp945897475, 95.0, 78.99, 0.404; GCA_001770355.1, s__2-02-FULL-62-17 sp001770355, 95.0, 78.97, 0.309; GCA_903899705.1, s__2-02-FULL-62-17 sp903899705, 95.0, 78.88, 0.416; GCA_903859155.1, s__2-02-FULL-62-17 sp903859155, 95.0, 78.59, 0.308	40.32	11	0.95091	N/A
SM1004_bin.12	d__Bacteria;p__Methylomirabilota;c__Methylomirabilia;o__Rokubacteriales;f__JACPHL01;g__;s__	N/A	N/A	N/A	N/A	N/A	GCA_016188625.1	95	d__Bacteria;p__Methylomirabilota;c__Methylomirabilia;o__Rokubacteriales;f__JACPHL01;g__JACPHL01;s__JACPHL01 sp016188625	77.19	0.332	d__Bacteria;p__Methylomirabilota;c__Methylomirabilia;o__Rokubacteriales;f__JACPHL01;g__;s__	taxonomic classification defined by topology and ANI	classification based on placement in class-level tree	N/A	78.25	11	0.77186	N/A
SM1004_bin.13	d__Bacteria;p__Bacteroidota;c__Bacteroidia;o__Chitinophagales;f__Chitinophagaceae;g__Flavipsychrobacter;s__	N/A	N/A	N/A	N/A	N/A	N/A	N/A	N/A	N/A	N/A	d__Bacteria;p__Bacteroidota;c__Bacteroidia;o__Chitinophagales;f__Chitinophagaceae;g__Flavipsychrobacter;s__	ANI	classification based on placement in class-level tree	GCA_023409975.1, s__Flavipsychrobacter sp023409975, 95.0, 77.04, 0.039; GCA_013288285.1, s__Flavipsychrobacter sp013288285, 95.0, 76.97, 0.051; GCA_018267915.1, s__Flavipsychrobacter sp018267915, 95.0, 76.94, 0.092; GCA_024508935.1, s__Flavipsychrobacter sp024508935, 95.0, 76.88, 0.134; GCA_002127285.1, s__Flavipsychrobacter sp002127285, 95.0, 76.83, 0.08; GCA_018267955.1, s__Flavipsychrobacter s…	96.13	11	0.90645	N/A
SM1004_bin.14	d__Bacteria;p__Dependentiae;c__Babeliae;o__Babeliales;f__Chromulinivoraceae;g__JACPFN01;s__	N/A	N/A	N/A	N/A	N/A	GCA_016183005.1	95	d__Bacteria;p__Dependentiae;c__Babeliae;o__Babeliales;f__Chromulinivoraceae;g__JACPFN01;s__JACPFN01 sp016183005	80.64	0.558	d__Bacteria;p__Dependentiae;c__Babeliae;o__Babeliales;f__Chromulinivoraceae;g__JACPFN01;s__	taxonomic classification defined by topology and ANI	classification based on placement in class-level tree	GCA_018061805.1, s__JACPFN01 sp018061805, 95.0, 77.72, 0.269; GCA_017992075.1, s__JACPFN01 sp017992075, 95.0, 77.53, 0.181	60.14	11	0.97367	Genome not assigned to closest species as it falls outside its pre-defined ANI radius
SM1004_bin.15	d__Bacteria;p__Pseudomonadota;c__Gammaproteobacteria;o__DSM-16500;f__DSM-16500;g__Aquicella_A;s__	N/A	N/A	N/A	N/A	N/A	GCA_013286495.1	95	d__Bacteria;p__Pseudomonadota;c__Gammaproteobacteria;o__DSM-16500;f__DSM-16500;g__Aquicella_A;s__Aquicella_A sp013286495	76.37	0.088	d__Bacteria;p__Pseudomonadota;c__Gammaproteobacteria;o__DSM-16500;f__DSM-16500;g__Aquicella_A;s__	taxonomic classification defined by topology and ANI	classification based on placement in class-level tree	GCF_902459485.1, s__Aquicella_A siphonis, 95.0, 77.0, 0.088; GCA_019634835.1, s__Aquicella_A sp019634835, 95.0, 76.85, 0.209; GCA_021324305.1, s__Aquicella_A sp021324305, 95.0, 76.48, 0.081	49.95	11	0.94519	N/A
SM1004_bin.16	d__Bacteria;p__Patescibacteria;c__Paceibacteria;o__UBA9983_A;f__UBA9973;g__UBA8515;s__	N/A	N/A	N/A	N/A	N/A	GCA_943356675.1	95	d__Bacteria;p__Patescibacteria;c__Paceibacteria;o__UBA9983_A;f__UBA9973;g__UBA8515;s__UBA8515 sp943356675	78.41	0.309	d__Bacteria;p__Patescibacteria;c__Paceibacteria;o__UBA9983_A;f__UBA9973;g__UBA8515;s__	taxonomic classification defined by topology and ANI	classification based on placement in class-level tree	GCA_903825265.1, s__UBA8515 sp903825265, 95.0, 77.78, 0.041; GCA_903891365.1, s__UBA8515 sp903891365, 95.0, 77.06, 0.073; GCA_003155695.1, s__UBA8515 sp003155695, 95.0, 77.01, 0.028; GCA_903854645.1, s__UBA8515 sp903854645, 95.0, 76.74, 0.065; GCA_021413565.1, s__UBA8515 sp021413565, 95.0, 76.72, 0.045; GCA_018061145.1, s__UBA8515 sp018061145, 95.0, 76.48, 0.073; GCA_000991405.1, s__UBA8515 sp000…	50.69	11	0.94302	N/A
SM1004_bin.17	d__Bacteria;p__Patescibacteria;c__Paceibacteria;o__2-02-FULL-40-12;f__GWA2-44-9;g__;s__	N/A	N/A	N/A	N/A	N/A	N/A	N/A	N/A	N/A	N/A	d__Bacteria;p__Patescibacteria;c__Paceibacteria;o__2-02-FULL-40-12;f__GWA2-44-9;g__;s__	taxonomic novelty determined using RED	classification based on placement in class-level tree	N/A	67.71	11	0.76432	N/A
SM1004_bin.18	d__Bacteria;p__Pseudomonadota;c__Gammaproteobacteria;o__Burkholderiales;f__Burkholderiaceae_B;g__;s__	N/A	N/A	N/A	N/A	N/A	N/A	N/A	N/A	N/A	N/A	d__Bacteria;p__Pseudomonadota;c__Gammaproteobacteria;o__Burkholderiales;f__Burkholderiaceae_B;g__;s__	taxonomic classification fully defined by topology	classification based on placement in class-level tree	N/A	76.58	11	0.90959	N/A
SM1004_bin.19	d__Bacteria;p__Pseudomonadota;c__Alphaproteobacteria;o__Rhizobiales;f__Rhizobiaceae;g__Phyllobacterium;s__Phyllobacterium sophorae	GCF_003010965.1	95	d__Bacteria;p__Pseudomonadota;c__Alphaproteobacteria;o__Rhizobiales;f__Rhizobiaceae;g__Phyllobacterium;s__Phyllobacterium sophorae	98.87	0.839	N/A	N/A	N/A	N/A	N/A	N/A	ani_screen	classification based on ANI only	N/A	N/A	N/A	N/A	N/A
SM1004_bin.2	d__Bacteria;p__Pseudomonadota;c__Gammaproteobacteria;o__DSM-16500;f__DSM-16500;g__;s__	N/A	N/A	N/A	N/A	N/A	N/A	N/A	N/A	N/A	N/A	d__Bacteria;p__Pseudomonadota;c__Gammaproteobacteria;o__DSM-16500;f__DSM-16500;g__;s__	taxonomic classification fully defined by topology	classification based on placement in class-level tree	N/A	70.33	11	0.83547	N/A
SM1004_bin.20	d__Bacteria;p__Patescibacteria;c__4484-211;o__GCA-002791395;f__GCA-002791395;g__;s__	N/A	N/A	N/A	N/A	N/A	GCA_002771355.1	95	d__Bacteria;p__Patescibacteria;c__4484-211;o__GCA-002791395;f__GCA-002791395;g__GCA-002791395;s__GCA-002791395 sp002771355	79.55	0.021	d__Bacteria;p__Patescibacteria;c__4484-211;o__GCA-002791395;f__GCA-002791395;g__;s__	taxonomic classification defined by topology and ANI	classification based on placement in class-level tree	N/A	64.73	11	0.713	N/A
SM1004_bin.21	d__Bacteria;p__Patescibacteria;c__ABY1;o__SG8-24;f__2-12-FULL-60-25;g__2-12-FULL-60-25;s__	N/A	N/A	N/A	N/A	N/A	GCA_001791275.1	95	d__Bacteria;p__Patescibacteria;c__ABY1;o__SG8-24;f__2-12-FULL-60-25;g__2-12-FULL-60-25;s__2-12-FULL-60-25 sp001791275	77.43	0.078	d__Bacteria;p__Patescibacteria;c__ABY1;o__SG8-24;f__2-12-FULL-60-25;g__2-12-FULL-60-25;s__	taxonomic classification defined by topology and ANI	classification based on placement in class-level tree	GCA_003576745.1, s__2-12-FULL-60-25 sp003576745, 95.0, 78.32, 0.042; GCA_023246415.1, s__2-12-FULL-60-25 sp023246415, 95.0, 78.1, 0.037; GCA_014728655.1, s__2-12-FULL-60-25 sp014728655, 95.0, 77.3, 0.033; GCA_018499985.1, s__2-12-FULL-60-25 sp018499985, 95.0, 76.03, 0.043	67.88	11	0.88695	N/A
SM1004_bin.23	d__Bacteria;p__Verrucomicrobiota;c__Verrucomicrobiae;o__Pedosphaerales;f__SIBE01;g__;s__	N/A	N/A	N/A	N/A	N/A	N/A	N/A	N/A	N/A	N/A	d__Bacteria;p__Verrucomicrobiota;c__Verrucomicrobiae;o__Pedosphaerales;f__SIBE01;g__;s__	taxonomic novelty determined using RED	classification based on placement in class-level tree	N/A	84.47	11	0.80602	N/A
SM1004_bin.24	d__Bacteria;p__Actinomycetota;c__Thermoleophilia;o__Solirubrobacterales;f__Solirubrobacteraceae;g__;s__	N/A	N/A	N/A	N/A	N/A	N/A	N/A	N/A	N/A	N/A	d__Bacteria;p__Actinomycetota;c__Thermoleophilia;o__Solirubrobacterales;f__Solirubrobacteraceae;g__;s__	taxonomic novelty determined using RED	classification based on placement in class-level tree	N/A	26.26	11	0.83997	N/A
SM1004_bin.27	d__Bacteria;p__Methylomirabilota;c__Methylomirabilia;o__Rokubacteriales;f__CSP1-6;g__40CM-68-15;s__	N/A	N/A	N/A	N/A	N/A	N/A	N/A	N/A	N/A	N/A	d__Bacteria;p__Methylomirabilota;c__Methylomirabilia;o__Rokubacteriales;f__CSP1-6;g__40CM-68-15;s__	taxonomic novelty determined using RED	classification based on placement in class-level tree	N/A	49.41	11	0.91222	N/A
SM1004_bin.28	d__Bacteria;p__Nitrospirota;c__Nitrospiria;o__Nitrospirales;f__Nitrospiraceae;g__SYGV01;s__	N/A	N/A	N/A	N/A	N/A	N/A	N/A	N/A	N/A	N/A	d__Bacteria;p__Nitrospirota;c__Nitrospiria;o__Nitrospirales;f__Nitrospiraceae;g__SYGV01;s__	taxonomic novelty determined using RED	classification based on placement in class-level tree	N/A	38.17	11	0.91093	N/A
SM1004_bin.29	d__Bacteria;p__Acidobacteriota;c__Vicinamibacteria;o__Vicinamibacterales;f__SCN-69-37;g__SYFT01;s__	N/A	N/A	N/A	N/A	N/A	GCA_024653875.1	95	d__Bacteria;p__Acidobacteriota;c__Vicinamibacteria;o__Vicinamibacterales;f__SCN-69-37;g__SYFT01;s__SYFT01 sp024653875	80.89	0.567	d__Bacteria;p__Acidobacteriota;c__Vicinamibacteria;o__Vicinamibacterales;f__SCN-69-37;g__SYFT01;s__	taxonomic classification defined by topology and ANI	classification based on placement in class-level tree	GCA_016716905.1, s__SYFT01 sp016716905, 95.0, 79.06, 0.357; GCA_009694745.1, s__SYFT01 sp009694745, 95.0, 78.68, 0.419; GCA_016871335.1, s__SYFT01 sp016871335, 95.0, 78.4, 0.361; GCA_005799825.1, s__SYFT01 sp005799825, 95.0, 77.96, 0.357; GCA_024640135.1, s__SYFT01 sp024640135, 95.0, 77.71, 0.26; GCA_013203475.1, s__SYFT01 sp013203475, 95.0, 77.11, 0.243	85.82	11	0.95485	Genome not assigned to closest species as it falls outside its pre-defined ANI radius
SM1004_bin.3	d__Bacteria;p__Chloroflexota;c__Anaerolineae;o__Anaerolineales;f__UBA6663;g__;s__	N/A	N/A	N/A	N/A	N/A	N/A	N/A	N/A	N/A	N/A	d__Bacteria;p__Chloroflexota;c__Anaerolineae;o__Anaerolineales;f__UBA6663;g__;s__	taxonomic classification fully defined by topology	classification based on placement in class-level tree	N/A	38.85	11	0.87634	N/A
SM1004_bin.30	d__Bacteria;p__Actinomycetota;c__Acidimicrobiia;o__IMCC26256;f__VFJJ01;g__;s__	N/A	N/A	N/A	N/A	N/A	GCA_009886115.1	95	d__Bacteria;p__Actinomycetota;c__Acidimicrobiia;o__IMCC26256;f__VFJJ01;g__VFJJ01;s__VFJJ01 sp009886115	75.83	0.13	d__Bacteria;p__Actinomycetota;c__Acidimicrobiia;o__IMCC26256;f__VFJJ01;g__;s__	taxonomic classification defined by topology and ANI	classification based on placement in class-level tree	N/A	52.04	11	0.69909	N/A
SM1004_bin.31	d__Bacteria;p__Pseudomonadota;c__Gammaproteobacteria;o__Diplorickettsiales;f__Diplorickettsiaceae;g__JABDBA01;s__	N/A	N/A	N/A	N/A	N/A	GCA_013288885.1	95	d__Bacteria;p__Pseudomonadota;c__Gammaproteobacteria;o__Diplorickettsiales;f__Diplorickettsiaceae;g__JABDBA01;s__JABDBA01 sp013288885	76.57	0.049	d__Bacteria;p__Pseudomonadota;c__Gammaproteobacteria;o__Diplorickettsiales;f__Diplorickettsiaceae;g__JABDBA01;s__	taxonomic classification defined by topology and ANI	classification based on placement in class-level tree	N/A	74.76	11	0.84327	N/A
SM1004_bin.32	d__Bacteria;p__Pseudomonadota;c__Gammaproteobacteria;o__Burkholderiales;f__Usitatibacteraceae;g__Usitatibacter;s__	N/A	N/A	N/A	N/A	N/A	GCA_012274175.1	95	d__Bacteria;p__Pseudomonadota;c__Gammaproteobacteria;o__Burkholderiales;f__Usitatibacteraceae;g__Usitatibacter;s__Usitatibacter sp012274175	80.86	0.479	d__Bacteria;p__Pseudomonadota;c__Gammaproteobacteria;o__Burkholderiales;f__Usitatibacteraceae;g__Usitatibacter;s__	taxonomic classification defined by topology and ANI	classification based on placement in class-level tree	GCA_017880705.1, s__Usitatibacter sp017880705, 95.0, 80.98, 0.506; GCF_013003965.1, s__Usitatibacter rugosus, 95.0, 80.62, 0.642; GCF_013003985.1, s__Usitatibacter palustris, 95.0, 80.13, 0.544; GCA_001953215.1, s__Usitatibacter sp001953215, 95.0, 80.07, 0.651	47.41	11	0.93825	Genome not assigned to closest species as it falls outside its pre-defined ANI radius
SM1004_bin.33	d__Bacteria;p__Gemmatimonadota;c__Gemmatimonadetes;o__Gemmatimonadales;f__GWC2-71-9;g__;s__	N/A	N/A	N/A	N/A	N/A	N/A	N/A	N/A	N/A	N/A	d__Bacteria;p__Gemmatimonadota;c__Gemmatimonadetes;o__Gemmatimonadales;f__GWC2-71-9;g__;s__	taxonomic novelty determined using RED	classification based on placement in class-level tree	N/A	52.61	11	0.88696	N/A
SM1004_bin.34	d__Bacteria;p__Patescibacteria;c__Andersenbacteria;o__;f__;g__;s__	N/A	N/A	N/A	N/A	N/A	N/A	N/A	N/A	N/A	N/A	d__Bacteria;p__Patescibacteria;c__Andersenbacteria;o__;f__;g__;s__	taxonomic novelty determined using RED	classification based on placement in class-level tree	N/A	78.31	11	0.46056	N/A
SM1004_bin.35	d__Bacteria;p__Dependentiae;c__Babeliae;o__Babeliales;f__JABCYS01;g__JABCYS01;s__	N/A	N/A	N/A	N/A	N/A	GCA_013290085.1	95	d__Bacteria;p__Dependentiae;c__Babeliae;o__Babeliales;f__JABCYS01;g__JABCYS01;s__JABCYS01 sp013290085	77.21	0.104	d__Bacteria;p__Dependentiae;c__Babeliae;o__Babeliales;f__JABCYS01;g__JABCYS01;s__	taxonomic classification defined by topology and ANI	classification based on placement in class-level tree	N/A	61.95	11	0.84366	N/A
SM1004_bin.38	d__Bacteria;p__Pseudomonadota;c__Alphaproteobacteria;o__Rhizobiales;f__Aestuariivirgaceae;g__Aestuariivirga;s__	N/A	N/A	N/A	N/A	N/A	GCA_020029455.1	95	d__Bacteria;p__Pseudomonadota;c__Alphaproteobacteria;o__Rhizobiales;f__Aestuariivirgaceae;g__Aestuariivirga;s__Aestuariivirga sp020029455	83.91	0.842	d__Bacteria;p__Pseudomonadota;c__Alphaproteobacteria;o__Rhizobiales;f__Aestuariivirgaceae;g__Aestuariivirga;s__	taxonomic classification defined by topology and ANI	classification based on placement in class-level tree	GCA_022842165.1, s__Aestuariivirga sp022842165, 95.0, 77.67, 0.264; GCA_020252385.1, s__Aestuariivirga sp020252385, 95.0, 77.52, 0.177; GCA_016710435.1, s__Aestuariivirga sp016710435, 95.0, 77.51, 0.341; GCA_016792865.1, s__Aestuariivirga sp016792865, 95.0, 77.5, 0.334; GCA_020161855.1, s__Aestuariivirga sp020161855, 95.0, 77.47, 0.312; GCA_020252395.1, s__Aestuariivirga sp020252395, 95.0, 77.44,…	61.75	11	0.99132	Genome not assigned to closest species as it falls outside its pre-defined ANI radius
SM1004_bin.39	d__Bacteria;p__Chlamydiota;c__Chlamydiia;o__Chlamydiales;f__SM23-39;g__;s__	N/A	N/A	N/A	N/A	N/A	N/A	N/A	N/A	N/A	N/A	d__Bacteria;p__Chlamydiota;c__Chlamydiia;o__Chlamydiales;f__SM23-39;g__;s__	taxonomic classification fully defined by topology	classification based on placement in class-level tree	N/A	75.15	11	0.87637	N/A
SM1004_bin.4	d__Bacteria;p__Pseudomonadota;c__Gammaproteobacteria;o__Burkholderiales;f__SG8-39;g__SCGC-AG-212-J23;s__	N/A	N/A	N/A	N/A	N/A	GCA_001644455.1	95	d__Bacteria;p__Pseudomonadota;c__Gammaproteobacteria;o__Burkholderiales;f__SG8-39;g__SCGC-AG-212-J23;s__SCGC-AG-212-J23 sp001644455	80.64	0.333	d__Bacteria;p__Pseudomonadota;c__Gammaproteobacteria;o__Burkholderiales;f__SG8-39;g__SCGC-AG-212-J23;s__	taxonomic classification defined by topology and ANI	classification based on placement in class-level tree	GCA_001772055.1, s__SCGC-AG-212-J23 sp001772055, 95.0, 81.5, 0.303; GCA_005888925.1, s__SCGC-AG-212-J23 sp005888925, 95.0, 80.6, 0.545; GCA_005883675.1, s__SCGC-AG-212-J23 sp005883675, 95.0, 80.42, 0.592; GCA_005881595.1, s__SCGC-AG-212-J23 sp005881595, 95.0, 80.28, 0.565; GCA_004297625.1, s__SCGC-AG-212-J23 sp004297625, 95.0, 80.01, 0.615; GCA_019509895.1, s__SCGC-AG-212-J23 sp019509895, 95.0, 7…	38.13	11	0.9552	Genome not assigned to closest species as it falls outside its pre-defined ANI radius
SM1004_bin.40	d__Bacteria;p__Pseudomonadota;c__Gammaproteobacteria;o__Burkholderiales;f__Burkholderiaceae_B;g__Polaromonas;s__	N/A	N/A	N/A	N/A	N/A	GCA_021731285.1	95	d__Bacteria;p__Pseudomonadota;c__Gammaproteobacteria;o__Burkholderiales;f__Burkholderiaceae_B;g__Polaromonas;s__Polaromonas sp021731285	86.78	0.755	d__Bacteria;p__Pseudomonadota;c__Gammaproteobacteria;o__Burkholderiales;f__Burkholderiaceae_B;g__Polaromonas;s__	taxonomic classification defined by topology and ANI	classification based on placement in class-level tree	GCF_000282655.1, s__Polaromonas sp000282655, 95.0, 82.64, 0.688; GCF_900103405.1, s__Polaromonas sp900103405, 95.0, 82.57, 0.726; GCF_002379085.1, s__Polaromonas sp002379085, 95.0, 82.18, 0.707; GCF_002379095.1, s__Polaromonas sp002379095, 95.0, 81.97, 0.681; GCA_002278925.1, s__Polaromonas sp002278925, 95.0, 81.94, 0.69; GCF_900116715.1, s__Polaromonas sp900116715, 95.0, 81.7, 0.669; GCF_0037112…	45.58	11	0.9933	Genome not assigned to closest species as it falls outside its pre-defined ANI radius
SM1004_bin.41	d__Bacteria;p__Patescibacteria;c__Paceibacteria;o__UBA9983_A;f__SBAW01;g__GWA1-54-10;s__	N/A	N/A	N/A	N/A	N/A	GCA_943355135.1	95	d__Bacteria;p__Patescibacteria;c__Paceibacteria;o__UBA9983_A;f__SBAW01;g__GWA1-54-10;s__GWA1-54-10 sp943355135	77.51	0.34	d__Bacteria;p__Patescibacteria;c__Paceibacteria;o__UBA9983_A;f__SBAW01;g__GWA1-54-10;s__	taxonomic classification defined by topology and ANI	classification based on placement in class-level tree	GCA_003135635.1, s__GWA1-54-10 sp003135635, 95.0, 81.79, 0.045; GCA_001773575.1, s__GWA1-54-10 sp001773575, 95.0, 81.65, 0.039; GCA_021825025.1, s__GWA1-54-10 sp021825025, 95.0, 79.04, 0.039; GCA_009691465.1, s__GWA1-54-10 sp009691465, 95.0, 79.04, 0.326; GCA_001004665.1, s__GWA1-54-10 sp001004665, 95.0, 78.88, 0.069; GCA_007375995.1, s__GWA1-54-10 sp007375995, 95.0, 78.7, 0.137; GCA_019661855.1,…	63.93	11	0.95613	N/A
SM1004_bin.42	d__Bacteria;p__Acidobacteriota;c__Vicinamibacteria;o__Vicinamibacterales;f__UBA2999;g__;s__	N/A	N/A	N/A	N/A	N/A	N/A	N/A	N/A	N/A	N/A	d__Bacteria;p__Acidobacteriota;c__Vicinamibacteria;o__Vicinamibacterales;f__UBA2999;g__;s__	taxonomic novelty determined using RED	classification based on placement in class-level tree	N/A	44.69	11	0.89873	N/A
SM1004_bin.43	d__Bacteria;p__Chlamydiota;c__Chlamydiia;o__Chlamydiales;f__Rhabdochlamydiaceae;g__;s__	N/A	N/A	N/A	N/A	N/A	N/A	N/A	N/A	N/A	N/A	d__Bacteria;p__Chlamydiota;c__Chlamydiia;o__Chlamydiales;f__Rhabdochlamydiaceae;g__;s__	taxonomic classification fully defined by topology	classification based on placement in class-level tree	N/A	58.77	11	0.79464	N/A
SM1004_bin.44	d__Bacteria;p__Pseudomonadota;c__Gammaproteobacteria;o__Legionellales;f__Legionellaceae;g__UBA11403;s__	N/A	N/A	N/A	N/A	N/A	GCA_002423125.1	95	d__Bacteria;p__Pseudomonadota;c__Gammaproteobacteria;o__Legionellales;f__Legionellaceae;g__UBA11403;s__UBA11403 sp002423125	76.48	0.076	d__Bacteria;p__Pseudomonadota;c__Gammaproteobacteria;o__Legionellales;f__Legionellaceae;g__UBA11403;s__	taxonomic classification defined by topology and ANI	classification based on placement in class-level tree	N/A	58.45	11	0.91861	N/A
SM1004_bin.5	d__Bacteria;p__Myxococcota;c__UBA727;o__UBA727;f__JABDBI01;g__;s__	N/A	N/A	N/A	N/A	N/A	GCA_023248595.1	95	d__Bacteria;p__Myxococcota;c__UBA727;o__UBA727;f__JABDBI01;g__JAHFEG01;s__JAHFEG01 sp023248595	76.72	0.031	d__Bacteria;p__Myxococcota;c__UBA727;o__UBA727;f__JABDBI01;g__;s__	taxonomic classification defined by topology and ANI	classification based on placement in class-level tree	N/A	45.88	11	0.81746	N/A
SM1004_bin.6	d__Bacteria;p__Acidobacteriota;c__Vicinamibacteria;o__Fen-336;f__JAGNNV01;g__JAGNNV01;s__	N/A	N/A	N/A	N/A	N/A	N/A	N/A	N/A	N/A	N/A	d__Bacteria;p__Acidobacteriota;c__Vicinamibacteria;o__Fen-336;f__JAGNNV01;g__JAGNNV01;s__	ANI	classification based on placement in class-level tree	GCA_019694155.1, s__JAGNNV01 sp019694155, 95.0, 78.81, 0.366; GCA_017990495.1, s__JAGNNV01 sp017990495, 95.0, 78.5, 0.364; GCA_016650185.1, s__JAGNNV01 sp016650185, 95.0, 77.85, 0.323	84.65	11	0.94146	N/A
SM1004_bin.8	d__Bacteria;p__Pseudomonadota;c__Gammaproteobacteria;o__Burkholderiales;f__Burkholderiaceae_B;g__Polaromonas;s__	N/A	N/A	N/A	N/A	N/A	N/A	N/A	N/A	N/A	N/A	d__Bacteria;p__Pseudomonadota;c__Gammaproteobacteria;o__Burkholderiales;f__Burkholderiaceae_B;g__Polaromonas;s__	taxonomic classification defined by topology and ANI	classification based on placement in class-level tree	GCF_900103405.1, s__Polaromonas sp900103405, 95.0, 91.24, 0.922; GCF_000282655.1, s__Polaromonas sp000282655, 95.0, 90.64, 0.917; GCF_900116715.1, s__Polaromonas sp900116715, 95.0, 86.37, 0.809; GCF_003711205.1, s__Polaromonas sp003711205, 95.0, 86.35, 0.8; GCA_021153985.1, s__Polaromonas sp021153985, 95.0, 85.39, 0.775; GCF_001598235.1, s__Polaromonas jejuensis, 95.0, 82.86, 0.664; GCF_002379085…	38.29	11	0.99588	Genome not assigned to closest species as it falls outside its pre-defined ANI radius
SM1004_bin.9	d__Bacteria;p__Planctomycetota;c__UBA8742;o__UBA2392;f__JABWBM01;g__;s__	N/A	N/A	N/A	N/A	N/A	GCA_013360495.1	95	d__Bacteria;p__Planctomycetota;c__UBA8742;o__UBA2392;f__JABWBM01;g__JABWBM01;s__JABWBM01 sp013360495	76.22	0.071	d__Bacteria;p__Planctomycetota;c__UBA8742;o__UBA2392;f__JABWBM01;g__;s__	taxonomic classification defined by topology and ANI	classification based on placement in class-level tree	N/A	77.76	11	0.79252	N/A
SM1005_bin.10	d__Bacteria;p__Planctomycetota;c__Planctomycetia;o__Gemmatales;f__Gemmataceae;g__JAGVLI01;s__	N/A	N/A	N/A	N/A	N/A	GCA_020054355.1	95	d__Bacteria;p__Planctomycetota;c__Planctomycetia;o__Gemmatales;f__Gemmataceae;g__JAGVLI01;s__JAGVLI01 sp020054355	89.19	0.778	d__Bacteria;p__Planctomycetota;c__Planctomycetia;o__Gemmatales;f__Gemmataceae;g__JAGVLI01;s__	taxonomic classification defined by topology and ANI	classification based on placement in class-level tree	GCA_016795185.1, s__JAGVLI01 sp016795185, 95.0, 82.34, 0.581	74.32	11	0.97444	Genome not assigned to closest species as it falls outside its pre-defined ANI radius
SM1005_bin.11	d__Bacteria;p__Hydrogenedentota;c__Hydrogenedentia;o__Hydrogenedentiales;f__JAEUWI01;g__JAEUWI01;s__	N/A	N/A	N/A	N/A	N/A	GCA_016791475.1	95	d__Bacteria;p__Hydrogenedentota;c__Hydrogenedentia;o__Hydrogenedentiales;f__JAEUWI01;g__JAEUWI01;s__JAEUWI01 sp016791475	80.8	0.653	d__Bacteria;p__Hydrogenedentota;c__Hydrogenedentia;o__Hydrogenedentiales;f__JAEUWI01;g__JAEUWI01;s__	taxonomic classification defined by topology and ANI	classification based on placement in class-level tree	GCA_019637335.1, s__JAEUWI01 sp019637335, 95.0, 77.57, 0.246; GCA_024280935.1, s__JAEUWI01 sp024280935, 95.0, 76.42, 0.157	41.53	11	0.97715	Genome not assigned to closest species as it falls outside its pre-defined ANI radius
SM1005_bin.12	d__Bacteria;p__Patescibacteria;c__ABY1;o__GWA2-46-9;f__GWA2-46-9;g__;s__	N/A	N/A	N/A	N/A	N/A	N/A	N/A	N/A	N/A	N/A	d__Bacteria;p__Patescibacteria;c__ABY1;o__GWA2-46-9;f__GWA2-46-9;g__;s__	taxonomic novelty determined using RED	classification based on placement in class-level tree	N/A	76.05	11	0.75391	N/A
SM1005_bin.13	d__Bacteria;p__Verrucomicrobiota;c__Verrucomicrobiae;o__Opitutales;f__UBA953;g__;s__	N/A	N/A	N/A	N/A	N/A	N/A	N/A	N/A	N/A	N/A	d__Bacteria;p__Verrucomicrobiota;c__Verrucomicrobiae;o__Opitutales;f__UBA953;g__;s__	taxonomic classification fully defined by topology	classification based on placement in class-level tree	N/A	50.61	11	0.80158	N/A
SM1005_bin.14	d__Bacteria;p__Pseudomonadota;c__Gammaproteobacteria;o__Coxiellales;f__Coxiellaceae;g__;s__	N/A	N/A	N/A	N/A	N/A	GCA_018241585.1	95	d__Bacteria;p__Pseudomonadota;c__Gammaproteobacteria;o__Coxiellales;f__Coxiellaceae;g__JAFEDN01;s__JAFEDN01 sp018241585	76.35	0.017	d__Bacteria;p__Pseudomonadota;c__Gammaproteobacteria;o__Coxiellales;f__Coxiellaceae;g__;s__	taxonomic classification defined by topology and ANI	classification based on placement in class-level tree	N/A	65.76	11	0.81483	N/A
SM1005_bin.15	d__Bacteria;p__Acidobacteriota;c__Vicinamibacteria;o__Vicinamibacterales;f__UBA2999;g__12-FULL-67-14b;s__	N/A	N/A	N/A	N/A	N/A	N/A	N/A	N/A	N/A	N/A	d__Bacteria;p__Acidobacteriota;c__Vicinamibacteria;o__Vicinamibacterales;f__UBA2999;g__12-FULL-67-14b;s__	ANI	classification based on placement in class-level tree	GCA_019752015.1, s__12-FULL-67-14b sp019752015, 95.0, 79.42, 0.41; GCA_016871275.1, s__12-FULL-67-14b sp016871275, 95.0, 79.24, 0.281; GCA_001768615.1, s__12-FULL-67-14b sp001768615, 95.0, 79.06, 0.325; GCA_009694735.1, s__12-FULL-67-14b sp009694735, 95.0, 78.86, 0.269; GCA_002737365.1, s__12-FULL-67-14b sp002737365, 95.0, 78.58, 0.249; GCA_945866285.1, s__12-FULL-67-14b sp945866285, 95.0, 78.53,…	52.06	11	0.93942	N/A
SM1005_bin.17	d__Bacteria;p__Pseudomonadota;c__Gammaproteobacteria;o__Burkholderiales;f__SG8-39;g__CAILKO01;s__	N/A	N/A	N/A	N/A	N/A	GCA_903834835.1	95	d__Bacteria;p__Pseudomonadota;c__Gammaproteobacteria;o__Burkholderiales;f__SG8-39;g__CAILKO01;s__CAILKO01 sp903834835	76.83	0.142	d__Bacteria;p__Pseudomonadota;c__Gammaproteobacteria;o__Burkholderiales;f__SG8-39;g__CAILKO01;s__	taxonomic classification defined by topology and ANI	classification based on placement in class-level tree	N/A	49.53	11	0.87249	N/A
SM1005_bin.18	d__Bacteria;p__Pseudomonadota;c__Gammaproteobacteria;o__Legionellales;f__Legionellaceae;g__Legionella_A;s__	N/A	N/A	N/A	N/A	N/A	GCA_945862405.1	95	d__Bacteria;p__Pseudomonadota;c__Gammaproteobacteria;o__Legionellales;f__Legionellaceae;g__Legionella_A;s__Legionella_A sp945862405	78.53	0.351	d__Bacteria;p__Pseudomonadota;c__Gammaproteobacteria;o__Legionellales;f__Legionellaceae;g__Legionella_A;s__	taxonomic classification defined by topology and ANI	classification based on placement in class-level tree	GCF_900640115.1, s__Legionella_A yabuuchiae, 95.0, 77.66, 0.073; GCF_900637865.1, s__Legionella_A adelaidensis, 95.0, 77.5, 0.08; GCF_900639875.1, s__Legionella_A impletisoli, 95.0, 77.35, 0.069; GCF_001467825.1, s__Legionella_A londiniensis, 95.0, 77.25, 0.065; GCF_900639915.1, s__Legionella_A nagasakiensis, 95.0, 77.24, 0.083; GCF_003989745.1, s__Legionella_A septentrionalis, 95.0, 77.03, 0.089…	95.87	11	0.9635	N/A
SM1005_bin.19	d__Bacteria;p__Patescibacteria;c__Microgenomatia;o__UBA1406;f__GWC2-37-13;g__GCA-016432445;s__	N/A	N/A	N/A	N/A	N/A	GCA_016432445.1	95	d__Bacteria;p__Patescibacteria;c__Microgenomatia;o__UBA1406;f__GWC2-37-13;g__GCA-016432445;s__GCA-016432445 sp016432445	76.93	0.041	d__Bacteria;p__Patescibacteria;c__Microgenomatia;o__UBA1406;f__GWC2-37-13;g__GCA-016432445;s__	taxonomic classification defined by topology and ANI	classification based on placement in class-level tree	N/A	48.02	11	0.84488	N/A
SM1005_bin.2	d__Bacteria;p__Margulisbacteria;c__Marinamargulisbacteria;o__SXXA01;f__JAHFDB01;g__;s__	N/A	N/A	N/A	N/A	N/A	GCA_023249285.1	95	d__Bacteria;p__Margulisbacteria;c__Marinamargulisbacteria;o__SXXA01;f__JAHFDB01;g__JAHFCZ01;s__JAHFCZ01 sp023249285	78.02	0.034	d__Bacteria;p__Margulisbacteria;c__Marinamargulisbacteria;o__SXXA01;f__JAHFDB01;g__;s__	taxonomic classification defined by topology and ANI	classification based on placement in class-level tree	N/A	90.55	11	0.78937	N/A
SM1005_bin.20	d__Bacteria;p__Pseudomonadota;c__Gammaproteobacteria;o__Pseudomonadales;f__Pseudomonadaceae;g__Pseudomonas_E;s__	N/A	N/A	N/A	N/A	N/A	N/A	N/A	N/A	N/A	N/A	d__Bacteria;p__Pseudomonadota;c__Gammaproteobacteria;o__Pseudomonadales;f__Pseudomonadaceae;g__Pseudomonas_E;s__	taxonomic classification defined by topology and ANI	classification based on placement in class-level tree	GCF_900187565.1, s__Pseudomonas_E sp900187565, 95.0, 91.16, 0.625; GCF_020423045.1, s__Pseudomonas_E sp000282415, 95.0, 90.43, 0.652; GCF_002236105.1, s__Pseudomonas_E umsongensis, 95.0, 88.81, 0.644; GCF_902498065.1, s__Pseudomonas_E fluorescens_BJ, 95.0, 87.49, 0.612; GCF_000282475.1, s__Pseudomonas_E sp000282475, 95.0, 87.47, 0.605; GCF_013359695.1, s__Pseudomonas_E sp013359695, 95.0, 87.3, 0.…	34.32	11	0.9943	Genome not assigned to closest species as it falls outside its pre-defined ANI radius
SM1005_bin.21	d__Bacteria;p__Pseudomonadota;c__Gammaproteobacteria;o__Burkholderiales;f__SG8-41;g__SG8-41;s__	N/A	N/A	N/A	N/A	N/A	GCA_001771935.1	95	d__Bacteria;p__Pseudomonadota;c__Gammaproteobacteria;o__Burkholderiales;f__SG8-41;g__SG8-41;s__SG8-41 sp001771935	80.11	0.531	d__Bacteria;p__Pseudomonadota;c__Gammaproteobacteria;o__Burkholderiales;f__SG8-41;g__SG8-41;s__	taxonomic classification defined by topology and ANI	classification based on placement in class-level tree	GCA_016192825.1, s__SG8-41 sp016192825, 95.0, 79.77, 0.559; GCA_016177355.1, s__SG8-41 sp016177355, 95.0, 79.42, 0.309; GCA_023266245.1, s__SG8-41 sp023266245, 95.0, 78.96, 0.355; GCA_020028375.1, s__SG8-41 sp020028375, 95.0, 78.77, 0.4; GCA_016183675.1, s__SG8-41 sp016183675, 95.0, 78.66, 0.414; GCA_016868035.1, s__SG8-41 sp016868035, 95.0, 78.12, 0.416; GCA_020854035.1, s__SG8-41 sp020854035, 9…	41.27	11	0.96758	Genome not assigned to closest species as it falls outside its pre-defined ANI radius
SM1005_bin.22	d__Bacteria;p__Gemmatimonadota;c__Gemmatimonadetes;o__Longimicrobiales;f__RSA9;g__;s__	N/A	N/A	N/A	N/A	N/A	N/A	N/A	N/A	N/A	N/A	d__Bacteria;p__Gemmatimonadota;c__Gemmatimonadetes;o__Longimicrobiales;f__RSA9;g__;s__	taxonomic classification fully defined by topology	classification based on placement in class-level tree	N/A	43.71	11	0.79032	N/A
SM1005_bin.23	d__Bacteria;p__Pseudomonadota;c__Gammaproteobacteria;o__DSM-16500;f__DSM-16500;g__2-12-FULL-42-10;s__	N/A	N/A	N/A	N/A	N/A	GCA_001801625.1	95	d__Bacteria;p__Pseudomonadota;c__Gammaproteobacteria;o__DSM-16500;f__DSM-16500;g__2-12-FULL-42-10;s__2-12-FULL-42-10 sp001801625	76.2	0.06	d__Bacteria;p__Pseudomonadota;c__Gammaproteobacteria;o__DSM-16500;f__DSM-16500;g__2-12-FULL-42-10;s__	taxonomic classification defined by topology and ANI	classification based on placement in class-level tree	N/A	97.3	11	0.8844	N/A
SM1005_bin.24	d__Bacteria;p__Pseudomonadota;c__Gammaproteobacteria;o__DSM-16500;f__DSM-16500;g__JAKBCU01;s__	N/A	N/A	N/A	N/A	N/A	GCA_021807565.1	95	d__Bacteria;p__Pseudomonadota;c__Gammaproteobacteria;o__DSM-16500;f__DSM-16500;g__JAKBCU01;s__JAKBCU01 sp021807565	75.8	0.075	d__Bacteria;p__Pseudomonadota;c__Gammaproteobacteria;o__DSM-16500;f__DSM-16500;g__JAKBCU01;s__	taxonomic classification defined by topology and ANI	classification based on placement in class-level tree	N/A	64.79	11	0.8718	N/A
SM1005_bin.25	d__Bacteria;p__Bacteroidota;c__Bacteroidia;o__Chitinophagales;f__Saprospiraceae;g__UBA3362;s__	N/A	N/A	N/A	N/A	N/A	GCA_016717265.1	95	d__Bacteria;p__Bacteroidota;c__Bacteroidia;o__Chitinophagales;f__Saprospiraceae;g__UBA3362;s__UBA3362 sp016717265	76.32	0.121	d__Bacteria;p__Bacteroidota;c__Bacteroidia;o__Chitinophagales;f__Saprospiraceae;g__UBA3362;s__	taxonomic classification defined by topology and ANI	classification based on placement in class-level tree	GCA_020848995.1, s__UBA3362 sp020848995, 95.0, 76.58, 0.017; GCA_016787575.1, s__UBA3362 sp016787575, 95.0, 76.48, 0.085; GCA_016712145.1, s__UBA3362 sp016712145, 95.0, 76.39, 0.099; GCA_016719615.1, s__UBA3362 sp016719615, 95.0, 76.36, 0.074; GCA_016722295.1, s__UBA3362 sp016722295, 95.0, 76.35, 0.034; GCA_016714025.1, s__UBA3362 sp016714025, 95.0, 76.33, 0.099; GCA_016716185.1, s__UBA3362 sp016…	61.29	11	0.95384	N/A
SM1005_bin.26	d__Bacteria;p__Fibrobacterota;c__Fibrobacteria;o__UBA11236;f__UBA11236;g__UBA11236;s__	N/A	N/A	N/A	N/A	N/A	GCA_021155885.1	95	d__Bacteria;p__Fibrobacterota;c__Fibrobacteria;o__UBA11236;f__UBA11236;g__UBA11236;s__UBA11236 sp021155885	78.13	0.288	d__Bacteria;p__Fibrobacterota;c__Fibrobacteria;o__UBA11236;f__UBA11236;g__UBA11236;s__	taxonomic classification defined by topology and ANI	classification based on placement in class-level tree	GCA_900299345.1, s__UBA11236 sp003455335, 95.0, 77.19, 0.109	44.99	11	0.92637	N/A
SM1005_bin.27	d__Bacteria;p__Patescibacteria;c__Doudnabacteria;o__UBA920;f__O2-02-FULL-48-8;g__O2-12-FULL-42-9;s__	N/A	N/A	N/A	N/A	N/A	GCA_001777665.1	95	d__Bacteria;p__Patescibacteria;c__Doudnabacteria;o__UBA920;f__O2-02-FULL-48-8;g__O2-12-FULL-42-9;s__O2-12-FULL-42-9 sp001777665	76.83	0.152	d__Bacteria;p__Patescibacteria;c__Doudnabacteria;o__UBA920;f__O2-02-FULL-48-8;g__O2-12-FULL-42-9;s__	taxonomic classification defined by topology and ANI	classification based on placement in class-level tree	N/A	68.58	11	0.89235	N/A
SM1005_bin.28	d__Bacteria;p__Pseudomonadota;c__Gammaproteobacteria;o__Burkholderiales;f__JACQAP01;g__JACQAP01;s__	N/A	N/A	N/A	N/A	N/A	GCA_016194905.1	95	d__Bacteria;p__Pseudomonadota;c__Gammaproteobacteria;o__Burkholderiales;f__JACQAP01;g__JACQAP01;s__JACQAP01 sp016194905	78.01	0.413	d__Bacteria;p__Pseudomonadota;c__Gammaproteobacteria;o__Burkholderiales;f__JACQAP01;g__JACQAP01;s__	taxonomic classification defined by topology and ANI	classification based on placement in class-level tree	GCA_945900965.1, s__JACQAP01 sp945900965, 95.0, 76.74, 0.182	53.23	11	0.9344	N/A
SM1005_bin.29	d__Bacteria;p__Pseudomonadota;c__Gammaproteobacteria;o__CAISUE01;f__CAISUE01;g__;s__	N/A	N/A	N/A	N/A	N/A	N/A	N/A	N/A	N/A	N/A	d__Bacteria;p__Pseudomonadota;c__Gammaproteobacteria;o__CAISUE01;f__CAISUE01;g__;s__	taxonomic novelty determined using RED	classification based on placement in class-level tree	N/A	73.55	11	0.74482	N/A
SM1005_bin.3	d__Bacteria;p__Gemmatimonadota;c__Gemmatimonadetes;o__Gemmatimonadales;f__GWC2-71-9;g__;s__	N/A	N/A	N/A	N/A	N/A	N/A	N/A	N/A	N/A	N/A	d__Bacteria;p__Gemmatimonadota;c__Gemmatimonadetes;o__Gemmatimonadales;f__GWC2-71-9;g__;s__	taxonomic novelty determined using RED	classification based on placement in class-level tree	N/A	49.37	11	0.84345	N/A
SM1005_bin.31	d__Bacteria;p__Patescibacteria;c__ABY1;o__Buchananbacterales;f__;g__;s__	N/A	N/A	N/A	N/A	N/A	N/A	N/A	N/A	N/A	N/A	d__Bacteria;p__Patescibacteria;c__ABY1;o__Buchananbacterales;f__;g__;s__	taxonomic novelty determined using RED	classification based on placement in class-level tree	N/A	59.62	11	0.68179	N/A
SM1005_bin.32	d__Bacteria;p__Pseudomonadota;c__Gammaproteobacteria;o__DSM-16500;f__DSM-16500;g__UBA4722;s__	N/A	N/A	N/A	N/A	N/A	N/A	N/A	N/A	N/A	N/A	d__Bacteria;p__Pseudomonadota;c__Gammaproteobacteria;o__DSM-16500;f__DSM-16500;g__UBA4722;s__	ANI	classification based on placement in class-level tree	GCA_002404295.1, s__UBA4722 sp002404295, 95.0, 78.54, 0.488; GCA_023265835.1, s__UBA4722 sp023265835, 95.0, 78.39, 0.375; GCA_014132595.1, s__UBA4722 sp014132595, 95.0, 77.91, 0.371; GCA_021156085.1, s__UBA4722 sp021156085, 95.0, 77.87, 0.375; GCA_021323555.1, s__UBA4722 sp021323555, 95.0, 77.46, 0.264; GCA_013287235.1, s__UBA4722 sp013287235, 95.0, 76.89, 0.057; GCA_013287765.1, s__UBA4722 sp013…	55.79	11	0.94268	N/A
SM1005_bin.33	d__Bacteria;p__Patescibacteria;c__Microgenomatia;o__Woykebacterales;f__2-01-FULL-43-14;g__;s__	N/A	N/A	N/A	N/A	N/A	GCA_001816835.1	95	d__Bacteria;p__Patescibacteria;c__Microgenomatia;o__Woykebacterales;f__2-01-FULL-43-14;g__2-01-FULL-43-14;s__2-01-FULL-43-14 sp001816835	77.1	0.016	d__Bacteria;p__Patescibacteria;c__Microgenomatia;o__Woykebacterales;f__2-01-FULL-43-14;g__;s__	taxonomic classification defined by topology and ANI	classification based on placement in class-level tree	N/A	48	11	0.71394	N/A
SM1005_bin.34	d__Bacteria;p__Verrucomicrobiota;c__Verrucomicrobiae;o__Opitutales;f__Opitutaceae;g__Lacunisphaera;s__	N/A	N/A	N/A	N/A	N/A	GCA_023269445.1	95	d__Bacteria;p__Verrucomicrobiota;c__Verrucomicrobiae;o__Opitutales;f__Opitutaceae;g__Lacunisphaera;s__Lacunisphaera sp023269445	81.98	0.492	d__Bacteria;p__Verrucomicrobiota;c__Verrucomicrobiae;o__Opitutales;f__Opitutaceae;g__Lacunisphaera;s__	taxonomic classification defined by topology and ANI	classification based on placement in class-level tree	GCA_016795565.1, s__Lacunisphaera sp016795565, 95.0, 80.12, 0.387; GCF_900104925.1, s__Lacunisphaera sp900104925, 95.0, 80.1, 0.446; GCF_001746835.1, s__Lacunisphaera limnophila, 95.0, 80.06, 0.522; GCA_016190985.1, s__Lacunisphaera sp016190985, 95.0, 79.86, 0.397; GCF_004118375.1, s__Lacunisphaera lenta, 95.0, 79.82, 0.476; GCA_023433275.1, s__Lacunisphaera sp023433275, 95.0, 79.35, 0.445; GCA_9…	56.76	11	0.96391	Genome not assigned to closest species as it falls outside its pre-defined ANI radius
SM1005_bin.35	d__Bacteria;p__Acidobacteriota;c__Vicinamibacteria;o__Vicinamibacterales;f__UBA2999;g__12-FULL-67-14b;s__	N/A	N/A	N/A	N/A	N/A	GCA_001768615.1	95	d__Bacteria;p__Acidobacteriota;c__Vicinamibacteria;o__Vicinamibacterales;f__UBA2999;g__12-FULL-67-14b;s__12-FULL-67-14b sp001768615	82.67	0.561	d__Bacteria;p__Acidobacteriota;c__Vicinamibacteria;o__Vicinamibacterales;f__UBA2999;g__12-FULL-67-14b;s__	taxonomic classification defined by topology and ANI	classification based on placement in class-level tree	GCA_019752015.1, s__12-FULL-67-14b sp019752015, 95.0, 80.03, 0.506; GCA_009694735.1, s__12-FULL-67-14b sp009694735, 95.0, 79.92, 0.47; GCA_945866285.1, s__12-FULL-67-14b sp945866285, 95.0, 79.83, 0.489; GCA_016871275.1, s__12-FULL-67-14b sp016871275, 95.0, 79.74, 0.408; GCA_002737365.1, s__12-FULL-67-14b sp002737365, 95.0, 79.67, 0.453; GCA_021730945.1, s__12-FULL-67-14b sp021730945, 95.0, 79.64,…	48	11	0.96289	Genome not assigned to closest species as it falls outside its pre-defined ANI radius
SM1005_bin.36	d__Bacteria;p__Gemmatimonadota;c__Gemmatimonadetes;o__Longimicrobiales;f__RSA9;g__;s__	N/A	N/A	N/A	N/A	N/A	N/A	N/A	N/A	N/A	N/A	d__Bacteria;p__Gemmatimonadota;c__Gemmatimonadetes;o__Longimicrobiales;f__RSA9;g__;s__	taxonomic classification fully defined by topology	classification based on placement in class-level tree	N/A	47.59	11	0.791	N/A
SM1005_bin.38	d__Bacteria;p__Planctomycetota;c__JAJSAM01;o__JAKLKS01;f__JAKLKS01;g__JAKLKS01;s__	N/A	N/A	N/A	N/A	N/A	GCA_023150535.1	95	d__Bacteria;p__Planctomycetota;c__JAJSAM01;o__JAKLKS01;f__JAKLKS01;g__JAKLKS01;s__JAKLKS01 sp023150535	79.77	0.673	d__Bacteria;p__Planctomycetota;c__JAJSAM01;o__JAKLKS01;f__JAKLKS01;g__JAKLKS01;s__	taxonomic classification defined by topology and ANI	classification based on placement in class-level tree	N/A	56.88	11	0.88616	Genome not assigned to closest species as it falls outside its pre-defined ANI radius
SM1005_bin.39	d__Bacteria;p__Pseudomonadota;c__Gammaproteobacteria;o__Burkholderiales;f__Burkholderiaceae_B;g__Ramlibacter;s__	N/A	N/A	N/A	N/A	N/A	N/A	N/A	N/A	N/A	N/A	d__Bacteria;p__Pseudomonadota;c__Gammaproteobacteria;o__Burkholderiales;f__Burkholderiaceae_B;g__Ramlibacter;s__	taxonomic classification defined by topology and ANI	classification based on placement in class-level tree	GCF_013087525.1, s__Ramlibacter sp013087525, 95.0, 83.62, 0.646; GCA_022844525.1, s__Ramlibacter sp022844525, 95.0, 83.33, 0.517; GCF_007833165.1, s__Ramlibacter sp007833165, 95.0, 83.05, 0.698; GCA_023438115.1, s__Ramlibacter sp023438115, 95.0, 82.98, 0.518; GCA_013127575.1, s__Ramlibacter sp013127575, 95.0, 82.96, 0.627; GCA_021323335.1, s__Ramlibacter sp021323335, 95.0, 82.96, 0.593; GCF_01507…	43.63	11	0.97805	Genome not assigned to closest species as it falls outside its pre-defined ANI radius
SM1005_bin.4	d__Bacteria;p__Pseudomonadota;c__Gammaproteobacteria;o__DSM-16500;f__DSM-16500;g__Aquicella_A;s__	N/A	N/A	N/A	N/A	N/A	GCA_013286495.1	95	d__Bacteria;p__Pseudomonadota;c__Gammaproteobacteria;o__DSM-16500;f__DSM-16500;g__Aquicella_A;s__Aquicella_A sp013286495	77.86	0.128	d__Bacteria;p__Pseudomonadota;c__Gammaproteobacteria;o__DSM-16500;f__DSM-16500;g__Aquicella_A;s__	taxonomic classification defined by topology and ANI	classification based on placement in class-level tree	GCF_902459485.1, s__Aquicella_A siphonis, 95.0, 76.99, 0.1; GCA_019634835.1, s__Aquicella_A sp019634835, 95.0, 76.98, 0.136; GCA_021324305.1, s__Aquicella_A sp021324305, 95.0, 76.94, 0.098	74.74	11	0.95081	N/A
SM1005_bin.41	d__Bacteria;p__Patescibacteria;c__Microgenomatia;o__Levybacterales;f__UBA12049;g__JAHFKF01;s__	N/A	N/A	N/A	N/A	N/A	GCA_023245475.1	95	d__Bacteria;p__Patescibacteria;c__Microgenomatia;o__Levybacterales;f__UBA12049;g__JAHFKF01;s__JAHFKF01 sp023245475	76.22	0.067	d__Bacteria;p__Patescibacteria;c__Microgenomatia;o__Levybacterales;f__UBA12049;g__JAHFKF01;s__	taxonomic classification defined by topology and ANI	classification based on placement in class-level tree	N/A	53.13	11	0.89371	N/A
SM1005_bin.42	d__Bacteria;p__Actinomycetota;c__Acidimicrobiia;o__UBA5794;f__ZC4RG35;g__JACCTH01;s__	N/A	N/A	N/A	N/A	N/A	GCA_013812505.1	95	d__Bacteria;p__Actinomycetota;c__Acidimicrobiia;o__UBA5794;f__ZC4RG35;g__JACCTH01;s__JACCTH01 sp013812505	76.84	0.157	d__Bacteria;p__Actinomycetota;c__Acidimicrobiia;o__UBA5794;f__ZC4RG35;g__JACCTH01;s__	taxonomic classification defined by topology and ANI	classification based on placement in class-level tree	N/A	53.82	11	0.87537	N/A
SM1005_bin.43	d__Bacteria;p__Gemmatimonadota;c__Gemmatimonadetes;o__Longimicrobiales;f__RSA9;g__;s__	N/A	N/A	N/A	N/A	N/A	N/A	N/A	N/A	N/A	N/A	d__Bacteria;p__Gemmatimonadota;c__Gemmatimonadetes;o__Longimicrobiales;f__RSA9;g__;s__	taxonomic classification fully defined by topology	classification based on placement in class-level tree	N/A	72.08	11	0.78696	N/A
SM1005_bin.44	d__Bacteria;p__Patescibacteria;c__Paceibacteria;o__UBA9983_A;f__VMGT01;g__;s__	N/A	N/A	N/A	N/A	N/A	N/A	N/A	N/A	N/A	N/A	d__Bacteria;p__Patescibacteria;c__Paceibacteria;o__UBA9983_A;f__VMGT01;g__;s__	taxonomic novelty determined using RED	classification based on placement in class-level tree	N/A	63.87	11	0.75136	N/A
SM1005_bin.45	d__Bacteria;p__Chloroflexota;c__Limnocylindria;o__P2-11E;f__P2-11E;g__CF-39;s__	N/A	N/A	N/A	N/A	N/A	N/A	N/A	N/A	N/A	N/A	d__Bacteria;p__Chloroflexota;c__Limnocylindria;o__P2-11E;f__P2-11E;g__CF-39;s__	taxonomic classification defined by topology and ANI	classification based on placement in class-level tree	GCA_005882255.1, s__CF-39 sp005882255, 95.0, 81.2, 0.527; GCA_005889405.1, s__CF-39 sp005889405, 95.0, 80.68, 0.575; GCA_005887995.1, s__CF-39 sp005887995, 95.0, 79.54, 0.531	34.04	11	0.92556	Genome not assigned to closest species as it falls outside its pre-defined ANI radius
SM1005_bin.46	d__Bacteria;p__Actinomycetota;c__Thermoleophilia;o__Gaiellales;f__Gaiellaceae;g__Gaiella;s__	N/A	N/A	N/A	N/A	N/A	N/A	N/A	N/A	N/A	N/A	d__Bacteria;p__Actinomycetota;c__Thermoleophilia;o__Gaiellales;f__Gaiellaceae;g__Gaiella;s__	ANI	classification based on placement in class-level tree	GCF_003351045.1, s__Gaiella occulta, 95.0, 79.06, 0.466; GCA_016870235.1, s__Gaiella sp016870235, 95.0, 78.36, 0.294; GCA_013694685.1, s__Gaiella sp013694685, 95.0, 78.04, 0.282; GCA_009694305.1, s__Gaiella sp009694305, 95.0, 77.61, 0.258	57.78	11	0.90524	N/A
SM1005_bin.47	d__Bacteria;p__Pseudomonadota;c__Alphaproteobacteria;o__UBA9655;f__UBA9655;g__JACPNY01;s__	N/A	N/A	N/A	N/A	N/A	GCA_016185255.1	95	d__Bacteria;p__Pseudomonadota;c__Alphaproteobacteria;o__UBA9655;f__UBA9655;g__JACPNY01;s__JACPNY01 sp016185255	76.63	0.23	d__Bacteria;p__Pseudomonadota;c__Alphaproteobacteria;o__UBA9655;f__UBA9655;g__JACPNY01;s__	taxonomic classification defined by topology and ANI	classification based on placement in class-level tree	N/A	69.77	11	0.88203	N/A
SM1005_bin.48	d__Bacteria;p__Verrucomicrobiota;c__Verrucomicrobiae;o__Pedosphaerales;f__JACPZS01;g__;s__	N/A	N/A	N/A	N/A	N/A	GCA_016195385.1	95	d__Bacteria;p__Verrucomicrobiota;c__Verrucomicrobiae;o__Pedosphaerales;f__JACPZS01;g__JACPZS01;s__JACPZS01 sp016195385	76.15	0.082	d__Bacteria;p__Verrucomicrobiota;c__Verrucomicrobiae;o__Pedosphaerales;f__JACPZS01;g__;s__	taxonomic classification defined by topology and ANI	classification based on placement in class-level tree	N/A	66.87	11	0.79424	N/A
SM1005_bin.49	d__Bacteria;p__Pseudomonadota;c__Alphaproteobacteria;o__Micavibrionales;f__UBA2020;g__PALSA-926;s__	N/A	N/A	N/A	N/A	N/A	N/A	N/A	N/A	N/A	N/A	d__Bacteria;p__Pseudomonadota;c__Alphaproteobacteria;o__Micavibrionales;f__UBA2020;g__PALSA-926;s__	taxonomic classification defined by topology and ANI	classification based on placement in class-level tree	GCA_018971405.1, s__PALSA-926 sp018971405, 95.0, 79.92, 0.465; GCA_021849295.1, s__PALSA-926 sp021849295, 95.0, 79.77, 0.494; GCA_021845905.1, s__PALSA-926 sp021845905, 95.0, 79.27, 0.537; GCA_021805245.1, s__PALSA-926 sp021805245, 95.0, 79.21, 0.488; GCA_021413445.1, s__PALSA-926 sp021413445, 95.0, 78.87, 0.419; GCA_003153235.1, s__PALSA-926 sp003153235, 95.0, 77.99, 0.34; GCA_023266795.1, s__PA…	67.49	11	0.91237	Genome not assigned to closest species as it falls outside its pre-defined ANI radius
SM1005_bin.5	d__Bacteria;p__Acidobacteriota;c__Vicinamibacteria;o__Fen-336;f__Fen-336;g__AA29;s__	N/A	N/A	N/A	N/A	N/A	GCA_003222295.1	95	d__Bacteria;p__Acidobacteriota;c__Vicinamibacteria;o__Fen-336;f__Fen-336;g__AA29;s__AA29 sp003222295	78.59	0.375	d__Bacteria;p__Acidobacteriota;c__Vicinamibacteria;o__Fen-336;f__Fen-336;g__AA29;s__	taxonomic classification defined by topology and ANI	classification based on placement in class-level tree	N/A	71.08	11	0.86554	N/A
SM1005_bin.50	d__Bacteria;p__Pseudomonadota;c__Gammaproteobacteria;o__Burkholderiales;f__Burkholderiaceae_B;g__Ramlibacter;s__	N/A	N/A	N/A	N/A	N/A	N/A	N/A	N/A	N/A	N/A	d__Bacteria;p__Pseudomonadota;c__Gammaproteobacteria;o__Burkholderiales;f__Burkholderiaceae_B;g__Ramlibacter;s__	taxonomic classification defined by topology and ANI	classification based on placement in class-level tree	GCF_013087525.1, s__Ramlibacter sp013087525, 95.0, 83.32, 0.655; GCA_022844525.1, s__Ramlibacter sp022844525, 95.0, 83.27, 0.505; GCA_004144865.1, s__Ramlibacter sp004144865, 95.0, 83.04, 0.577; GCA_023438115.1, s__Ramlibacter sp023438115, 95.0, 83.03, 0.522; GCF_015070875.1, s__Ramlibacter sp015070875, 95.0, 82.92, 0.601; GCA_023436025.1, s__Ramlibacter sp023436025, 95.0, 82.77, 0.51; GCF_014297…	57.6	11	0.97809	Genome not assigned to closest species as it falls outside its pre-defined ANI radius
SM1005_bin.51	d__Bacteria;p__Pseudomonadota;c__Gammaproteobacteria;o__Legionellales;f__Legionellaceae;g__2-12-FULL-37-14;s__	N/A	N/A	N/A	N/A	N/A	GCA_001804735.1	95	d__Bacteria;p__Pseudomonadota;c__Gammaproteobacteria;o__Legionellales;f__Legionellaceae;g__2-12-FULL-37-14;s__2-12-FULL-37-14 sp001804735	76.71	0.07	d__Bacteria;p__Pseudomonadota;c__Gammaproteobacteria;o__Legionellales;f__Legionellaceae;g__2-12-FULL-37-14;s__	taxonomic classification defined by topology and ANI	classification based on placement in class-level tree	N/A	66.85	11	0.88612	N/A
SM1005_bin.53	d__Bacteria;p__Dependentiae;c__Babeliae;o__Babeliales;f__Vermiphilaceae;g__;s__	N/A	N/A	N/A	N/A	N/A	GCA_018266085.1	95	d__Bacteria;p__Dependentiae;c__Babeliae;o__Babeliales;f__Vermiphilaceae;g__JAFEAZ01;s__JAFEAZ01 sp018266085	75.66	0.069	d__Bacteria;p__Dependentiae;c__Babeliae;o__Babeliales;f__Vermiphilaceae;g__;s__	taxonomic classification defined by topology and ANI	classification based on placement in class-level tree	N/A	68.7	11	0.81653	N/A
SM1005_bin.56	d__Bacteria;p__Acidobacteriota;c__Vicinamibacteria;o__Vicinamibacterales;f__UBA2999;g__JAMQPK01;s__	N/A	N/A	N/A	N/A	N/A	GCA_023717525.1	95	d__Bacteria;p__Acidobacteriota;c__Vicinamibacteria;o__Vicinamibacterales;f__UBA2999;g__JAMQPK01;s__JAMQPK01 sp023717525	77.8	0.242	d__Bacteria;p__Acidobacteriota;c__Vicinamibacteria;o__Vicinamibacterales;f__UBA2999;g__JAMQPK01;s__	taxonomic classification defined by topology and ANI	classification based on placement in class-level tree	N/A	45.04	11	0.90083	N/A
SM1005_bin.57	d__Bacteria;p__Bacteroidota;c__Bacteroidia;o__Chitinophagales;f__Chitinophagaceae;g__Sediminibacterium;s__	N/A	N/A	N/A	N/A	N/A	N/A	N/A	N/A	N/A	N/A	d__Bacteria;p__Bacteroidota;c__Bacteroidia;o__Chitinophagales;f__Chitinophagaceae;g__Sediminibacterium;s__	ANI	classification based on placement in class-level tree	GCA_023256555.1, s__Sediminibacterium sp023256555, 95.0, 78.34, 0.011; GCF_009939225.1, s__Sediminibacterium soli, 95.0, 77.78, 0.305; GCA_019247775.1, s__Sediminibacterium sp019247775, 95.0, 77.66, 0.27; GCA_020403425.1, s__Sediminibacterium sp020403425, 95.0, 77.64, 0.201; GCA_016183765.1, s__Sediminibacterium sp016183765, 95.0, 77.59, 0.23; GCA_002973575.1, s__Sediminibacterium magnilacihabita…	38.89	11	0.95597	Genome has more than 14.2% of markers with multiple hits
SM1005_bin.58	d__Bacteria;p__Patescibacteria;c__Paceibacteria;o__UBA9983_A;f__UBA2100;g__UBA10103;s__	N/A	N/A	N/A	N/A	N/A	GCA_021413775.1	95	d__Bacteria;p__Patescibacteria;c__Paceibacteria;o__UBA9983_A;f__UBA2100;g__UBA10103;s__UBA10103 sp021413775	76.86	0.185	d__Bacteria;p__Patescibacteria;c__Paceibacteria;o__UBA9983_A;f__UBA2100;g__UBA10103;s__	taxonomic classification defined by topology and ANI	classification based on placement in class-level tree	GCA_019247335.1, s__UBA10103 sp019247335, 95.0, 78.53, 0.235; GCA_018061585.1, s__UBA10103 sp018061585, 95.0, 77.84, 0.105; GCA_003599175.1, s__UBA10103 sp003599175, 95.0, 77.8, 0.13; GCA_943359705.1, s__UBA10103 sp943359705, 95.0, 77.59, 0.099; GCA_016432285.1, s__UBA10103 sp016432285, 95.0, 77.47, 0.198; GCA_003599295.1, s__UBA10103 sp003599295, 95.0, 77.42, 0.056; GCA_016217925.1, s__UBA10103 …	51.58	11	0.95431	N/A
SM1005_bin.59	d__Bacteria;p__Patescibacteria;c__Paceibacteria;o__UBA9983_A;f__UBA2100;g__UBA10103;s__	N/A	N/A	N/A	N/A	N/A	GCA_023267655.1	95	d__Bacteria;p__Patescibacteria;c__Paceibacteria;o__UBA9983_A;f__UBA2100;g__UBA10103;s__UBA10103 sp023267655	77.41	0.281	d__Bacteria;p__Patescibacteria;c__Paceibacteria;o__UBA9983_A;f__UBA2100;g__UBA10103;s__	taxonomic classification defined by topology and ANI	classification based on placement in class-level tree	GCA_019247335.1, s__UBA10103 sp019247335, 95.0, 78.23, 0.096; GCA_021731295.1, s__UBA10103 sp021731295, 95.0, 77.7, 0.042; GCA_016789445.1, s__UBA10103 sp016789445, 95.0, 77.66, 0.2; GCA_018061585.1, s__UBA10103 sp018061585, 95.0, 77.34, 0.035; GCA_943359395.1, s__UBA10103 sp943359395, 95.0, 77.26, 0.027; GCA_024654165.1, s__UBA10103 sp024654165, 95.0, 77.16, 0.031; GCA_943359705.1, s__UBA10103 s…	64.81	11	0.95594	N/A
SM1005_bin.6	d__Bacteria;p__Fibrobacterota;c__Fibrobacteria;o__UBA11236;f__UBA11236;g__UBA11236;s__	N/A	N/A	N/A	N/A	N/A	GCA_021155885.1	95	d__Bacteria;p__Fibrobacterota;c__Fibrobacteria;o__UBA11236;f__UBA11236;g__UBA11236;s__UBA11236 sp021155885	79.64	0.522	d__Bacteria;p__Fibrobacterota;c__Fibrobacteria;o__UBA11236;f__UBA11236;g__UBA11236;s__	taxonomic classification defined by topology and ANI	classification based on placement in class-level tree	GCA_900299345.1, s__UBA11236 sp003455335, 95.0, 76.68, 0.143	56.76	11	0.93142	Genome not assigned to closest species as it falls outside its pre-defined ANI radius
SM1005_bin.60	d__Bacteria;p__Chloroflexota;c__Limnocylindria;o__P2-11E;f__P2-11E;g__CF-39;s__	N/A	N/A	N/A	N/A	N/A	N/A	N/A	N/A	N/A	N/A	d__Bacteria;p__Chloroflexota;c__Limnocylindria;o__P2-11E;f__P2-11E;g__CF-39;s__	ANI	classification based on placement in class-level tree	GCA_005882255.1, s__CF-39 sp005882255, 95.0, 81.52, 0.435; GCA_005889405.1, s__CF-39 sp005889405, 95.0, 81.48, 0.413; GCA_005887995.1, s__CF-39 sp005887995, 95.0, 78.23, 0.296	32.53	11	0.92245	N/A
SM1005_bin.61	d__Bacteria;p__Bacteroidota;c__Bacteroidia;o__Chitinophagales;f__Chitinophagaceae;g__Sediminibacterium;s__	N/A	N/A	N/A	N/A	N/A	N/A	N/A	N/A	N/A	N/A	d__Bacteria;p__Bacteroidota;c__Bacteroidia;o__Chitinophagales;f__Chitinophagaceae;g__Sediminibacterium;s__	ANI	classification based on placement in class-level tree	GCF_009939225.1, s__Sediminibacterium soli, 95.0, 77.88, 0.319; GCA_019247775.1, s__Sediminibacterium sp019247775, 95.0, 77.73, 0.285; GCA_016183765.1, s__Sediminibacterium sp016183765, 95.0, 77.59, 0.247; GCA_020403425.1, s__Sediminibacterium sp020403425, 95.0, 77.38, 0.245; GCA_013289065.1, s__Sediminibacterium sp013289065, 95.0, 77.15, 0.208; GCA_002973575.1, s__Sediminibacterium magnilacihabi…	79.36	11	0.95875	N/A
SM1005_bin.62	d__Bacteria;p__Patescibacteria;c__ABY1;o__SG8-24;f__2-12-FULL-60-25;g__JAHJRN01;s__	N/A	N/A	N/A	N/A	N/A	GCA_018830865.1	95	d__Bacteria;p__Patescibacteria;c__ABY1;o__SG8-24;f__2-12-FULL-60-25;g__JAHJRN01;s__JAHJRN01 sp018830865	78.01	0.093	d__Bacteria;p__Patescibacteria;c__ABY1;o__SG8-24;f__2-12-FULL-60-25;g__JAHJRN01;s__	taxonomic classification defined by topology and ANI	classification based on placement in class-level tree	N/A	75.43	11	0.88612	N/A
SM1005_bin.63	d__Bacteria;p__Pseudomonadota;c__Alphaproteobacteria;o__Reyranellales;f__Reyranellaceae;g__Reyranella;s__	N/A	N/A	N/A	N/A	N/A	GCA_022844015.1	95	d__Bacteria;p__Pseudomonadota;c__Alphaproteobacteria;o__Reyranellales;f__Reyranellaceae;g__Reyranella;s__Reyranella sp022844015	81.66	0.547	d__Bacteria;p__Pseudomonadota;c__Alphaproteobacteria;o__Reyranellales;f__Reyranellaceae;g__Reyranella;s__	taxonomic classification defined by topology and ANI	classification based on placement in class-level tree	GCA_009377525.1, s__Reyranella sp009377525, 95.0, 84.38, 0.667; GCA_021732285.1, s__Reyranella sp021732285, 95.0, 84.19, 0.62; GCA_900110395.1, s__Reyranella sp900110395, 95.0, 84.06, 0.732; GCF_007992495.1, s__Reyranella soli, 95.0, 83.89, 0.734; GCA_019750135.1, s__Reyranella sp019750135, 95.0, 83.62, 0.732; GCA_016185145.1, s__Reyranella sp016185145, 95.0, 83.6, 0.682; GCA_023386865.1, s__Reyr…	45.82	11	0.94367	Genome not assigned to closest species as it falls outside its pre-defined ANI radius
SM1005_bin.64	d__Bacteria;p__Acidobacteriota;c__Vicinamibacteria;o__Fen-336;f__JAGNNV01;g__JAGNNV01;s__	N/A	N/A	N/A	N/A	N/A	N/A	N/A	N/A	N/A	N/A	d__Bacteria;p__Acidobacteriota;c__Vicinamibacteria;o__Fen-336;f__JAGNNV01;g__JAGNNV01;s__	taxonomic classification defined by topology and ANI	classification based on placement in class-level tree	GCA_019694155.1, s__JAGNNV01 sp019694155, 95.0, 80.35, 0.599; GCA_017990495.1, s__JAGNNV01 sp017990495, 95.0, 79.26, 0.401; GCA_016650185.1, s__JAGNNV01 sp016650185, 95.0, 77.9, 0.322	51.88	11	0.93991	Genome not assigned to closest species as it falls outside its pre-defined ANI radius
SM1005_bin.65	d__Bacteria;p__Pseudomonadota;c__Alphaproteobacteria;o__Sphingomonadales;f__Sphingomonadaceae;g__Allosphingosinicella;s__	N/A	N/A	N/A	N/A	N/A	GCA_005883305.1	95	d__Bacteria;p__Pseudomonadota;c__Alphaproteobacteria;o__Sphingomonadales;f__Sphingomonadaceae;g__Allosphingosinicella;s__Allosphingosinicella sp005883305	86.82	0.809	d__Bacteria;p__Pseudomonadota;c__Alphaproteobacteria;o__Sphingomonadales;f__Sphingomonadaceae;g__Allosphingosinicella;s__	taxonomic classification defined by topology and ANI	classification based on placement in class-level tree	GCA_019239785.1, s__Allosphingosinicella sp019239785, 95.0, 81.98, 0.552; GCA_019635535.1, s__Allosphingosinicella sp019635535, 95.0, 81.43, 0.595; GCF_007995055.1, s__Allosphingosinicella ginsenosidimutans, 95.0, 80.84, 0.565; GCA_023390415.1, s__Allosphingosinicella sp023390415, 95.0, 80.81, 0.494; GCF_011320075.1, s__Allosphingosinicella sp011320075, 95.0, 80.59, 0.536; GCA_023417515.1, s__All…	67.73	11	0.97932	Genome not assigned to closest species as it falls outside its pre-defined ANI radius
SM1005_bin.66	d__Bacteria;p__Pseudomonadota;c__Gammaproteobacteria;o__DSM-16500;f__DSM-16500;g__;s__	N/A	N/A	N/A	N/A	N/A	N/A	N/A	N/A	N/A	N/A	d__Bacteria;p__Pseudomonadota;c__Gammaproteobacteria;o__DSM-16500;f__DSM-16500;g__;s__	taxonomic classification fully defined by topology	classification based on placement in class-level tree	N/A	86.4	11	0.83694	N/A
SM1005_bin.67	d__Bacteria;p__Planctomycetota;c__Planctomycetia;o__Pirellulales;f__Pirellulaceae;g__CAIPEB01;s__	N/A	N/A	N/A	N/A	N/A	GCA_903863885.1	95	d__Bacteria;p__Planctomycetota;c__Planctomycetia;o__Pirellulales;f__Pirellulaceae;g__CAIPEB01;s__CAIPEB01 sp903863885	75.41	0.021	d__Bacteria;p__Planctomycetota;c__Planctomycetia;o__Pirellulales;f__Pirellulaceae;g__CAIPEB01;s__	taxonomic classification defined by topology and ANI	classification based on placement in class-level tree	N/A	39.21	11	0.8633	N/A
SM1005_bin.68	d__Bacteria;p__Pseudomonadota;c__Gammaproteobacteria;o__Xanthomonadales;f__Xanthomonadaceae;g__Lysobacter;s__	N/A	N/A	N/A	N/A	N/A	GCA_005503055.1	95	d__Bacteria;p__Pseudomonadota;c__Gammaproteobacteria;o__Xanthomonadales;f__Xanthomonadaceae;g__Lysobacter;s__Lysobacter sp005503055	88.45	0.752	d__Bacteria;p__Pseudomonadota;c__Gammaproteobacteria;o__Xanthomonadales;f__Xanthomonadaceae;g__Lysobacter;s__	taxonomic classification defined by topology and ANI	classification based on placement in class-level tree	GCF_016735495.2, s__Lysobacter sp016735495, 95.0, 87.64, 0.749; GCF_017308985.1, s__Lysobacter sp017308985, 95.0, 86.27, 0.722; GCF_003382285.1, s__Lysobacter soli, 95.0, 85.85, 0.743; GCF_009765165.1, s__Lysobacter panacisoli, 95.0, 85.03, 0.704; GCF_016613475.2, s__Lysobacter arenosi, 95.0, 84.15, 0.673; GCF_022637455.1, s__Lysobacter sp022637455, 95.0, 84.01, 0.683; GCF_009765215.1, s__Lysobac…	35.57	11	0.98548	Genome not assigned to closest species as it falls outside its pre-defined ANI radius
SM1005_bin.69	d__Bacteria;p__Armatimonadota;c__SYMT01;o__SYMT01;f__SYMT01;g__JAJFMS01;s__	N/A	N/A	N/A	N/A	N/A	GCA_020696885.1	95	d__Bacteria;p__Armatimonadota;c__SYMT01;o__SYMT01;f__SYMT01;g__JAJFMS01;s__JAJFMS01 sp020696885	77.05	0.135	d__Bacteria;p__Armatimonadota;c__SYMT01;o__SYMT01;f__SYMT01;g__JAJFMS01;s__	taxonomic classification defined by topology and ANI	classification based on placement in class-level tree	N/A	43.08	11	0.90062	N/A
SM1005_bin.70	d__Bacteria;p__Planctomycetota;c__Planctomycetia;o__Gemmatales;f__Gemmataceae;g__;s__	N/A	N/A	N/A	N/A	N/A	N/A	N/A	N/A	N/A	N/A	d__Bacteria;p__Planctomycetota;c__Planctomycetia;o__Gemmatales;f__Gemmataceae;g__;s__	taxonomic classification fully defined by topology	classification based on placement in class-level tree	N/A	37.82	11	0.84188	N/A
SM1005_bin.71	d__Bacteria;p__Patescibacteria;c__ABY1;o__SG8-24;f__SG8-24;g__;s__	N/A	N/A	N/A	N/A	N/A	N/A	N/A	N/A	N/A	N/A	d__Bacteria;p__Patescibacteria;c__ABY1;o__SG8-24;f__SG8-24;g__;s__	taxonomic classification fully defined by topology	classification based on placement in class-level tree	N/A	63.69	11	0.84899	N/A
SM1005_bin.72	d__Bacteria;p__Pseudomonadota;c__Gammaproteobacteria;o__Burkholderiales;f__Burkholderiaceae_B;g__Rhodoferax_C;s__	N/A	N/A	N/A	N/A	N/A	GCF_017798165.1	95	d__Bacteria;p__Pseudomonadota;c__Gammaproteobacteria;o__Burkholderiales;f__Burkholderiaceae_B;g__Rhodoferax_C;s__Rhodoferax_C sp017798165	85.27	0.711	d__Bacteria;p__Pseudomonadota;c__Gammaproteobacteria;o__Burkholderiales;f__Burkholderiaceae_B;g__Rhodoferax_C;s__	taxonomic classification defined by topology and ANI	classification based on placement in class-level tree	GCA_016703945.1, s__Rhodoferax_C sp016703945, 95.0, 81.05, 0.441; GCA_903853895.1, s__Rhodoferax_C sp903853895, 95.0, 80.77, 0.449; GCA_019449595.1, s__Rhodoferax_C sp019449595, 95.0, 80.62, 0.396; GCA_001795455.1, s__Rhodoferax_C sp001795455, 95.0, 80.24, 0.408; GCF_002943465.1, s__Rhodoferax_C sp002943465, 95.0, 80.21, 0.423; GCF_001955715.1, s__Rhodoferax_C saidenbachensis, 95.0, 80.16, 0.413;…	45.42	11	0.99669	Genome not assigned to closest species as it falls outside its pre-defined ANI radius
SM1005_bin.8	d__Bacteria;p__Dependentiae;c__Babeliae;o__Babeliales;f__Vermiphilaceae;g__SOIL31;s__	N/A	N/A	N/A	N/A	N/A	GCA_001468865.1	95	d__Bacteria;p__Dependentiae;c__Babeliae;o__Babeliales;f__Vermiphilaceae;g__SOIL31;s__SOIL31 sp001468865	85.64	0.756	d__Bacteria;p__Dependentiae;c__Babeliae;o__Babeliales;f__Vermiphilaceae;g__SOIL31;s__	taxonomic classification defined by topology and ANI	classification based on placement in class-level tree	N/A	61.93	11	0.98605	Genome not assigned to closest species as it falls outside its pre-defined ANI radius
SM1005_bin.9	d__Bacteria;p__Pseudomonadota;c__Gammaproteobacteria;o__Burkholderiales;f__SG8-41;g__SG8-41;s__	N/A	N/A	N/A	N/A	N/A	N/A	N/A	N/A	N/A	N/A	d__Bacteria;p__Pseudomonadota;c__Gammaproteobacteria;o__Burkholderiales;f__SG8-41;g__SG8-41;s__	taxonomic classification defined by topology and ANI	classification based on placement in class-level tree	GCA_001771935.1, s__SG8-41 sp001771935, 95.0, 81.37, 0.562; GCA_016192825.1, s__SG8-41 sp016192825, 95.0, 80.87, 0.577; GCA_016177355.1, s__SG8-41 sp016177355, 95.0, 80.73, 0.337; GCA_023266245.1, s__SG8-41 sp023266245, 95.0, 80.08, 0.316; GCA_020028375.1, s__SG8-41 sp020028375, 95.0, 79.84, 0.372; GCA_016183675.1, s__SG8-41 sp016183675, 95.0, 79.66, 0.404; GCA_016868035.1, s__SG8-41 sp016868035,…	39.07	11	0.95224	Genome not assigned to closest species as it falls outside its pre-defined ANI radius
SM1028_bin.10	d__Bacteria;p__Chlamydiota;c__Chlamydiia;o__Chlamydiales;f__Rhabdochlamydiaceae;g__;s__	N/A	N/A	N/A	N/A	N/A	N/A	N/A	N/A	N/A	N/A	d__Bacteria;p__Chlamydiota;c__Chlamydiia;o__Chlamydiales;f__Rhabdochlamydiaceae;g__;s__	taxonomic classification fully defined by topology	classification based on placement in class-level tree	N/A	87.33	11	0.78648	N/A
SM1028_bin.11	d__Bacteria;p__Pseudomonadota;c__Alphaproteobacteria;o__Rhizobiales;f__Rhizobiaceae;g__Pararhizobium;s__	N/A	N/A	N/A	N/A	N/A	GCA_900468065.1	95	d__Bacteria;p__Pseudomonadota;c__Alphaproteobacteria;o__Rhizobiales;f__Rhizobiaceae;g__Pararhizobium;s__Pararhizobium sp900468065	91.98	0.835	d__Bacteria;p__Pseudomonadota;c__Alphaproteobacteria;o__Rhizobiales;f__Rhizobiaceae;g__Pararhizobium;s__	taxonomic classification defined by topology and ANI	classification based on placement in class-level tree	GCA_900473045.1, s__Pararhizobium sp900473045, 95.0, 90.14, 0.851; GCA_024426085.1, s__Pararhizobium sp024426085, 95.0, 89.04, 0.855; GCA_900473685.1, s__Pararhizobium sp900473685, 95.0, 88.57, 0.845; GCF_001426665.1, s__Pararhizobium sp001426665, 95.0, 88.47, 0.862; GCA_900472175.1, s__Pararhizobium sp900472175, 95.0, 88.29, 0.832; GCF_001426685.1, s__Pararhizobium sp001426685, 95.0, 88.12, 0.80…	95.69	11	0.99802	Genome not assigned to closest species as it falls outside its pre-defined ANI radius
SM1028_bin.12	d__Bacteria;p__Gemmatimonadota;c__Gemmatimonadetes;o__Gemmatimonadales;f__Gemmatimonadaceae;g__;s__	N/A	N/A	N/A	N/A	N/A	N/A	N/A	N/A	N/A	N/A	d__Bacteria;p__Gemmatimonadota;c__Gemmatimonadetes;o__Gemmatimonadales;f__Gemmatimonadaceae;g__;s__	taxonomic novelty determined using RED	classification based on placement in class-level tree	N/A	41.81	11	0.88822	N/A
SM1028_bin.13	d__Bacteria;p__Pseudomonadota;c__Alphaproteobacteria;o__Rhizobiales;f__Rhizobiaceae;g__Phyllobacterium;s__	N/A	N/A	N/A	N/A	N/A	N/A	N/A	N/A	N/A	N/A	d__Bacteria;p__Pseudomonadota;c__Alphaproteobacteria;o__Rhizobiales;f__Rhizobiaceae;g__Phyllobacterium;s__	taxonomic classification defined by topology and ANI	classification based on placement in class-level tree	GCF_014192095.1, s__Phyllobacterium trifolii, 95.0, 91.03, 0.861; GCF_020164455.1, s__Phyllobacterium sp020164455, 95.0, 90.98, 0.857; GCF_003337575.1, s__Phyllobacterium bourgognense, 95.0, 90.84, 0.87; GCF_003010935.1, s__Phyllobacterium endophyticum, 95.0, 81.8, 0.672; GCF_003010955.1, s__Phyllobacterium brassicacearum, 95.0, 81.32, 0.602; GCF_002764115.1, s__Phyllobacterium zundukense, 95.0, …	61.91	11	0.99353	Genome not assigned to closest species as it falls outside its pre-defined ANI radius
SM1028_bin.15	d__Bacteria;p__Gemmatimonadota;c__Gemmatimonadetes;o__Gemmatimonadales;f__Gemmatimonadaceae;g__Fen-1231;s__	N/A	N/A	N/A	N/A	N/A	GCA_014192065.1	95	d__Bacteria;p__Gemmatimonadota;c__Gemmatimonadetes;o__Gemmatimonadales;f__Gemmatimonadaceae;g__Fen-1231;s__Fen-1231 sp014192065	77.69	0.379	d__Bacteria;p__Gemmatimonadota;c__Gemmatimonadetes;o__Gemmatimonadales;f__Gemmatimonadaceae;g__Fen-1231;s__	taxonomic classification defined by topology and ANI	classification based on placement in class-level tree	GCA_016874035.1, s__Fen-1231 sp016874035, 95.0, 78.31, 0.348; GCA_016194585.1, s__Fen-1231 sp016194585, 95.0, 77.77, 0.27; GCA_017881585.1, s__Fen-1231 sp017881585, 95.0, 77.53, 0.274; GCA_020851455.1, s__Fen-1231 sp020851455, 95.0, 77.38, 0.287; GCA_903876745.1, s__Fen-1231 sp903876745, 95.0, 77.34, 0.211; GCA_003171215.1, s__Fen-1231 sp003171215, 95.0, 77.32, 0.223; GCA_903882745.1, s__Fen-1231…	62.3	11	0.92617	N/A
SM1028_bin.16	d__Bacteria;p__Gemmatimonadota;c__Gemmatimonadetes;o__Gemmatimonadales;f__Gemmatimonadaceae;g__;s__	N/A	N/A	N/A	N/A	N/A	N/A	N/A	N/A	N/A	N/A	d__Bacteria;p__Gemmatimonadota;c__Gemmatimonadetes;o__Gemmatimonadales;f__Gemmatimonadaceae;g__;s__	taxonomic novelty determined using RED	classification based on placement in class-level tree	N/A	45.06	11	0.88352	N/A
SM1028_bin.17	d__Bacteria;p__Pseudomonadota;c__Alphaproteobacteria;o__Sphingomonadales;f__Sphingomonadaceae;g__Allosphingosinicella;s__	N/A	N/A	N/A	N/A	N/A	GCF_004151485.1	95	d__Bacteria;p__Pseudomonadota;c__Alphaproteobacteria;o__Sphingomonadales;f__Sphingomonadaceae;g__Allosphingosinicella;s__Allosphingosinicella sp004151485	80.77	0.696	d__Bacteria;p__Pseudomonadota;c__Alphaproteobacteria;o__Sphingomonadales;f__Sphingomonadaceae;g__Allosphingosinicella;s__	taxonomic classification defined by topology and ANI	classification based on placement in class-level tree	GCA_003347635.1, s__Allosphingosinicella sp003347635, 95.0, 81.38, 0.786; GCA_019239785.1, s__Allosphingosinicella sp019239785, 95.0, 80.95, 0.627; GCA_005883305.1, s__Allosphingosinicella sp005883305, 95.0, 80.47, 0.677; GCA_019635535.1, s__Allosphingosinicella sp019635535, 95.0, 80.47, 0.667; GCF_011320075.1, s__Allosphingosinicella sp011320075, 95.0, 80.21, 0.627; GCF_007995055.1, s__Allosphin…	41.39	11	0.96442	Genome not assigned to closest species as it falls outside its pre-defined ANI radius
SM1028_bin.18	d__Bacteria;p__Actinomycetota;c__Acidimicrobiia;o__IMCC26256;f__VFJJ01;g__;s__	N/A	N/A	N/A	N/A	N/A	GCA_009886115.1	95	d__Bacteria;p__Actinomycetota;c__Acidimicrobiia;o__IMCC26256;f__VFJJ01;g__VFJJ01;s__VFJJ01 sp009886115	76.02	0.209	d__Bacteria;p__Actinomycetota;c__Acidimicrobiia;o__IMCC26256;f__VFJJ01;g__;s__	taxonomic classification defined by topology and ANI	classification based on placement in class-level tree	N/A	66.67	11	0.69025	N/A
SM1028_bin.19	d__Bacteria;p__Chloroflexota;c__Limnocylindria;o__P2-11E;f__P2-11E;g__CF-39;s__	N/A	N/A	N/A	N/A	N/A	GCA_005887995.1	95	d__Bacteria;p__Chloroflexota;c__Limnocylindria;o__P2-11E;f__P2-11E;g__CF-39;s__CF-39 sp005887995	80.53	0.575	d__Bacteria;p__Chloroflexota;c__Limnocylindria;o__P2-11E;f__P2-11E;g__CF-39;s__	taxonomic classification defined by topology and ANI	classification based on placement in class-level tree	GCA_005882255.1, s__CF-39 sp005882255, 95.0, 79.35, 0.422; GCA_005889405.1, s__CF-39 sp005889405, 95.0, 79.2, 0.48	46.16	11	0.93014	Genome not assigned to closest species as it falls outside its pre-defined ANI radius
SM1028_bin.2	d__Bacteria;p__Actinomycetota;c__Thermoleophilia;o__Gaiellales;f__Gaiellaceae;g__;s__	N/A	N/A	N/A	N/A	N/A	N/A	N/A	N/A	N/A	N/A	d__Bacteria;p__Actinomycetota;c__Thermoleophilia;o__Gaiellales;f__Gaiellaceae;g__;s__	taxonomic classification fully defined by topology	classification based on placement in class-level tree	N/A	40	11	0.85417	N/A
SM1028_bin.22	d__Bacteria;p__Pseudomonadota;c__Gammaproteobacteria;o__Burkholderiales;f__SG8-39;g__SCGC-AG-212-J23;s__	N/A	N/A	N/A	N/A	N/A	GCA_001644455.1	95	d__Bacteria;p__Pseudomonadota;c__Gammaproteobacteria;o__Burkholderiales;f__SG8-39;g__SCGC-AG-212-J23;s__SCGC-AG-212-J23 sp001644455	81.57	0.535	d__Bacteria;p__Pseudomonadota;c__Gammaproteobacteria;o__Burkholderiales;f__SG8-39;g__SCGC-AG-212-J23;s__	taxonomic classification defined by topology and ANI	classification based on placement in class-level tree	GCA_001772055.1, s__SCGC-AG-212-J23 sp001772055, 95.0, 82.66, 0.606; GCA_005888925.1, s__SCGC-AG-212-J23 sp005888925, 95.0, 81.07, 0.501; GCA_005881595.1, s__SCGC-AG-212-J23 sp005881595, 95.0, 80.89, 0.52; GCA_004297625.1, s__SCGC-AG-212-J23 sp004297625, 95.0, 80.53, 0.594; GCA_005883675.1, s__SCGC-AG-212-J23 sp005883675, 95.0, 80.44, 0.536; GCA_019509895.1, s__SCGC-AG-212-J23 sp019509895, 95.0, …	78.37	11	0.95836	Genome not assigned to closest species as it falls outside its pre-defined ANI radius
SM1028_bin.24	d__Bacteria;p__Planctomycetota;c__Planctomycetia;o__Gemmatales;f__Gemmataceae;g__RGDT01;s__	N/A	N/A	N/A	N/A	N/A	GCA_009918525.1	95	d__Bacteria;p__Planctomycetota;c__Planctomycetia;o__Gemmatales;f__Gemmataceae;g__RGDT01;s__RGDT01 sp009918525	76.28	0.066	d__Bacteria;p__Planctomycetota;c__Planctomycetia;o__Gemmatales;f__Gemmataceae;g__RGDT01;s__	taxonomic classification defined by topology and ANI	classification based on placement in class-level tree	N/A	39.13	11	0.91232	N/A
SM1028_bin.26	d__Bacteria;p__Pseudomonadota;c__Gammaproteobacteria;o__DSM-16500;f__DSM-16500;g__;s__	N/A	N/A	N/A	N/A	N/A	N/A	N/A	N/A	N/A	N/A	d__Bacteria;p__Pseudomonadota;c__Gammaproteobacteria;o__DSM-16500;f__DSM-16500;g__;s__	taxonomic novelty determined using RED	classification based on placement in class-level tree	N/A	94.26	11	0.82702	N/A
SM1028_bin.3	d__Bacteria;p__Pseudomonadota;c__Gammaproteobacteria;o__Burkholderiales;f__SG8-39;g__SCGC-AG-212-J23;s__	N/A	N/A	N/A	N/A	N/A	GCA_001644455.1	95	d__Bacteria;p__Pseudomonadota;c__Gammaproteobacteria;o__Burkholderiales;f__SG8-39;g__SCGC-AG-212-J23;s__SCGC-AG-212-J23 sp001644455	80.39	0.538	d__Bacteria;p__Pseudomonadota;c__Gammaproteobacteria;o__Burkholderiales;f__SG8-39;g__SCGC-AG-212-J23;s__	taxonomic classification defined by topology and ANI	classification based on placement in class-level tree	GCA_001772055.1, s__SCGC-AG-212-J23 sp001772055, 95.0, 81.17, 0.614; GCA_005888925.1, s__SCGC-AG-212-J23 sp005888925, 95.0, 80.17, 0.484; GCA_005883675.1, s__SCGC-AG-212-J23 sp005883675, 95.0, 80.1, 0.498; GCA_004297625.1, s__SCGC-AG-212-J23 sp004297625, 95.0, 80.02, 0.532; GCA_005881595.1, s__SCGC-AG-212-J23 sp005881595, 95.0, 79.99, 0.463; GCA_019509895.1, s__SCGC-AG-212-J23 sp019509895, 95.0, …	69.71	11	0.95545	Genome not assigned to closest species as it falls outside its pre-defined ANI radius
SM1028_bin.30	d__Bacteria;p__Pseudomonadota;c__Gammaproteobacteria;o__DSM-16500;f__DSM-16500;g__UBA5158;s__	N/A	N/A	N/A	N/A	N/A	GCA_013286085.1	95	d__Bacteria;p__Pseudomonadota;c__Gammaproteobacteria;o__DSM-16500;f__DSM-16500;g__UBA5158;s__UBA5158 sp013286085	76.48	0.098	d__Bacteria;p__Pseudomonadota;c__Gammaproteobacteria;o__DSM-16500;f__DSM-16500;g__UBA5158;s__	taxonomic classification defined by topology and ANI	classification based on placement in class-level tree	GCA_903970525.1, s__UBA5158 sp903970525, 95.0, 76.48, 0.096; GCA_013288815.1, s__UBA5158 sp013288815, 95.0, 76.3, 0.102; GCA_002413665.1, s__UBA5158 sp002413665, 95.0, 76.28, 0.098	75.67	11	0.9139	N/A
SM1028_bin.31	d__Bacteria;p__Pseudomonadota;c__Alphaproteobacteria;o__Caulobacterales;f__Caulobacteraceae;g__;s__	N/A	N/A	N/A	N/A	N/A	N/A	N/A	N/A	N/A	N/A	d__Bacteria;p__Pseudomonadota;c__Alphaproteobacteria;o__Caulobacterales;f__Caulobacteraceae;g__;s__	taxonomic novelty determined using RED	classification based on placement in class-level tree	N/A	49.47	11	0.90121	N/A
SM1028_bin.32	d__Bacteria;p__Pseudomonadota;c__Gammaproteobacteria;o__Burkholderiales;f__Burkholderiaceae_B;g__Ramlibacter;s__	N/A	N/A	N/A	N/A	N/A	GCA_013815685.1	95	d__Bacteria;p__Pseudomonadota;c__Gammaproteobacteria;o__Burkholderiales;f__Burkholderiaceae_B;g__Ramlibacter;s__Ramlibacter sp013815685	82.08	0.644	d__Bacteria;p__Pseudomonadota;c__Gammaproteobacteria;o__Burkholderiales;f__Burkholderiaceae_B;g__Ramlibacter;s__	taxonomic classification defined by topology and ANI	classification based on placement in class-level tree	GCF_013155545.1, s__Ramlibacter soli, 95.0, 84.95, 0.787; GCA_016191525.1, s__Ramlibacter sp016191525, 95.0, 81.62, 0.631; GCF_003797765.1, s__Ramlibacter sp003797765, 95.0, 81.62, 0.695; GCF_000215705.1, s__Ramlibacter tataouinensis, 95.0, 81.44, 0.6; GCA_022844525.1, s__Ramlibacter sp022844525, 95.0, 81.29, 0.48; GCF_001580455.1, s__Ramlibacter tataouinensis_B, 95.0, 81.11, 0.584; GCF_013087525…	57.06	11	0.9824	Genome not assigned to closest species as it falls outside its pre-defined ANI radius
SM1028_bin.33	d__Bacteria;p__Pseudomonadota;c__Alphaproteobacteria;o__Rhizobiales;f__Xanthobacteraceae;g__Pseudorhodoplanes;s__	N/A	N/A	N/A	N/A	N/A	N/A	N/A	N/A	N/A	N/A	d__Bacteria;p__Pseudomonadota;c__Alphaproteobacteria;o__Rhizobiales;f__Xanthobacteraceae;g__Pseudorhodoplanes;s__	taxonomic classification defined by topology and ANI	classification based on placement in class-level tree	GCA_019187085.1, s__Pseudorhodoplanes sp019187085, 95.0, 79.71, 0.543; GCA_022843165.1, s__Pseudorhodoplanes sp022843165, 95.0, 79.53, 0.519; GCA_013388965.1, s__Pseudorhodoplanes sp013388965, 95.0, 79.46, 0.481; GCA_008933495.1, s__Pseudorhodoplanes sp008933495, 95.0, 79.39, 0.386; GCA_023430245.1, s__Pseudorhodoplanes sp023430245, 95.0, 78.42, 0.306; GCA_023387555.1, s__Pseudorhodoplanes sp0233…	38.97	11	0.95016	Genome not assigned to closest species as it falls outside its pre-defined ANI radius
SM1028_bin.35	d__Bacteria;p__Planctomycetota;c__Planctomycetia;o__Pirellulales;f__Pirellulaceae;g__CAIPEB01;s__	N/A	N/A	N/A	N/A	N/A	GCA_903863885.1	95	d__Bacteria;p__Planctomycetota;c__Planctomycetia;o__Pirellulales;f__Pirellulaceae;g__CAIPEB01;s__CAIPEB01 sp903863885	75.05	0.017	d__Bacteria;p__Planctomycetota;c__Planctomycetia;o__Pirellulales;f__Pirellulaceae;g__CAIPEB01;s__	taxonomic classification defined by topology and ANI	classification based on placement in class-level tree	N/A	40.1	11	0.85707	N/A
SM1028_bin.36	d__Bacteria;p__Gemmatimonadota;c__Gemmatimonadetes;o__Longimicrobiales;f__RSA9;g__;s__	N/A	N/A	N/A	N/A	N/A	N/A	N/A	N/A	N/A	N/A	d__Bacteria;p__Gemmatimonadota;c__Gemmatimonadetes;o__Longimicrobiales;f__RSA9;g__;s__	taxonomic classification fully defined by topology	classification based on placement in class-level tree	N/A	62.9	11	0.78181	N/A
SM1028_bin.37	d__Bacteria;p__Gemmatimonadota;c__Gemmatimonadetes;o__Gemmatimonadales;f__Gemmatimonadaceae;g__;s__	N/A	N/A	N/A	N/A	N/A	N/A	N/A	N/A	N/A	N/A	d__Bacteria;p__Gemmatimonadota;c__Gemmatimonadetes;o__Gemmatimonadales;f__Gemmatimonadaceae;g__;s__	taxonomic novelty determined using RED	classification based on placement in class-level tree	N/A	59.07	11	0.88089	N/A
SM1028_bin.38	d__Bacteria;p__Chloroflexota;c__Limnocylindria;o__QHBO01;f__QHBO01;g__JACDBZ01;s__	N/A	N/A	N/A	N/A	N/A	GCA_013694645.1	95	d__Bacteria;p__Chloroflexota;c__Limnocylindria;o__QHBO01;f__QHBO01;g__JACDBZ01;s__JACDBZ01 sp013694645	80.55	0.603	d__Bacteria;p__Chloroflexota;c__Limnocylindria;o__QHBO01;f__QHBO01;g__JACDBZ01;s__	taxonomic classification defined by topology and ANI	classification based on placement in class-level tree	GCA_013697395.1, s__JACDBZ01 sp013697395, 95.0, 80.6, 0.517; GCA_024636135.1, s__JACDBZ01 sp024636135, 95.0, 80.41, 0.543; GCA_013694795.1, s__JACDBZ01 sp013694795, 95.0, 80.24, 0.599; GCA_013820865.1, s__JACDBZ01 sp013820865, 95.0, 79.35, 0.458; GCA_020848055.1, s__JACDBZ01 sp020848055, 95.0, 79.28, 0.394; GCA_019348395.1, s__JACDBZ01 sp019348395, 95.0, 78.98, 0.525	78.45	11	0.94969	Genome not assigned to closest species as it falls outside its pre-defined ANI radius
SM1028_bin.4	d__Bacteria;p__Acidobacteriota;c__Vicinamibacteria;o__Vicinamibacterales;f__UBA2999;g__12-FULL-67-14b;s__	N/A	N/A	N/A	N/A	N/A	N/A	N/A	N/A	N/A	N/A	d__Bacteria;p__Acidobacteriota;c__Vicinamibacteria;o__Vicinamibacterales;f__UBA2999;g__12-FULL-67-14b;s__	taxonomic classification defined by topology and ANI	classification based on placement in class-level tree	GCA_019752015.1, s__12-FULL-67-14b sp019752015, 95.0, 79.77, 0.541; GCA_016871275.1, s__12-FULL-67-14b sp016871275, 95.0, 79.24, 0.383; GCA_001768615.1, s__12-FULL-67-14b sp001768615, 95.0, 79.11, 0.447; GCA_009694735.1, s__12-FULL-67-14b sp009694735, 95.0, 78.71, 0.315; GCA_945866285.1, s__12-FULL-67-14b sp945866285, 95.0, 78.59, 0.332; GCA_021730945.1, s__12-FULL-67-14b sp021730945, 95.0, 78.56…	37.26	11	0.9405	Genome not assigned to closest species as it falls outside its pre-defined ANI radius
SM1028_bin.40	d__Bacteria;p__Acidobacteriota;c__Vicinamibacteria;o__Vicinamibacterales;f__2-12-FULL-66-21;g__;s__	N/A	N/A	N/A	N/A	N/A	N/A	N/A	N/A	N/A	N/A	d__Bacteria;p__Acidobacteriota;c__Vicinamibacteria;o__Vicinamibacterales;f__2-12-FULL-66-21;g__;s__	taxonomic classification fully defined by topology	classification based on placement in class-level tree	N/A	52.17	11	0.81582	N/A
SM1028_bin.5	d__Bacteria;p__Pseudomonadota;c__Alphaproteobacteria;o__Caulobacterales;f__Caulobacteraceae;g__;s__	N/A	N/A	N/A	N/A	N/A	N/A	N/A	N/A	N/A	N/A	d__Bacteria;p__Pseudomonadota;c__Alphaproteobacteria;o__Caulobacterales;f__Caulobacteraceae;g__;s__	taxonomic novelty determined using RED	classification based on placement in class-level tree	N/A	90.86	11	0.90145	N/A
SM1028_bin.6	d__Bacteria;p__Planctomycetota;c__Planctomycetia;o__Gemmatales;f__Gemmataceae;g__;s__	N/A	N/A	N/A	N/A	N/A	N/A	N/A	N/A	N/A	N/A	d__Bacteria;p__Planctomycetota;c__Planctomycetia;o__Gemmatales;f__Gemmataceae;g__;s__	taxonomic classification fully defined by topology	classification based on placement in class-level tree	N/A	33.86	11	0.86269	N/A
SM1028_bin.7	d__Bacteria;p__Acidobacteriota;c__Vicinamibacteria;o__Fen-336;f__Fen-336;g__AA29;s__	N/A	N/A	N/A	N/A	N/A	GCA_003222295.1	95	d__Bacteria;p__Acidobacteriota;c__Vicinamibacteria;o__Fen-336;f__Fen-336;g__AA29;s__AA29 sp003222295	78.33	0.351	d__Bacteria;p__Acidobacteriota;c__Vicinamibacteria;o__Fen-336;f__Fen-336;g__AA29;s__	taxonomic classification defined by topology and ANI	classification based on placement in class-level tree	N/A	71.56	11	0.86673	N/A
SM1028_bin.9	d__Bacteria;p__Pseudomonadota;c__Gammaproteobacteria;o__Burkholderiales;f__Burkholderiaceae_B;g__JAEUPI01;s__	N/A	N/A	N/A	N/A	N/A	N/A	N/A	N/A	N/A	N/A	d__Bacteria;p__Pseudomonadota;c__Gammaproteobacteria;o__Burkholderiales;f__Burkholderiaceae_B;g__JAEUPI01;s__	taxonomic classification defined by topology and ANI	classification based on placement in class-level tree	GCA_022072045.1, s__JAEUPI01 sp022072045, 95.0, 83.16, 0.504; GCA_015075165.1, s__JAEUPI01 sp015075165, 95.0, 83.07, 0.586; GCA_015075545.1, s__JAEUPI01 sp008933545, 95.0, 82.83, 0.5; GCA_016790175.1, s__JAEUPI01 sp016790175, 95.0, 80.81, 0.436	59.3	11	0.97886	Genome not assigned to closest species as it falls outside its pre-defined ANI radius
SM1030_bin.1	d__Bacteria;p__Pseudomonadota;c__Gammaproteobacteria;o__Burkholderiales;f__Burkholderiaceae_B;g__PBB1;s__	N/A	N/A	N/A	N/A	N/A	N/A	N/A	N/A	N/A	N/A	d__Bacteria;p__Pseudomonadota;c__Gammaproteobacteria;o__Burkholderiales;f__Burkholderiaceae_B;g__PBB1;s__	taxonomic novelty determined using RED	classification based on placement in class-level tree	N/A	67.53	11	0.95144	N/A
SM1030_bin.12	d__Bacteria;p__Planctomycetota;c__JAJSAM01;o__JAKLKS01;f__JAKLKS01;g__JAKLKS01;s__	N/A	N/A	N/A	N/A	N/A	GCA_023150535.1	95	d__Bacteria;p__Planctomycetota;c__JAJSAM01;o__JAKLKS01;f__JAKLKS01;g__JAKLKS01;s__JAKLKS01 sp023150535	79.43	0.485	d__Bacteria;p__Planctomycetota;c__JAJSAM01;o__JAKLKS01;f__JAKLKS01;g__JAKLKS01;s__	taxonomic classification defined by topology and ANI	classification based on placement in class-level tree	N/A	85.32	11	0.88214	N/A
SM1030_bin.17	d__Bacteria;p__Patescibacteria;c__Gracilibacteria;o__UBA1369;f__UBA1369;g__PALSA-1335;s__	N/A	N/A	N/A	N/A	N/A	GCA_003153355.1	95	d__Bacteria;p__Patescibacteria;c__Gracilibacteria;o__UBA1369;f__UBA1369;g__PALSA-1335;s__PALSA-1335 sp003153355	76.44	0.056	d__Bacteria;p__Patescibacteria;c__Gracilibacteria;o__UBA1369;f__UBA1369;g__PALSA-1335;s__	taxonomic classification defined by topology and ANI	classification based on placement in class-level tree	N/A	83.5	11	0.86813	N/A
SM1030_bin.18	d__Bacteria;p__Patescibacteria;c__Paceibacteria;o__2-02-FULL-40-12;f__GWA2-44-9;g__;s__	N/A	N/A	N/A	N/A	N/A	N/A	N/A	N/A	N/A	N/A	d__Bacteria;p__Patescibacteria;c__Paceibacteria;o__2-02-FULL-40-12;f__GWA2-44-9;g__;s__	taxonomic novelty determined using RED	classification based on placement in class-level tree	N/A	67.49	11	0.75798	N/A
SM1030_bin.19	d__Bacteria;p__Chloroflexota;c__FW602-bin22;o__FW602-bin22;f__FW602-bin22;g__;s__	N/A	N/A	N/A	N/A	N/A	N/A	N/A	N/A	N/A	N/A	d__Bacteria;p__Chloroflexota;c__FW602-bin22;o__FW602-bin22;f__FW602-bin22;g__;s__	taxonomic novelty determined using RED	classification based on placement in class-level tree	N/A	54.1	11	0.77028	N/A
SM1030_bin.2	d__Bacteria;p__Verrucomicrobiota;c__Verrucomicrobiae;o__Pedosphaerales;f__JACPZS01;g__;s__	N/A	N/A	N/A	N/A	N/A	GCA_016195385.1	95	d__Bacteria;p__Verrucomicrobiota;c__Verrucomicrobiae;o__Pedosphaerales;f__JACPZS01;g__JACPZS01;s__JACPZS01 sp016195385	75.65	0.056	d__Bacteria;p__Verrucomicrobiota;c__Verrucomicrobiae;o__Pedosphaerales;f__JACPZS01;g__;s__	taxonomic classification defined by topology and ANI	classification based on placement in class-level tree	N/A	61.79	11	0.78693	N/A
SM1030_bin.20	d__Bacteria;p__Planctomycetota;c__Planctomycetia;o__Gemmatales;f__Gemmataceae;g__;s__	N/A	N/A	N/A	N/A	N/A	N/A	N/A	N/A	N/A	N/A	d__Bacteria;p__Planctomycetota;c__Planctomycetia;o__Gemmatales;f__Gemmataceae;g__;s__	taxonomic classification fully defined by topology	classification based on placement in class-level tree	N/A	63.97	11	0.81213	N/A
SM1030_bin.21	d__Bacteria;p__Pseudomonadota;c__Gammaproteobacteria;o__Burkholderiales;f__Burkholderiaceae_B;g__;s__	N/A	N/A	N/A	N/A	N/A	N/A	N/A	N/A	N/A	N/A	d__Bacteria;p__Pseudomonadota;c__Gammaproteobacteria;o__Burkholderiales;f__Burkholderiaceae_B;g__;s__	taxonomic classification fully defined by topology	classification based on placement in class-level tree	N/A	74.96	11	0.91052	N/A
SM1030_bin.22	d__Bacteria;p__Actinomycetota;c__Acidimicrobiia;o__IMCC26256;f__VFJJ01;g__;s__	N/A	N/A	N/A	N/A	N/A	GCA_009886115.1	95	d__Bacteria;p__Actinomycetota;c__Acidimicrobiia;o__IMCC26256;f__VFJJ01;g__VFJJ01;s__VFJJ01 sp009886115	76.15	0.152	d__Bacteria;p__Actinomycetota;c__Acidimicrobiia;o__IMCC26256;f__VFJJ01;g__;s__	taxonomic classification defined by topology and ANI	classification based on placement in class-level tree	N/A	83.34	11	0.69718	N/A
SM1030_bin.23	d__Bacteria;p__Chloroflexota;c__Limnocylindria;o__P2-11E;f__P2-11E;g__CF-39;s__	N/A	N/A	N/A	N/A	N/A	N/A	N/A	N/A	N/A	N/A	d__Bacteria;p__Chloroflexota;c__Limnocylindria;o__P2-11E;f__P2-11E;g__CF-39;s__	taxonomic classification defined by topology and ANI	classification based on placement in class-level tree	GCA_005882255.1, s__CF-39 sp005882255, 95.0, 80.7, 0.566; GCA_005889405.1, s__CF-39 sp005889405, 95.0, 80.59, 0.656; GCA_005887995.1, s__CF-39 sp005887995, 95.0, 79.46, 0.588	37	11	0.92812	Genome not assigned to closest species as it falls outside its pre-defined ANI radius
SM1030_bin.24	d__Bacteria;p__Chlamydiota;c__Chlamydiia;o__Chlamydiales;f__SM23-39;g__2-02-FULL-45-22_A;s__	N/A	N/A	N/A	N/A	N/A	GCA_002773795.1	95	d__Bacteria;p__Chlamydiota;c__Chlamydiia;o__Chlamydiales;f__SM23-39;g__2-02-FULL-45-22_A;s__2-02-FULL-45-22_A sp002773795	76.85	0.122	d__Bacteria;p__Chlamydiota;c__Chlamydiia;o__Chlamydiales;f__SM23-39;g__2-02-FULL-45-22_A;s__	taxonomic classification defined by topology and ANI	classification based on placement in class-level tree	N/A	73.84	11	0.91749	N/A
SM1030_bin.25	d__Bacteria;p__Bacteroidota;c__Bacteroidia;o__AKYH767-A;f__JAHEYN01;g__;s__	N/A	N/A	N/A	N/A	N/A	GCA_023251555.1	95	d__Bacteria;p__Bacteroidota;c__Bacteroidia;o__AKYH767-A;f__JAHEYN01;g__JAHEYN01;s__JAHEYN01 sp023251555	75.01	0.019	d__Bacteria;p__Bacteroidota;c__Bacteroidia;o__AKYH767-A;f__JAHEYN01;g__;s__	taxonomic classification defined by topology and ANI	classification based on placement in class-level tree	N/A	60.32	11	0.75847	N/A
SM1030_bin.26	d__Bacteria;p__Acidobacteriota;c__Vicinamibacteria;o__Vicinamibacterales;f__UBA2999;g__;s__	N/A	N/A	N/A	N/A	N/A	N/A	N/A	N/A	N/A	N/A	d__Bacteria;p__Acidobacteriota;c__Vicinamibacteria;o__Vicinamibacterales;f__UBA2999;g__;s__	taxonomic novelty determined using RED	classification based on placement in class-level tree	N/A	73.33	11	0.89707	N/A
SM1030_bin.27	d__Bacteria;p__Gemmatimonadota;c__Gemmatimonadetes;o__Longimicrobiales;f__RSA9;g__;s__	N/A	N/A	N/A	N/A	N/A	N/A	N/A	N/A	N/A	N/A	d__Bacteria;p__Gemmatimonadota;c__Gemmatimonadetes;o__Longimicrobiales;f__RSA9;g__;s__	taxonomic classification fully defined by topology	classification based on placement in class-level tree	N/A	63	11	0.78429	N/A
SM1030_bin.28	d__Bacteria;p__Patescibacteria;c__Paceibacteria;o__UBA9983_A;f__UBA5272;g__UBA11704;s__	N/A	N/A	N/A	N/A	N/A	GCA_943354975.1	95	d__Bacteria;p__Patescibacteria;c__Paceibacteria;o__UBA9983_A;f__UBA5272;g__UBA11704;s__UBA11704 sp943354975	77.82	0.226	d__Bacteria;p__Patescibacteria;c__Paceibacteria;o__UBA9983_A;f__UBA5272;g__UBA11704;s__	taxonomic classification defined by topology and ANI	classification based on placement in class-level tree	GCA_023267595.1, s__UBA11704 sp023267595, 95.0, 78.36, 0.27; GCA_021734745.1, s__UBA11704 sp021734745, 95.0, 78.35, 0.138; GCA_018062965.1, s__UBA11704 sp018062965, 95.0, 78.25, 0.115; GCA_903834855.1, s__UBA11704 sp903834855, 95.0, 77.97, 0.195; GCA_023267535.1, s__UBA11704 sp023267535, 95.0, 77.69, 0.126; GCA_023267635.1, s__UBA11704 sp023267635, 95.0, 77.38, 0.126; GCA_023267555.1, s__UBA11704…	57.58	11	0.96013	N/A
SM1030_bin.29	d__Bacteria;p__Pseudomonadota;c__Gammaproteobacteria;o__Burkholderiales;f__Burkholderiaceae_B;g__Rhodoferax;s__	N/A	N/A	N/A	N/A	N/A	GCA_021731215.1	95	d__Bacteria;p__Pseudomonadota;c__Gammaproteobacteria;o__Burkholderiales;f__Burkholderiaceae_B;g__Rhodoferax;s__Rhodoferax sp021731215	82.74	0.638	d__Bacteria;p__Pseudomonadota;c__Gammaproteobacteria;o__Burkholderiales;f__Burkholderiaceae_B;g__Rhodoferax;s__	taxonomic classification defined by topology and ANI	classification based on placement in class-level tree	GCF_003347515.1, s__Rhodoferax sp003347515, 95.0, 82.84, 0.611; GCA_002413825.1, s__Rhodoferax sp002413825, 95.0, 82.19, 0.568; GCA_002422455.1, s__Rhodoferax sp002422455, 95.0, 81.28, 0.618; GCA_012927445.1, s__Rhodoferax sp012927445, 95.0, 81.28, 0.505; GCA_903828665.1, s__Rhodoferax sp903828665, 95.0, 80.73, 0.465; GCA_903876735.1, s__Rhodoferax sp903876735, 95.0, 80.43, 0.425; GCF_000013605.1…	88.2	11	0.97771	Genome not assigned to closest species as it falls outside its pre-defined ANI radius
SM1030_bin.3	d__Bacteria;p__Armatimonadota;c__SYMT01;o__SYMT01;f__SYMT01;g__;s__	N/A	N/A	N/A	N/A	N/A	GCA_020696885.1	95	d__Bacteria;p__Armatimonadota;c__SYMT01;o__SYMT01;f__SYMT01;g__JAJFMS01;s__JAJFMS01 sp020696885	76.9	0.211	d__Bacteria;p__Armatimonadota;c__SYMT01;o__SYMT01;f__SYMT01;g__;s__	taxonomic classification defined by topology and ANI	classification based on placement in class-level tree	N/A	83.48	11	0.8183	N/A
SM1030_bin.30	d__Bacteria;p__Chlamydiota;c__Chlamydiia;o__Chlamydiales;f__SM23-39;g__;s__	N/A	N/A	N/A	N/A	N/A	N/A	N/A	N/A	N/A	N/A	d__Bacteria;p__Chlamydiota;c__Chlamydiia;o__Chlamydiales;f__SM23-39;g__;s__	taxonomic classification fully defined by topology	classification based on placement in class-level tree	N/A	81.19	11	0.87451	N/A
SM1030_bin.31	d__Bacteria;p__Patescibacteria;c__Paceibacteria;o__UBA9983_A;f__UBA5272;g__JALHNF01;s__	N/A	N/A	N/A	N/A	N/A	GCA_022843645.1	95	d__Bacteria;p__Patescibacteria;c__Paceibacteria;o__UBA9983_A;f__UBA5272;g__JALHNF01;s__JALHNF01 sp022843645	78.34	0.276	d__Bacteria;p__Patescibacteria;c__Paceibacteria;o__UBA9983_A;f__UBA5272;g__JALHNF01;s__	taxonomic classification defined by topology and ANI	classification based on placement in class-level tree	N/A	62.84	11	0.93037	N/A
SM1030_bin.32	d__Bacteria;p__Verrucomicrobiota;c__Verrucomicrobiae;o__Pedosphaerales;f__SIBE01;g__SIBE01;s__	N/A	N/A	N/A	N/A	N/A	N/A	N/A	N/A	N/A	N/A	d__Bacteria;p__Verrucomicrobiota;c__Verrucomicrobiae;o__Pedosphaerales;f__SIBE01;g__SIBE01;s__	ANI	classification based on placement in class-level tree	GCA_945861765.1, s__SIBE01 sp945861765, 95.0, 77.31, 0.198; GCA_016871515.1, s__SIBE01 sp016871515, 95.0, 76.8, 0.159; GCA_009695265.1, s__SIBE01 sp009695265, 95.0, 76.8, 0.215	84.99	11	0.9002	N/A
SM1030_bin.33	d__Bacteria;p__Patescibacteria;c__Andersenbacteria;o__;f__;g__;s__	N/A	N/A	N/A	N/A	N/A	N/A	N/A	N/A	N/A	N/A	d__Bacteria;p__Patescibacteria;c__Andersenbacteria;o__;f__;g__;s__	taxonomic novelty determined using RED	classification based on placement in class-level tree	N/A	77.46	11	0.46048	N/A
SM1030_bin.34	d__Bacteria;p__Planctomycetota;c__Planctomycetia;o__Gemmatales;f__Gemmataceae;g__;s__	N/A	N/A	N/A	N/A	N/A	N/A	N/A	N/A	N/A	N/A	d__Bacteria;p__Planctomycetota;c__Planctomycetia;o__Gemmatales;f__Gemmataceae;g__;s__	taxonomic classification fully defined by topology	classification based on placement in class-level tree	N/A	52.39	11	0.77801	N/A
SM1030_bin.36	d__Bacteria;p__Pseudomonadota;c__Gammaproteobacteria;o__DSM-16500;f__DSM-16500;g__JABDGC01;s__	N/A	N/A	N/A	N/A	N/A	GCA_013286215.1	95	d__Bacteria;p__Pseudomonadota;c__Gammaproteobacteria;o__DSM-16500;f__DSM-16500;g__JABDGC01;s__JABDGC01 sp013286215	77.59	0.124	d__Bacteria;p__Pseudomonadota;c__Gammaproteobacteria;o__DSM-16500;f__DSM-16500;g__JABDGC01;s__	taxonomic classification defined by topology and ANI	classification based on placement in class-level tree	N/A	71.44	11	0.94214	N/A
SM1030_bin.37	d__Bacteria;p__Pseudomonadota;c__Gammaproteobacteria;o__Burkholderiales;f__Burkholderiaceae_B;g__Rhodoferax_A;s__	N/A	N/A	N/A	N/A	N/A	N/A	N/A	N/A	N/A	N/A	d__Bacteria;p__Pseudomonadota;c__Gammaproteobacteria;o__Burkholderiales;f__Burkholderiaceae_B;g__Rhodoferax_A;s__	taxonomic novelty determined using RED	classification based on placement in class-level tree	N/A	60.36	11	0.94848	N/A
SM1030_bin.38	d__Bacteria;p__Planctomycetota;c__JAJSAM01;o__JAKLKS01;f__JAJVHW01;g__;s__	N/A	N/A	N/A	N/A	N/A	N/A	N/A	N/A	N/A	N/A	d__Bacteria;p__Planctomycetota;c__JAJSAM01;o__JAKLKS01;f__JAJVHW01;g__;s__	taxonomic classification fully defined by topology	classification based on placement in class-level tree	N/A	44.37	11	0.79789	N/A
SM1030_bin.39	d__Bacteria;p__Bacteroidota;c__Bacteroidia;o__Cytophagales;f__Cyclobacteriaceae;g__ELB16-189;s__	N/A	N/A	N/A	N/A	N/A	N/A	N/A	N/A	N/A	N/A	d__Bacteria;p__Bacteroidota;c__Bacteroidia;o__Cytophagales;f__Cyclobacteriaceae;g__ELB16-189;s__	ANI	classification based on placement in class-level tree	GCA_020403045.1, s__ELB16-189 sp020403045, 95.0, 77.02, 0.011; GCA_013141055.1, s__ELB16-189 sp013141055, 95.0, 76.72, 0.027; GCA_015472025.1, s__ELB16-189 sp015472025, 95.0, 76.57, 0.023; GCA_016650355.1, s__ELB16-189 sp016650355, 95.0, 76.46, 0.016; GCA_016866235.1, s__ELB16-189 sp016866235, 95.0, 76.43, 0.022; GCA_020402945.1, s__ELB16-189 sp020402945, 95.0, 76.43, 0.013; GCA_018266435.1, s__E…	94.14	11	0.90822	N/A
SM1030_bin.4	d__Bacteria;p__Pseudomonadota;c__Gammaproteobacteria;o__Steroidobacterales;f__Steroidobacteraceae;g__ZC4RG30;s__	N/A	N/A	N/A	N/A	N/A	GCA_015655465.1	95	d__Bacteria;p__Pseudomonadota;c__Gammaproteobacteria;o__Steroidobacterales;f__Steroidobacteraceae;g__ZC4RG30;s__ZC4RG30 sp015655465	80.59	0.493	d__Bacteria;p__Pseudomonadota;c__Gammaproteobacteria;o__Steroidobacterales;f__Steroidobacteraceae;g__ZC4RG30;s__	taxonomic classification defined by topology and ANI	classification based on placement in class-level tree	GCA_016720075.1, s__ZC4RG30 sp016720075, 95.0, 79.91, 0.449; GCA_003242275.1, s__ZC4RG30 sp003242275, 95.0, 79.09, 0.403; GCA_903868595.1, s__ZC4RG30 sp903868595, 95.0, 77.98, 0.243; GCA_903908825.1, s__ZC4RG30 sp903908825, 95.0, 77.1, 0.187	73.05	11	0.96744	N/A
SM1030_bin.40	d__Bacteria;p__Patescibacteria;c__Paceibacteria;o__UBA9983_A;f__UBA12445;g__;s__	N/A	N/A	N/A	N/A	N/A	N/A	N/A	N/A	N/A	N/A	d__Bacteria;p__Patescibacteria;c__Paceibacteria;o__UBA9983_A;f__UBA12445;g__;s__	taxonomic novelty determined using RED	classification based on placement in class-level tree	N/A	33.37	11	0.90123	Genome has more than 10.0% of markers with multiple hits
SM1030_bin.41	d__Bacteria;p__Patescibacteria;c__Paceibacteria;o__UBA6257;f__WO2-01-48-18;g__;s__	N/A	N/A	N/A	N/A	N/A	GCA_001824435.1	95	d__Bacteria;p__Patescibacteria;c__Paceibacteria;o__UBA6257;f__WO2-01-48-18;g__WO2-01-48-18;s__WO2-01-48-18 sp001824435	77.74	0.01	d__Bacteria;p__Patescibacteria;c__Paceibacteria;o__UBA6257;f__WO2-01-48-18;g__;s__	taxonomic classification defined by topology and ANI	classification based on placement in class-level tree	N/A	68.12	11	0.79024	N/A
SM1030_bin.42	d__Bacteria;p__Gemmatimonadota;c__Gemmatimonadetes;o__Longimicrobiales;f__RSA9;g__;s__	N/A	N/A	N/A	N/A	N/A	N/A	N/A	N/A	N/A	N/A	d__Bacteria;p__Gemmatimonadota;c__Gemmatimonadetes;o__Longimicrobiales;f__RSA9;g__;s__	taxonomic classification fully defined by topology	classification based on placement in class-level tree	N/A	45.12	11	0.7775	N/A
SM1030_bin.43	d__Bacteria;p__Bacteroidota;c__Bacteroidia;o__NS11-12g;f__CAINMV01;g__CAINMV01;s__	N/A	N/A	N/A	N/A	N/A	N/A	N/A	N/A	N/A	N/A	d__Bacteria;p__Bacteroidota;c__Bacteroidia;o__NS11-12g;f__CAINMV01;g__CAINMV01;s__	taxonomic novelty determined using RED	classification based on placement in class-level tree	N/A	80.12	11	0.91734	N/A
SM1030_bin.44	d__Bacteria;p__Chlamydiota;c__Chlamydiia;o__Chlamydiales;f__Rhabdochlamydiaceae;g__;s__	N/A	N/A	N/A	N/A	N/A	N/A	N/A	N/A	N/A	N/A	d__Bacteria;p__Chlamydiota;c__Chlamydiia;o__Chlamydiales;f__Rhabdochlamydiaceae;g__;s__	taxonomic classification fully defined by topology	classification based on placement in class-level tree	N/A	83.59	11	0.77892	N/A
SM1030_bin.45	d__Bacteria;p__Myxococcota;c__UBA727;o__UBA727;f__JABDBI01;g__;s__	N/A	N/A	N/A	N/A	N/A	GCA_023248595.1	95	d__Bacteria;p__Myxococcota;c__UBA727;o__UBA727;f__JABDBI01;g__JAHFEG01;s__JAHFEG01 sp023248595	77.14	0.054	d__Bacteria;p__Myxococcota;c__UBA727;o__UBA727;f__JABDBI01;g__;s__	taxonomic classification defined by topology and ANI	classification based on placement in class-level tree	N/A	54.78	11	0.82037	N/A
SM1030_bin.48	d__Bacteria;p__Acidobacteriota;c__Terriglobia;o__20CM-2-55-15;f__20CM-2-55-15;g__JAHFTY01;s__	N/A	N/A	N/A	N/A	N/A	GCA_023265365.1	95	d__Bacteria;p__Acidobacteriota;c__Terriglobia;o__20CM-2-55-15;f__20CM-2-55-15;g__JAHFTY01;s__JAHFTY01 sp023265365	76.51	0.075	d__Bacteria;p__Acidobacteriota;c__Terriglobia;o__20CM-2-55-15;f__20CM-2-55-15;g__JAHFTY01;s__	taxonomic classification defined by topology and ANI	classification based on placement in class-level tree	N/A	67.01	11	0.89653	N/A
SM1030_bin.5	d__Bacteria;p__Pseudomonadota;c__Gammaproteobacteria;o__Burkholderiales;f__SG8-39;g__;s__	N/A	N/A	N/A	N/A	N/A	N/A	N/A	N/A	N/A	N/A	d__Bacteria;p__Pseudomonadota;c__Gammaproteobacteria;o__Burkholderiales;f__SG8-39;g__;s__	taxonomic novelty determined using RED	classification based on placement in class-level tree	N/A	61.21	11	0.85277	N/A
SM1030_bin.50	d__Bacteria;p__Patescibacteria;c__Andersenbacteria;o__;f__;g__;s__	N/A	N/A	N/A	N/A	N/A	N/A	N/A	N/A	N/A	N/A	d__Bacteria;p__Patescibacteria;c__Andersenbacteria;o__;f__;g__;s__	taxonomic novelty determined using RED	classification based on placement in class-level tree	N/A	77.18	11	0.46155	N/A
SM1030_bin.51	d__Bacteria;p__Planctomycetota;c__Planctomycetia;o__Gemmatales;f__Gemmataceae;g__JAIEPT01;s__	N/A	N/A	N/A	N/A	N/A	GCA_019748295.1	95	d__Bacteria;p__Planctomycetota;c__Planctomycetia;o__Gemmatales;f__Gemmataceae;g__JAIEPT01;s__JAIEPT01 sp019748295	76.45	0.138	d__Bacteria;p__Planctomycetota;c__Planctomycetia;o__Gemmatales;f__Gemmataceae;g__JAIEPT01;s__	taxonomic classification defined by topology and ANI	classification based on placement in class-level tree	N/A	72.89	11	0.87406	N/A
SM1030_bin.53	d__Bacteria;p__Acidobacteriota;c__Vicinamibacteria;o__Vicinamibacterales;f__UBA2999;g__JACCSI01;s__	N/A	N/A	N/A	N/A	N/A	GCA_013813075.1	95	d__Bacteria;p__Acidobacteriota;c__Vicinamibacteria;o__Vicinamibacterales;f__UBA2999;g__JACCSI01;s__JACCSI01 sp013813075	76.99	0.161	d__Bacteria;p__Acidobacteriota;c__Vicinamibacteria;o__Vicinamibacterales;f__UBA2999;g__JACCSI01;s__	taxonomic classification defined by topology and ANI	classification based on placement in class-level tree	N/A	71.2	11	0.89114	N/A
SM1030_bin.54	d__Bacteria;p__Fibrobacterota;c__Fibrobacteria;o__UBA11236;f__UBA11236;g__UBA11236;s__	N/A	N/A	N/A	N/A	N/A	GCA_021155885.1	95	d__Bacteria;p__Fibrobacterota;c__Fibrobacteria;o__UBA11236;f__UBA11236;g__UBA11236;s__UBA11236 sp021155885	78.81	0.373	d__Bacteria;p__Fibrobacterota;c__Fibrobacteria;o__UBA11236;f__UBA11236;g__UBA11236;s__	taxonomic classification defined by topology and ANI	classification based on placement in class-level tree	GCA_900299345.1, s__UBA11236 sp003455335, 95.0, 77.42, 0.144	78.83	11	0.92676	N/A
SM1030_bin.55	d__Bacteria;p__JACPWU01;c__JACPWU01;o__JACPWU01;f__;g__;s__	N/A	N/A	N/A	N/A	N/A	N/A	N/A	N/A	N/A	N/A	d__Bacteria;p__JACPWU01;c__JACPWU01;o__JACPWU01;f__;g__;s__	taxonomic novelty determined using RED	classification based on placement in class-level tree	N/A	61.39	11	0.71046	N/A
SM1030_bin.56	d__Bacteria;p__Gemmatimonadota;c__Gemmatimonadetes;o__Longimicrobiales;f__UBA6960;g__;s__	N/A	N/A	N/A	N/A	N/A	N/A	N/A	N/A	N/A	N/A	d__Bacteria;p__Gemmatimonadota;c__Gemmatimonadetes;o__Longimicrobiales;f__UBA6960;g__;s__	taxonomic novelty determined using RED	classification based on placement in class-level tree	N/A	41.43	11	0.88592	N/A
SM1030_bin.57	d__Bacteria;p__Pseudomonadota;c__Alphaproteobacteria;o__Caulobacterales;f__TH1-2;g__;s__	N/A	N/A	N/A	N/A	N/A	N/A	N/A	N/A	N/A	N/A	d__Bacteria;p__Pseudomonadota;c__Alphaproteobacteria;o__Caulobacterales;f__TH1-2;g__;s__	taxonomic novelty determined using RED	classification based on placement in class-level tree	N/A	42.24	11	0.89962	N/A
SM1030_bin.58	d__Bacteria;p__Chloroflexota;c__Anaerolineae;o__Aggregatilineales;f__UBA2796;g__JAJPHV01;s__	N/A	N/A	N/A	N/A	N/A	GCA_021325095.1	95	d__Bacteria;p__Chloroflexota;c__Anaerolineae;o__Aggregatilineales;f__UBA2796;g__JAJPHV01;s__JAJPHV01 sp021325095	75.87	0.069	d__Bacteria;p__Chloroflexota;c__Anaerolineae;o__Aggregatilineales;f__UBA2796;g__JAJPHV01;s__	taxonomic classification defined by topology and ANI	classification based on placement in class-level tree	N/A	80	11	0.89312	N/A
SM1030_bin.60	d__Bacteria;p__Patescibacteria;c__Paceibacteria;o__UBA9983_A;f__W02-35-19;g__;s__	N/A	N/A	N/A	N/A	N/A	N/A	N/A	N/A	N/A	N/A	d__Bacteria;p__Patescibacteria;c__Paceibacteria;o__UBA9983_A;f__W02-35-19;g__;s__	taxonomic novelty determined using RED	classification based on placement in class-level tree	N/A	49.51	11	0.78849	N/A
SM1030_bin.61	d__Bacteria;p__Patescibacteria;c__Paceibacteria;o__UBA9983_A;f__UBA6899;g__JAJZQJ01;s__	N/A	N/A	N/A	N/A	N/A	GCA_021851895.1	95	d__Bacteria;p__Patescibacteria;c__Paceibacteria;o__UBA9983_A;f__UBA6899;g__JAJZQJ01;s__JAJZQJ01 sp021851895	77.16	0.061	d__Bacteria;p__Patescibacteria;c__Paceibacteria;o__UBA9983_A;f__UBA6899;g__JAJZQJ01;s__	taxonomic classification defined by topology and ANI	classification based on placement in class-level tree	N/A	69.69	11	0.91017	N/A
SM1030_bin.62	d__Bacteria;p__Acidobacteriota;c__Vicinamibacteria;o__Vicinamibacterales;f__2-12-FULL-66-21;g__2-12-FULL-66-21;s__	N/A	N/A	N/A	N/A	N/A	GCA_001767455.1	95	d__Bacteria;p__Acidobacteriota;c__Vicinamibacteria;o__Vicinamibacterales;f__2-12-FULL-66-21;g__2-12-FULL-66-21;s__2-12-FULL-66-21 sp001767455	78.05	0.303	d__Bacteria;p__Acidobacteriota;c__Vicinamibacteria;o__Vicinamibacterales;f__2-12-FULL-66-21;g__2-12-FULL-66-21;s__	taxonomic classification defined by topology and ANI	classification based on placement in class-level tree	N/A	51.38	11	0.88554	N/A
SM1030_bin.64	d__Bacteria;p__Pseudomonadota;c__Gammaproteobacteria;o__DSM-16500;f__DSM-16500;g__;s__	N/A	N/A	N/A	N/A	N/A	N/A	N/A	N/A	N/A	N/A	d__Bacteria;p__Pseudomonadota;c__Gammaproteobacteria;o__DSM-16500;f__DSM-16500;g__;s__	taxonomic classification fully defined by topology	classification based on placement in class-level tree	N/A	53.07	11	0.85037	N/A
SM1030_bin.65	d__Bacteria;p__Pseudomonadota;c__Gammaproteobacteria;o__Burkholderiales;f__Burkholderiaceae_B;g__Polaromonas;s__	N/A	N/A	N/A	N/A	N/A	N/A	N/A	N/A	N/A	N/A	d__Bacteria;p__Pseudomonadota;c__Gammaproteobacteria;o__Burkholderiales;f__Burkholderiaceae_B;g__Polaromonas;s__	taxonomic classification defined by topology and ANI	classification based on placement in class-level tree	GCF_003711205.1, s__Polaromonas sp003711205, 95.0, 85.95, 0.736; GCF_900116715.1, s__Polaromonas sp900116715, 95.0, 85.78, 0.714; GCF_000282655.1, s__Polaromonas sp000282655, 95.0, 85.73, 0.749; GCF_900103405.1, s__Polaromonas sp900103405, 95.0, 85.72, 0.791; GCA_021153985.1, s__Polaromonas sp021153985, 95.0, 85.4, 0.751; GCF_001598235.1, s__Polaromonas jejuensis, 95.0, 82.27, 0.56; GCF_000013865…	90.51	11	0.98973	Genome not assigned to closest species as it falls outside its pre-defined ANI radius
SM1030_bin.66	d__Bacteria;p__Pseudomonadota;c__Gammaproteobacteria;o__UBA6186;f__UBA6186;g__;s__	N/A	N/A	N/A	N/A	N/A	N/A	N/A	N/A	N/A	N/A	d__Bacteria;p__Pseudomonadota;c__Gammaproteobacteria;o__UBA6186;f__UBA6186;g__;s__	taxonomic classification fully defined by topology	classification based on placement in class-level tree	N/A	34.62	11	0.77778	N/A
SM1030_bin.67	d__Bacteria;p__Acidobacteriota;c__Vicinamibacteria;o__Vicinamibacterales;f__UBA2999;g__JACCSI01;s__	N/A	N/A	N/A	N/A	N/A	GCA_013813075.1	95	d__Bacteria;p__Acidobacteriota;c__Vicinamibacteria;o__Vicinamibacterales;f__UBA2999;g__JACCSI01;s__JACCSI01 sp013813075	77.2	0.294	d__Bacteria;p__Acidobacteriota;c__Vicinamibacteria;o__Vicinamibacterales;f__UBA2999;g__JACCSI01;s__	taxonomic classification defined by topology and ANI	classification based on placement in class-level tree	N/A	81.01	11	0.88957	N/A
SM1030_bin.68	d__Bacteria;p__Gemmatimonadota;c__Gemmatimonadetes;o__Gemmatimonadales;f__Gemmatimonadaceae;g__Fen-1231;s__	N/A	N/A	N/A	N/A	N/A	GCA_014192065.1	95	d__Bacteria;p__Gemmatimonadota;c__Gemmatimonadetes;o__Gemmatimonadales;f__Gemmatimonadaceae;g__Fen-1231;s__Fen-1231 sp014192065	77.75	0.405	d__Bacteria;p__Gemmatimonadota;c__Gemmatimonadetes;o__Gemmatimonadales;f__Gemmatimonadaceae;g__Fen-1231;s__	taxonomic classification defined by topology and ANI	classification based on placement in class-level tree	GCA_016874035.1, s__Fen-1231 sp016874035, 95.0, 78.3, 0.393; GCA_016194585.1, s__Fen-1231 sp016194585, 95.0, 78.0, 0.297; GCA_017881585.1, s__Fen-1231 sp017881585, 95.0, 77.84, 0.271; GCA_003171215.1, s__Fen-1231 sp003171215, 95.0, 77.58, 0.214; GCA_020851455.1, s__Fen-1231 sp020851455, 95.0, 77.37, 0.315; GCA_903876745.1, s__Fen-1231 sp903876745, 95.0, 77.13, 0.223; GCA_903882745.1, s__Fen-1231 …	81.25	11	0.92598	N/A
SM1030_bin.69	d__Bacteria;p__Chlamydiota;c__Chlamydiia;o__Chlamydiales;f__SM23-39;g__2-02-FULL-45-22_A;s__	N/A	N/A	N/A	N/A	N/A	GCA_002773795.1	95	d__Bacteria;p__Chlamydiota;c__Chlamydiia;o__Chlamydiales;f__SM23-39;g__2-02-FULL-45-22_A;s__2-02-FULL-45-22_A sp002773795	76.4	0.125	d__Bacteria;p__Chlamydiota;c__Chlamydiia;o__Chlamydiales;f__SM23-39;g__2-02-FULL-45-22_A;s__	taxonomic classification defined by topology and ANI	classification based on placement in class-level tree	N/A	71.28	11	0.92325	N/A
SM1030_bin.7	d__Bacteria;p__Patescibacteria;c__ABY1;o__SG8-24;f__UBA9934;g__JAGORL01;s__	N/A	N/A	N/A	N/A	N/A	GCA_023246145.1	95	d__Bacteria;p__Patescibacteria;c__ABY1;o__SG8-24;f__UBA9934;g__JAGORL01;s__JAGORL01 sp023246145	77.41	0.128	d__Bacteria;p__Patescibacteria;c__ABY1;o__SG8-24;f__UBA9934;g__JAGORL01;s__	taxonomic classification defined by topology and ANI	classification based on placement in class-level tree	GCA_943357745.1, s__JAGORL01 sp943357745, 95.0, 78.07, 0.026; GCA_018062825.1, s__JAGORL01 sp018062825, 95.0, 77.31, 0.06; GCA_943359345.1, s__JAGORL01 sp943359345, 95.0, 76.48, 0.055	66.49	11	0.93235	N/A
SM1030_bin.72	d__Bacteria;p__Bacteroidota;c__Bacteroidia;o__Sphingobacteriales;f__Sphingobacteriaceae;g__Mucilaginibacter;s__	N/A	N/A	N/A	N/A	N/A	GCF_002797815.1	95	d__Bacteria;p__Bacteroidota;c__Bacteroidia;o__Sphingobacteriales;f__Sphingobacteriaceae;g__Mucilaginibacter;s__Mucilaginibacter auburnensis	79.43	0.473	d__Bacteria;p__Bacteroidota;c__Bacteroidia;o__Sphingobacteriales;f__Sphingobacteriaceae;g__Mucilaginibacter;s__	taxonomic classification defined by topology and ANI	classification based on placement in class-level tree	GCA_014376655.1, s__Mucilaginibacter sp014376655, 95.0, 78.22, 0.262; GCF_020880695.1, s__Mucilaginibacter sp020880695, 95.0, 78.08, 0.243; GCF_007558865.1, s__Mucilaginibacter corticis, 95.0, 78.01, 0.254; GCF_018449775.1, s__Mucilaginibacter sp018449775, 95.0, 77.94, 0.225; GCA_013288485.1, s__Mucilaginibacter sp013288485, 95.0, 77.86, 0.253; GCA_013288465.1, s__Mucilaginibacter sp013288465, 95…	98.25	11	0.97183	N/A
SM1030_bin.73	d__Bacteria;p__Gemmatimonadota;c__Gemmatimonadetes;o__Longimicrobiales;f__RSA9;g__;s__	N/A	N/A	N/A	N/A	N/A	N/A	N/A	N/A	N/A	N/A	d__Bacteria;p__Gemmatimonadota;c__Gemmatimonadetes;o__Longimicrobiales;f__RSA9;g__;s__	taxonomic classification fully defined by topology	classification based on placement in class-level tree	N/A	49.71	11	0.78861	N/A
SM1030_bin.74	d__Bacteria;p__Patescibacteria;c__ABY1;o__Magasanikbacterales;f__GWA2-37-8;g__XYD2-FULL-39-9;s__	N/A	N/A	N/A	N/A	N/A	GCA_007376295.1	95	d__Bacteria;p__Patescibacteria;c__ABY1;o__Magasanikbacterales;f__GWA2-37-8;g__XYD2-FULL-39-9;s__XYD2-FULL-39-9 sp007376295	82.26	0.771	d__Bacteria;p__Patescibacteria;c__ABY1;o__Magasanikbacterales;f__GWA2-37-8;g__XYD2-FULL-39-9;s__	taxonomic classification defined by topology and ANI	classification based on placement in class-level tree	GCA_001783215.1, s__XYD2-FULL-39-9 sp001783215, 95.0, 77.58, 0.365; GCA_016182085.1, s__XYD2-FULL-39-9 sp016182085, 95.0, 77.53, 0.297; GCA_017991415.1, s__XYD2-FULL-39-9 sp017991415, 95.0, 76.72, 0.25	58.51	11	0.9731	Genome not assigned to closest species as it falls outside its pre-defined ANI radius
SM1030_bin.77	d__Bacteria;p__Methylomirabilota;c__Methylomirabilia;o__Rokubacteriales;f__CSP1-6;g__;s__	N/A	N/A	N/A	N/A	N/A	N/A	N/A	N/A	N/A	N/A	d__Bacteria;p__Methylomirabilota;c__Methylomirabilia;o__Rokubacteriales;f__CSP1-6;g__;s__	taxonomic classification fully defined by topology	classification based on placement in class-level tree	N/A	76.33	11	0.88599	N/A
SM1030_bin.78	d__Bacteria;p__Chlamydiota;c__Chlamydiia;o__Chlamydiales;f__JAAKFR01;g__JAJACO01;s__	N/A	N/A	N/A	N/A	N/A	GCA_022601475.1	95	d__Bacteria;p__Chlamydiota;c__Chlamydiia;o__Chlamydiales;f__JAAKFR01;g__JAJACO01;s__JAJACO01 sp022601475	75.55	0.04	d__Bacteria;p__Chlamydiota;c__Chlamydiia;o__Chlamydiales;f__JAAKFR01;g__JAJACO01;s__	taxonomic classification defined by topology and ANI	classification based on placement in class-level tree	N/A	61.39	11	0.87306	N/A
SM1030_bin.79	d__Bacteria;p__Planctomycetota;c__Planctomycetia;o__Gemmatales;f__Gemmataceae;g__;s__	N/A	N/A	N/A	N/A	N/A	N/A	N/A	N/A	N/A	N/A	d__Bacteria;p__Planctomycetota;c__Planctomycetia;o__Gemmatales;f__Gemmataceae;g__;s__	taxonomic classification fully defined by topology	classification based on placement in class-level tree	N/A	49.77	11	0.83735	N/A
SM1030_bin.80	d__Bacteria;p__UBP17;c__UBA6191;o__JACPRK01;f__JACQZM01;g__;s__	N/A	N/A	N/A	N/A	N/A	GCA_016213885.1	95	d__Bacteria;p__UBP17;c__UBA6191;o__JACPRK01;f__JACQZM01;g__JACQZM01;s__JACQZM01 sp016213885	75.79	0.056	d__Bacteria;p__UBP17;c__UBA6191;o__JACPRK01;f__JACQZM01;g__;s__	taxonomic classification defined by topology and ANI	classification based on placement in class-level tree	N/A	54.14	11	0.77891	N/A
SM1030_bin.81	d__Bacteria;p__Acidobacteriota;c__Vicinamibacteria;o__Fen-336;f__JAGNNV01;g__JAGNNV01;s__	N/A	N/A	N/A	N/A	N/A	N/A	N/A	N/A	N/A	N/A	d__Bacteria;p__Acidobacteriota;c__Vicinamibacteria;o__Fen-336;f__JAGNNV01;g__JAGNNV01;s__	ANI	classification based on placement in class-level tree	GCA_019694155.1, s__JAGNNV01 sp019694155, 95.0, 79.08, 0.372; GCA_017990495.1, s__JAGNNV01 sp017990495, 95.0, 78.59, 0.369; GCA_016650185.1, s__JAGNNV01 sp016650185, 95.0, 77.91, 0.304	91.98	11	0.94157	N/A
SM1030_bin.82	d__Bacteria;p__Verrucomicrobiota;c__Verrucomicrobiae;o__Opitutales;f__Opitutaceae;g__CAITWF01;s__	N/A	N/A	N/A	N/A	N/A	GCA_903840415.1	95	d__Bacteria;p__Verrucomicrobiota;c__Verrucomicrobiae;o__Opitutales;f__Opitutaceae;g__CAITWF01;s__CAITWF01 sp903840415	80.21	0.397	d__Bacteria;p__Verrucomicrobiota;c__Verrucomicrobiae;o__Opitutales;f__Opitutaceae;g__CAITWF01;s__	taxonomic classification defined by topology and ANI	classification based on placement in class-level tree	GCA_903896015.1, s__CAITWF01 sp903896015, 95.0, 80.29, 0.422; GCA_009695305.1, s__CAITWF01 sp009695305, 95.0, 78.66, 0.294; GCA_903948415.1, s__CAITWF01 sp903948415, 95.0, 78.41, 0.299; GCA_945871085.1, s__CAITWF01 sp945871085, 95.0, 77.78, 0.256; GCA_945861235.1, s__CAITWF01 sp945861235, 95.0, 77.75, 0.161; GCA_945874455.1, s__CAITWF01 sp945874455, 95.0, 77.38, 0.196; GCA_005799525.1, s__CAITWF0…	31.3	11	0.9654	N/A
SM1030_bin.83	d__Bacteria;p__Pseudomonadota;c__Gammaproteobacteria;o__DSM-16500;f__DSM-16500;g__2-12-FULL-42-10;s__	N/A	N/A	N/A	N/A	N/A	GCA_001801625.1	95	d__Bacteria;p__Pseudomonadota;c__Gammaproteobacteria;o__DSM-16500;f__DSM-16500;g__2-12-FULL-42-10;s__2-12-FULL-42-10 sp001801625	77.18	0.012	d__Bacteria;p__Pseudomonadota;c__Gammaproteobacteria;o__DSM-16500;f__DSM-16500;g__2-12-FULL-42-10;s__	taxonomic classification defined by topology and ANI	classification based on placement in class-level tree	N/A	40.28	11	0.88168	N/A
SM1030_bin.84	d__Bacteria;p__Actinomycetota;c__Acidimicrobiia;o__Acidimicrobiales;f__Ilumatobacteraceae;g__Desertimonas;s__	N/A	N/A	N/A	N/A	N/A	GCF_003426815.1	95	d__Bacteria;p__Actinomycetota;c__Acidimicrobiia;o__Acidimicrobiales;f__Ilumatobacteraceae;g__Desertimonas;s__Desertimonas flava	77.95	0.411	d__Bacteria;p__Actinomycetota;c__Acidimicrobiia;o__Acidimicrobiales;f__Ilumatobacteraceae;g__Desertimonas;s__	taxonomic classification defined by topology and ANI	classification based on placement in class-level tree	N/A	43.52	11	0.89527	N/A
SM1030_bin.85	d__Bacteria;p__Chloroflexota;c__UBA6077;o__UBA6077;f__JAJPHF01;g__JAJPHF01;s__	N/A	N/A	N/A	N/A	N/A	GCA_021325365.1	95	d__Bacteria;p__Chloroflexota;c__UBA6077;o__UBA6077;f__JAJPHF01;g__JAJPHF01;s__JAJPHF01 sp021325365	77.55	0.294	d__Bacteria;p__Chloroflexota;c__UBA6077;o__UBA6077;f__JAJPHF01;g__JAJPHF01;s__	taxonomic classification defined by topology and ANI	classification based on placement in class-level tree	N/A	46.47	11	0.86641	N/A
SM1030_bin.86	d__Bacteria;p__Pseudomonadota;c__Gammaproteobacteria;o__Burkholderiales;f__SG8-39;g__2-02-FULL-62-17;s__	N/A	N/A	N/A	N/A	N/A	N/A	N/A	N/A	N/A	N/A	d__Bacteria;p__Pseudomonadota;c__Gammaproteobacteria;o__Burkholderiales;f__SG8-39;g__2-02-FULL-62-17;s__	ANI	classification based on placement in class-level tree	GCA_945897475.1, s__2-02-FULL-62-17 sp945897475, 95.0, 79.02, 0.402; GCA_903899705.1, s__2-02-FULL-62-17 sp903899705, 95.0, 78.92, 0.401; GCA_001770355.1, s__2-02-FULL-62-17 sp001770355, 95.0, 78.7, 0.303; GCA_903859155.1, s__2-02-FULL-62-17 sp903859155, 95.0, 78.37, 0.325	56.43	11	0.95299	N/A
SM1030_bin.87	d__Bacteria;p__Planctomycetota;c__Planctomycetia;o__Gemmatales;f__Gemmataceae;g__;s__	N/A	N/A	N/A	N/A	N/A	N/A	N/A	N/A	N/A	N/A	d__Bacteria;p__Planctomycetota;c__Planctomycetia;o__Gemmatales;f__Gemmataceae;g__;s__	taxonomic classification fully defined by topology	classification based on placement in class-level tree	N/A	36.68	11	0.86398	N/A
SM1030_bin.9	d__Bacteria;p__Patescibacteria;c__Paceibacteria;o__2-02-FULL-40-12;f__GWA2-44-9;g__;s__	N/A	N/A	N/A	N/A	N/A	N/A	N/A	N/A	N/A	N/A	d__Bacteria;p__Patescibacteria;c__Paceibacteria;o__2-02-FULL-40-12;f__GWA2-44-9;g__;s__	taxonomic novelty determined using RED	classification based on placement in class-level tree	N/A	59.44	11	0.89985	N/A
SM1031_bin.1	d__Bacteria;p__Pseudomonadota;c__Gammaproteobacteria;o__Burkholderiales;f__SG8-41;g__UBA5216;s__	N/A	N/A	N/A	N/A	N/A	N/A	N/A	N/A	N/A	N/A	d__Bacteria;p__Pseudomonadota;c__Gammaproteobacteria;o__Burkholderiales;f__SG8-41;g__UBA5216;s__	taxonomic classification defined by topology and ANI	classification based on placement in class-level tree	GCA_021730905.1, s__UBA5216 sp021730905, 95.0, 81.45, 0.688; GCA_945893125.1, s__UBA5216 sp945893125, 95.0, 79.88, 0.523; GCA_002412495.1, s__UBA5216 sp002412495, 95.0, 79.53, 0.623; GCA_945861275.1, s__UBA5216 sp945861275, 95.0, 79.47, 0.576; GCA_945864585.1, s__UBA5216 sp945864585, 95.0, 79.24, 0.527; GCA_009885185.1, s__UBA5216 sp009885185, 95.0, 79.11, 0.422; GCA_945906815.1, s__UBA5216 sp945…	72.21	11	0.95967	Genome not assigned to closest species as it falls outside its pre-defined ANI radius
SM1031_bin.10	d__Bacteria;p__Pseudomonadota;c__Alphaproteobacteria;o__Caulobacterales;f__Caulobacteraceae;g__;s__	N/A	N/A	N/A	N/A	N/A	N/A	N/A	N/A	N/A	N/A	d__Bacteria;p__Pseudomonadota;c__Alphaproteobacteria;o__Caulobacterales;f__Caulobacteraceae;g__;s__	taxonomic novelty determined using RED	classification based on placement in class-level tree	N/A	65.32	11	0.90185	N/A
SM1031_bin.11	d__Bacteria;p__Patescibacteria;c__ABY1;o__SG8-24;f__2-12-FULL-60-25;g__JAHJRN01;s__	N/A	N/A	N/A	N/A	N/A	GCA_018830865.1	95	d__Bacteria;p__Patescibacteria;c__ABY1;o__SG8-24;f__2-12-FULL-60-25;g__JAHJRN01;s__JAHJRN01 sp018830865	76.54	0.078	d__Bacteria;p__Patescibacteria;c__ABY1;o__SG8-24;f__2-12-FULL-60-25;g__JAHJRN01;s__	taxonomic classification defined by topology and ANI	classification based on placement in class-level tree	N/A	51.68	11	0.89105	N/A
SM1031_bin.12	d__Bacteria;p__Acidobacteriota;c__Vicinamibacteria;o__Vicinamibacterales;f__SCN-69-37;g__SYFT01;s__	N/A	N/A	N/A	N/A	N/A	GCA_016871335.1	95	d__Bacteria;p__Acidobacteriota;c__Vicinamibacteria;o__Vicinamibacterales;f__SCN-69-37;g__SYFT01;s__SYFT01 sp016871335	79.16	0.391	d__Bacteria;p__Acidobacteriota;c__Vicinamibacteria;o__Vicinamibacterales;f__SCN-69-37;g__SYFT01;s__	taxonomic classification defined by topology and ANI	classification based on placement in class-level tree	GCA_024653875.1, s__SYFT01 sp024653875, 95.0, 77.89, 0.198; GCA_009694745.1, s__SYFT01 sp009694745, 95.0, 77.52, 0.186; GCA_016716905.1, s__SYFT01 sp016716905, 95.0, 77.5, 0.255; GCA_005799825.1, s__SYFT01 sp005799825, 95.0, 76.98, 0.166; GCA_013203475.1, s__SYFT01 sp013203475, 95.0, 76.8, 0.128; GCA_024640135.1, s__SYFT01 sp024640135, 95.0, 76.6, 0.15	45.8	11	0.94609	N/A
SM1031_bin.13	d__Bacteria;p__Gemmatimonadota;c__Gemmatimonadetes;o__Gemmatimonadales;f__GWC2-71-9;g__;s__	N/A	N/A	N/A	N/A	N/A	N/A	N/A	N/A	N/A	N/A	d__Bacteria;p__Gemmatimonadota;c__Gemmatimonadetes;o__Gemmatimonadales;f__GWC2-71-9;g__;s__	taxonomic novelty determined using RED	classification based on placement in class-level tree	N/A	57.22	11	0.84411	N/A
SM1031_bin.14	d__Bacteria;p__Bacteroidota;c__Bacteroidia;o__Chitinophagales;f__Chitinophagaceae;g__Flavipsychrobacter;s__	N/A	N/A	N/A	N/A	N/A	N/A	N/A	N/A	N/A	N/A	d__Bacteria;p__Bacteroidota;c__Bacteroidia;o__Chitinophagales;f__Chitinophagaceae;g__Flavipsychrobacter;s__	ANI	classification based on placement in class-level tree	GCA_903821975.1, s__Flavipsychrobacter sp903821975, 95.0, 77.13, 0.126; GCA_903881585.1, s__Flavipsychrobacter sp903881585, 95.0, 77.09, 0.157; GCA_013285595.1, s__Flavipsychrobacter sp013285595, 95.0, 77.08, 0.127; GCA_903887415.1, s__Flavipsychrobacter sp903887415, 95.0, 77.01, 0.148; GCA_016786665.1, s__Flavipsychrobacter sp016786665, 95.0, 76.97, 0.04; GCA_013288285.1, s__Flavipsychrobacter s…	55.69	11	0.97106	N/A
SM1031_bin.15	d__Bacteria;p__Bacteroidota;c__Bacteroidia;o__Sphingobacteriales;f__Sphingobacteriaceae;g__Mucilaginibacter;s__	N/A	N/A	N/A	N/A	N/A	GCF_014773275.1	95	d__Bacteria;p__Bacteroidota;c__Bacteroidia;o__Sphingobacteriales;f__Sphingobacteriaceae;g__Mucilaginibacter;s__Mucilaginibacter rigui	92.84	0.86	d__Bacteria;p__Bacteroidota;c__Bacteroidia;o__Sphingobacteriales;f__Sphingobacteriaceae;g__Mucilaginibacter;s__	taxonomic classification defined by topology and ANI	classification based on placement in class-level tree	GCF_001636615.1, s__Mucilaginibacter sp001636615, 95.0, 87.34, 0.744; GCF_004168255.1, s__Mucilaginibacter terrigena, 95.0, 82.64, 0.683; GCF_024498135.1, s__Mucilaginibacter sp024498135, 95.0, 82.39, 0.646; GCF_024055595.1, s__Mucilaginibacter sp024055595, 95.0, 81.95, 0.677; GCF_004378255.1, s__Mucilaginibacter phyllosphaerae, 95.0, 81.53, 0.596; GCF_010093045.1, s__Mucilaginibacter sp010093045…	95.41	11	0.99432	Genome not assigned to closest species as it falls outside its pre-defined ANI radius
SM1031_bin.16	d__Bacteria;p__Planctomycetota;c__MHYJ01;o__MHYJ01;f__JACPRB01;g__JACQVR01;s__	N/A	N/A	N/A	N/A	N/A	GCA_016209705.1	95	d__Bacteria;p__Planctomycetota;c__MHYJ01;o__MHYJ01;f__JACPRB01;g__JACQVR01;s__JACQVR01 sp016209705	76.85	0.242	d__Bacteria;p__Planctomycetota;c__MHYJ01;o__MHYJ01;f__JACPRB01;g__JACQVR01;s__	taxonomic classification defined by topology and ANI	classification based on placement in class-level tree	N/A	44.45	11	0.86318	N/A
SM1031_bin.17	d__Bacteria;p__Pseudomonadota;c__Gammaproteobacteria;o__Burkholderiales;f__SG8-39;g__SCGC-AG-212-J23;s__	N/A	N/A	N/A	N/A	N/A	GCA_001644455.1	95	d__Bacteria;p__Pseudomonadota;c__Gammaproteobacteria;o__Burkholderiales;f__SG8-39;g__SCGC-AG-212-J23;s__SCGC-AG-212-J23 sp001644455	84.91	0.505	d__Bacteria;p__Pseudomonadota;c__Gammaproteobacteria;o__Burkholderiales;f__SG8-39;g__SCGC-AG-212-J23;s__	taxonomic classification defined by topology and ANI	classification based on placement in class-level tree	GCA_001772055.1, s__SCGC-AG-212-J23 sp001772055, 95.0, 81.41, 0.493; GCA_005888925.1, s__SCGC-AG-212-J23 sp005888925, 95.0, 80.31, 0.527; GCA_005881595.1, s__SCGC-AG-212-J23 sp005881595, 95.0, 80.07, 0.541; GCA_004297625.1, s__SCGC-AG-212-J23 sp004297625, 95.0, 79.86, 0.615; GCA_005883675.1, s__SCGC-AG-212-J23 sp005883675, 95.0, 79.63, 0.573; GCA_019509895.1, s__SCGC-AG-212-J23 sp019509895, 95.0,…	58.93	11	0.98395	Genome not assigned to closest species as it falls outside its pre-defined ANI radius
SM1031_bin.18	d__Bacteria;p__Pseudomonadota;c__Gammaproteobacteria;o__Burkholderiales;f__Burkholderiaceae_B;g__Rhodoferax_C;s__	N/A	N/A	N/A	N/A	N/A	GCF_001955715.1	95	d__Bacteria;p__Pseudomonadota;c__Gammaproteobacteria;o__Burkholderiales;f__Burkholderiaceae_B;g__Rhodoferax_C;s__Rhodoferax_C saidenbachensis	88.73	0.895	d__Bacteria;p__Pseudomonadota;c__Gammaproteobacteria;o__Burkholderiales;f__Burkholderiaceae_B;g__Rhodoferax_C;s__	taxonomic classification defined by topology and ANI	classification based on placement in class-level tree	GCF_002943465.1, s__Rhodoferax_C sp002943465, 95.0, 82.73, 0.713; GCA_001795455.1, s__Rhodoferax_C sp001795455, 95.0, 82.25, 0.687; GCF_002251855.1, s__Rhodoferax_C sp002251855, 95.0, 81.41, 0.637; GCF_005876985.1, s__Rhodoferax_C bucti, 95.0, 80.56, 0.566; GCA_019449595.1, s__Rhodoferax_C sp019449595, 95.0, 80.42, 0.527; GCF_017798165.1, s__Rhodoferax_C sp017798165, 95.0, 80.4, 0.567; GCA_002256…	63.22	11	0.99078	Genome not assigned to closest species as it falls outside its pre-defined ANI radius
SM1031_bin.19	d__Bacteria;p__Pseudomonadota;c__Gammaproteobacteria;o__Pseudomonadales;f__Cellvibrionaceae;g__Cellvibrio;s__	N/A	N/A	N/A	N/A	N/A	GCA_003524365.1	95	d__Bacteria;p__Pseudomonadota;c__Gammaproteobacteria;o__Pseudomonadales;f__Cellvibrionaceae;g__Cellvibrio;s__Cellvibrio sp003524365	83.8	0.631	d__Bacteria;p__Pseudomonadota;c__Gammaproteobacteria;o__Pseudomonadales;f__Cellvibrionaceae;g__Cellvibrio;s__	taxonomic classification defined by topology and ANI	classification based on placement in class-level tree	GCA_002483145.1, s__Cellvibrio sp002483145, 95.0, 85.18, 0.777; GCA_903858205.1, s__Cellvibrio sp903858205, 95.0, 82.78, 0.519; GCA_021323495.1, s__Cellvibrio sp021323495, 95.0, 82.17, 0.595; GCF_000953825.1, s__Cellvibrio sp000953825, 95.0, 81.23, 0.561; GCF_008806955.1, s__Cellvibrio sp000263355, 95.0, 80.17, 0.488; GCF_001183545.1, s__Cellvibrio sp001183545, 95.0, 79.58, 0.439; GCF_002007605.1…	46.57	11	0.99387	Genome not assigned to closest species as it falls outside its pre-defined ANI radius
SM1031_bin.2	d__Bacteria;p__Acidobacteriota;c__Terriglobia;o__20CM-2-55-15;f__20CM-2-55-15;g__20CM-2-55-15;s__	N/A	N/A	N/A	N/A	N/A	N/A	N/A	N/A	N/A	N/A	d__Bacteria;p__Acidobacteriota;c__Terriglobia;o__20CM-2-55-15;f__20CM-2-55-15;g__20CM-2-55-15;s__	ANI	classification based on placement in class-level tree	GCA_003223895.1, s__20CM-2-55-15 sp003223895, 95.0, 77.11, 0.163; GCA_003222755.1, s__20CM-2-55-15 sp003222755, 95.0, 76.69, 0.145; GCA_003223875.1, s__20CM-2-55-15 sp003223875, 95.0, 76.55, 0.108; GCA_003222815.1, s__20CM-2-55-15 sp003222815, 95.0, 76.51, 0.123; GCA_001920875.1, s__20CM-2-55-15 sp001920875, 95.0, 76.45, 0.114	83.56	11	0.88257	N/A
SM1031_bin.20	d__Bacteria;p__Pseudomonadota;c__Alphaproteobacteria;o__Micropepsales;f__Micropepsaceae;g__Rhizomicrobium;s__	N/A	N/A	N/A	N/A	N/A	GCA_018449595.1	95	d__Bacteria;p__Pseudomonadota;c__Alphaproteobacteria;o__Micropepsales;f__Micropepsaceae;g__Rhizomicrobium;s__Rhizomicrobium sp018449595	83.67	0.744	d__Bacteria;p__Pseudomonadota;c__Alphaproteobacteria;o__Micropepsales;f__Micropepsaceae;g__Rhizomicrobium;s__	taxonomic classification defined by topology and ANI	classification based on placement in class-level tree	GCA_903902075.1, s__Rhizomicrobium sp903902075, 95.0, 83.03, 0.665; GCA_013697055.1, s__Rhizomicrobium sp013697055, 95.0, 82.34, 0.646; GCA_945882615.1, s__Rhizomicrobium sp945882615, 95.0, 82.27, 0.612; GCA_903837555.1, s__Rhizomicrobium sp903837555, 95.0, 82.23, 0.652; GCA_019508105.1, s__Rhizomicrobium sp019508105, 95.0, 82.15, 0.629; GCA_945860165.1, s__Rhizomicrobium sp945860165, 95.0, 81.87…	82.98	11	0.97056	Genome not assigned to closest species as it falls outside its pre-defined ANI radius
SM1031_bin.21	d__Bacteria;p__Verrucomicrobiota;c__Verrucomicrobiae;o__Opitutales;f__UBA953;g__;s__	N/A	N/A	N/A	N/A	N/A	N/A	N/A	N/A	N/A	N/A	d__Bacteria;p__Verrucomicrobiota;c__Verrucomicrobiae;o__Opitutales;f__UBA953;g__;s__	taxonomic classification fully defined by topology	classification based on placement in class-level tree	N/A	69.97	11	0.80189	N/A
SM1031_bin.22	d__Bacteria;p__Pseudomonadota;c__Gammaproteobacteria;o__DSM-16500;f__DSM-16500;g__2-12-FULL-42-10;s__	N/A	N/A	N/A	N/A	N/A	GCA_001801625.1	95	d__Bacteria;p__Pseudomonadota;c__Gammaproteobacteria;o__DSM-16500;f__DSM-16500;g__2-12-FULL-42-10;s__2-12-FULL-42-10 sp001801625	77.33	0.046	d__Bacteria;p__Pseudomonadota;c__Gammaproteobacteria;o__DSM-16500;f__DSM-16500;g__2-12-FULL-42-10;s__	taxonomic classification defined by topology and ANI	classification based on placement in class-level tree	N/A	92.71	11	0.88342	N/A
SM1031_bin.23	d__Bacteria;p__Pseudomonadota;c__Gammaproteobacteria;o__Burkholderiales;f__JACQAP01;g__JACQAP01;s__	N/A	N/A	N/A	N/A	N/A	GCA_016194905.1	95	d__Bacteria;p__Pseudomonadota;c__Gammaproteobacteria;o__Burkholderiales;f__JACQAP01;g__JACQAP01;s__JACQAP01 sp016194905	78.82	0.447	d__Bacteria;p__Pseudomonadota;c__Gammaproteobacteria;o__Burkholderiales;f__JACQAP01;g__JACQAP01;s__	taxonomic classification defined by topology and ANI	classification based on placement in class-level tree	GCA_945900965.1, s__JACQAP01 sp945900965, 95.0, 77.11, 0.214	85.98	11	0.93672	N/A
SM1031_bin.24	d__Bacteria;p__Pseudomonadota;c__Gammaproteobacteria;o__Burkholderiales;f__Burkholderiaceae_B;g__Polaromonas;s__	N/A	N/A	N/A	N/A	N/A	GCA_016185115.1	95	d__Bacteria;p__Pseudomonadota;c__Gammaproteobacteria;o__Burkholderiales;f__Burkholderiaceae_B;g__Polaromonas;s__Polaromonas sp016185115	84.2	0.82	d__Bacteria;p__Pseudomonadota;c__Gammaproteobacteria;o__Burkholderiales;f__Burkholderiaceae_B;g__Polaromonas;s__	taxonomic classification defined by topology and ANI	classification based on placement in class-level tree	GCF_003711205.1, s__Polaromonas sp003711205, 95.0, 80.78, 0.554; GCF_900103405.1, s__Polaromonas sp900103405, 95.0, 80.48, 0.559; GCF_900116715.1, s__Polaromonas sp900116715, 95.0, 80.4, 0.547; GCF_000282655.1, s__Polaromonas sp000282655, 95.0, 80.32, 0.534; GCF_001598235.1, s__Polaromonas jejuensis, 95.0, 80.0, 0.463; GCA_021153985.1, s__Polaromonas sp021153985, 95.0, 79.86, 0.502; GCF_000015505…	30.53	11	0.98932	Genome not assigned to closest species as it falls outside its pre-defined ANI radius
SM1031_bin.25	d__Bacteria;p__Pseudomonadota;c__Gammaproteobacteria;o__Burkholderiales;f__Burkholderiaceae_B;g__Variovorax;s__	N/A	N/A	N/A	N/A	N/A	GCF_900112425.1	95	d__Bacteria;p__Pseudomonadota;c__Gammaproteobacteria;o__Burkholderiales;f__Burkholderiaceae_B;g__Variovorax;s__Variovorax sp900112425	90.83	0.857	d__Bacteria;p__Pseudomonadota;c__Gammaproteobacteria;o__Burkholderiales;f__Burkholderiaceae_B;g__Variovorax;s__	taxonomic classification defined by topology and ANI	classification based on placement in class-level tree	GCA_016082275.1, s__Variovorax sp016082275, 95.0, 89.8, 0.777; GCF_003019815.1, s__Variovorax sp003019815, 95.0, 89.59, 0.835; GCF_024734665.1, s__Variovorax sp900106655, 95.0, 89.44, 0.803; GCF_022009635.1, s__Variovorax sp001899795, 95.0, 89.34, 0.815; GCF_001425205.1, s__Variovorax sp001425205, 95.0, 89.06, 0.702; GCF_000282635.1, s__Variovorax sp000282635, 95.0, 89.05, 0.697; GCF_003952185.1,…	44.53	11	0.99421	Genome not assigned to closest species as it falls outside its pre-defined ANI radius
SM1031_bin.26	d__Bacteria;p__Pseudomonadota;c__Gammaproteobacteria;o__Xanthomonadales;f__Xanthomonadaceae;g__Thermomonas;s__	N/A	N/A	N/A	N/A	N/A	GCF_014396975.1	95	d__Bacteria;p__Pseudomonadota;c__Gammaproteobacteria;o__Xanthomonadales;f__Xanthomonadaceae;g__Thermomonas;s__Thermomonas carbonis	87.75	0.791	d__Bacteria;p__Pseudomonadota;c__Gammaproteobacteria;o__Xanthomonadales;f__Xanthomonadaceae;g__Thermomonas;s__	taxonomic classification defined by topology and ANI	classification based on placement in class-level tree	GCF_006337105.1, s__Thermomonas aquatica, 95.0, 85.12, 0.727; GCA_016720345.1, s__Thermomonas sp016720345, 95.0, 84.68, 0.732; GCA_017302075.1, s__Thermomonas sp017302075, 95.0, 83.74, 0.69; GCF_011302915.1, s__Thermomonas sp011302915, 95.0, 83.64, 0.708; GCA_017302095.1, s__Thermomonas sp017302095, 95.0, 83.56, 0.705; GCF_014395425.1, s__Thermomonas brevis, 95.0, 83.32, 0.664; GCA_021821195.1, s…	75.17	11	0.98769	Genome not assigned to closest species as it falls outside its pre-defined ANI radius
SM1031_bin.27	d__Bacteria;p__Pseudomonadota;c__Gammaproteobacteria;o__Burkholderiales;f__Burkholderiaceae;g__Telluria;s__	N/A	N/A	N/A	N/A	N/A	N/A	N/A	N/A	N/A	N/A	d__Bacteria;p__Pseudomonadota;c__Gammaproteobacteria;o__Burkholderiales;f__Burkholderiaceae;g__Telluria;s__	taxonomic classification defined by topology and ANI	classification based on placement in class-level tree	GCF_012927275.1, s__Telluria polaris, 95.0, 81.15, 0.45; GCF_020831365.1, s__Telluria sp020831365, 95.0, 81.14, 0.462; GCF_016809835.1, s__Telluria soli, 95.0, 81.07, 0.461; GCF_002760655.1, s__Telluria eurypsychrophila, 95.0, 80.98, 0.497; GCF_003590855.1, s__Telluria cavernae, 95.0, 80.9, 0.455; GCA_024703915.1, s__Telluria sp024703915, 95.0, 80.89, 0.54; GCF_003953935.1, s__Telluria atriviolac…	52.87	11	0.97173	Genome not assigned to closest species as it falls outside its pre-defined ANI radius
SM1031_bin.29	d__Bacteria;p__Fibrobacterota;c__Fibrobacteria;o__UBA11236;f__UBA11236;g__Chersky-265;s__	N/A	N/A	N/A	N/A	N/A	N/A	N/A	N/A	N/A	N/A	d__Bacteria;p__Fibrobacterota;c__Fibrobacteria;o__UBA11236;f__UBA11236;g__Chersky-265;s__	ANI	classification based on placement in class-level tree	GCA_023249635.1, s__Chersky-265 sp023249635, 95.0, 79.41, 0.391; GCA_019509785.1, s__Chersky-265 sp019509785, 95.0, 78.86, 0.363; GCA_017881725.1, s__Chersky-265 sp017881725, 95.0, 77.55, 0.214	68.26	11	0.90833	N/A
SM1031_bin.3	d__Bacteria;p__Pseudomonadota;c__Gammaproteobacteria;o__Burkholderiales;f__Usitatibacteraceae;g__Usitatibacter;s__	N/A	N/A	N/A	N/A	N/A	GCF_013003965.1	95	d__Bacteria;p__Pseudomonadota;c__Gammaproteobacteria;o__Burkholderiales;f__Usitatibacteraceae;g__Usitatibacter;s__Usitatibacter rugosus	89.39	0.901	d__Bacteria;p__Pseudomonadota;c__Gammaproteobacteria;o__Burkholderiales;f__Usitatibacteraceae;g__Usitatibacter;s__	taxonomic classification defined by topology and ANI	classification based on placement in class-level tree	GCA_001953215.1, s__Usitatibacter sp001953215, 95.0, 84.15, 0.841; GCF_013003985.1, s__Usitatibacter palustris, 95.0, 81.32, 0.627; GCA_012274175.1, s__Usitatibacter sp012274175, 95.0, 79.7, 0.371; GCA_017880705.1, s__Usitatibacter sp017880705, 95.0, 79.54, 0.42	58.17	11	0.98785	Genome not assigned to closest species as it falls outside its pre-defined ANI radius
SM1031_bin.30	d__Bacteria;p__Verrucomicrobiota;c__Verrucomicrobiae;o__Pedosphaerales;f__F1-12-MAGs170;g__;s__	N/A	N/A	N/A	N/A	N/A	N/A	N/A	N/A	N/A	N/A	d__Bacteria;p__Verrucomicrobiota;c__Verrucomicrobiae;o__Pedosphaerales;f__F1-12-MAGs170;g__;s__	taxonomic novelty determined using RED	classification based on placement in class-level tree	N/A	67.77	11	0.83639	N/A
SM1031_bin.31	d__Bacteria;p__Gemmatimonadota;c__Gemmatimonadetes;o__Gemmatimonadales;f__Gemmatimonadaceae;g__Fen-1231;s__	N/A	N/A	N/A	N/A	N/A	GCA_014192065.1	95	d__Bacteria;p__Gemmatimonadota;c__Gemmatimonadetes;o__Gemmatimonadales;f__Gemmatimonadaceae;g__Fen-1231;s__Fen-1231 sp014192065	78.18	0.403	d__Bacteria;p__Gemmatimonadota;c__Gemmatimonadetes;o__Gemmatimonadales;f__Gemmatimonadaceae;g__Fen-1231;s__	taxonomic classification defined by topology and ANI	classification based on placement in class-level tree	GCA_016874035.1, s__Fen-1231 sp016874035, 95.0, 78.37, 0.379; GCA_016194585.1, s__Fen-1231 sp016194585, 95.0, 78.11, 0.304; GCA_017881585.1, s__Fen-1231 sp017881585, 95.0, 78.05, 0.296; GCA_020851455.1, s__Fen-1231 sp020851455, 95.0, 77.83, 0.32; GCA_003171215.1, s__Fen-1231 sp003171215, 95.0, 77.78, 0.25; GCA_903882745.1, s__Fen-1231 sp903882745, 95.0, 77.45, 0.195; GCA_903876745.1, s__Fen-1231 …	78.67	11	0.92493	N/A
SM1031_bin.32	d__Bacteria;p__Verrucomicrobiota;c__Verrucomicrobiae;o__Pedosphaerales;f__JACPZS01;g__;s__	N/A	N/A	N/A	N/A	N/A	GCA_016195385.1	95	d__Bacteria;p__Verrucomicrobiota;c__Verrucomicrobiae;o__Pedosphaerales;f__JACPZS01;g__JACPZS01;s__JACPZS01 sp016195385	76.07	0.102	d__Bacteria;p__Verrucomicrobiota;c__Verrucomicrobiae;o__Pedosphaerales;f__JACPZS01;g__;s__	taxonomic classification defined by topology and ANI	classification based on placement in class-level tree	N/A	44.49	11	0.79529	N/A
SM1031_bin.35	d__Bacteria;p__Pseudomonadota;c__Gammaproteobacteria;o__Steroidobacterales;f__Steroidobacteraceae;g__ZC4RG30;s__	N/A	N/A	N/A	N/A	N/A	GCA_015655465.1	95	d__Bacteria;p__Pseudomonadota;c__Gammaproteobacteria;o__Steroidobacterales;f__Steroidobacteraceae;g__ZC4RG30;s__ZC4RG30 sp015655465	80.23	0.497	d__Bacteria;p__Pseudomonadota;c__Gammaproteobacteria;o__Steroidobacterales;f__Steroidobacteraceae;g__ZC4RG30;s__	taxonomic classification defined by topology and ANI	classification based on placement in class-level tree	GCA_016720075.1, s__ZC4RG30 sp016720075, 95.0, 80.08, 0.517; GCA_003242275.1, s__ZC4RG30 sp003242275, 95.0, 79.12, 0.421; GCA_903868595.1, s__ZC4RG30 sp903868595, 95.0, 77.94, 0.292; GCA_903908825.1, s__ZC4RG30 sp903908825, 95.0, 76.98, 0.158	40.68	11	0.96965	Genome not assigned to closest species as it falls outside its pre-defined ANI radius
SM1031_bin.36	d__Bacteria;p__Nitrospirota;c__Nitrospiria;o__Nitrospirales;f__Nitrospiraceae;g__Palsa-1315;s__	N/A	N/A	N/A	N/A	N/A	N/A	N/A	N/A	N/A	N/A	d__Bacteria;p__Nitrospirota;c__Nitrospiria;o__Nitrospirales;f__Nitrospiraceae;g__Palsa-1315;s__	taxonomic classification defined by topology and ANI	classification based on placement in class-level tree	GCA_005887945.1, s__Palsa-1315 sp005887945, 95.0, 85.76, 0.658; GCA_016200355.1, s__Palsa-1315 sp016200355, 95.0, 85.24, 0.698; GCA_005239475.1, s__Palsa-1315 sp005239475, 95.0, 85.11, 0.683; GCA_003135435.1, s__Palsa-1315 sp003135435, 95.0, 85.1, 0.718; GCA_005877535.1, s__Palsa-1315 sp005877535, 95.0, 85.01, 0.809; GCA_018971525.1, s__Palsa-1315 sp018971525, 95.0, 84.07, 0.67; GCA_011391455.1, …	93.8	11	0.96476	Genome not assigned to closest species as it falls outside its pre-defined ANI radius
SM1031_bin.37	d__Bacteria;p__Bacteroidota;c__Bacteroidia;o__Flavobacteriales;f__Flavobacteriaceae;g__Flavobacterium;s__	N/A	N/A	N/A	N/A	N/A	GCF_022802975.1	95	d__Bacteria;p__Bacteroidota;c__Bacteroidia;o__Flavobacteriales;f__Flavobacteriaceae;g__Flavobacterium;s__Flavobacterium pectinovorum_B	86	0.704	d__Bacteria;p__Bacteroidota;c__Bacteroidia;o__Flavobacteriales;f__Flavobacteriaceae;g__Flavobacterium;s__	taxonomic classification defined by topology and ANI	classification based on placement in class-level tree	GCF_003202405.1, s__Flavobacterium hydrophilum, 95.0, 87.76, 0.874; GCF_020026925.1, s__Flavobacterium hibisci, 95.0, 87.51, 0.8; GCF_010645075.1, s__Flavobacterium limi, 95.0, 86.71, 0.824; GCF_010645065.1, s__Flavobacterium fluviatile, 95.0, 86.58, 0.703; GCF_903819435.1, s__Flavobacterium salmonis, 95.0, 86.05, 0.776; GCF_010614725.1, s__Flavobacterium ajazii, 95.0, 85.24, 0.741; GCF_003202435…	46.87	11	0.99483	Genome not assigned to closest species as it falls outside its pre-defined ANI radius
SM1031_bin.38	d__Bacteria;p__Pseudomonadota;c__Gammaproteobacteria;o__Burkholderiales;f__SG8-41;g__Ga0077527;s__	N/A	N/A	N/A	N/A	N/A	GCA_945885345.1	95	d__Bacteria;p__Pseudomonadota;c__Gammaproteobacteria;o__Burkholderiales;f__SG8-41;g__Ga0077527;s__Ga0077527 sp945885345	85.94	0.819	d__Bacteria;p__Pseudomonadota;c__Gammaproteobacteria;o__Burkholderiales;f__SG8-41;g__Ga0077527;s__	taxonomic classification defined by topology and ANI	classification based on placement in class-level tree	GCA_019749945.1, s__Ga0077527 sp019749945, 95.0, 85.92, 0.827; GCA_019744975.1, s__Ga0077527 sp019744975, 95.0, 85.77, 0.794; GCA_021732605.1, s__Ga0077527 sp021732605, 95.0, 85.6, 0.776; GCA_021732805.1, s__Ga0077527 sp021732805, 95.0, 81.96, 0.58; GCA_022843705.1, s__Ga0077527 sp022843705, 95.0, 80.76, 0.65; GCA_019635015.1, s__Ga0077527 sp019635015, 95.0, 80.76, 0.582; GCA_022841375.1, s__Ga00…	49.14	11	0.99099	Genome not assigned to closest species as it falls outside its pre-defined ANI radius
SM1031_bin.4	d__Bacteria;p__Pseudomonadota;c__Gammaproteobacteria;o__Pseudomonadales;f__Cellvibrionaceae;g__UBA5868;s__	N/A	N/A	N/A	N/A	N/A	GCA_002432555.1	95	d__Bacteria;p__Pseudomonadota;c__Gammaproteobacteria;o__Pseudomonadales;f__Cellvibrionaceae;g__UBA5868;s__UBA5868 sp002432555	77.02	0.204	d__Bacteria;p__Pseudomonadota;c__Gammaproteobacteria;o__Pseudomonadales;f__Cellvibrionaceae;g__UBA5868;s__	taxonomic classification defined by topology and ANI	classification based on placement in class-level tree	GCA_024707385.1, s__UBA5868 sp024707385, 95.0, 77.64, 0.295; GCA_023416875.1, s__UBA5868 sp023416875, 95.0, 77.53, 0.315; GCA_002432095.1, s__UBA5868 sp002432095, 95.0, 77.36, 0.225; GCF_014336955.1, s__UBA5868 sp014336955, 95.0, 77.33, 0.236	98.59	11	0.95061	N/A
SM1031_bin.5	d__Bacteria;p__Bacteroidota;c__Bacteroidia;o__NS11-12g;f__UBA955;g__JABMMZ01;s__	N/A	N/A	N/A	N/A	N/A	GCA_945888525.1	95	d__Bacteria;p__Bacteroidota;c__Bacteroidia;o__NS11-12g;f__UBA955;g__JABMMZ01;s__JABMMZ01 sp945888525	77.12	0.045	d__Bacteria;p__Bacteroidota;c__Bacteroidia;o__NS11-12g;f__UBA955;g__JABMMZ01;s__	taxonomic classification defined by topology and ANI	classification based on placement in class-level tree	GCA_903953615.1, s__JABMMZ01 sp903953615, 95.0, 78.05, 0.012; GCA_020848595.1, s__JABMMZ01 sp020848595, 95.0, 78.0, 0.022; GCA_945871905.1, s__JABMMZ01 sp945871905, 95.0, 76.32, 0.028; GCA_013205405.1, s__JABMMZ01 sp013205405, 95.0, 75.84, 0.01	41.23	11	0.94389	Genome has more than 13.3% of markers with multiple hits
SM1031_bin.6	d__Bacteria;p__Pseudomonadota;c__Gammaproteobacteria;o__Burkholderiales;f__Burkholderiaceae;g__Telluria;s__	N/A	N/A	N/A	N/A	N/A	N/A	N/A	N/A	N/A	N/A	d__Bacteria;p__Pseudomonadota;c__Gammaproteobacteria;o__Burkholderiales;f__Burkholderiaceae;g__Telluria;s__	taxonomic novelty determined using RED	classification based on placement in class-level tree	N/A	39.4	11	0.95092	N/A
SM1031_bin.8	d__Bacteria;p__Planctomycetota;c__Planctomycetia;o__Gemmatales;f__Gemmataceae;g__JAIEPT01;s__	N/A	N/A	N/A	N/A	N/A	GCA_019748295.1	95	d__Bacteria;p__Planctomycetota;c__Planctomycetia;o__Gemmatales;f__Gemmataceae;g__JAIEPT01;s__JAIEPT01 sp019748295	76.63	0.163	d__Bacteria;p__Planctomycetota;c__Planctomycetia;o__Gemmatales;f__Gemmataceae;g__JAIEPT01;s__	taxonomic classification defined by topology and ANI	classification based on placement in class-level tree	N/A	77.86	11	0.86992	N/A
SM1031_bin.9	d__Bacteria;p__Planctomycetota;c__JAJSAM01;o__JAKLKS01;f__JAJVHW01;g__;s__	N/A	N/A	N/A	N/A	N/A	N/A	N/A	N/A	N/A	N/A	d__Bacteria;p__Planctomycetota;c__JAJSAM01;o__JAKLKS01;f__JAJVHW01;g__;s__	taxonomic classification fully defined by topology	classification based on placement in class-level tree	N/A	72.55	11	0.79533	N/A
SM1050_bin.1	d__Bacteria;p__Pseudomonadota;c__Alphaproteobacteria;o__Rhizobiales;f__Methyloligellaceae;g__Methyloceanibacter;s__	N/A	N/A	N/A	N/A	N/A	GCA_003135455.1	95	d__Bacteria;p__Pseudomonadota;c__Alphaproteobacteria;o__Rhizobiales;f__Methyloligellaceae;g__Methyloceanibacter;s__Methyloceanibacter sp003135455	79.23	0.536	d__Bacteria;p__Pseudomonadota;c__Alphaproteobacteria;o__Rhizobiales;f__Methyloligellaceae;g__Methyloceanibacter;s__	taxonomic classification defined by topology and ANI	classification based on placement in class-level tree	GCA_022865725.1, s__Methyloceanibacter sp022865725, 95.0, 79.8, 0.487; GCA_016649675.1, s__Methyloceanibacter sp016649675, 95.0, 79.45, 0.493; GCA_002383105.1, s__Methyloceanibacter sp002383105, 95.0, 79.22, 0.454; GCA_014380485.1, s__Methyloceanibacter sp014380485, 95.0, 79.18, 0.375; GCA_016869535.1, s__Methyloceanibacter sp016869535, 95.0, 78.94, 0.474; GCF_001723305.1, s__Methyloceanibacter s…	39.58	11	0.89437	Genome not assigned to closest species as it falls outside its pre-defined ANI radius
SM1050_bin.10	d__Bacteria;p__Actinomycetota;c__Acidimicrobiia;o__Acidimicrobiales;f__JAAYBP01;g__Iamia;s__	N/A	N/A	N/A	N/A	N/A	GCF_019443745.1	95	d__Bacteria;p__Actinomycetota;c__Acidimicrobiia;o__Acidimicrobiales;f__JAAYBP01;g__Iamia;s__Iamia sp019443745	85.83	0.754	d__Bacteria;p__Actinomycetota;c__Acidimicrobiia;o__Acidimicrobiales;f__JAAYBP01;g__Iamia;s__	taxonomic classification defined by topology and ANI	classification based on placement in class-level tree	GCA_012730075.1, s__Iamia sp012730075, 95.0, 81.01, 0.667	91.1	11	0.96339	Genome not assigned to closest species as it falls outside its pre-defined ANI radius
SM1050_bin.11	d__Bacteria;p__Gemmatimonadota;c__Gemmatimonadetes;o__Gemmatimonadales;f__GWC2-71-9;g__;s__	N/A	N/A	N/A	N/A	N/A	N/A	N/A	N/A	N/A	N/A	d__Bacteria;p__Gemmatimonadota;c__Gemmatimonadetes;o__Gemmatimonadales;f__GWC2-71-9;g__;s__	taxonomic novelty determined using RED	classification based on placement in class-level tree	N/A	41.11	11	0.84699	N/A
SM1050_bin.12	d__Bacteria;p__Pseudomonadota;c__Alphaproteobacteria;o__Rickettsiales;f__;g__;s__	N/A	N/A	N/A	N/A	N/A	N/A	N/A	N/A	N/A	N/A	d__Bacteria;p__Pseudomonadota;c__Alphaproteobacteria;o__Rickettsiales;f__;g__;s__	taxonomic novelty determined using RED	classification based on placement in class-level tree	N/A	85.3	11	0.64751	N/A
SM1050_bin.13	d__Bacteria;p__Patescibacteria;c__Andersenbacteria;o__;f__;g__;s__	N/A	N/A	N/A	N/A	N/A	N/A	N/A	N/A	N/A	N/A	d__Bacteria;p__Patescibacteria;c__Andersenbacteria;o__;f__;g__;s__	taxonomic novelty determined using RED	classification based on placement in class-level tree	N/A	77.64	11	0.46099	N/A
SM1050_bin.14	d__Bacteria;p__Gemmatimonadota;c__Gemmatimonadetes;o__Longimicrobiales;f__UBA6960;g__;s__	N/A	N/A	N/A	N/A	N/A	N/A	N/A	N/A	N/A	N/A	d__Bacteria;p__Gemmatimonadota;c__Gemmatimonadetes;o__Longimicrobiales;f__UBA6960;g__;s__	taxonomic novelty determined using RED	classification based on placement in class-level tree	N/A	80.32	11	0.8367	N/A
SM1050_bin.15	d__Bacteria;p__Patescibacteria;c__Gracilibacteria;o__UBA1369;f__UBA1369;g__UBA1369;s__	N/A	N/A	N/A	N/A	N/A	GCA_002305925.1	95	d__Bacteria;p__Patescibacteria;c__Gracilibacteria;o__UBA1369;f__UBA1369;g__UBA1369;s__UBA1369 sp002305925	76.8	0.068	d__Bacteria;p__Patescibacteria;c__Gracilibacteria;o__UBA1369;f__UBA1369;g__UBA1369;s__	taxonomic classification defined by topology and ANI	classification based on placement in class-level tree	N/A	63.87	11	0.91185	N/A
SM1050_bin.18	d__Bacteria;p__Pseudomonadota;c__Gammaproteobacteria;o__Burkholderiales;f__Burkholderiaceae_B;g__Piscinibacter;s__	N/A	N/A	N/A	N/A	N/A	N/A	N/A	N/A	N/A	N/A	d__Bacteria;p__Pseudomonadota;c__Gammaproteobacteria;o__Burkholderiales;f__Burkholderiaceae_B;g__Piscinibacter;s__	taxonomic novelty determined using RED	classification based on placement in class-level tree	N/A	45.4	11	0.94087	N/A
SM1050_bin.2	d__Bacteria;p__Planctomycetota;c__JAJSAM01;o__JAKLKS01;f__JAKLKS01;g__JAKLKS01;s__	N/A	N/A	N/A	N/A	N/A	GCA_023150535.1	95	d__Bacteria;p__Planctomycetota;c__JAJSAM01;o__JAKLKS01;f__JAKLKS01;g__JAKLKS01;s__JAKLKS01 sp023150535	80.33	0.572	d__Bacteria;p__Planctomycetota;c__JAJSAM01;o__JAKLKS01;f__JAKLKS01;g__JAKLKS01;s__	taxonomic classification defined by topology and ANI	classification based on placement in class-level tree	N/A	77.58	11	0.89267	Genome not assigned to closest species as it falls outside its pre-defined ANI radius
SM1050_bin.20	d__Bacteria;p__Chloroflexota;c__Anaerolineae;o__Aggregatilineales;f__Phototrophicaceae;g__OLB15;s__	N/A	N/A	N/A	N/A	N/A	GCA_020848855.1	95	d__Bacteria;p__Chloroflexota;c__Anaerolineae;o__Aggregatilineales;f__Phototrophicaceae;g__OLB15;s__OLB15 sp020848855	79.22	0.406	d__Bacteria;p__Chloroflexota;c__Anaerolineae;o__Aggregatilineales;f__Phototrophicaceae;g__OLB15;s__	taxonomic classification defined by topology and ANI	classification based on placement in class-level tree	GCA_023392115.1, s__OLB15 sp023392115, 95.0, 76.95, 0.257; GCA_016717205.1, s__OLB15 sp016717205, 95.0, 76.87, 0.206; GCA_014879865.1, s__OLB15 sp014879865, 95.0, 76.77, 0.18; GCA_013360465.1, s__OLB15 sp013360465, 95.0, 76.57, 0.173; GCA_016789005.1, s__OLB15 sp016789005, 95.0, 76.45, 0.168; GCA_016788435.1, s__OLB15 sp016788435, 95.0, 76.37, 0.14; GCA_016713325.1, s__OLB15 sp016713325, 95.0, 76…	49.37	11	0.94716	N/A
SM1050_bin.21	d__Bacteria;p__4484-113;c__4484-113;o__4484-113;f__JAFGCY01;g__;s__	N/A	N/A	N/A	N/A	N/A	N/A	N/A	N/A	N/A	N/A	d__Bacteria;p__4484-113;c__4484-113;o__4484-113;f__JAFGCY01;g__;s__	taxonomic classification fully defined by topology	classification based on placement in class-level tree	N/A	49.97	11	0.78767	N/A
SM1050_bin.22	d__Bacteria;p__Pseudomonadota;c__Alphaproteobacteria;o__Rhizobiales;f__Rhizobiaceae;g__RCIZ01;s__RCIZ01 sp020696915	GCA_020696915.1	95	d__Bacteria;p__Pseudomonadota;c__Alphaproteobacteria;o__Rhizobiales;f__Rhizobiaceae;g__RCIZ01;s__RCIZ01 sp020696915	98.49	0.772	N/A	N/A	N/A	N/A	N/A	N/A	ani_screen	classification based on ANI only	N/A	N/A	N/A	N/A	N/A
SM1050_bin.23	d__Bacteria;p__Planctomycetota;c__Planctomycetia;o__Pirellulales;f__Pirellulaceae;g__CAIPEB01;s__	N/A	N/A	N/A	N/A	N/A	GCA_903863885.1	95	d__Bacteria;p__Planctomycetota;c__Planctomycetia;o__Pirellulales;f__Pirellulaceae;g__CAIPEB01;s__CAIPEB01 sp903863885	75.1	0.025	d__Bacteria;p__Planctomycetota;c__Planctomycetia;o__Pirellulales;f__Pirellulaceae;g__CAIPEB01;s__	taxonomic classification defined by topology and ANI	classification based on placement in class-level tree	N/A	55.67	11	0.86203	N/A
SM1050_bin.24	d__Bacteria;p__Pseudomonadota;c__Alphaproteobacteria;o__Rhizobiales;f__Rhizobiaceae;g__Mesorhizobium_F;s__	N/A	N/A	N/A	N/A	N/A	GCF_900114255.1	95	d__Bacteria;p__Pseudomonadota;c__Alphaproteobacteria;o__Rhizobiales;f__Rhizobiaceae;g__Mesorhizobium_F;s__Mesorhizobium_F albiziae	92.76	0.783	d__Bacteria;p__Pseudomonadota;c__Alphaproteobacteria;o__Rhizobiales;f__Rhizobiaceae;g__Mesorhizobium_F;s__	taxonomic classification defined by topology and ANI	classification based on placement in class-level tree	GCF_015500055.1, s__Mesorhizobium_F sp015500055, 95.0, 78.1, 0.343	83.06	11	0.99406	Genome not assigned to closest species as it falls outside its pre-defined ANI radius
SM1050_bin.25	d__Bacteria;p__Bacteroidota;c__Ignavibacteria;o__SJA-28;f__B-1AR;g__;s__	N/A	N/A	N/A	N/A	N/A	N/A	N/A	N/A	N/A	N/A	d__Bacteria;p__Bacteroidota;c__Ignavibacteria;o__SJA-28;f__B-1AR;g__;s__	taxonomic novelty determined using RED	classification based on placement in class-level tree	N/A	72.77	11	0.85961	N/A
SM1050_bin.26	d__Bacteria;p__Pseudomonadota;c__Alphaproteobacteria;o__Caulobacterales;f__TH1-2;g__Vitreimonas;s__	N/A	N/A	N/A	N/A	N/A	GCA_023461135.1	95	d__Bacteria;p__Pseudomonadota;c__Alphaproteobacteria;o__Caulobacterales;f__TH1-2;g__Vitreimonas;s__Vitreimonas sp023461135	83.37	0.561	d__Bacteria;p__Pseudomonadota;c__Alphaproteobacteria;o__Caulobacterales;f__TH1-2;g__Vitreimonas;s__	taxonomic classification defined by topology and ANI	classification based on placement in class-level tree	GCA_023384105.1, s__Vitreimonas sp900696695, 95.0, 79.83, 0.627; GCA_023410295.1, s__Vitreimonas sp023410295, 95.0, 79.68, 0.584; GCA_002083515.1, s__Vitreimonas sp002083515, 95.0, 79.31, 0.439; GCA_016791385.1, s__Vitreimonas sp016791385, 95.0, 79.26, 0.479; GCF_009792355.1, s__Vitreimonas silvestris, 95.0, 79.16, 0.619; GCA_020848895.1, s__Vitreimonas sp020848895, 95.0, 79.11, 0.424; GCA_003242…	48.1	11	0.98594	Genome not assigned to closest species as it falls outside its pre-defined ANI radius
SM1050_bin.27	d__Bacteria;p__Pseudomonadota;c__Gammaproteobacteria;o__DSM-16500;f__DSM-16500;g__2-12-FULL-42-10;s__	N/A	N/A	N/A	N/A	N/A	GCA_001801625.1	95	d__Bacteria;p__Pseudomonadota;c__Gammaproteobacteria;o__DSM-16500;f__DSM-16500;g__2-12-FULL-42-10;s__2-12-FULL-42-10 sp001801625	76.19	0.053	d__Bacteria;p__Pseudomonadota;c__Gammaproteobacteria;o__DSM-16500;f__DSM-16500;g__2-12-FULL-42-10;s__	taxonomic classification defined by topology and ANI	classification based on placement in class-level tree	N/A	68.56	11	0.88286	N/A
SM1050_bin.28	d__Bacteria;p__Pseudomonadota;c__Gammaproteobacteria;o__DSM-16500;f__DSM-16500;g__JABDBV01;s__	N/A	N/A	N/A	N/A	N/A	GCA_013288395.1	95	d__Bacteria;p__Pseudomonadota;c__Gammaproteobacteria;o__DSM-16500;f__DSM-16500;g__JABDBV01;s__JABDBV01 sp013288395	77.9	0.216	d__Bacteria;p__Pseudomonadota;c__Gammaproteobacteria;o__DSM-16500;f__DSM-16500;g__JABDBV01;s__	taxonomic classification defined by topology and ANI	classification based on placement in class-level tree	N/A	95.35	11	0.94914	N/A
SM1050_bin.29	d__Bacteria;p__Gemmatimonadota;c__Gemmatimonadetes;o__Gemmatimonadales;f__Gemmatimonadaceae;g__;s__	N/A	N/A	N/A	N/A	N/A	N/A	N/A	N/A	N/A	N/A	d__Bacteria;p__Gemmatimonadota;c__Gemmatimonadetes;o__Gemmatimonadales;f__Gemmatimonadaceae;g__;s__	taxonomic novelty determined using RED	classification based on placement in class-level tree	N/A	77.04	11	0.88593	N/A
SM1050_bin.3	d__Bacteria;p__Actinomycetota;c__Thermoleophilia;o__Solirubrobacterales;f__70-9;g__VAYN01;s__	N/A	N/A	N/A	N/A	N/A	N/A	N/A	N/A	N/A	N/A	d__Bacteria;p__Actinomycetota;c__Thermoleophilia;o__Solirubrobacterales;f__70-9;g__VAYN01;s__	taxonomic classification defined by topology and ANI	classification based on placement in class-level tree	GCA_017882505.1, s__VAYN01 sp017882505, 95.0, 86.05, 0.674; GCA_016649905.1, s__VAYN01 sp016649905, 95.0, 85.65, 0.668; GCA_013821475.1, s__VAYN01 sp013821475, 95.0, 85.55, 0.611; GCA_005885405.1, s__VAYN01 sp005885405, 95.0, 84.31, 0.669; GCA_018268655.1, s__VAYN01 sp018268655, 95.0, 82.86, 0.576; GCA_018268575.1, s__VAYN01 sp018268575, 95.0, 82.82, 0.611; GCA_018268675.1, s__VAYN01 sp018268675,…	58.61	11	0.92328	Genome not assigned to closest species as it falls outside its pre-defined ANI radius
SM1050_bin.31	d__Bacteria;p__Actinomycetota;c__Acidimicrobiia;o__IMCC26256;f__PALSA-555;g__;s__	N/A	N/A	N/A	N/A	N/A	N/A	N/A	N/A	N/A	N/A	d__Bacteria;p__Actinomycetota;c__Acidimicrobiia;o__IMCC26256;f__PALSA-555;g__;s__	taxonomic classification fully defined by topology	classification based on placement in class-level tree	N/A	47.19	11	0.84946	N/A
SM1050_bin.32	d__Bacteria;p__Verrucomicrobiota;c__Verrucomicrobiae;o__Pedosphaerales;f__JACRJY01;g__JACRJY01;s__	N/A	N/A	N/A	N/A	N/A	GCA_016235585.1	95	d__Bacteria;p__Verrucomicrobiota;c__Verrucomicrobiae;o__Pedosphaerales;f__JACRJY01;g__JACRJY01;s__JACRJY01 sp016235585	78.41	0.304	d__Bacteria;p__Verrucomicrobiota;c__Verrucomicrobiae;o__Pedosphaerales;f__JACRJY01;g__JACRJY01;s__	taxonomic classification defined by topology and ANI	classification based on placement in class-level tree	N/A	68.16	11	0.85142	N/A
SM1050_bin.33	d__Bacteria;p__Armatimonadota;c__SYMT01;o__SYMT01;f__SYMT01;g__;s__	N/A	N/A	N/A	N/A	N/A	GCA_020696885.1	95	d__Bacteria;p__Armatimonadota;c__SYMT01;o__SYMT01;f__SYMT01;g__JAJFMS01;s__JAJFMS01 sp020696885	76.75	0.207	d__Bacteria;p__Armatimonadota;c__SYMT01;o__SYMT01;f__SYMT01;g__;s__	taxonomic classification defined by topology and ANI	classification based on placement in class-level tree	N/A	66.61	11	0.81405	N/A
SM1050_bin.34	d__Bacteria;p__Patescibacteria;c__Andersenbacteria;o__;f__;g__;s__	N/A	N/A	N/A	N/A	N/A	N/A	N/A	N/A	N/A	N/A	d__Bacteria;p__Patescibacteria;c__Andersenbacteria;o__;f__;g__;s__	taxonomic novelty determined using RED	classification based on placement in class-level tree	N/A	76.6	11	0.46214	N/A
SM1050_bin.36	d__Bacteria;p__Verrucomicrobiota;c__Verrucomicrobiae;o__Pedosphaerales;f__JACPZS01;g__;s__	N/A	N/A	N/A	N/A	N/A	GCA_016195385.1	95	d__Bacteria;p__Verrucomicrobiota;c__Verrucomicrobiae;o__Pedosphaerales;f__JACPZS01;g__JACPZS01;s__JACPZS01 sp016195385	75.87	0.032	d__Bacteria;p__Verrucomicrobiota;c__Verrucomicrobiae;o__Pedosphaerales;f__JACPZS01;g__;s__	taxonomic classification defined by topology and ANI	classification based on placement in class-level tree	N/A	45.86	11	0.7988	N/A
SM1050_bin.37	d__Bacteria;p__Acidobacteriota;c__Vicinamibacteria;o__Fen-336;f__JAGNNV01;g__JAGNNV01;s__	N/A	N/A	N/A	N/A	N/A	N/A	N/A	N/A	N/A	N/A	d__Bacteria;p__Acidobacteriota;c__Vicinamibacteria;o__Fen-336;f__JAGNNV01;g__JAGNNV01;s__	taxonomic classification defined by topology and ANI	classification based on placement in class-level tree	GCA_019694155.1, s__JAGNNV01 sp019694155, 95.0, 80.51, 0.589; GCA_017990495.1, s__JAGNNV01 sp017990495, 95.0, 79.67, 0.393; GCA_016650185.1, s__JAGNNV01 sp016650185, 95.0, 78.07, 0.29	67.96	11	0.94324	Genome not assigned to closest species as it falls outside its pre-defined ANI radius
SM1050_bin.38	d__Bacteria;p__Pseudomonadota;c__Alphaproteobacteria;o__Rhizobiales;f__Methylopilaceae;g__;s__	N/A	N/A	N/A	N/A	N/A	N/A	N/A	N/A	N/A	N/A	d__Bacteria;p__Pseudomonadota;c__Alphaproteobacteria;o__Rhizobiales;f__Methylopilaceae;g__;s__	taxonomic novelty determined using RED	classification based on placement in class-level tree	N/A	84.87	11	0.88776	N/A
SM1050_bin.39	d__Bacteria;p__JACPWU01;c__JACPWU01;o__JACPWU01;f__;g__;s__	N/A	N/A	N/A	N/A	N/A	N/A	N/A	N/A	N/A	N/A	d__Bacteria;p__JACPWU01;c__JACPWU01;o__JACPWU01;f__;g__;s__	taxonomic novelty determined using RED	classification based on placement in class-level tree	N/A	53.35	11	0.70866	N/A
SM1050_bin.40	d__Bacteria;p__Pseudomonadota;c__Gammaproteobacteria;o__Legionellales;f__Legionellaceae;g__Legionella;s__	N/A	N/A	N/A	N/A	N/A	GCF_000701265.1	95	d__Bacteria;p__Pseudomonadota;c__Gammaproteobacteria;o__Legionellales;f__Legionellaceae;g__Legionella;s__Legionella wadsworthii	78.29	0.238	d__Bacteria;p__Pseudomonadota;c__Gammaproteobacteria;o__Legionellales;f__Legionellaceae;g__Legionella;s__	taxonomic classification defined by topology and ANI	classification based on placement in class-level tree	GCF_003184185.1, s__Legionella qingyii, 95.0, 78.74, 0.319; GCF_900635815.1, s__Legionella cherrii, 95.0, 78.61, 0.297; GCF_900156395.1, s__Legionella gormanii, 95.0, 78.61, 0.337; GCF_001468035.1, s__Legionella tucsonensis, 95.0, 78.53, 0.344; GCF_001467945.1, s__Legionella parisiensis, 95.0, 78.47, 0.31; GCF_001468065.1, s__Legionella steigerwaltii, 95.0, 78.47, 0.356; GCF_001648595.1, s__Legio…	37.66	11	0.9797	N/A
SM1050_bin.41	d__Bacteria;p__Actinomycetota;c__Thermoleophilia;o__Solirubrobacterales;f__70-9;g__67-14;s__	N/A	N/A	N/A	N/A	N/A	N/A	N/A	N/A	N/A	N/A	d__Bacteria;p__Actinomycetota;c__Thermoleophilia;o__Solirubrobacterales;f__70-9;g__67-14;s__	taxonomic classification defined by topology and ANI	classification based on placement in class-level tree	GCA_016650125.1, s__67-14 sp016650125, 95.0, 83.61, 0.753; GCA_016712175.1, s__67-14 sp016712175, 95.0, 82.37, 0.671; GCA_017304845.1, s__67-14 sp017304845, 95.0, 80.22, 0.427; GCA_001897355.1, s__67-14 sp001897355, 95.0, 79.89, 0.575; GCA_019694145.1, s__67-14 sp019694145, 95.0, 79.64, 0.448; GCA_023436605.1, s__67-14 sp023436605, 95.0, 79.42, 0.473; GCA_020438425.1, s__67-14 sp020438425, 95.0, …	92.91	11	0.9603	Genome not assigned to closest species as it falls outside its pre-defined ANI radius
SM1050_bin.42	d__Bacteria;p__Hydrogenedentota;c__Hydrogenedentia;o__Hydrogenedentiales;f__SLHB01;g__;s__	N/A	N/A	N/A	N/A	N/A	GCA_016215105.1	95	d__Bacteria;p__Hydrogenedentota;c__Hydrogenedentia;o__Hydrogenedentiales;f__SLHB01;g__JACRLJ01;s__JACRLJ01 sp016215105	75.96	0.026	d__Bacteria;p__Hydrogenedentota;c__Hydrogenedentia;o__Hydrogenedentiales;f__SLHB01;g__;s__	taxonomic classification defined by topology and ANI	classification based on placement in class-level tree	N/A	91.96	11	0.81835	N/A
SM1050_bin.44	d__Bacteria;p__Actinomycetota;c__Acidimicrobiia;o__UBA5794;f__ZC4RG35;g__;s__	N/A	N/A	N/A	N/A	N/A	GCA_013812505.1	95	d__Bacteria;p__Actinomycetota;c__Acidimicrobiia;o__UBA5794;f__ZC4RG35;g__JACCTH01;s__JACCTH01 sp013812505	76.3	0.075	d__Bacteria;p__Actinomycetota;c__Acidimicrobiia;o__UBA5794;f__ZC4RG35;g__;s__	taxonomic classification defined by topology and ANI	classification based on placement in class-level tree	N/A	44.63	11	0.81793	N/A
SM1050_bin.45	d__Bacteria;p__Pseudomonadota;c__Gammaproteobacteria;o__Burkholderiales;f__SG8-41;g__CAMDLH01;s__	N/A	N/A	N/A	N/A	N/A	GCA_945901405.1	95	d__Bacteria;p__Pseudomonadota;c__Gammaproteobacteria;o__Burkholderiales;f__SG8-41;g__CAMDLH01;s__CAMDLH01 sp945901405	80.23	0.562	d__Bacteria;p__Pseudomonadota;c__Gammaproteobacteria;o__Burkholderiales;f__SG8-41;g__CAMDLH01;s__	taxonomic classification defined by topology and ANI	classification based on placement in class-level tree	N/A	89.43	11	0.96019	Genome not assigned to closest species as it falls outside its pre-defined ANI radius
SM1050_bin.46	d__Bacteria;p__Patescibacteria;c__Microgenomatia;o__UBA1400;f__UBA12028;g__JACRHV01;s__	N/A	N/A	N/A	N/A	N/A	GCA_016211945.1	95	d__Bacteria;p__Patescibacteria;c__Microgenomatia;o__UBA1400;f__UBA12028;g__JACRHV01;s__JACRHV01 sp016211945	78.19	0.116	d__Bacteria;p__Patescibacteria;c__Microgenomatia;o__UBA1400;f__UBA12028;g__JACRHV01;s__	taxonomic classification defined by topology and ANI	classification based on placement in class-level tree	N/A	62.52	11	0.8926	N/A
SM1050_bin.47	d__Bacteria;p__Patescibacteria;c__Kazan-3B-28;o__Kazan-3B-28;f__Kazan-3B-28;g__;s__	N/A	N/A	N/A	N/A	N/A	GCA_022703745.1	95	d__Bacteria;p__Patescibacteria;c__Kazan-3B-28;o__Kazan-3B-28;f__Kazan-3B-28;g__JAKLDB01;s__JAKLDB01 sp022703745	78.87	0.068	d__Bacteria;p__Patescibacteria;c__Kazan-3B-28;o__Kazan-3B-28;f__Kazan-3B-28;g__;s__	taxonomic classification defined by topology and ANI	classification based on placement in class-level tree	N/A	74.22	11	0.83259	N/A
SM1050_bin.48	d__Bacteria;p__Chlamydiota;c__Chlamydiia;o__Chlamydiales;f__JAAKFR01;g__;s__	N/A	N/A	N/A	N/A	N/A	GCA_011064935.1	95	d__Bacteria;p__Chlamydiota;c__Chlamydiia;o__Chlamydiales;f__JAAKFR01;g__JAAKFT01;s__JAAKFT01 sp011064935	76.61	0.027	d__Bacteria;p__Chlamydiota;c__Chlamydiia;o__Chlamydiales;f__JAAKFR01;g__;s__	taxonomic classification defined by topology and ANI	classification based on placement in class-level tree	N/A	53.8	11	0.80249	N/A
SM1050_bin.49	d__Bacteria;p__Chloroflexota;c__FW602-bin22;o__FW602-bin22;f__FW602-bin22;g__;s__	N/A	N/A	N/A	N/A	N/A	N/A	N/A	N/A	N/A	N/A	d__Bacteria;p__Chloroflexota;c__FW602-bin22;o__FW602-bin22;f__FW602-bin22;g__;s__	taxonomic novelty determined using RED	classification based on placement in class-level tree	N/A	45.54	11	0.76856	N/A
SM1050_bin.5	d__Bacteria;p__Pseudomonadota;c__Gammaproteobacteria;o__Steroidobacterales;f__Steroidobacteraceae;g__CADEED01;s__	N/A	N/A	N/A	N/A	N/A	N/A	N/A	N/A	N/A	N/A	d__Bacteria;p__Pseudomonadota;c__Gammaproteobacteria;o__Steroidobacterales;f__Steroidobacteraceae;g__CADEED01;s__	taxonomic classification defined by topology and ANI	classification based on placement in class-level tree	GCA_023457495.1, s__CADEED01 sp023457495, 95.0, 81.06, 0.552; GCA_023423065.1, s__CADEED01 sp023423065, 95.0, 81.05, 0.587; GCA_023433705.1, s__CADEED01 sp023433705, 95.0, 80.97, 0.588; GCA_902826225.1, s__CADEED01 sp902826225, 95.0, 80.91, 0.537; GCA_023433515.1, s__CADEED01 sp023433515, 95.0, 80.77, 0.538; GCA_023433465.1, s__CADEED01 sp023433465, 95.0, 80.6, 0.511; GCA_016703895.1, s__CADEED01…	46.32	11	0.95724	Genome not assigned to closest species as it falls outside its pre-defined ANI radius
SM1050_bin.50	d__Bacteria;p__Actinomycetota;c__Actinomycetia;o__Mycobacteriales;f__Mycobacteriaceae;g__Mycobacterium;s__	N/A	N/A	N/A	N/A	N/A	GCF_000243415.2	95	d__Bacteria;p__Actinomycetota;c__Actinomycetia;o__Mycobacteriales;f__Mycobacteriaceae;g__Mycobacterium;s__Mycobacterium tusciae_A	90.9	0.897	d__Bacteria;p__Actinomycetota;c__Actinomycetia;o__Mycobacteriales;f__Mycobacteriaceae;g__Mycobacterium;s__	taxonomic classification defined by topology and ANI	classification based on placement in class-level tree	GCF_002591975.1, s__Mycobacterium neglectum, 95.0, 90.05, 0.893; GCF_002086795.1, s__Mycobacterium tusciae, 95.0, 85.38, 0.853; GCA_010726765.1, s__Mycobacterium gallinarum, 95.0, 85.34, 0.87; GCA_019749805.1, s__Mycobacterium sp019749805, 95.0, 85.25, 0.849; GCF_010728925.1, s__Mycobacterium gadium, 95.0, 84.93, 0.87; GCF_000230895.2, s__Mycobacterium rhodesiae_A, 95.0, 84.25, 0.836; GCF_0107260…	42.44	11	0.99634	Genome not assigned to closest species as it falls outside its pre-defined ANI radius
SM1050_bin.51	d__Bacteria;p__Gemmatimonadota;c__Gemmatimonadetes;o__Gemmatimonadales;f__Gemmatimonadaceae;g__Fen-1231;s__	N/A	N/A	N/A	N/A	N/A	GCA_014192065.1	95	d__Bacteria;p__Gemmatimonadota;c__Gemmatimonadetes;o__Gemmatimonadales;f__Gemmatimonadaceae;g__Fen-1231;s__Fen-1231 sp014192065	77.99	0.43	d__Bacteria;p__Gemmatimonadota;c__Gemmatimonadetes;o__Gemmatimonadales;f__Gemmatimonadaceae;g__Fen-1231;s__	taxonomic classification defined by topology and ANI	classification based on placement in class-level tree	GCA_016874035.1, s__Fen-1231 sp016874035, 95.0, 78.38, 0.392; GCA_016194585.1, s__Fen-1231 sp016194585, 95.0, 78.01, 0.305; GCA_003171215.1, s__Fen-1231 sp003171215, 95.0, 77.84, 0.241; GCA_017881585.1, s__Fen-1231 sp017881585, 95.0, 77.83, 0.303; GCA_020851455.1, s__Fen-1231 sp020851455, 95.0, 77.56, 0.332; GCA_903882745.1, s__Fen-1231 sp903882745, 95.0, 77.35, 0.184; GCA_903876745.1, s__Fen-123…	88.22	11	0.92801	N/A
SM1050_bin.52	d__Bacteria;p__Nitrospirota;c__Nitrospiria;o__Nitrospirales;f__Nitrospiraceae;g__2-02-FULL-62-14;s__	N/A	N/A	N/A	N/A	N/A	GCA_001805245.1	95	d__Bacteria;p__Nitrospirota;c__Nitrospiria;o__Nitrospirales;f__Nitrospiraceae;g__2-02-FULL-62-14;s__2-02-FULL-62-14 sp001805245	85.3	0.743	d__Bacteria;p__Nitrospirota;c__Nitrospiria;o__Nitrospirales;f__Nitrospiraceae;g__2-02-FULL-62-14;s__	taxonomic classification defined by topology and ANI	classification based on placement in class-level tree	GCA_020028595.1, s__2-02-FULL-62-14 sp020028595, 95.0, 85.7, 0.841; GCA_009692155.1, s__2-02-FULL-62-14 sp009692155, 95.0, 85.36, 0.775	87.27	11	0.95951	Genome not assigned to closest species as it falls outside its pre-defined ANI radius
SM1050_bin.53	d__Bacteria;p__Pseudomonadota;c__Alphaproteobacteria;o__Sphingomonadales;f__Sphingomonadaceae;g__Allosphingosinicella;s__	N/A	N/A	N/A	N/A	N/A	GCA_005883305.1	95	d__Bacteria;p__Pseudomonadota;c__Alphaproteobacteria;o__Sphingomonadales;f__Sphingomonadaceae;g__Allosphingosinicella;s__Allosphingosinicella sp005883305	84.72	0.851	d__Bacteria;p__Pseudomonadota;c__Alphaproteobacteria;o__Sphingomonadales;f__Sphingomonadaceae;g__Allosphingosinicella;s__	taxonomic classification defined by topology and ANI	classification based on placement in class-level tree	GCA_019239785.1, s__Allosphingosinicella sp019239785, 95.0, 81.32, 0.669; GCA_019635535.1, s__Allosphingosinicella sp019635535, 95.0, 80.41, 0.632; GCA_003347635.1, s__Allosphingosinicella sp003347635, 95.0, 79.68, 0.64; GCF_007995055.1, s__Allosphingosinicella ginsenosidimutans, 95.0, 79.63, 0.624; GCA_023390415.1, s__Allosphingosinicella sp023390415, 95.0, 79.51, 0.534; GCF_011320075.1, s__Allo…	40.91	11	0.97107	Genome not assigned to closest species as it falls outside its pre-defined ANI radius
SM1050_bin.55	d__Bacteria;p__Pseudomonadota;c__Gammaproteobacteria;o__Legionellales;f__Legionellaceae;g__Tatlockia;s__	N/A	N/A	N/A	N/A	N/A	GCF_900637635.1	95	d__Bacteria;p__Pseudomonadota;c__Gammaproteobacteria;o__Legionellales;f__Legionellaceae;g__Tatlockia;s__Tatlockia jordanis	77.58	0.182	d__Bacteria;p__Pseudomonadota;c__Gammaproteobacteria;o__Legionellales;f__Legionellaceae;g__Tatlockia;s__	taxonomic classification defined by topology and ANI	classification based on placement in class-level tree	GCF_001467025.1, s__Tatlockia brunensis, 95.0, 77.88, 0.18; GCF_002240035.1, s__Tatlockia clemsonensis, 95.0, 77.77, 0.156; GCF_900187355.1, s__Tatlockia lansingensis, 95.0, 77.7, 0.197; GCF_000953655.1, s__Tatlockia hackeliae, 95.0, 77.67, 0.178; GCF_900640175.1, s__Tatlockia sp900640175, 95.0, 77.5, 0.115; GCF_001467745.1, s__Tatlockia jamestowniensis, 95.0, 77.5, 0.147; GCA_013697955.1, s__Tat…	96.74	11	0.97033	N/A
SM1050_bin.56	d__Bacteria;p__Pseudomonadota;c__Alphaproteobacteria;o__UBA9655;f__UBA9655;g__UBA9655;s__	N/A	N/A	N/A	N/A	N/A	N/A	N/A	N/A	N/A	N/A	d__Bacteria;p__Pseudomonadota;c__Alphaproteobacteria;o__UBA9655;f__UBA9655;g__UBA9655;s__	taxonomic classification defined by topology and ANI	classification based on placement in class-level tree	GCA_021731585.1, s__UBA9655 sp021731585, 95.0, 83.87, 0.675; GCA_019748065.1, s__UBA9655 sp019748065, 95.0, 83.15, 0.677; GCA_019746105.1, s__UBA9655 sp019746105, 95.0, 82.86, 0.609; GCA_019749915.1, s__UBA9655 sp019749915, 95.0, 82.84, 0.677; GCA_001767835.1, s__UBA9655 sp001767835, 95.0, 77.27, 0.268; GCA_017992885.1, s__UBA9655 sp017992885, 95.0, 77.22, 0.106; GCA_021809225.1, s__UBA9655 sp021…	95.25	11	0.97171	Genome not assigned to closest species as it falls outside its pre-defined ANI radius
SM1050_bin.57	d__Bacteria;p__Pseudomonadota;c__Alphaproteobacteria;o__ATCC43930;f__Stellaceae;g__AP-15;s__	N/A	N/A	N/A	N/A	N/A	GCA_945861155.1	95	d__Bacteria;p__Pseudomonadota;c__Alphaproteobacteria;o__ATCC43930;f__Stellaceae;g__AP-15;s__AP-15 sp945861155	81.9	0.71	d__Bacteria;p__Pseudomonadota;c__Alphaproteobacteria;o__ATCC43930;f__Stellaceae;g__AP-15;s__	taxonomic classification defined by topology and ANI	classification based on placement in class-level tree	GCA_005888515.1, s__AP-15 sp005888515, 95.0, 79.37, 0.478; GCA_005888425.1, s__AP-15 sp005888425, 95.0, 79.11, 0.409; GCA_019241915.1, s__AP-15 sp019241915, 95.0, 78.41, 0.376; GCA_019240125.1, s__AP-15 sp019240125, 95.0, 77.92, 0.446; GCA_005884825.1, s__AP-15 sp005884825, 95.0, 77.47, 0.271; GCA_019244535.1, s__AP-15 sp019244535, 95.0, 77.33, 0.306; GCA_019238055.1, s__AP-15 sp019238055, 95.0, …	54.24	11	0.9175	Genome not assigned to closest species as it falls outside its pre-defined ANI radius
SM1050_bin.58	d__Bacteria;p__Pseudomonadota;c__Gammaproteobacteria;o__UBA6186;f__UBA6186;g__JAGVLG01;s__	N/A	N/A	N/A	N/A	N/A	GCA_020054325.1	95	d__Bacteria;p__Pseudomonadota;c__Gammaproteobacteria;o__UBA6186;f__UBA6186;g__JAGVLG01;s__JAGVLG01 sp020054325	76.16	0.077	d__Bacteria;p__Pseudomonadota;c__Gammaproteobacteria;o__UBA6186;f__UBA6186;g__JAGVLG01;s__	taxonomic classification defined by topology and ANI	classification based on placement in class-level tree	N/A	72.35	11	0.8509	N/A
SM1050_bin.60	d__Bacteria;p__Planctomycetota;c__Planctomycetia;o__Gemmatales;f__Gemmataceae;g__;s__	N/A	N/A	N/A	N/A	N/A	N/A	N/A	N/A	N/A	N/A	d__Bacteria;p__Planctomycetota;c__Planctomycetia;o__Gemmatales;f__Gemmataceae;g__;s__	taxonomic classification fully defined by topology	classification based on placement in class-level tree	N/A	38.61	11	0.83176	N/A
SM1050_bin.61	d__Bacteria;p__Pseudomonadota;c__Gammaproteobacteria;o__Burkholderiales;f__Burkholderiaceae;g__Telluria;s__	N/A	N/A	N/A	N/A	N/A	N/A	N/A	N/A	N/A	N/A	d__Bacteria;p__Pseudomonadota;c__Gammaproteobacteria;o__Burkholderiales;f__Burkholderiaceae;g__Telluria;s__	taxonomic novelty determined using RED	classification based on placement in class-level tree	N/A	58.73	11	0.95043	Genome has more than 10.0% of markers with multiple hits
SM1050_bin.62	d__Bacteria;p__Planctomycetota;c__Planctomycetia;o__Gemmatales;f__Gemmataceae;g__;s__	N/A	N/A	N/A	N/A	N/A	N/A	N/A	N/A	N/A	N/A	d__Bacteria;p__Planctomycetota;c__Planctomycetia;o__Gemmatales;f__Gemmataceae;g__;s__	taxonomic classification fully defined by topology	classification based on placement in class-level tree	N/A	48.56	11	0.86536	N/A
SM1050_bin.8	d__Bacteria;p__Acidobacteriota;c__Vicinamibacteria;o__Vicinamibacterales;f__UBA2999;g__;s__	N/A	N/A	N/A	N/A	N/A	N/A	N/A	N/A	N/A	N/A	d__Bacteria;p__Acidobacteriota;c__Vicinamibacteria;o__Vicinamibacterales;f__UBA2999;g__;s__	taxonomic novelty determined using RED	classification based on placement in class-level tree	N/A	52.67	11	0.89967	N/A
SM1050_bin.9	d__Bacteria;p__Pseudomonadota;c__Gammaproteobacteria;o__Legionellales;f__Legionellaceae;g__Legionella;s__	N/A	N/A	N/A	N/A	N/A	GCF_000162755.2	95	d__Bacteria;p__Pseudomonadota;c__Gammaproteobacteria;o__Legionellales;f__Legionellaceae;g__Legionella;s__Legionella drancourtii	78.65	0.345	d__Bacteria;p__Pseudomonadota;c__Gammaproteobacteria;o__Legionellales;f__Legionellaceae;g__Legionella;s__	taxonomic classification defined by topology and ANI	classification based on placement in class-level tree	GCF_023921225.1, s__Legionella lytica, 95.0, 78.27, 0.27; GCF_900635815.1, s__Legionella cherrii, 95.0, 77.94, 0.2; GCF_000373765.1, s__Legionella shakespearei, 95.0, 77.85, 0.149; GCF_900156395.1, s__Legionella gormanii, 95.0, 77.82, 0.214; GCF_900639985.1, s__Legionella rowbothamii, 95.0, 77.77, 0.259; GCF_001465875.1, s__Legionella saoudiensis, 95.0, 77.75, 0.247; GCF_001648595.1, s__Legionell…	94.96	11	0.97141	N/A

## Sheet: MAG_checkM
Bin Id	Marker lineage	# genomes	# markers	# marker sets	Completeness	Contamination	Strain heterogeneity	Genome size (bp)	# ambiguous bases	# scaffolds	# contigs	N50 (scaffolds)	N50 (contigs)	Mean scaffold length (bp)	Mean contig length (bp)	Longest scaffold (bp)	Longest contig (bp)	GC	GC std (scaffolds > 1kbp)	Coding density	Translation table	# predicted genes	0	1	2	3	4	5+
SM1000_bin.1	k__Bacteria (UID1452)	924	161	108	55.1	0	0	638414	8587	747	747	10506	319	253	242	1297	1255	36.1	4.2	-100	-1	-1	69	92	0	0	0	0
SM1000_bin.10	o__Burkholderiales (UID4000)	193	427	214	92.26	4.57	20	4410875	35446	4442	4442	66750	357	310	302	2085	2052	34.7	4.35	-100	-1	-1	64	348	15	0	0	0
SM1000_bin.11	o__Rhizobiales (UID3447)	356	416	249	86.23	0.94	66.67	2972999	20948	3045	3045	19267	355	293	286	2854	2795	34.5	5.6	-100	-1	-1	71	342	3	0	0	0
SM1000_bin.12	o__Burkholderiales (UID4000)	193	427	214	77.81	2.84	58.33	2981287	26123	3163	3163	10867	340	292	284	2002	1930	33.2	5.51	-100	-1	-1	111	304	12	0	0	0
SM1000_bin.13	k__Bacteria (UID203)	5449	103	57	57.89	1.75	0	3368449	28676	3458	3458	7865	349	290	282	2840	2760	35.8	4.69	-100	-1	-1	65	37	1	0	0	0
SM1000_bin.15	k__Bacteria (UID203)	5449	101	57	63.16	1.75	0	5340726	47523	4971	4971	7516	396	317	307	2538	2390	34.1	5.3	-100	-1	-1	59	41	1	0	0	0
SM1000_bin.16	k__Bacteria (UID2982)	88	229	147	79.4	3.4	40	4350891	45183	4053	4053	18239	403	323	312	4231	3942	37	4.97	-100	-1	-1	69	155	5	0	0	0
SM1000_bin.17	k__Bacteria (UID203)	5449	104	58	62.88	1.72	100	3741027	56460	3455	3455	22629	392	323	306	2925	2799	36.9	5.58	-100	-1	-1	59	44	1	0	0	0
SM1000_bin.18	p__Bacteroidetes (UID2591)	364	303	203	85.8	3.71	63.64	4097129	62286	3598	3598	70594	403	341	323	3670	3418	36.7	5.37	-100	-1	-1	65	227	11	0	0	0
SM1000_bin.19	k__Bacteria (UID2565)	2921	142	87	60.71	5.75	42.86	6144939	45078	5908	5908	4998	396	307	300	2553	2520	35.8	6.02	-100	-1	-1	53	84	4	1	0	0
SM1000_bin.2	k__Bacteria (UID1452)	924	161	108	66.14	9.75	65	2128420	13773	2552	2552	5436	332	262	256	2337	2246	33.1	6.08	-100	-1	-1	52	93	14	2	0	0
SM1000_bin.21	c__Gammaproteobacteria (UID4443)	356	451	270	72.25	3.33	90.91	3401729	38701	3386	3386	10024	387	312	301	3982	3715	34.7	5.79	-100	-1	-1	160	280	11	0	0	0
SM1000_bin.22	k__Bacteria (UID2495)	2993	143	89	76.01	2.25	0	730290	8127	787	787	24625	350	278	268	1439	1370	35.4	4.23	-100	-1	-1	26	115	2	0	0	0
SM1000_bin.24	k__Bacteria (UID2982)	88	229	147	82.06	2.18	40	3534604	36317	3025	3025	23842	443	355	343	3319	3071	35.9	4.95	-100	-1	-1	60	164	5	0	0	0
SM1000_bin.25	k__Bacteria (UID2495)	2993	147	91	85.51	3.3	0	3288511	22122	3054	3054	30472	407	337	330	4775	4701	35.7	5.13	-100	-1	-1	40	103	4	0	0	0
SM1000_bin.26	k__Bacteria (UID203)	5449	104	58	68.97	1.72	100	3991623	34436	4160	4160	9745	337	284	275	2256	2174	34.6	5.44	-100	-1	-1	54	49	1	0	0	0
SM1000_bin.27	k__Bacteria (UID203)	5449	104	58	62.07	5.17	0	4398680	37147	3927	3927	11178	412	336	326	7012	6653	33.7	4.61	-100	-1	-1	62	38	4	0	0	0
SM1000_bin.28	k__Bacteria (UID2495)	2993	147	91	91.61	5.49	62.5	2970488	19263	2863	2863	44292	388	321	314	3978	3757	35.5	4.63	-100	-1	-1	20	119	8	0	0	0
SM1000_bin.3	k__Bacteria (UID2495)	2993	147	91	74.98	3.3	33.33	3090771	26239	3185	3185	9253	384	305	297	1521	1491	34	5.52	-100	-1	-1	56	88	3	0	0	0
SM1000_bin.30	c__Gammaproteobacteria (UID4266)	1097	269	171	98.83	0.58	0	2306536	29772	2072	2072	74351	403	335	321	4585	4320	35	5.91	-100	-1	-1	3	265	0	0	1	0
SM1000_bin.31	k__Bacteria (UID2495)	2993	143	89	84.2	0	0	1084650	14094	1026	1026	59035	382	324	310	2072	1972	34.3	7.2	-100	-1	-1	15	128	0	0	0	0
SM1000_bin.32	k__Bacteria (UID3187)	2258	188	117	93.54	6.41	11.11	6444272	35764	6000	6000	21609	418	339	333	2730	2686	34.7	4.98	-100	-1	-1	19	162	6	1	0	0
SM1000_bin.34	k__Bacteria (UID203)	5449	104	58	53.45	0	0	795358	9434	874	874	7743	346	272	261	1149	1113	33.3	2.43	-100	-1	-1	63	41	0	0	0	0
SM1000_bin.35	c__Gammaproteobacteria (UID4202)	67	481	276	90.63	2.43	30.77	3320238	30064	3185	3185	24670	400	329	320	2128	2081	34.7	5.05	-100	-1	-1	81	387	13	0	0	0
SM1000_bin.36	k__Bacteria (UID2982)	88	227	146	85.81	4.11	50	2738134	21849	2686	2686	8781	384	304	295	8287	7665	32.3	7.83	-100	-1	-1	39	180	8	0	0	0
SM1000_bin.38	k__Bacteria (UID203)	5449	104	58	72.88	2.59	50	3940615	34081	3959	3959	11354	387	312	304	2852	2785	33.4	5.28	-100	-1	-1	53	49	2	0	0	0
SM1000_bin.39	k__Bacteria (UID2570)	433	273	183	97.8	1.64	0	3711077	52753	3206	3206	682736	452	357	341	2487	2254	37.1	5.52	-100	-1	-1	5	265	3	0	0	0
SM1000_bin.4	k__Bacteria (UID1452)	924	151	101	57.45	0	0	1057699	10450	1172	1172	13232	345	281	272	5098	4761	34.1	7.42	-100	-1	-1	56	95	0	0	0	0
SM1000_bin.40	k__Bacteria (UID2495)	2993	147	91	82.74	1.1	0	2891628	18063	2708	2708	65318	394	327	320	5988	5738	35.2	4.78	-100	-1	-1	48	98	1	0	0	0
SM1000_bin.42	k__Bacteria (UID203)	5449	104	58	79.48	6.9	25	6535071	56560	5670	5670	50637	435	362	352	7960	7830	33.4	4.92	-100	-1	-1	47	53	4	0	0	0
SM1000_bin.43	k__Bacteria (UID2565)	2921	152	93	71.37	9.14	50	3048422	20434	3442	3442	5257	350	276	270	1506	1448	36.1	5.76	-100	-1	-1	58	78	16	0	0	0
SM1000_bin.44	k__Bacteria (UID203)	5449	104	58	54.65	8.86	44.44	2535870	20044	3047	3047	6742	319	266	260	1707	1685	35.3	6.02	-100	-1	-1	63	33	3	5	0	0
SM1000_bin.46	c__Betaproteobacteria (UID3959)	235	419	211	62.03	7.47	6.06	2874913	23822	3235	3235	7391	333	270	262	1550	1503	36	3.4	-100	-1	-1	160	226	33	0	0	0
SM1000_bin.47	k__Bacteria (UID203)	5449	104	58	59.48	1.72	100	2960388	53985	2988	2988	4921	381	306	288	1956	1770	35.9	5.48	-100	-1	-1	66	37	1	0	0	0
SM1000_bin.48	c__Betaproteobacteria (UID3959)	235	419	211	92.57	1.52	16.67	3573677	30443	3457	3457	36403	375	313	304	2896	2839	36.2	4.41	-100	-1	-1	65	348	6	0	0	0
SM1000_bin.49	p__Bacteroidetes (UID2591)	364	303	203	96.03	5.67	68.42	4500153	68664	3895	3895	74178	407	344	327	3379	3165	36.8	5.79	-100	-1	-1	41	243	19	0	0	0
SM1000_bin.5	k__Bacteria (UID203)	5449	104	58	80.46	0	0	900920	11209	909	909	459795	358	292	280	2366	2190	35.6	4.42	-100	-1	-1	13	91	0	0	0	0
SM1000_bin.51	p__Bacteroidetes (UID2591)	364	303	203	68.99	1.15	25	2060459	36047	2264	2264	4938	356	283	267	2496	2228	36.7	3.01	-100	-1	-1	104	195	4	0	0	0
SM1000_bin.53	k__Bacteria (UID203)	5449	103	57	60.85	0	0	2614926	16622	2869	2869	13359	355	288	282	2181	2114	32.8	4.92	-100	-1	-1	62	41	0	0	0	0
SM1000_bin.54	k__Bacteria (UID203)	5449	104	58	66.51	0	0	493179	6534	586	586	9176	332	256	245	3088	2846	36.9	4.69	-100	-1	-1	24	80	0	0	0	0
SM1000_bin.56	k__Bacteria (UID2495)	2993	143	89	73.44	8.37	18.18	7923744	52922	7388	7388	8672	430	341	334	3246	3202	33.5	5.42	-100	-1	-1	33	101	8	1	0	0
SM1000_bin.57	f__Enterobacteriaceae (UID5124)	134	1173	336	55.29	0.35	62.5	2504633	28202	2758	2758	4314	343	274	264	1946	1806	35.5	7.47	-100	-1	-1	512	653	8	0	0	0
SM1000_bin.6	k__Bacteria (UID203)	5449	103	57	79.3	0	0	1518420	16235	1484	1484	16944	376	306	296	2736	2630	34.9	7.6	-100	-1	-1	49	54	0	0	0	0
SM1000_bin.7	p__Bacteroidetes (UID2591)	364	303	203	96.52	6.27	70.59	4443371	72245	3934	3934	78290	403	337	319	4025	3678	36.6	5.25	-100	-1	-1	10	276	17	0	0	0
SM1000_bin.9	p__Bacteroidetes (UID2591)	364	303	203	90.7	8.74	34.78	3905292	62778	3663	3663	17013	381	319	302	2104	2017	36.7	6.38	-100	-1	-1	44	238	20	1	0	0
SM1002_bin.1	k__Bacteria (UID203)	5449	104	58	60.34	0.86	100	2317371	12157	2489	2489	6444	363	288	283	1742	1628	34	5.44	-100	-1	-1	62	41	1	0	0	0
SM1002_bin.10	k__Bacteria (UID1452)	924	161	108	67.7	2.78	33.33	3737461	20196	3818	3818	4726	375	300	294	2087	2048	36.8	3.73	-100	-1	-1	63	95	3	0	0	0
SM1002_bin.11	p__Actinobacteria (UID1454)	732	199	116	56.41	8.19	0	2308520	13621	2566	2566	8593	342	277	271	1251	1193	35.2	4.95	-100	-1	-1	96	94	8	1	0	0
SM1002_bin.12	f__Xanthomonadaceae (UID4214)	55	659	290	90.74	0.72	14.29	3353591	24818	3212	3212	19407	383	315	308	2849	2692	33.9	4.59	-100	-1	-1	119	533	7	0	0	0
SM1002_bin.13	c__Betaproteobacteria (UID3971)	223	425	211	64.8	2.64	0	2312524	18646	2529	2529	11438	347	294	287	2066	2019	35.4	5.82	-100	-1	-1	144	270	11	0	0	0
SM1002_bin.14	k__Bacteria (UID203)	5449	104	58	61.9	1.72	0	3790560	23381	3689	3689	16289	377	319	312	3743	3633	34.6	5.57	-100	-1	-1	61	42	1	0	0	0
SM1002_bin.15	k__Bacteria (UID203)	5449	104	58	55.52	0	0	2396935	14628	2779	2779	8409	339	274	269	2150	2087	34.9	4.31	-100	-1	-1	64	40	0	0	0	0
SM1002_bin.16	k__Bacteria (UID203)	5449	104	58	82.76	5.8	0	1395535	15134	1497	1497	6149	352	275	265	1394	1351	36.5	7.61	-100	-1	-1	13	67	20	4	0	0
SM1002_bin.17	k__Bacteria (UID2565)	2921	143	87	73.99	0	0	5498492	51860	4314	4314	10231	467	371	359	6152	5829	35.9	5.9	-100	-1	-1	44	99	0	0	0	0
SM1002_bin.18	c__Betaproteobacteria (UID3959)	235	419	211	79.27	2.21	16.67	3671462	27771	3931	3931	14120	331	285	278	2566	2510	35.6	2.85	-100	-1	-1	109	300	9	1	0	0
SM1002_bin.19	k__Bacteria (UID2495)	2993	147	91	74.73	2.2	0	3931243	27234	3653	3653	11338	412	326	319	2874	2829	32.9	5.69	-100	-1	-1	43	102	2	0	0	0
SM1002_bin.2	k__Bacteria (UID203)	5449	104	58	64.14	0	0	5124471	30896	5214	5214	13344	352	297	291	2687	2600	33.8	4.43	-100	-1	-1	60	44	0	0	0	0
SM1002_bin.21	k__Bacteria (UID203)	5449	104	58	56.19	6.9	42.86	5457701	49779	5072	5072	10259	422	342	332	3974	3743	33.7	4.87	-100	-1	-1	64	35	4	1	0	0
SM1002_bin.22	k__Bacteria (UID1453)	901	171	117	81.67	0	0	4351721	23579	4342	4342	31552	372	311	306	2182	2145	33.5	4.72	-100	-1	-1	26	145	0	0	0	0
SM1002_bin.23	k__Bacteria (UID203)	5449	104	58	67.24	0	0	981028	13945	1020	1020	6893	354	296	282	1578	1452	34.3	8.85	-100	-1	-1	58	46	0	0	0	0
SM1002_bin.24	k__Bacteria (UID203)	5449	103	57	56.94	1.75	100	2074986	13362	2281	2281	12554	353	287	281	2058	1956	32.8	4.09	-100	-1	-1	62	40	1	0	0	0
SM1002_bin.25	k__Bacteria (UID203)	5449	103	57	50.18	0	0	1189238	6560	1446	1446	4386	335	261	257	1252	1211	32.7	2.76	-100	-1	-1	66	37	0	0	0	0
SM1002_bin.26	k__Bacteria (UID203)	5449	104	58	61.21	3.04	100	2582195	23665	2640	2640	12524	385	309	300	1454	1422	33.1	5.09	-100	-1	-1	48	49	6	1	0	0
SM1002_bin.27	o__Burkholderiales (UID4000)	193	427	214	75.46	6.46	40	2839363	20997	3158	3159	6257	342	279	272	2058	2024	33.2	5.41	-100	-1	-1	120	282	25	0	0	0
SM1002_bin.28	k__Bacteria (UID2495)	2993	147	91	69.36	9.89	45.45	3444511	29189	3469	3469	9376	387	309	301	1909	1822	34.4	4.65	-100	-1	-1	73	65	8	1	0	0
SM1002_bin.29	k__Bacteria (UID203)	5449	104	58	74.29	0.86	0	9149336	73973	8128	8128	32426	439	346	337	2707	2601	33.6	5.47	-100	-1	-1	52	51	1	0	0	0
SM1002_bin.3	k__Bacteria (UID2565)	2921	143	87	52.99	3.79	62.5	4488499	42202	4371	4371	4818	396	295	286	3115	2944	37.3	6.6	-100	-1	-1	53	82	8	0	0	0
SM1002_bin.32	k__Bacteria (UID2565)	2921	152	93	54.04	2.15	0	2289016	8873	2260	2260	5415	400	312	308	1762	1740	34.7	5.03	-100	-1	-1	76	74	2	0	0	0
SM1002_bin.34	o__Rhizobiales (UID3654)	92	481	319	70.7	3.55	7.69	2919420	19017	3271	3271	6708	330	265	259	1611	1574	34.5	5.45	-100	-1	-1	168	300	13	0	0	0
SM1002_bin.36	k__Bacteria (UID203)	5449	104	58	74.14	0.34	100	2842470	21907	2765	2765	13590	405	325	317	2056	1948	33.6	5.6	-100	-1	-1	50	53	1	0	0	0
SM1002_bin.37	o__Rhodospirillales (UID3754)	63	336	201	78.65	2.24	33.33	4166680	32621	4251	4251	29807	355	305	297	2835	2775	35.6	7.69	-100	-1	-1	82	248	6	0	0	0
SM1002_bin.38	k__Bacteria (UID2495)	2993	147	91	92.31	1.1	0	2695023	19539	2569	2569	127628	405	336	328	3082	2894	34.6	4.48	-100	-1	-1	23	123	1	0	0	0
SM1002_bin.39	k__Bacteria (UID2495)	2993	147	91	72.65	8.79	0	3219839	25315	3401	3401	7100	377	296	289	1541	1477	33.8	5.18	-100	-1	-1	56	82	9	0	0	0
SM1002_bin.4	k__Bacteria (UID2982)	88	230	148	93.75	0.68	0	1746875	19011	1727	1727	43780	370	315	304	1998	1931	38	6.79	-100	-1	-1	12	217	1	0	0	0
SM1002_bin.40	k__Bacteria (UID203)	5449	104	58	60.34	0	0	4275133	33932	3545	3545	54496	455	379	369	10325	9665	33.6	5.72	-100	-1	-1	62	42	0	0	0	0
SM1002_bin.42	o__Rhizobiales (UID3642)	107	485	316	50.14	8.84	8.33	3983621	27661	4337	4337	4686	328	276	270	1669	1598	34.2	6.04	-100	-1	-1	230	217	33	5	0	0
SM1002_bin.43	k__Bacteria (UID203)	5449	104	58	55.52	1.72	0	3158552	18190	3307	3307	9381	357	297	292	2074	2005	34.3	5.14	-100	-1	-1	65	38	1	0	0	0
SM1002_bin.44	f__Xanthomonadaceae (UID4214)	55	659	290	96.74	2.75	71.43	3817900	32099	3567	3567	32034	390	321	312	4254	4177	34.8	4.32	-100	-1	-1	56	589	14	0	0	0
SM1002_bin.45	k__Bacteria (UID203)	5449	104	58	66.55	5.17	0	4860410	38862	4519	4519	13279	420	335	326	2768	2699	32.5	6.16	-100	-1	-1	60	40	4	0	0	0
SM1002_bin.46	k__Bacteria (UID203)	5449	104	58	53.79	5.17	50	3594330	28616	4105	4105	5935	322	253	246	2196	2152	33.6	5.43	-100	-1	-1	67	33	4	0	0	0
SM1002_bin.48	k__Bacteria (UID2495)	2993	143	89	80.37	2.85	10	3516470	24421	3622	3622	9060	380	311	304	2943	2882	34.5	5.21	-100	-1	-1	30	103	10	0	0	0
SM1002_bin.49	c__Alphaproteobacteria (UID3305)	564	348	229	80.67	5.9	52.94	5625508	38239	5606	5606	12918	356	302	295	2197	2114	35.3	10.62	-100	-1	-1	61	272	14	1	0	0
SM1002_bin.5	k__Bacteria (UID203)	5449	104	58	74.31	8.62	57.14	7615253	67995	7282	7282	15891	414	327	317	4886	4710	34	5.09	-100	-1	-1	51	46	7	0	0	0
SM1002_bin.51	k__Bacteria (UID203)	5449	104	58	55.52	3.45	100	5066502	36613	5674	5674	6574	326	275	268	1836	1779	34.4	5.56	-100	-1	-1	66	36	2	0	0	0
SM1002_bin.52	k__Bacteria (UID203)	5449	104	58	74.14	5.17	0	3699785	28395	3530	3530	23789	415	330	322	4422	4253	33.7	5.6	-100	-1	-1	48	53	3	0	0	0
SM1002_bin.6	k__Bacteria (UID203)	5449	104	58	62.93	0.86	100	3396688	23345	3627	3627	6280	339	278	272	1634	1601	35.3	6.67	-100	-1	-1	61	42	1	0	0	0
SM1002_bin.7	k__Bacteria (UID1452)	924	161	108	53.7	8.95	46.15	1891799	11293	2162	2162	6678	349	279	274	2257	2190	32.5	5.21	-100	-1	-1	86	64	10	1	0	0
SM1002_bin.8	o__Burkholderiales (UID4000)	193	427	214	61.5	5.61	4.55	3856227	30032	4246	4246	4855	342	283	276	1661	1635	33	5.68	-100	-1	-1	186	223	16	2	0	0
SM1002_bin.9	k__Bacteria (UID203)	5449	104	58	51.72	8.62	0	2405561	17041	2597	2597	17064	364	299	293	1880	1840	34	5.49	-100	-1	-1	67	31	6	0	0	0
SM1004_bin.1	k__Bacteria (UID2329)	174	149	89	62.1	0	0	544601	7946	566	566	57674	380	297	282	1476	1365	37.8	3.23	-100	-1	-1	46	103	0	0	0	0
SM1004_bin.10	k__Bacteria (UID203)	5449	104	58	53.45	9.48	37.5	5287925	33701	5690	5690	4430	334	272	266	1466	1438	34.1	6.34	-100	-1	-1	65	31	8	0	0	0
SM1004_bin.11	c__Betaproteobacteria (UID3959)	235	419	211	52.56	6.13	6.45	3632956	33268	4135	4135	4617	320	270	262	1946	1887	35.4	6.89	-100	-1	-1	208	182	28	1	0	0
SM1004_bin.12	k__Bacteria (UID3187)	2258	188	117	79.38	3.67	11.11	5806886	28025	5848	5848	7161	367	303	298	2762	2749	36.5	4.42	-100	-1	-1	30	149	9	0	0	0
SM1004_bin.13	p__Bacteroidetes (UID2591)	364	303	203	96.63	0	0	3117620	51812	3025	3025	28510	396	317	300	4141	3807	36.9	5.32	-100	-1	-1	10	293	0	0	0	0
SM1004_bin.14	o__Rickettsiales (UID3809)	83	324	211	51.18	2.29	14.29	787392	10762	828	828	9130	338	278	265	1903	1771	34.6	7.51	-100	-1	-1	149	168	7	0	0	0
SM1004_bin.15	k__Bacteria (UID203)	5449	102	58	58.62	0	0	1195479	16549	1289	1289	6206	349	287	274	1726	1612	34.8	3.71	-100	-1	-1	65	37	0	0	0	0
SM1004_bin.16	k__Bacteria (UID203)	5449	104	58	52.8	1.72	0	592490	8872	675	675	9580	337	272	259	1866	1705	38.2	8.61	-100	-1	-1	48	55	1	0	0	0
SM1004_bin.17	k__Bacteria (UID1452)	924	161	108	60.15	0	0	803315	8990	886	886	545400	347	273	263	3066	2881	35.6	4.7	-100	-1	-1	49	112	0	0	0	0
SM1004_bin.18	o__Burkholderiales (UID4000)	193	427	214	83.14	0.93	0	3487066	26496	3555	3555	10887	353	307	299	2826	2760	35.6	6.03	-100	-1	-1	74	350	3	0	0	0
SM1004_bin.19	c__Alphaproteobacteria (UID3305)	564	349	230	87.42	2.81	18.18	4860000	43730	5244	5244	8368	333	275	266	2757	2661	34.9	4.41	-100	-1	-1	47	291	11	0	0	0
SM1004_bin.2	c__Gammaproteobacteria (UID4266)	1097	270	172	90.12	2.81	14.29	2042061	29641	2024	2024	21244	383	313	298	4205	4001	34.6	7.92	-100	-1	-1	60	203	7	0	0	0
SM1004_bin.20	k__Bacteria (UID203)	5449	104	58	75.13	1.72	0	1292936	17971	1414	1414	27171	349	267	254	1861	1712	36.9	3.3	-100	-1	-1	18	85	1	0	0	0
SM1004_bin.21	k__Bacteria (UID1452)	924	151	101	68.81	1.05	50	1068062	10577	1201	1201	11653	356	272	263	3381	3199	35	7.06	-100	-1	-1	36	111	4	0	0	0
SM1004_bin.23	k__Bacteria (UID2982)	88	230	148	98.24	4.05	0	8519465	91979	6764	6764	31864	470	373	360	5303	4919	36.2	5.26	-100	-1	-1	6	217	7	0	0	0
SM1004_bin.24	k__Bacteria (UID203)	5449	104	58	51.9	8.62	20	3104108	14542	3745	3745	3732	332	262	258	1652	1636	33.8	5.89	-100	-1	-1	67	32	5	0	0	0
SM1004_bin.27	k__Bacteria (UID203)	5449	104	58	50.69	6.9	75	7082692	41495	6874	6874	41184	380	321	315	2848	2792	34.9	5.21	-100	-1	-1	71	29	4	0	0	0
SM1004_bin.28	k__Bacteria (UID203)	5449	103	57	50.88	3.51	50	1736228	12215	1984	1984	4176	341	269	263	1756	1632	36.8	5.87	-100	-1	-1	70	31	2	0	0	0
SM1004_bin.29	k__Bacteria (UID3187)	2258	188	117	89.41	4.17	25	4896407	36532	4430	4430	16711	437	351	343	3273	3067	33.3	5.37	-100	-1	-1	19	161	8	0	0	0
SM1004_bin.3	k__Bacteria (UID1452)	924	163	110	56.89	7.73	55.56	4245684	34792	4293	4293	4619	373	301	293	3043	2978	33.7	6.14	-100	-1	-1	82	72	9	0	0	0
SM1004_bin.30	k__Bacteria (UID1453)	901	171	117	58.6	1.71	14.29	4763268	28974	4822	4822	16301	389	302	296	2107	2089	35.6	4.99	-100	-1	-1	69	100	1	0	1	0
SM1004_bin.31	c__Gammaproteobacteria (UID4266)	1097	270	172	82.85	1.74	0	2941397	43618	2617	2617	9719	410	323	306	4347	4067	33.9	6.45	-100	-1	-1	63	202	5	0	0	0
SM1004_bin.32	k__Bacteria (UID203)	5449	104	58	61.94	0	0	2311881	18289	2707	2707	5081	330	273	267	1622	1590	33.9	4.45	-100	-1	-1	55	49	0	0	0	0
SM1004_bin.33	k__Bacteria (UID2495)	2993	147	91	59.28	0	0	2013712	13283	2118	2118	10223	386	306	300	2022	1957	34.1	5.33	-100	-1	-1	60	87	0	0	0	0
SM1004_bin.34	k__Bacteria (UID1452)	924	151	101	76.73	0.99	0	1053566	10683	1031	1031	1053566	387	312	302	2816	2650	33.9	2.67	-100	-1	-1	27	123	1	0	0	0
SM1004_bin.35	k__Bacteria (UID2495)	2993	143	89	68.13	1.12	0	709950	9370	745	745	7802	354	292	279	1267	1225	34.7	4.61	-100	-1	-1	45	97	1	0	0	0
SM1004_bin.38	c__Alphaproteobacteria (UID3305)	564	349	230	54.07	0.43	100	1488773	13591	1767	1767	4443	323	258	251	2821	2737	35.2	5.44	-100	-1	-1	140	207	2	0	0	0
SM1004_bin.39	k__Bacteria (UID2982)	88	230	148	78.9	2.03	0	1300149	13720	1302	1302	10711	379	310	300	1843	1754	37.9	5.53	-100	-1	-1	37	189	4	0	0	0
SM1004_bin.4	k__Bacteria (UID203)	5449	104	58	54.81	0	0	1852940	13936	2120	2120	10022	340	281	274	1829	1784	34.6	5.65	-100	-1	-1	65	39	0	0	0	0
SM1004_bin.40	k__Bacteria (UID203)	5449	104	58	57.71	3.45	50	2052502	16905	2351	2351	5079	317	265	257	2718	2660	34.5	5.13	-100	-1	-1	60	42	2	0	0	0
SM1004_bin.41	k__Bacteria (UID1453)	901	171	117	64.36	2.56	33.33	660522	6157	784	784	25250	340	255	247	2295	2222	35.5	3.92	-100	-1	-1	45	123	3	0	0	0
SM1004_bin.42	k__Bacteria (UID203)	5449	104	58	59.48	1.72	0	3147149	20694	3094	3094	7143	396	318	311	1566	1543	32.4	5.69	-100	-1	-1	67	36	1	0	0	0
SM1004_bin.43	k__Bacteria (UID2982)	88	230	148	71.08	0.68	0	1347633	13703	1313	1313	13595	382	310	300	1869	1812	36.3	6.33	-100	-1	-1	81	148	1	0	0	0
SM1004_bin.44	k__Bacteria (UID203)	5449	104	58	63.79	0	0	1175461	16066	1108	1108	10654	402	325	310	4728	4502	34.2	7.64	-100	-1	-1	62	42	0	0	0	0
SM1004_bin.5	c__Deltaproteobacteria (UID3216)	83	247	155	61.38	2.94	0	1756155	19753	1934	1934	4514	354	286	276	1454	1402	37	7.35	-100	-1	-1	106	135	6	0	0	0
SM1004_bin.6	k__Bacteria (UID3187)	2258	188	117	94.41	5.13	0	6167001	49754	5000	5000	137400	457	384	374	4057	3906	34.9	4.95	-100	-1	-1	27	156	4	1	0	0
SM1004_bin.8	k__Bacteria (UID203)	5449	104	58	50.31	0	0	2128347	17538	2311	2311	6388	324	277	269	1722	1657	34.3	4.28	-100	-1	-1	69	35	0	0	0	0
SM1004_bin.9	k__Bacteria (UID2565)	2921	143	88	87.69	0.17	0	3072442	26215	2698	2698	8944	434	343	333	3704	3545	33.6	5.48	-100	-1	-1	13	128	2	0	0	0
SM1005_bin.1	k__Archaea (UID2)	207	145	103	85.92	1.29	50	1868713	31274	2176	2176	6707	299	225	210	1265	1213	40.6	6.16	-100	-1	-1	20	123	2	0	0	0
SM1005_bin.10	k__Bacteria (UID2565)	2921	143	88	92.55	5.11	20	9254635	72148	7875	7875	17410	433	340	331	2945	2876	36.6	6.01	-100	-1	-1	8	130	5	0	0	0
SM1005_bin.11	k__Bacteria (UID2495)	2993	147	91	57.23	2.2	0	3138428	28589	3036	3036	4315	391	304	294	2625	2545	36.4	4.99	-100	-1	-1	76	69	2	0	0	0
SM1005_bin.12	k__Bacteria (UID1452)	924	151	101	76.73	2.97	66.67	917795	11120	930	930	40128	376	301	289	3035	2834	35.3	6.82	-100	-1	-1	25	123	3	0	0	0
SM1005_bin.13	k__Bacteria (UID2982)	88	230	148	70.48	2.7	40	2197779	20320	2052	2052	5424	395	321	311	4994	4631	35	3.44	-100	-1	-1	84	141	5	0	0	0
SM1005_bin.14	c__Gammaproteobacteria (UID4266)	1097	270	172	76.3	6.49	0	1755045	24642	1771	1771	7351	381	305	291	2236	2128	34.3	6.83	-100	-1	-1	79	178	13	0	0	0
SM1005_bin.15	k__Bacteria (UID3187)	2258	188	117	60.2	9.92	27.78	4895246	43079	4961	4961	5188	398	309	301	3053	2752	33.5	6.22	-100	-1	-1	78	96	12	2	0	0
SM1005_bin.17	k__Bacteria (UID203)	5449	104	58	63.43	0	0	3347078	24420	3846	3846	6162	323	272	266	2700	2647	34.1	6.62	-100	-1	-1	59	45	0	0	0	0
SM1005_bin.18	c__Gammaproteobacteria (UID4266)	1097	269	171	96.78	0.19	0	3017709	43380	2900	2900	27715	389	308	293	3646	3444	35.8	6.95	-100	-1	-1	7	261	1	0	0	0
SM1005_bin.19	k__Bacteria (UID203)	5449	104	58	60.19	7.92	0	816936	10092	950	950	6084	335	269	258	1460	1390	35.9	5.61	-100	-1	-1	26	70	8	0	0	0
SM1005_bin.2	k__Bacteria (UID1453)	901	171	117	94.79	0.85	0	2064191	27254	1830	1830	89250	413	356	341	9023	8619	35.7	7.62	-100	-1	-1	7	163	1	0	0	0
SM1005_bin.20	k__Bacteria (UID203)	5449	103	57	51.71	7.02	75	6534161	60893	6619	6619	8952	356	291	282	4332	4225	36	6.5	-100	-1	-1	65	34	4	0	0	0
SM1005_bin.21	k__Bacteria (UID203)	5449	104	58	53.79	0	0	1952492	14576	2161	2161	6081	325	280	274	1829	1795	35.4	7.68	-100	-1	-1	67	37	0	0	0	0
SM1005_bin.22	k__Bacteria (UID203)	5449	104	58	55.17	1.72	0	3277029	25751	3046	3046	9961	408	326	317	1672	1617	33.6	4.99	-100	-1	-1	64	39	1	0	0	0
SM1005_bin.23	c__Gammaproteobacteria (UID4266)	1097	270	172	91.82	0.19	0	1950725	26777	1833	1833	69731	396	326	312	4149	3682	32.5	6.79	-100	-1	-1	16	253	1	0	0	0
SM1005_bin.24	k__Bacteria (UID203)	5449	104	58	74.14	2.59	50	1964582	28095	2039	2039	9608	369	296	282	2272	2151	34.9	6.06	-100	-1	-1	54	48	2	0	0	0
SM1005_bin.25	p__Bacteroidetes (UID2591)	364	302	202	58.75	4.46	88.89	2938198	56605	2770	2770	4717	400	322	301	2357	2189	41.2	6.58	-100	-1	-1	99	194	9	0	0	0
SM1005_bin.26	k__Bacteria (UID203)	5449	104	58	57.59	3.45	100	1835192	18536	1830	1830	7745	366	302	292	1950	1838	36.1	5.5	-100	-1	-1	63	39	2	0	0	0
SM1005_bin.27	k__Bacteria (UID1452)	924	151	101	67	0.2	100	794160	11379	912	912	19841	354	265	252	2152	1977	35.9	3.72	-100	-1	-1	36	114	1	0	0	0
SM1005_bin.28	k__Bacteria (UID203)	5449	104	58	67.24	0	0	2384109	20716	2393	2393	12261	360	302	293	2919	2835	35.7	4.48	-100	-1	-1	58	46	0	0	0	0
SM1005_bin.29	c__Gammaproteobacteria (UID4266)	1097	270	172	80.28	1.6	0	1335419	16696	1299	1299	15546	385	310	298	2487	2350	35.2	5.42	-100	-1	-1	65	200	5	0	0	0
SM1005_bin.3	k__Bacteria (UID2495)	2993	147	91	56.5	3.85	25	1843170	11453	2012	2012	7267	362	292	286	2026	1954	35.1	5.24	-100	-1	-1	80	63	4	0	0	0
SM1005_bin.31	k__Bacteria (UID1452)	924	151	101	61.21	0.99	100	844341	8218	909	909	10802	363	281	272	2870	2682	34.1	7.25	-100	-1	-1	55	95	1	0	0	0
SM1005_bin.32	k__Bacteria (UID203)	5449	104	58	66.9	0	0	1176347	16652	1294	1294	6962	347	276	263	1863	1751	33	6.82	-100	-1	-1	56	48	0	0	0	0
SM1005_bin.33	k__Bacteria (UID1452)	924	161	108	50.93	4.01	12.5	728047	8898	857	857	7939	333	253	243	1462	1365	36.4	2.91	-100	-1	-1	70	85	5	1	0	0
SM1005_bin.34	k__Bacteria (UID2982)	88	230	148	76.67	0.68	0	2540445	22991	2341	2341	29488	402	329	319	2887	2693	34.5	4.75	-100	-1	-1	76	153	1	0	0	0
SM1005_bin.35	k__Bacteria (UID3187)	2258	188	117	59.49	6.05	23.44	4822927	38903	4441	4441	15167	420	345	336	3318	3186	33.6	5.26	-100	-1	-1	90	86	5	1	1	5
SM1005_bin.36	k__Bacteria (UID2495)	2993	147	91	59.79	1.93	10	2913982	27675	3091	3091	7528	366	293	284	1379	1347	33.5	4.74	-100	-1	-1	61	76	10	0	0	0
SM1005_bin.38	k__Bacteria (UID2565)	2921	143	88	65.52	1.14	0	2247387	12409	2262	2262	4935	390	314	308	2013	1996	37	5.17	-100	-1	-1	63	79	1	0	0	0
SM1005_bin.39	o__Burkholderiales (UID4000)	193	427	214	70.33	2.73	25	3795845	28390	4145	4145	8953	337	287	280	1879	1845	33.8	4.82	-100	-1	-1	171	248	8	0	0	0
SM1005_bin.4	c__Gammaproteobacteria (UID4266)	1097	270	172	90.12	1.55	0	2488085	40267	2275	2275	19095	394	323	305	2435	2246	34.6	7.32	-100	-1	-1	61	205	4	0	0	0
SM1005_bin.41	k__Bacteria (UID1452)	924	151	101	60.7	2.31	33.33	875151	11224	987	987	13813	337	275	263	1122	1083	35.2	3.57	-100	-1	-1	55	93	3	0	0	0
SM1005_bin.42	k__Bacteria (UID1453)	901	171	117	59.25	4.27	100	1929537	13432	2236	2236	5679	336	273	267	1914	1870	36.3	5.03	-100	-1	-1	63	102	6	0	0	0
SM1005_bin.43	k__Bacteria (UID2495)	2993	147	91	80.92	2.2	0	3094763	29011	3089	3089	18230	386	315	305	2885	2825	33.1	5.51	-100	-1	-1	47	98	2	0	0	0
SM1005_bin.44	k__Bacteria (UID1453)	901	171	117	57.95	0.17	0	960666	9143	1105	1105	27186	335	255	247	1465	1416	35.5	3.07	-100	-1	-1	56	114	1	0	0	0
SM1005_bin.45	k__Bacteria (UID203)	5449	103	58	57.93	9.83	22.22	1272071	7640	1575	1575	4245	318	256	251	2022	1938	32.7	3.33	-100	-1	-1	63	31	9	0	0	0
SM1005_bin.46	p__Actinobacteria (UID1454)	732	199	116	64.99	0.86	0	2058392	10572	2249	2249	12059	344	283	278	1396	1370	34.6	3.76	-100	-1	-1	79	119	1	0	0	0
SM1005_bin.47	c__Alphaproteobacteria (UID3305)	564	349	230	67.32	1.59	20	1142012	10379	1235	1235	7440	353	269	261	2708	2478	36.6	7.2	-100	-1	-1	105	239	5	0	0	0
SM1005_bin.48	k__Bacteria (UID2982)	88	230	148	84.21	4.05	0	5839835	57466	5139	5139	11881	417	341	330	3128	2924	35.6	5.38	-100	-1	-1	42	183	4	1	0	0
SM1005_bin.49	k__Bacteria (UID2495)	2993	147	91	76.36	3.85	50	1522815	14647	1771	1771	6946	330	266	258	1196	1167	34.7	5.86	-100	-1	-1	47	96	4	0	0	0
SM1005_bin.5	k__Bacteria (UID3187)	2258	188	117	79.8	4.27	0	3927191	25309	3679	3679	24973	415	341	334	1994	1974	34.4	5.58	-100	-1	-1	59	124	5	0	0	0
SM1005_bin.50	o__Burkholderiales (UID4000)	193	427	214	81.18	1.75	25	4021549	29371	4242	4242	16613	350	299	293	3308	3265	34	5.33	-100	-1	-1	128	291	8	0	0	0
SM1005_bin.51	c__Gammaproteobacteria (UID4266)	1097	270	172	81.57	0.97	0	1655021	19589	1608	1608	8947	396	316	304	3860	3721	34.3	8.24	-100	-1	-1	78	191	0	0	0	1
SM1005_bin.53	k__Bacteria (UID203)	5449	104	58	86.21	4.47	0	1278377	14554	1322	1322	27462	376	286	275	1479	1400	31.8	10.3	-100	-1	-1	8	82	14	0	0	0
SM1005_bin.55	k__Archaea (UID2)	207	145	103	86.89	9.22	0	1127093	14063	1230	1230	57669	322	254	243	1271	1221	40.6	5.34	-100	-1	-1	17	113	15	0	0	0
SM1005_bin.56	k__Bacteria (UID203)	5449	104	58	50.17	1.72	0	4788810	42860	4725	4725	8264	400	317	308	2839	2773	34.1	5.94	-100	-1	-1	66	37	1	0	0	0
SM1005_bin.57	k__Bacteria (UID203)	5449	104	58	60.31	7.92	66.67	3289534	49527	3550	3550	3715	347	277	264	1858	1745	37	6.03	-100	-1	-1	59	39	6	0	0	0
SM1005_bin.58	k__Bacteria (UID1453)	901	171	117	57.35	3.18	28.57	668248	5762	833	833	6201	311	244	237	1116	1073	32.8	2.7	-100	-1	-1	58	106	7	0	0	0
SM1005_bin.59	k__Bacteria (UID1453)	901	171	117	59.54	0.85	0	812648	7850	888	888	57375	367	276	267	4558	4310	35.1	4.39	-100	-1	-1	57	113	1	0	0	0
SM1005_bin.6	k__Bacteria (UID2495)	2993	147	91	76.2	1.1	0	2230637	19506	2035	2035	11626	390	329	319	2904	2846	36.3	5.48	-100	-1	-1	57	89	1	0	0	0
SM1005_bin.60	k__Bacteria (UID1452)	924	151	101	51.43	9.9	47.62	3401860	22014	3768	3768	9155	348	284	278	2586	2530	32.9	4.64	-100	-1	-1	81	63	3	2	2	0
SM1005_bin.61	p__Bacteroidetes (UID2591)	364	303	203	93.61	2.22	33.33	4254417	64508	3793	3793	33482	403	334	317	3633	3360	36.9	5.66	-100	-1	-1	50	247	6	0	0	0
SM1005_bin.62	k__Bacteria (UID1452)	924	151	101	73.76	0.99	0	988760	9318	961	961	235420	387	317	307	3778	3559	34.7	6.04	-100	-1	-1	31	119	1	0	0	0
SM1005_bin.63	k__Bacteria (UID203)	5449	104	58	54.66	1.72	0	5024652	38706	5335	5335	14405	339	287	280	2582	2530	35.1	6.07	-100	-1	-1	68	35	1	0	0	0
SM1005_bin.64	k__Bacteria (UID203)	5449	103	57	50.88	0	0	2943643	22080	3017	3017	5392	389	309	302	2130	1998	34.9	6.38	-100	-1	-1	68	35	0	0	0	0
SM1005_bin.65	c__Alphaproteobacteria (UID3305)	564	349	230	84.66	2.35	33.33	2734890	20105	2795	2795	31642	375	298	290	4496	4193	35.1	6.25	-100	-1	-1	76	264	9	0	0	0
SM1005_bin.66	c__Gammaproteobacteria (UID4266)	1097	270	172	91.86	2.71	0	2657368	38583	2327	2327	29198	415	345	328	4084	3670	33.3	6.79	-100	-1	-1	32	231	6	0	0	1
SM1005_bin.67	k__Bacteria (UID2565)	2921	143	87	52.51	6.09	54.55	5166214	54210	4579	4579	3958	447	335	323	3875	3676	36.1	5.49	-100	-1	-1	74	58	11	0	0	0
SM1005_bin.68	k__Bacteria (UID203)	5449	104	58	51.9	8.62	0	3814822	27782	4093	4093	6512	346	285	278	2125	2094	33.8	5.15	-100	-1	-1	67	31	6	0	0	0
SM1005_bin.69	k__Bacteria (UID1452)	924	161	108	56.35	9.58	3.85	5123575	40028	5542	5542	3619	357	276	269	2545	2498	36.6	5.85	-100	-1	-1	75	68	14	4	0	0
SM1005_bin.70	k__Bacteria (UID2565)	2921	143	88	53.41	4.92	14.29	4863581	35314	4670	4670	5349	409	314	306	2124	2049	35.7	6.21	-100	-1	-1	69	69	4	1	0	0
SM1005_bin.71	k__Bacteria (UID1452)	924	151	101	61.18	3.96	50	979770	7391	1027	1027	14207	369	287	279	3178	2929	33.3	7.57	-100	-1	-1	50	97	4	0	0	0
SM1005_bin.72	o__Burkholderiales (UID4000)	193	427	214	64.71	7.82	13.33	3959683	34847	4363	4364	4443	340	278	270	2043	1984	33	4.51	-100	-1	-1	173	224	30	0	0	0
SM1005_bin.8	o__Rickettsiales (UID3809)	83	324	211	56.23	3.87	8.33	1194707	17311	1171	1171	19150	354	300	286	2567	2352	34.8	8.47	-100	-1	-1	146	168	9	1	0	0
SM1005_bin.9	k__Bacteria (UID203)	5449	104	58	58.62	6.03	40	2008799	15659	2219	2219	9229	323	283	276	1550	1513	35.4	6.64	-100	-1	-1	64	35	5	0	0	0
SM1028_bin.10	k__Bacteria (UID2982)	88	230	148	96.28	0.68	0	1881350	19669	1819	1819	125612	376	317	306	2909	2811	38.2	5.75	-100	-1	-1	6	223	1	0	0	0
SM1028_bin.11	f__Rhizobiaceae (UID3563)	81	808	337	96.25	2.37	14.29	4848466	41471	4670	4670	137695	358	304	295	2830	2729	34.6	5.2	-100	-1	-1	25	762	21	0	0	0
SM1028_bin.12	k__Bacteria (UID2495)	2993	147	91	52.06	1.1	0	1756062	13337	1726	1726	19298	397	325	317	2583	2552	33.2	3.57	-100	-1	-1	79	67	1	0	0	0
SM1028_bin.13	k__Bacteria (UID203)	5449	104	58	70.69	0	0	3750786	34554	4037	4037	8588	335	275	266	2140	2056	35.2	4.93	-100	-1	-1	53	51	0	0	0	0
SM1028_bin.15	k__Bacteria (UID203)	5449	104	58	68.42	1.72	0	3997176	33269	3581	3581	28771	421	349	340	2454	2342	33.7	6.07	-100	-1	-1	52	51	1	0	0	0
SM1028_bin.16	k__Bacteria (UID203)	5449	104	58	52.59	1.72	100	3015822	23195	2762	2762	34449	426	344	335	3073	3013	33.2	4.97	-100	-1	-1	68	35	1	0	0	0
SM1028_bin.17	c__Alphaproteobacteria (UID3305)	564	349	230	52.89	2.17	57.14	1528298	10290	1797	1797	6387	328	258	252	1954	1842	34.3	4.17	-100	-1	-1	184	158	7	0	0	0
SM1028_bin.18	k__Bacteria (UID1453)	901	171	117	77.45	1.71	0	2293785	12168	2543	2543	5908	360	280	275	1514	1487	36.3	5.3	-100	-1	-1	41	128	2	0	0	0
SM1028_bin.19	k__Bacteria (UID203)	5449	103	57	63.16	3.51	0	2405789	14905	2555	2555	29984	367	298	292	5697	5462	32.5	4.05	-100	-1	-1	61	40	2	0	0	0
SM1028_bin.2	k__Bacteria (UID203)	5449	104	58	50.17	0	0	1366975	8309	1654	1654	5025	328	262	257	1172	1129	35.2	5.02	-100	-1	-1	68	36	0	0	0	0
SM1028_bin.22	c__Betaproteobacteria (UID3971)	223	425	211	87.05	7.56	25.81	3368605	26280	3722	3722	16591	348	291	284	1846	1822	35.1	5.2	-100	-1	-1	59	337	28	1	0	0
SM1028_bin.24	k__Bacteria (UID2565)	2921	143	88	53.07	1.42	33.33	5892942	41304	5905	5905	3994	395	302	295	2936	2880	36.8	5.83	-100	-1	-1	78	62	3	0	0	0
SM1028_bin.26	c__Gammaproteobacteria (UID4266)	1097	270	172	94.19	1.55	33.33	1845363	23567	1740	1740	19653	392	320	306	2563	2493	34.3	7.91	-100	-1	-1	12	249	9	0	0	0
SM1028_bin.3	c__Betaproteobacteria (UID3971)	223	425	211	86.18	4.39	12	3668567	28495	4120	4120	14578	338	286	279	2091	1992	34.7	4.85	-100	-1	-1	81	325	16	3	0	0
SM1028_bin.30	c__Gammaproteobacteria (UID4266)	1097	270	172	88.95	2.62	16.67	2301874	33358	2203	2203	11965	382	314	299	2785	2665	33.2	7.09	-100	-1	-1	64	200	6	0	0	0
SM1028_bin.31	c__Alphaproteobacteria (UID3422)	26	529	308	69.21	5.42	42.86	2145262	16914	2379	2379	5069	344	282	274	1455	1395	34.8	6.04	-100	-1	-1	186	315	28	0	0	0
SM1028_bin.32	o__Burkholderiales (UID4000)	193	427	214	76.7	4.4	21.43	3119493	25023	3507	3507	7254	331	279	272	2001	1957	34.4	4.34	-100	-1	-1	129	284	14	0	0	0
SM1028_bin.33	o__Rhizobiales (UID3642)	107	485	316	51.63	4.19	11.76	1943919	15648	2328	2328	4398	308	252	245	1202	1177	33.9	5.33	-100	-1	-1	237	231	17	0	0	0
SM1028_bin.35	k__Bacteria (UID203)	5449	103	57	50.24	6.63	22.22	4620772	43568	4378	4378	4354	407	305	295	2637	2572	37.2	5.24	-100	-1	-1	41	44	18	0	0	0
SM1028_bin.36	k__Bacteria (UID203)	5449	104	58	78.45	1.72	100	4795381	42225	4314	4314	15879	427	344	334	2779	2722	34	6.35	-100	-1	-1	52	51	1	0	0	0
SM1028_bin.37	k__Bacteria (UID2495)	2993	147	91	75.32	4.4	25	2809727	21302	2668	2668	40015	406	330	322	1546	1507	33.8	5.34	-100	-1	-1	56	87	4	0	0	0
SM1028_bin.38	k__Bacteria (UID1452)	924	161	108	88.08	1.85	100	2473584	14331	2618	2618	14272	363	293	288	2161	2098	34.2	4.94	-100	-1	-1	25	134	2	0	0	0
SM1028_bin.4	k__Bacteria (UID203)	5449	104	58	53.45	1.72	0	3831855	33199	3721	3721	6367	402	325	316	2210	2137	33.4	5.29	-100	-1	-1	69	34	1	0	0	0
SM1028_bin.40	k__Bacteria (UID203)	5449	104	58	64.26	0	0	5861362	49456	5193	5193	10415	444	356	347	2905	2843	33.5	5.04	-100	-1	-1	54	50	0	0	0	0
SM1028_bin.5	c__Alphaproteobacteria (UID3422)	26	529	308	98.99	5.81	14.29	2789151	20867	2633	2633	103568	385	329	321	2597	2467	34	5.15	-100	-1	-1	9	494	25	1	0	0
SM1028_bin.6	k__Bacteria (UID2565)	2921	143	88	53.28	1.2	0	4119702	29868	3867	3867	5368	400	313	305	1877	1806	35.6	6.07	-100	-1	-1	79	62	2	0	0	0
SM1028_bin.7	k__Bacteria (UID203)	5449	104	58	82.76	2.59	100	4493137	28770	4111	4111	30944	428	349	342	2741	2686	34.3	5.01	-100	-1	-1	44	58	2	0	0	0
SM1028_bin.9	o__Burkholderiales (UID4000)	193	426	214	82.16	4.8	30	4772523	34326	5126	5126	6849	344	289	282	2056	2033	33	4.84	-100	-1	-1	101	305	20	0	0	0
SM1030_bin.1	o__Burkholderiales (UID4000)	193	427	214	92.18	3.13	0	5198717	38690	4799	4799	27913	385	322	314	3478	3358	34.1	4.73	-100	-1	-1	77	338	12	0	0	0
SM1030_bin.12	k__Bacteria (UID2565)	2921	152	93	93.6	3.76	0	3738450	19773	3144	3144	72484	445	366	359	2436	2419	37.2	5.47	-100	-1	-1	13	135	4	0	0	0
SM1030_bin.13	k__Archaea (UID2)	207	145	103	53.57	4.48	50	805639	10238	1047	1047	4262	283	215	205	1268	1222	39.8	0.85	-100	-1	-1	66	67	12	0	0	0
SM1030_bin.14	k__Archaea (UID2)	207	145	103	67.64	0.97	0	1109685	15293	1353	1353	26508	316	252	241	1201	1152	37.5	7.73	-100	-1	-1	38	106	1	0	0	0
SM1030_bin.17	k__Bacteria (UID1452)	924	151	101	90.59	0.99	0	1474455	19881	1466	1466	42411	373	298	285	4224	3977	37.2	5.25	-100	-1	-1	10	140	1	0	0	0
SM1030_bin.18	k__Bacteria (UID1452)	924	160	109	58.69	0	0	646532	8002	680	680	47900	364	291	280	3486	3259	36.6	4.76	-100	-1	-1	49	111	0	0	0	0
SM1030_bin.19	k__Bacteria (UID1452)	924	161	108	63.32	0.93	0	4333209	24165	4674	4674	9695	355	284	279	3700	3609	34.3	5.74	-100	-1	-1	73	87	1	0	0	0
SM1030_bin.2	k__Bacteria (UID2982)	88	230	148	72.14	2.03	0	4832795	47540	4378	4378	9559	414	333	322	2667	2584	37.4	5.29	-100	-1	-1	57	170	3	0	0	0
SM1030_bin.20	k__Bacteria (UID2565)	2921	141	86	78.8	0	0	7005510	67422	6476	6476	7991	410	315	305	4123	4018	39.1	5.8	-100	-1	-1	24	117	0	0	0	0
SM1030_bin.21	o__Burkholderiales (UID4000)	193	427	214	90.59	4.89	15.62	4756270	37287	4570	4570	26649	368	322	314	3126	3041	35.6	6.16	-100	-1	-1	51	354	17	5	0	0
SM1030_bin.22	k__Bacteria (UID1453)	901	171	117	93.64	1.28	0	5521558	33646	5492	5492	37141	383	313	307	4855	4811	36	5.53	-100	-1	-1	17	152	2	0	0	0
SM1030_bin.23	k__Bacteria (UID1452)	924	161	108	52.48	8.38	40	1541003	9838	1904	1904	3881	330	256	251	2230	2145	32.7	5.71	-100	-1	-1	74	72	15	0	0	0
SM1030_bin.24	k__Bacteria (UID2982)	88	230	148	87.5	0.56	100	2003404	24533	1999	1999	17191	384	313	300	2332	2126	37.7	7.18	-100	-1	-1	36	192	2	0	0	0
SM1030_bin.25	p__Bacteroidetes (UID2605)	350	316	210	65.25	2.06	0	2112653	36272	2100	2100	5019	380	308	291	2217	2059	40.7	6.29	-100	-1	-1	111	200	5	0	0	0
SM1030_bin.26	k__Bacteria (UID3187)	2258	188	117	76.92	2.56	66.67	4322508	29961	3946	3946	11641	425	343	335	10730	10293	32.6	5.53	-100	-1	-1	52	133	3	0	0	0
SM1030_bin.27	k__Bacteria (UID2495)	2993	147	91	79.51	5.49	40	3649170	34822	3742	3742	9143	378	303	294	2033	1948	33.4	6.47	-100	-1	-1	58	84	5	0	0	0
SM1030_bin.28	k__Bacteria (UID2495)	2993	143	89	68.51	0	0	542580	6561	621	621	15757	333	258	247	1200	1156	36.9	5.58	-100	-1	-1	42	101	0	0	0	0
SM1030_bin.29	o__Burkholderiales (UID4000)	193	427	214	97.04	2.2	28.57	4678147	40231	4458	4458	106349	374	321	312	8689	8265	34.1	5.04	-100	-1	-1	26	394	7	0	0	0
SM1030_bin.3	k__Bacteria (UID1452)	924	161	108	92.59	3.19	0	7983335	50279	7001	7001	18678	415	335	327	4663	4554	37	4.56	-100	-1	-1	12	143	5	1	0	0
SM1030_bin.30	k__Bacteria (UID2982)	88	230	148	90.2	0.68	0	1578081	18734	1586	1586	16744	370	308	296	1882	1816	38.6	7.63	-100	-1	-1	16	213	1	0	0	0
SM1030_bin.31	k__Bacteria (UID1453)	901	171	117	54.02	0	0	570218	6686	623	623	15618	352	278	267	1206	1155	36.1	3.3	-100	-1	-1	62	109	0	0	0	0
SM1030_bin.32	k__Bacteria (UID2982)	88	230	148	95.95	4.36	12.5	8826366	93994	7265	7265	37420	473	358	345	5825	5457	36.4	5.42	-100	-1	-1	6	216	8	0	0	0
SM1030_bin.33	k__Bacteria (UID1452)	924	161	108	73.61	0.93	0	1043709	10611	1027	1027	265063	382	311	301	2812	2633	34	3.91	-100	-1	-1	32	128	1	0	0	0
SM1030_bin.34	k__Bacteria (UID2565)	2921	141	86	61.81	1.16	0	6214085	48802	5768	5768	4917	423	319	310	2841	2775	37	5.41	-100	-1	-1	50	89	2	0	0	0
SM1030_bin.36	p__Proteobacteria (UID3214)	2231	190	119	85.36	1.68	50	1902759	22257	1876	1876	9517	375	310	298	1942	1874	33.5	7.27	-100	-1	-1	55	133	2	0	0	0
SM1030_bin.37	o__Burkholderiales (UID4000)	193	427	214	79.77	1.17	0	2681919	20618	2646	2646	17051	363	318	310	1996	1855	35.8	5.1	-100	-1	-1	123	301	3	0	0	0
SM1030_bin.38	k__Bacteria (UID2565)	2921	152	93	54.17	0	0	2969024	16635	3049	3049	4840	389	303	298	2221	2140	34	5.31	-100	-1	-1	72	80	0	0	0	0
SM1030_bin.39	k__Bacteria (UID2570)	433	274	183	98.91	1.64	20	4297825	57848	3912	3912	19446	402	336	321	3467	3280	37.4	5.24	-100	-1	-1	4	265	5	0	0	0
SM1030_bin.4	c__Gammaproteobacteria (UID4202)	67	481	276	90.63	5.28	45.45	3292200	29210	3255	3255	18678	388	320	311	2524	2470	34.7	4.39	-100	-1	-1	78	381	22	0	0	0
SM1030_bin.40	k__Bacteria (UID203)	5449	103	58	59.75	9.23	94.44	729275	9500	839	839	22560	314	255	244	1373	1307	39.9	6.28	-100	-1	-1	41	44	18	0	0	0
SM1030_bin.41	k__Bacteria (UID1452)	924	161	108	61	0.62	0	1057195	10165	1147	1147	19797	353	272	263	2107	2000	35.1	4.66	-100	-1	-1	48	111	2	0	0	0
SM1030_bin.42	k__Bacteria (UID203)	5449	104	58	56.43	2.66	14.29	3617781	27946	3596	3596	5718	391	306	298	2039	1985	33.5	5.57	-100	-1	-1	55	42	7	0	0	0
SM1030_bin.43	p__Bacteroidetes (UID2605)	350	316	210	87.1	0.33	50	2681777	46366	2499	2499	11694	391	325	307	3864	3393	37.9	5.02	-100	-1	-1	56	258	2	0	0	0
SM1030_bin.44	k__Bacteria (UID2982)	88	230	148	90.37	0	0	1502122	15431	1388	1388	69158	394	335	324	2044	1982	35.6	10	-100	-1	-1	18	212	0	0	0	0
SM1030_bin.45	c__Deltaproteobacteria (UID3216)	83	247	155	56.75	1.29	50	1482634	16476	1690	1690	4236	340	276	266	1410	1347	36.7	8.35	-100	-1	-1	106	139	2	0	0	0
SM1030_bin.48	k__Bacteria (UID3187)	2258	188	117	64.3	5.13	12.5	3314727	36395	3395	3395	9745	388	312	301	2068	1960	35.2	4.92	-100	-1	-1	59	121	8	0	0	0
SM1030_bin.5	k__Bacteria (UID203)	5449	104	58	62.57	6.9	20	4231893	32402	4453	4453	17308	351	305	298	2848	2784	35	7.45	-100	-1	-1	59	40	5	0	0	0
SM1030_bin.50	k__Bacteria (UID1452)	924	151	101	77.39	2.97	0	1113360	11060	1116	1116	320972	378	308	298	2433	2288	34.1	5.41	-100	-1	-1	25	123	3	0	0	0
SM1030_bin.51	k__Bacteria (UID2565)	2921	143	88	85.69	2.27	0	9217473	87593	7299	7299	19410	461	370	358	7811	7337	35.6	5.37	-100	-1	-1	17	124	2	0	0	0
SM1030_bin.53	k__Bacteria (UID3187)	2258	188	117	75.19	8.12	10	5119893	41110	4846	4846	8811	422	328	319	2926	2817	33.6	5.52	-100	-1	-1	48	130	10	0	0	0
SM1030_bin.54	k__Bacteria (UID2495)	2993	147	91	90.81	3.3	66.67	2314289	22058	2179	2179	16344	385	321	311	2096	1958	35.8	5.43	-100	-1	-1	18	126	3	0	0	0
SM1030_bin.55	k__Bacteria (UID2982)	88	230	148	81.1	5.41	10	2297529	26671	2129	2129	8621	408	336	323	8005	7733	39.6	7.04	-100	-1	-1	65	157	7	1	0	0
SM1030_bin.56	k__Bacteria (UID203)	5449	104	58	53.45	0	0	2650547	15998	2486	2486	18909	408	334	327	2842	2799	35.6	4.32	-100	-1	-1	68	36	0	0	0	0
SM1030_bin.57	k__Bacteria (UID203)	5449	104	58	55.8	8.62	0	2823182	22036	3516	3516	4817	308	247	241	1233	1192	32.5	4.14	-100	-1	-1	55	43	6	0	0	0
SM1030_bin.58	k__Bacteria (UID1452)	924	163	110	89.09	5.61	11.11	7580251	81578	7341	7341	8637	374	299	288	2674	2495	33.5	5.18	-100	-1	-1	12	144	6	1	0	0
SM1030_bin.60	k__Bacteria (UID203)	5449	104	58	67.22	0	0	494364	6529	577	577	9811	331	254	243	1130	1046	38	4.56	-100	-1	-1	34	70	0	0	0	0
SM1030_bin.61	k__Bacteria (UID1453)	901	171	117	60.94	0	0	1064219	11724	1060	1060	243832	378	298	287	5857	5512	35	4.31	-100	-1	-1	51	120	0	0	0	0
SM1030_bin.62	k__Bacteria (UID3187)	2258	188	117	60.77	8.83	33.33	4760434	34349	4233	4233	10313	430	342	334	2825	2768	34.2	5.64	-100	-1	-1	89	87	12	0	0	0
SM1030_bin.64	c__Gammaproteobacteria (UID4266)	1097	270	172	73.84	1.6	50	1611563	24442	1751	1751	6692	353	287	273	1743	1650	33.5	8.58	-100	-1	-1	107	159	4	0	0	0
SM1030_bin.65	o__Burkholderiales (UID4000)	193	427	214	98.56	6.38	20.69	4769834	41381	4510	4510	78470	359	317	308	3395	3193	34.3	4.85	-100	-1	-1	4	396	26	1	0	0
SM1030_bin.66	k__Bacteria (UID203)	5449	104	58	57.76	0	0	938021	13217	921	921	5309	379	308	293	2035	1960	34.9	6.87	-100	-1	-1	66	38	0	0	0	0
SM1030_bin.67	k__Bacteria (UID3187)	2258	188	117	87.13	5.13	16.67	7740352	68514	6616	6616	40307	454	368	357	5644	5450	33	5.75	-100	-1	-1	32	150	6	0	0	0
SM1030_bin.68	k__Bacteria (UID2495)	2993	147	91	93.55	4.46	20	3717706	31798	3228	3228	135543	426	363	353	3840	3728	34	6.3	-100	-1	-1	33	109	5	0	0	0
SM1030_bin.69	k__Bacteria (UID2982)	88	230	148	74.57	2.7	0	1590317	17568	1660	1660	9185	357	298	288	2088	1983	37	5.17	-100	-1	-1	58	166	6	0	0	0
SM1030_bin.7	k__Bacteria (UID1453)	901	171	117	60.26	0	0	790507	7942	891	891	17006	341	272	263	2962	2784	35	4.62	-100	-1	-1	58	113	0	0	0	0
SM1030_bin.72	p__Bacteroidetes (UID2605)	350	316	210	97.94	0.71	0	4109120	68536	3724	3724	117715	392	330	312	3073	2858	35.7	4.93	-100	-1	-1	5	309	2	0	0	0
SM1030_bin.73	k__Bacteria (UID2495)	2993	147	91	68.8	6.44	0	3237911	27211	3313	3313	4704	383	303	294	3104	3050	34.1	5.24	-100	-1	-1	58	78	11	0	0	0
SM1030_bin.74	k__Bacteria (UID1453)	901	171	117	55.28	3.09	60	751703	10629	873	873	7764	335	263	250	2570	2383	37.6	5.25	-100	-1	-1	68	98	5	0	0	0
SM1030_bin.77	k__Bacteria (UID3187)	2258	188	117	78.8	2.67	0	5464026	33697	5528	5528	13580	372	307	301	2945	2894	35.2	5.25	-100	-1	-1	42	141	5	0	0	0
SM1030_bin.78	k__Bacteria (UID2982)	88	230	148	89.89	2.25	50	1740446	19430	1762	1762	9551	372	306	295	1995	1921	37.9	7.05	-100	-1	-1	52	174	4	0	0	0
SM1030_bin.79	k__Bacteria (UID2565)	2921	143	88	66.63	3.41	33.33	5612365	40015	5322	5322	5320	414	317	310	2121	1964	35.8	6.65	-100	-1	-1	48	92	3	0	0	0
SM1030_bin.8	k__Archaea (UID2)	207	149	107	76.64	0.93	0	802938	11112	898	898	52705	349	281	268	4135	3665	36.2	5.82	-100	-1	-1	27	121	1	0	0	0
SM1030_bin.80	k__Bacteria (UID237)	5415	105	59	66.1	3.95	0	8497721	66823	7616	7616	8128	430	343	334	3343	3294	35.9	5.83	-100	-1	-1	43	59	3	0	0	0
SM1030_bin.81	k__Bacteria (UID3187)	2258	188	117	93.68	6.03	0	6368851	50913	5169	5169	245387	457	382	372	5905	5652	34.9	4.82	-100	-1	-1	15	166	6	1	0	0
SM1030_bin.82	k__Bacteria (UID2982)	88	227	146	50.48	4.03	27.27	3627557	33688	3563	3563	3805	402	313	303	1618	1587	32.1	4.79	-100	-1	-1	117	101	8	1	0	0
SM1030_bin.83	c__Gammaproteobacteria (UID4266)	1097	270	172	53.24	9.16	0	2712307	34530	2913	2913	3290	355	274	263	1541	1490	34.7	6.61	-100	-1	-1	127	122	21	0	0	0
SM1030_bin.84	k__Bacteria (UID1453)	901	171	117	53.53	8.55	16.67	3167169	19943	3651	3651	4432	326	267	262	1865	1832	34.1	3.68	-100	-1	-1	88	73	9	1	0	0
SM1030_bin.85	k__Bacteria (UID1452)	924	151	101	51.09	3.8	0	3437033	20183	3941	3941	3422	339	252	247	1370	1348	34.6	4.06	-100	-1	-1	74	71	5	1	0	0
SM1030_bin.86	c__Betaproteobacteria (UID3959)	235	419	211	70.35	5.13	33.33	4299070	39886	4494	4494	7156	333	294	285	3328	3198	35.4	5.98	-100	-1	-1	123	280	15	1	0	0
SM1030_bin.87	k__Bacteria (UID2565)	2921	141	86	51.64	4.65	0	3827787	27942	3720	3720	5059	389	300	293	2007	1954	35.6	6.15	-100	-1	-1	71	65	5	0	0	0
SM1030_bin.9	k__Bacteria (UID203)	5449	104	58	72.36	0.16	0	835152	11939	932	932	24652	336	271	259	1306	1209	40	4.09	-100	-1	-1	28	75	1	0	0	0
SM1031_bin.1	c__Betaproteobacteria (UID3959)	235	419	211	78.67	0.56	75	3331054	32125	3451	3451	14891	328	295	286	2343	2258	34.7	4.67	-100	-1	-1	85	330	4	0	0	0
SM1031_bin.10	c__Alphaproteobacteria (UID3422)	26	529	308	80.27	1.24	60	2346913	17931	2376	2376	11526	374	309	301	2383	2232	34.2	5.39	-100	-1	-1	139	385	5	0	0	0
SM1031_bin.11	k__Bacteria (UID1452)	924	151	101	57	1.08	50	728914	7253	809	809	6321	354	279	270	1606	1519	34.6	5.31	-100	-1	-1	58	91	2	0	0	0
SM1031_bin.12	k__Bacteria (UID203)	5449	104	58	56.35	0	0	2788474	22066	2786	2786	7670	403	321	313	2770	2732	33.2	4.6	-100	-1	-1	63	41	0	0	0	0
SM1031_bin.13	k__Bacteria (UID2495)	2993	147	91	70.88	0.55	100	2247145	14054	2382	2382	8440	366	290	284	1952	1886	35	4.58	-100	-1	-1	63	83	1	0	0	0
SM1031_bin.14	p__Bacteroidetes (UID2591)	364	303	203	61.73	4.19	20	2480719	38394	2594	2594	6146	365	284	269	2251	2139	37	2.95	-100	-1	-1	135	158	10	0	0	0
SM1031_bin.15	p__Bacteroidetes (UID2605)	350	316	210	97.38	1.05	42.86	4670284	79056	4180	4180	248918	399	333	314	2650	2457	35.5	5.27	-100	-1	-1	6	303	7	0	0	0
SM1031_bin.16	k__Bacteria (UID2565)	2921	152	93	51.49	0	0	1323242	9518	1519	1519	4655	347	270	264	1409	1366	36.3	4.16	-100	-1	-1	79	73	0	0	0	0
SM1031_bin.17	c__Betaproteobacteria (UID3971)	223	425	211	78.71	6.14	42.86	2701577	21438	3192	3192	7372	327	273	266	2127	2088	35.1	4.37	-100	-1	-1	96	310	18	1	0	0
SM1031_bin.18	o__Burkholderiales (UID4000)	193	427	214	83.05	0.51	50	3168696	27856	3313	3313	11132	344	296	288	2053	2001	33.2	5.78	-100	-1	-1	102	317	8	0	0	0
SM1031_bin.19	k__Bacteria (UID203)	5449	104	58	50.17	0	0	2998415	39506	2910	2910	8960	377	307	293	1541	1457	34.5	4.82	-100	-1	-1	69	35	0	0	0	0
SM1031_bin.2	k__Bacteria (UID3187)	2258	188	117	90.33	6.27	18.18	7471011	84585	6614	6614	24189	431	348	336	3027	2944	35.6	4.61	-100	-1	-1	21	161	5	0	1	0
SM1031_bin.20	c__Alphaproteobacteria (UID3305)	564	349	230	89.86	0.87	50	2966094	26986	3037	3037	21368	368	302	293	3569	3326	34.2	4.63	-100	-1	-1	46	301	2	0	0	0
SM1031_bin.21	k__Bacteria (UID2982)	88	230	148	80.62	2.03	66.67	2961189	28389	2655	2655	8666	411	332	322	3498	3282	35.1	4.58	-100	-1	-1	49	178	3	0	0	0
SM1031_bin.22	c__Gammaproteobacteria (UID4266)	1097	270	172	90.66	2.01	33.33	1798821	24760	1817	1817	10873	385	308	294	2814	2522	32.4	5.97	-100	-1	-1	18	246	6	0	0	0
SM1031_bin.23	c__Betaproteobacteria (UID3959)	235	419	211	92.37	5.23	6.45	3379824	29676	3314	3314	22066	371	309	300	13303	12656	36.2	3.72	-100	-1	-1	21	367	31	0	0	0
SM1031_bin.24	o__Burkholderiales (UID4000)	193	427	214	52.1	1.32	25	2658597	23318	2979	2979	5140	317	271	263	1627	1490	34.4	4.43	-100	-1	-1	241	182	4	0	0	0
SM1031_bin.25	k__Bacteria (UID203)	5449	104	58	59.12	1.72	0	5177767	40374	5211	5211	16031	348	307	299	2880	2673	33.7	4.47	-100	-1	-1	65	38	1	0	0	0
SM1031_bin.26	f__Xanthomonadaceae (UID4214)	55	659	290	96.59	7.03	6.98	3250640	25423	2968	2968	105085	408	338	330	1990	1907	34.7	5.09	-100	-1	-1	52	568	37	2	0	0
SM1031_bin.27	k__Bacteria (UID203)	5449	104	58	55.52	1.72	0	4573190	44489	4270	4270	19605	399	330	320	2930	2871	33.4	4.75	-100	-1	-1	65	38	1	0	0	0
SM1031_bin.29	k__Bacteria (UID2495)	2993	147	91	81.81	2.75	33.33	5772384	55791	4765	4765	34164	432	362	350	4075	3923	37.5	5.65	-100	-1	-1	52	92	3	0	0	0
SM1031_bin.3	c__Betaproteobacteria (UID3959)	235	419	211	73.46	5.33	26.67	2808929	23295	2954	2954	9943	365	301	293	1907	1860	34.2	4.94	-100	-1	-1	133	271	15	0	0	0
SM1031_bin.30	k__Bacteria (UID2982)	88	230	148	80.18	5.07	25	4118992	45760	3845	3845	7811	409	328	316	3440	3232	35.9	5.8	-100	-1	-1	51	171	8	0	0	0
SM1031_bin.31	k__Bacteria (UID2495)	2993	147	91	93.41	8.29	11.11	3679017	31226	3239	3239	92536	425	358	348	3686	3442	33.5	5.87	-100	-1	-1	7	123	12	5	0	0
SM1031_bin.32	k__Bacteria (UID2982)	88	230	148	53.26	4.39	0	3593952	38694	3675	3675	4497	377	298	287	2562	2467	35.6	4.78	-100	-1	-1	109	115	5	1	0	0
SM1031_bin.35	k__Bacteria (UID203)	5449	104	58	55.17	5.17	0	1692597	14374	1670	1670	13976	393	324	316	1959	1905	34.6	4.67	-100	-1	-1	67	33	4	0	0	0
SM1031_bin.36	k__Bacteria (UID3187)	2258	181	110	95.91	2.73	0	3156259	23649	3317	3317	50051	355	271	264	2910	2838	36.6	5.83	-100	-1	-1	6	172	3	0	0	0
SM1031_bin.37	f__Flavobacteriaceae (UID2817)	81	511	283	63.25	2.72	33.33	3218415	63266	2946	2947	4914	422	332	310	5048	4671	36.8	5.9	-100	-1	-1	203	286	21	1	0	0
SM1031_bin.38	c__Betaproteobacteria (UID3959)	235	419	211	60.7	3.44	45.45	2161035	19681	2484	2484	5536	318	269	261	1407	1371	34.6	4.88	-100	-1	-1	165	245	8	1	0	0
SM1031_bin.4	c__Gammaproteobacteria (UID4444)	263	507	232	98.71	1.01	0	4669297	53080	4033	4033	227826	427	348	335	6990	6491	36	5.76	-100	-1	-1	3	498	5	1	0	0
SM1031_bin.5	k__Bacteria (UID2570)	433	274	183	56.05	9.54	0	2382524	41216	2464	2464	4004	366	293	276	1871	1700	39.4	5.73	-100	-1	-1	117	133	20	4	0	0
SM1031_bin.6	k__Bacteria (UID203)	5449	104	58	57.24	2.59	0	4178921	41274	4010	4010	12876	392	321	310	1970	1911	33.4	4.45	-100	-1	-1	66	36	2	0	0	0
SM1031_bin.8	k__Bacteria (UID2565)	2921	141	86	92.92	0	0	9094462	85260	7499	7499	21744	453	353	341	5157	4805	35.8	5.37	-100	-1	-1	7	134	0	0	0	0
SM1031_bin.9	k__Bacteria (UID2565)	2921	143	88	77.08	2.27	0	4678400	26144	4720	4720	6240	405	307	302	2147	2019	33.9	4.63	-100	-1	-1	24	116	3	0	0	0
SM1050_bin.1	k__Bacteria (UID203)	5449	104	58	50.47	2.61	0	1357960	9846	1623	1623	4559	317	249	243	1207	1178	34.3	4.85	-100	-1	-1	64	35	5	0	0	0
SM1050_bin.10	k__Bacteria (UID1453)	901	171	117	94.87	2.37	40	4693994	20428	4641	4641	36621	379	316	311	2144	2093	34	4.54	-100	-1	-1	7	159	5	0	0	0
SM1050_bin.11	k__Bacteria (UID2495)	2993	147	91	59.39	8.34	88.89	2503603	16188	2655	2655	6775	378	292	286	3052	2909	35.6	5.52	-100	-1	-1	81	57	9	0	0	0
SM1050_bin.12	k__Bacteria (UID2495)	2993	147	91	94.35	0.2	0	2320004	19526	2166	2166	16269	392	316	307	12817	12187	36.1	4.62	-100	-1	-1	16	129	2	0	0	0
SM1050_bin.13	k__Bacteria (UID1452)	924	151	101	74.75	0.99	0	1030953	10380	1023	1023	824292	380	309	298	2952	2769	33.8	3	-100	-1	-1	29	121	1	0	0	0
SM1050_bin.14	k__Bacteria (UID2495)	2993	147	91	92.31	4.4	0	4681811	32132	4174	4174	32622	423	344	337	2922	2870	36.2	5.24	-100	-1	-1	23	120	4	0	0	0
SM1050_bin.15	k__Bacteria (UID1452)	924	161	108	59.26	1.49	33.33	978007	14174	1044	1044	6938	357	289	275	1577	1475	35.4	3.87	-100	-1	-1	49	109	3	0	0	0
SM1050_bin.18	k__Bacteria (UID203)	5449	104	58	53.61	0	0	2530972	18370	2763	2763	8250	344	289	282	2600	2556	33.1	6.01	-100	-1	-1	63	41	0	0	0	0
SM1050_bin.2	k__Bacteria (UID2565)	2921	143	88	85.23	1.7	0	3215293	17661	3066	3066	10742	413	331	325	2159	2139	37.6	5.58	-100	-1	-1	17	124	2	0	0	0
SM1050_bin.20	k__Bacteria (UID203)	5449	104	58	64.58	2.59	100	5786864	57247	5784	5784	6635	349	300	290	3596	3327	34	5.73	-100	-1	-1	56	46	2	0	0	0
SM1050_bin.21	k__Bacteria (UID1453)	901	171	117	60.68	1.28	100	2040212	18468	2013	2013	8445	394	311	302	1903	1788	36.7	6.15	-100	-1	-1	65	104	2	0	0	0
SM1050_bin.22	o__Rhizobiales (UID3450)	238	513	244	50.3	0.83	33.33	2128914	14984	2289	2289	7277	334	278	272	2509	2462	35.6	7.23	-100	-1	-1	250	257	6	0	0	0
SM1050_bin.23	k__Bacteria (UID2565)	2921	143	87	71.1	7.77	11.11	7096709	64429	6268	6268	6729	438	329	319	2921	2843	36.6	5.74	-100	-1	-1	50	84	9	0	0	0
SM1050_bin.24	o__Rhizobiales (UID3450)	238	513	244	91.85	3.21	38.46	5400003	43020	5501	5502	18653	345	283	275	2856	2771	34.8	5.31	-100	-1	-1	49	453	10	1	0	0
SM1050_bin.25	k__Bacteria (UID2570)	433	273	183	78.76	1.09	0	1849686	38552	1925	1925	6486	360	299	279	2200	1993	39.4	6.25	-100	-1	-1	63	208	2	0	0	0
SM1050_bin.26	c__Alphaproteobacteria (UID3422)	26	529	308	55.06	1.52	50	1822056	14221	2298	2298	4533	314	244	238	1550	1479	32.4	3.87	-100	-1	-1	254	269	6	0	0	0
SM1050_bin.27	c__Gammaproteobacteria (UID4266)	1097	270	172	83.91	1.16	0	1957750	33775	1947	1947	11682	370	306	289	3692	3429	35	4.27	-100	-1	-1	76	192	2	0	0	0
SM1050_bin.28	c__Gammaproteobacteria (UID4266)	1097	270	172	94.15	1.36	0	2057850	26080	1840	1840	122202	411	343	329	4664	4241	33.5	6.77	-100	-1	-1	12	255	3	0	0	0
SM1050_bin.29	k__Bacteria (UID2495)	2993	147	91	83.52	4.4	20	3115995	27536	2957	2957	19620	413	334	325	2521	2360	33.6	6.07	-100	-1	-1	16	126	5	0	0	0
SM1050_bin.3	p__Actinobacteria (UID1454)	732	199	116	75.78	6.47	50	1973204	12796	2060	2060	26493	364	296	290	1636	1552	36.7	4.21	-100	-1	-1	64	117	18	0	0	0
SM1050_bin.31	k__Bacteria (UID203)	5449	104	58	55.17	1.72	0	2618994	13950	2894	2894	8464	350	289	284	1406	1387	34.7	4.13	-100	-1	-1	67	36	1	0	0	0
SM1050_bin.32	k__Bacteria (UID2982)	88	230	148	88.21	1.49	0	5252533	53448	4737	4737	13389	416	333	322	2737	2577	36	5.11	-100	-1	-1	58	169	3	0	0	0
SM1050_bin.33	k__Bacteria (UID1452)	924	161	108	75.58	1.11	0	6881495	44607	6650	6650	7590	389	301	294	2775	2728	36.6	4.73	-100	-1	-1	44	115	2	0	0	0
SM1050_bin.34	k__Bacteria (UID1452)	924	151	101	76.4	2.97	0	1165097	11705	1167	1167	904679	379	308	298	1939	1864	34.2	5.17	-100	-1	-1	26	122	3	0	0	0
SM1050_bin.36	k__Bacteria (UID2982)	88	230	148	57.2	4.08	14.29	3935288	43142	3524	3524	4339	427	337	325	3543	3455	35.9	4.02	-100	-1	-1	96	127	7	0	0	0
SM1050_bin.37	k__Bacteria (UID3187)	2258	188	117	78.75	1.76	33.33	3735330	27974	3562	3562	8545	407	332	325	2280	2257	34.8	4.56	-100	-1	-1	60	125	3	0	0	0
SM1050_bin.38	o__Rhizobiales (UID3642)	107	485	316	90.93	0.24	0	2429593	23998	2369	2369	25772	374	293	283	2931	2857	33.8	5.78	-100	-1	-1	57	426	2	0	0	0
SM1050_bin.39	k__Bacteria (UID2982)	88	230	148	66.32	3.41	0	2163847	25427	1958	1958	7908	420	344	331	5341	5096	39.3	6.43	-100	-1	-1	80	144	5	1	0	0
SM1050_bin.40	k__Bacteria (UID203)	5449	104	58	56.9	5.17	33.33	1487392	21681	1620	1620	4225	347	271	258	2280	2142	35.9	4.88	-100	-1	-1	60	41	3	0	0	0
SM1050_bin.41	p__Actinobacteria (UID1454)	732	199	116	99.57	0	0	2359510	19253	2233	2233	105328	386	327	318	2308	2176	37.9	4.27	-100	-1	-1	1	198	0	0	0	0
SM1050_bin.42	k__Bacteria (UID2565)	2921	152	93	100	0.18	0	6565332	67164	5352	5352	262967	453	371	359	3562	3464	36.3	5.69	-100	-1	-1	0	151	1	0	0	0
SM1050_bin.44	k__Bacteria (UID203)	5449	104	58	60.34	2.3	50	2379093	16043	2638	2638	6523	346	280	274	1474	1451	35.9	5.53	-100	-1	-1	58	44	2	0	0	0
SM1050_bin.45	c__Betaproteobacteria (UID3959)	235	419	211	97.24	1.73	16.67	5469058	52820	5295	5295	70270	339	314	304	2969	2885	34.8	5.99	-100	-1	-1	24	389	6	0	0	0
SM1050_bin.46	k__Bacteria (UID1452)	924	151	101	65.04	1.89	0	803583	8633	933	933	11268	341	270	261	5954	5512	35.1	1.94	-100	-1	-1	42	102	7	0	0	0
SM1050_bin.47	k__Bacteria (UID1452)	924	151	101	71.45	2.38	0	730898	8834	763	763	22322	362	279	267	2412	2277	36	4.31	-100	-1	-1	34	113	4	0	0	0
SM1050_bin.48	k__Bacteria (UID2982)	88	230	148	61.93	0.68	0	1034919	11549	1185	1185	6309	335	274	264	1347	1291	39.8	9.04	-100	-1	-1	76	153	1	0	0	0
SM1050_bin.49	k__Bacteria (UID1453)	901	171	117	52.74	1.14	0	4278091	23644	4710	4710	8635	349	278	273	4900	4786	34	5.28	-100	-1	-1	88	81	2	0	0	0
SM1050_bin.5	k__Bacteria (UID203)	5449	104	58	53.09	1.72	0	2790641	24639	2804	2804	15685	380	314	306	1872	1829	33.6	4.81	-100	-1	-1	68	35	1	0	0	0
SM1050_bin.50	o__Actinomycetales (UID1808)	268	396	220	50.2	1.52	80	2507351	18627	2945	2945	4044	327	266	260	1700	1670	34.2	3.82	-100	-1	-1	215	176	5	0	0	0
SM1050_bin.51	k__Bacteria (UID2495)	2993	147	91	94.81	3.85	0	4395938	36551	3883	3883	135014	421	354	344	3061	2926	33.7	6	-100	-1	-1	13	130	4	0	0	0
SM1050_bin.52	k__Bacteria (UID3187)	2258	181	110	89.49	2.78	0	2418181	18356	2471	2471	34955	373	296	288	2907	2832	36.1	5.7	-100	-1	-1	18	159	4	0	0	0
SM1050_bin.53	c__Alphaproteobacteria (UID3305)	564	349	230	52.22	2.73	63.64	1591162	11844	1917	1917	4739	328	260	254	1464	1438	34.3	5.95	-100	-1	-1	176	162	11	0	0	0
SM1050_bin.55	c__Gammaproteobacteria (UID4266)	1097	269	171	100	0.39	0	2487580	33389	2306	2306	75634	394	318	303	3247	3061	35.7	6.95	-100	-1	-1	0	268	0	1	0	0
SM1050_bin.56	c__Alphaproteobacteria (UID3305)	564	349	230	81.13	1.3	0	1568182	17314	1502	1502	118989	388	317	305	2156	2035	37.2	6.26	-100	-1	-1	53	293	2	1	0	0
SM1050_bin.57	c__Alphaproteobacteria (UID3305)	564	349	230	65.81	1.52	75	3560842	24680	3800	3800	7943	343	274	267	2341	2135	35.6	5.35	-100	-1	-1	126	219	4	0	0	0
SM1050_bin.58	c__Gammaproteobacteria (UID4266)	1097	270	172	77.99	2.02	9.09	1690579	27715	1802	1802	6919	361	294	279	2431	2261	33.2	5.8	-100	-1	-1	65	194	11	0	0	0
SM1050_bin.60	k__Bacteria (UID2565)	2921	141	86	54.44	2.03	0	5301953	37818	5006	5006	6093	414	320	312	1885	1841	35.8	6.07	-100	-1	-1	69	68	4	0	0	0
SM1050_bin.61	o__Burkholderiales (UID4002)	107	574	251	72.06	4.34	20	3535382	35294	3716	3716	4999	366	293	283	1642	1524	33.4	5.05	-100	-1	-1	161	378	28	5	2	0
SM1050_bin.62	k__Bacteria (UID2565)	2921	143	88	61.75	6.82	28.57	4210866	31169	4105	4105	5368	390	299	292	2332	2309	35.8	6.31	-100	-1	-1	55	81	7	0	0	0
SM1050_bin.8	k__Bacteria (UID3187)	2258	188	117	57.87	0.36	50	3146585	20810	3197	3197	4971	403	308	302	1948	1856	32.5	4.98	-100	-1	-1	77	109	2	0	0	0
SM1050_bin.9	c__Gammaproteobacteria (UID4388)	66	444	262	98.47	4.01	0	2565291	37793	2275	2275	45472	406	334	318	4649	4421	36.2	7.87	-100	-1	-1	4	419	21	0	0	0
