# Supplementary material for: Comparisons of fractionation methods for DNA and RNA viruses unearths a multifaceted relationship between viruses and soil moisture
Source: Research Square preprint supplement (doi:10.21203/rs.3.rs-7274549/v1), 2025-08-14
Supplement: Supplementary file 2 [file 362fb8b7dae6f7188c4b2573.xlsx]

## Sheet: index
Sheet	Description
vOTUs_ParentDatabase_27054	All quality vOTUs from all methods combined into one data sheet (n = 27370). This does not include virome co-assemblies. This is the dataset used for method comparisons.
DNA_Virome	All vOTUs from DNA Virome including low quality that were removed for above. (n = 14301)
RNA_Virome	All vOTUs from RNA Virome including low quality that were removed for above. (n = 5652)
Bacterial_DNA	All vOTUs from DNA Bacterial including low quality that were removed for above. (n = 909)
EukFloat_DNA	All vOTUs from DNA EukFloat including low quality that were removed for above. (n = 3803)
Bulk_MetaT	All vOTUs from RNA Bulk including low quality that were removed for above. (n = 9101)
PolyA_MetaT	All vOTUs from RNA PolyA including low quality that were removed for above. (n = 968)
23117_clustered_across_vOTUs	Clustering dataframe of vOTUs from each method after being clustered across all methods to detect the vOTU overlap across methods
vOTUs_NonRedundant_wCoass_28500	All vOTUs from all methods combined into one data sheet (n = 37982). This includes virome co-assemblies. Columns can be filtered to subset for final database of 28,500 quality, cross-clustered RNA / DNA vOTUs (filter: final_call = keep, clustered_representative = yes)
RdRP_phylogenetic_trees	Taxonomic assignments via phylogenetic trees for the 8,652 RdRps encoded in 8,618 RNA vOTUs from all data methods.
ICTV_virus_masterlist	Masterlist downloaded from ICTV on October 20, 2024. Specifically, file version: ICTV_Master_Species_List_2023_MSL39.v3.xlsx (https://ictv.global/msl)
iPHoP_results	Results for virus-host matching results
RNAVirHost_results	Results from virus host matching of RNA viruses
diversity_stats	Statistics reported in Figure S6

## Sheet: vOTUs_ParentDatabase_27054
Representative_Sequence	Sequences	sample_origin	kept_for_clustering_analyses	virus_length	provirus	gene_count	viral_genes	host_genes	checkv_quality	miuvig_quality	completeness	completeness_method	kmer_freq	coordinates	genetic_code	virus_score	n_hallmarks	marker_enrichment	MVP_taxonomy	Genome type	Host type	Realm	Kingdom	Phylum	Class	Order	Family
SM1000_MG_bacterial_k127_10122351	SM1000_SM1000_MG_bacterial_k127_10122351	MG_bacterial	yes	70641	No	83	23	0	Complete	High-quality	100	DTR (high-confidence)	1		11	0.9723	9	69.3693	Viruses;Duplodnaviria;Heunggongvirae;Uroviricota;Caudoviricetes	dsDNA	Prokaryote	Duplodnaviria	Heunggongvirae	Uroviricota	Caudoviricetes
SM1000_MG_bacterial_k127_10300897	SM1000_SM1000_MG_bacterial_k127_10300897	MG_bacterial	yes	30355	No	24	3	0	Low-quality	Genome-fragment	36.25	AAI-based (medium-confidence)	1		11	0.9397	2	1.5176	Viruses;Duplodnaviria;Heunggongvirae;Uroviricota;Caudoviricetes	dsDNA	Prokaryote	Duplodnaviria	Heunggongvirae	Uroviricota	Caudoviricetes
SM1000_MG_bacterial_k127_1032273	SM1000_SM1000_MG_bacterial_k127_1032273	MG_bacterial	yes	15040	No	26	1	0	Low-quality	Genome-fragment	7.6	HMM-based (lower-bound)	1		11	0.9477	0	5.688	Viruses;Duplodnaviria;Heunggongvirae;Uroviricota;Caudoviricetes	dsDNA	Prokaryote	Duplodnaviria	Heunggongvirae	Uroviricota	Caudoviricetes
SM1000_MG_bacterial_k127_1032318	SM1000_SM1000_MG_bacterial_k127_1032318	MG_bacterial	yes	10447	No	22	4	0	Low-quality	Genome-fragment	8.53	HMM-based (lower-bound)	1.01		11	0.8898	0	5.1619	Viruses;Duplodnaviria;Heunggongvirae;Uroviricota;Caudoviricetes	dsDNA	Prokaryote	Duplodnaviria	Heunggongvirae	Uroviricota	Caudoviricetes
SM1000_MG_bacterial_k127_10394388	SM1000_SM1000_MG_bacterial_k127_10394388	MG_bacterial	yes	10051	No	16	2	0	Low-quality	Genome-fragment	15.18	HMM-based (lower-bound)	1		11	0.8623	1	6.474	Viruses;Duplodnaviria;Heunggongvirae;Uroviricota;Caudoviricetes	dsDNA	Prokaryote	Duplodnaviria	Heunggongvirae	Uroviricota	Caudoviricetes
SM1000_MG_bacterial_k127_10677068	SM1000_SM1000_MG_bacterial_k127_10677068	MG_bacterial	yes	47274	No	64	29	1	Complete	High-quality	100	DTR (high-confidence)	1		11	0.9746	15	48.7474	Viruses;Duplodnaviria;Heunggongvirae;Uroviricota;Caudoviricetes	dsDNA	Prokaryote	Duplodnaviria	Heunggongvirae	Uroviricota	Caudoviricetes
SM1000_MG_bacterial_k127_110426	SM1000_SM1000_MG_bacterial_k127_110426	MG_bacterial	yes	11036	No	8	5	0	Low-quality	Genome-fragment	14.95	AAI-based (medium-confidence)	1		11	0.9721	2	11.6122	Viruses;Duplodnaviria;Heunggongvirae;Uroviricota;Caudoviricetes;Schitoviridae	dsDNA	Prokaryote	Duplodnaviria	Heunggongvirae	Uroviricota	Caudoviricetes		Schitoviridae
SM1000_MG_bacterial_k127_11051181	SM1000_SM1000_MG_bacterial_k127_11051181	MG_bacterial	yes	34495	No	56	3	0	Medium-quality	Genome-fragment	82.41	AAI-based (medium-confidence)	1		11	0.965	3	17.8075	Viruses;Duplodnaviria;Heunggongvirae;Uroviricota;Caudoviricetes	dsDNA	Prokaryote	Duplodnaviria	Heunggongvirae	Uroviricota	Caudoviricetes
SM1000_MG_bacterial_k127_11063044	SM1000_SM1000_MG_bacterial_k127_11063044	MG_bacterial	yes	18853	No	21	6	0	Low-quality	Genome-fragment	39.45	AAI-based (medium-confidence)	1		11	0.9674	10	15.6357	Viruses;Duplodnaviria;Heunggongvirae;Uroviricota;Caudoviricetes	dsDNA	Prokaryote	Duplodnaviria	Heunggongvirae	Uroviricota	Caudoviricetes
SM1000_MG_bacterial_k127_11155011	SM1000_SM1000_MG_bacterial_k127_11155011	MG_bacterial	yes	38268	No	49	14	0	Medium-quality	Genome-fragment	76.24	HMM-based (lower-bound)	1		11	0.9732	7	43.3044	Viruses;Duplodnaviria;Heunggongvirae;Uroviricota;Caudoviricetes	dsDNA	Prokaryote	Duplodnaviria	Heunggongvirae	Uroviricota	Caudoviricetes
SM1000_MG_bacterial_k127_11198503	SM1000_SM1000_MG_bacterial_k127_11198503	MG_bacterial	yes	13322	No	13	3	1	Low-quality	Genome-fragment	17.76	HMM-based (lower-bound)	1		11	0.9539	2	5.8204	Viruses;Duplodnaviria;Heunggongvirae;Uroviricota;Caudoviricetes	dsDNA	Prokaryote	Duplodnaviria	Heunggongvirae	Uroviricota	Caudoviricetes
SM1000_MG_bacterial_k127_11461274	SM1000_SM1000_MG_bacterial_k127_11461274	MG_bacterial	yes	15793	No	17	2	0	Low-quality	Genome-fragment	19.35	HMM-based (lower-bound)	1		11	0.9806	1	7.8908	Viruses;Duplodnaviria;Heunggongvirae;Uroviricota;Caudoviricetes	dsDNA	Prokaryote	Duplodnaviria	Heunggongvirae	Uroviricota	Caudoviricetes
SM1000_MG_bacterial_k127_11830943	SM1000_SM1000_MG_bacterial_k127_11830943	MG_bacterial	yes	10466	No	13	1	0	Low-quality	Genome-fragment	21.32	AAI-based (medium-confidence)	1		11	0.9348	3	14.5878	Viruses;Duplodnaviria;Heunggongvirae;Uroviricota;Caudoviricetes	dsDNA	Prokaryote	Duplodnaviria	Heunggongvirae	Uroviricota	Caudoviricetes
SM1000_MG_bacterial_k127_11858827	SM1000_SM1000_MG_bacterial_k127_11858827	MG_bacterial	yes	14671	No	23	3	3	Low-quality	Genome-fragment	23.41	AAI-based (medium-confidence)	1.01		11	0.8492	0	3.7696	Viruses;Duplodnaviria;Heunggongvirae;Uroviricota;Caudoviricetes	dsDNA	Prokaryote	Duplodnaviria	Heunggongvirae	Uroviricota	Caudoviricetes
SM1000_MG_bacterial_k127_11867572	SM1000_SM1000_MG_bacterial_k127_11867572	MG_bacterial	yes	12084	No	18	6	0	Low-quality	Genome-fragment	31.29	AAI-based (medium-confidence)	1		11	0.9607	5	12.3639	Viruses;Duplodnaviria;Heunggongvirae;Uroviricota;Caudoviricetes	dsDNA	Prokaryote	Duplodnaviria	Heunggongvirae	Uroviricota	Caudoviricetes
SM1000_MG_bacterial_k127_11930537	SM1000_SM1000_MG_bacterial_k127_11930537	MG_bacterial	yes	13260	No	15	2	0	Low-quality	Genome-fragment	22.16	HMM-based (lower-bound)	1		11	0.7738	1	1.7183	Viruses;Varidnaviria;Bamfordvirae;Nucleocytoviricota;Megaviricetes;Imitervirales;Mimiviridae	dsDNA	Eukaryote	Varidnaviria	Bamfordvirae	Nucleocytoviricota	Megaviricetes	Imitervirales	Mimiviridae
SM1000_MG_bacterial_k127_11948202	SM1000_SM1000_MG_bacterial_k127_11948202	MG_bacterial	yes	10998	No	25	3	2	Low-quality	Genome-fragment	5.45	HMM-based (lower-bound)	1		11	0.9557	0	5.5982	Viruses;Duplodnaviria;Heunggongvirae;Uroviricota;Caudoviricetes	dsDNA	Prokaryote	Duplodnaviria	Heunggongvirae	Uroviricota	Caudoviricetes
SM1000_MG_bacterial_k127_11997182	SM1000_SM1000_MG_bacterial_k127_11997182	MG_bacterial	yes	11329	No	19	3	0	Low-quality	Genome-fragment	13.68	HMM-based (lower-bound)	1		11	0.9751	2	8.5442	Viruses;Duplodnaviria;Heunggongvirae;Uroviricota;Caudoviricetes	dsDNA	Prokaryote	Duplodnaviria	Heunggongvirae	Uroviricota	Caudoviricetes
SM1000_MG_bacterial_k127_12168326	SM1000_SM1000_MG_bacterial_k127_12168326	MG_bacterial	yes	14637	No	21	1	1	Low-quality	Genome-fragment	14.4	HMM-based (lower-bound)	1		11	0.8949	1	6.9565	Viruses;Duplodnaviria;Heunggongvirae;Uroviricota;Caudoviricetes	dsDNA	Prokaryote	Duplodnaviria	Heunggongvirae	Uroviricota	Caudoviricetes
SM1000_MG_bacterial_k127_12230517_1_179_13550	SM1000_SM1000_MG_bacterial_k127_12230517_1_179_13550,SM1002_SM1002_MG_bacterial_k127_7910442	MG_bacterial	yes	13372	Yes	7	2	0	Low-quality	Genome-fragment	22.59	HMM-based (lower-bound)	1	179-13550	11	0.9092	0	8.478	Viruses;Duplodnaviria;Heunggongvirae;Uroviricota;Caudoviricetes	dsDNA	Prokaryote	Duplodnaviria	Heunggongvirae	Uroviricota	Caudoviricetes
SM1000_MG_bacterial_k127_12396531	SM1000_SM1000_MG_bacterial_k127_12396531	MG_bacterial	yes	15190	No	20	8	1	Low-quality	Genome-fragment	25.42	AAI-based (medium-confidence)	1		11	0.949	6	19.2526	Viruses;Duplodnaviria;Heunggongvirae;Uroviricota;Caudoviricetes	dsDNA	Prokaryote	Duplodnaviria	Heunggongvirae	Uroviricota	Caudoviricetes
SM1000_MG_bacterial_k127_12446028	SM1000_SM1000_MG_bacterial_k127_12446028	MG_bacterial	yes	20665	No	27	7	1	Low-quality	Genome-fragment	32.77	HMM-based (lower-bound)	1		11	0.9503	7	17.4615	Viruses;Duplodnaviria;Heunggongvirae;Uroviricota;Caudoviricetes	dsDNA	Prokaryote	Duplodnaviria	Heunggongvirae	Uroviricota	Caudoviricetes
SM1000_MG_bacterial_k127_12466375	SM1000_SM1000_MG_bacterial_k127_12466375	MG_bacterial	yes	19373	No	38	6	0	Low-quality	Genome-fragment	30.37	AAI-based (medium-confidence)	1		11	0.9242	0	15.8259	Viruses;Duplodnaviria;Heunggongvirae;Uroviricota;Caudoviricetes	dsDNA	Prokaryote	Duplodnaviria	Heunggongvirae	Uroviricota	Caudoviricetes
SM1000_MG_bacterial_k127_12616149	SM1000_SM1000_MG_bacterial_k127_12616149	MG_bacterial	yes	43854	No	71	13	1	Medium-quality	Genome-fragment	77.33	AAI-based (medium-confidence)	1		11	0.917	6	40.3573	Viruses;Duplodnaviria;Heunggongvirae;Uroviricota;Caudoviricetes	dsDNA	Prokaryote	Duplodnaviria	Heunggongvirae	Uroviricota	Caudoviricetes
SM1000_MG_bacterial_k127_12636572	SM1000_SM1000_MG_bacterial_k127_12636572	MG_bacterial	yes	29576	No	29	9	0	Medium-quality	Genome-fragment	72.99	AAI-based (medium-confidence)	1.01		11	0.975	3	24.3746	Viruses;Duplodnaviria;Heunggongvirae;Uroviricota;Caudoviricetes	dsDNA	Prokaryote	Duplodnaviria	Heunggongvirae	Uroviricota	Caudoviricetes
SM1000_MG_bacterial_k127_12659882	SM1000_SM1000_MG_bacterial_k127_12659882	MG_bacterial	yes	21658	No	51	6	0	Low-quality	Genome-fragment	20.84	HMM-based (lower-bound)	1		11	0.9373	2	20.11	Viruses;Duplodnaviria;Heunggongvirae;Uroviricota;Caudoviricetes	dsDNA	Prokaryote	Duplodnaviria	Heunggongvirae	Uroviricota	Caudoviricetes
SM1000_MG_bacterial_k127_12834838	SM1000_SM1000_MG_bacterial_k127_12834838	MG_bacterial	yes	11033	No	18	4	0	Low-quality	Genome-fragment	24.06	AAI-based (medium-confidence)	1.01		11	0.9738	0	9.3039	Viruses;Duplodnaviria;Heunggongvirae;Uroviricota;Caudoviricetes	dsDNA	Prokaryote	Duplodnaviria	Heunggongvirae	Uroviricota	Caudoviricetes
SM1000_MG_bacterial_k127_12876146	SM1000_SM1000_MG_bacterial_k127_12876146	MG_bacterial	yes	13966	No	20	5	2	Low-quality	Genome-fragment	39.21	AAI-based (medium-confidence)	1		11	0.9791	1	24.0751	Viruses;Duplodnaviria;Heunggongvirae;Uroviricota;Caudoviricetes	dsDNA	Prokaryote	Duplodnaviria	Heunggongvirae	Uroviricota	Caudoviricetes
SM1000_MG_bacterial_k127_13031023	SM1000_SM1000_MG_bacterial_k127_13031023	MG_bacterial	yes	16581	No	32	7	0	Low-quality	Genome-fragment	9.2	AAI-based (medium-confidence)	1		11	0.9651	2	16.5087	Viruses;Duplodnaviria;Heunggongvirae;Uroviricota;Caudoviricetes	dsDNA	Prokaryote	Duplodnaviria	Heunggongvirae	Uroviricota	Caudoviricetes
SM1000_MG_bacterial_k127_13117407	SM1000_SM1000_MG_bacterial_k127_13117407	MG_bacterial	yes	12440	No	18	9	0	Low-quality	Genome-fragment	20.22	HMM-based (lower-bound)	1		11	0.9803	7	20.6432	Viruses;Duplodnaviria;Heunggongvirae;Uroviricota;Caudoviricetes	dsDNA	Prokaryote	Duplodnaviria	Heunggongvirae	Uroviricota	Caudoviricetes
SM1000_MG_bacterial_k127_1321237	SM1000_SM1000_MG_bacterial_k127_1321237	MG_bacterial	yes	13405	No	31	4	0	Low-quality	Genome-fragment	18.5	HMM-based (lower-bound)	1		11	0.9519	1	9.2213	Viruses;Duplodnaviria;Heunggongvirae;Uroviricota;Caudoviricetes	dsDNA	Prokaryote	Duplodnaviria	Heunggongvirae	Uroviricota	Caudoviricetes
SM1000_MG_bacterial_k127_13276727	SM1000_SM1000_MG_bacterial_k127_13276727	MG_bacterial	yes	15941	No	49	1	0	Low-quality	Genome-fragment	5.42	HMM-based (lower-bound)	1		11	0.8704	0	1.3315	Viruses;Duplodnaviria;Heunggongvirae;Uroviricota;Caudoviricetes	dsDNA	Prokaryote	Duplodnaviria	Heunggongvirae	Uroviricota	Caudoviricetes
SM1000_MG_bacterial_k127_13475645	SM1000_SM1000_MG_bacterial_k127_13475645	MG_bacterial	yes	42122	No	78	6	0	Medium-quality	Genome-fragment	62.47	HMM-based (lower-bound)	1		11	0.9744	6	28.8897	Viruses;Duplodnaviria;Heunggongvirae;Uroviricota;Caudoviricetes	dsDNA	Prokaryote	Duplodnaviria	Heunggongvirae	Uroviricota	Caudoviricetes
SM1000_MG_bacterial_k127_13578303	SM1000_SM1000_MG_bacterial_k127_13578303	MG_bacterial	yes	16534	No	23	1	0	Low-quality	Genome-fragment	35.34	AAI-based (medium-confidence)	1		11	0.9741	1	9.5571	Viruses;Duplodnaviria;Heunggongvirae;Uroviricota;Caudoviricetes	dsDNA	Prokaryote	Duplodnaviria	Heunggongvirae	Uroviricota	Caudoviricetes
SM1000_MG_bacterial_k127_13638697	SM1000_SM1000_MG_bacterial_k127_13638697	MG_bacterial	yes	161529	No	206	24	1	Complete	High-quality	100	DTR (medium-confidence)	1		11	0.9753	3	117.725	Viruses;Duplodnaviria;Heunggongvirae;Uroviricota;Caudoviricetes	dsDNA	Prokaryote	Duplodnaviria	Heunggongvirae	Uroviricota	Caudoviricetes
SM1000_MG_bacterial_k127_13638703	SM1000_SM1000_MG_bacterial_k127_13638703	MG_bacterial	yes	35155	No	58	17	0	Medium-quality	Genome-fragment	61.52	HMM-based (lower-bound)	1		11	0.9792	9	33.7836	Viruses;Duplodnaviria;Heunggongvirae;Uroviricota;Caudoviricetes	dsDNA	Prokaryote	Duplodnaviria	Heunggongvirae	Uroviricota	Caudoviricetes
SM1000_MG_bacterial_k127_13638707	SM1000_SM1000_MG_bacterial_k127_13638707	MG_bacterial	yes	67038	No	102	18	1	Complete	High-quality	100	DTR (high-confidence)	1		11	0.9802	9	61.2482	Viruses;Duplodnaviria;Heunggongvirae;Uroviricota;Caudoviricetes	dsDNA	Prokaryote	Duplodnaviria	Heunggongvirae	Uroviricota	Caudoviricetes
SM1000_MG_bacterial_k127_13638712	SM1000_SM1000_MG_bacterial_k127_13638712	MG_bacterial	yes	31369	No	51	16	0	Complete	High-quality	100	DTR (high-confidence)	1		11	0.9797	8	33.7379	Viruses;Duplodnaviria;Heunggongvirae;Uroviricota;Caudoviricetes	dsDNA	Prokaryote	Duplodnaviria	Heunggongvirae	Uroviricota	Caudoviricetes
SM1000_MG_bacterial_k127_13638718	SM1000_SM1000_MG_bacterial_k127_13638718	MG_bacterial	yes	70165	No	104	6	2	Complete	High-quality	100	DTR (high-confidence)	1		11	0.9626	3	24.602	Viruses;Duplodnaviria;Heunggongvirae;Uroviricota;Caudoviricetes	dsDNA	Prokaryote	Duplodnaviria	Heunggongvirae	Uroviricota	Caudoviricetes
SM1000_MG_bacterial_k127_13638722	SM1000_SM1000_MG_bacterial_k127_13638722	MG_bacterial	yes	63136	No	93	25	6	Complete	High-quality	100	DTR (high-confidence)	1		11	0.9639	13	63.3541	Viruses;Duplodnaviria;Heunggongvirae;Uroviricota;Caudoviricetes	dsDNA	Prokaryote	Duplodnaviria	Heunggongvirae	Uroviricota	Caudoviricetes
SM1000_MG_bacterial_k127_13638736	SM1000_SM1000_MG_bacterial_k127_13638736	MG_bacterial	yes	67247	No	100	8	0	Complete	High-quality	100	DTR (high-confidence)	1		11	0.9593	2	29.792	Viruses;Duplodnaviria;Heunggongvirae;Uroviricota;Caudoviricetes	dsDNA	Prokaryote	Duplodnaviria	Heunggongvirae	Uroviricota	Caudoviricetes
SM1000_MG_bacterial_k127_13638737	SM1000_SM1000_MG_bacterial_k127_13638737	MG_bacterial	yes	45165	No	73	7	1	Medium-quality	Genome-fragment	52.93	HMM-based (lower-bound)	1		11	0.9545	4	22.9939	Viruses;Duplodnaviria;Heunggongvirae;Uroviricota;Caudoviricetes	dsDNA	Prokaryote	Duplodnaviria	Heunggongvirae	Uroviricota	Caudoviricetes
SM1000_MG_bacterial_k127_13638747	SM1000_SM1000_MG_bacterial_k127_13638747	MG_bacterial	yes	49316	No	92	41	0	Complete	High-quality	100	DTR (high-confidence)	1		11	0.9817	15	79.8539	Viruses;Duplodnaviria;Heunggongvirae;Uroviricota;Caudoviricetes	dsDNA	Prokaryote	Duplodnaviria	Heunggongvirae	Uroviricota	Caudoviricetes
SM1000_MG_bacterial_k127_13638752	SM1000_SM1000_MG_bacterial_k127_13638752	MG_bacterial	yes	41168	No	81	17	1	Low-quality	Genome-fragment	47.66	HMM-based (lower-bound)	1		11	0.9682	7	53.5614	Viruses;Duplodnaviria;Heunggongvirae;Uroviricota;Caudoviricetes	dsDNA	Prokaryote	Duplodnaviria	Heunggongvirae	Uroviricota	Caudoviricetes
SM1000_MG_bacterial_k127_13638755	SM1000_SM1000_MG_bacterial_k127_13638755	MG_bacterial	yes	40661	No	77	28	1	Complete	High-quality	100	DTR (medium-confidence)	1		11	0.977	17	55.542	Viruses;Duplodnaviria;Heunggongvirae;Uroviricota;Caudoviricetes	dsDNA	Prokaryote	Duplodnaviria	Heunggongvirae	Uroviricota	Caudoviricetes
SM1000_MG_bacterial_k127_13638759	SM1000_SM1000_MG_bacterial_k127_13638759	MG_bacterial	yes	42036	No	59	18	1	Medium-quality	Genome-fragment	63.59	HMM-based (lower-bound)	1		11	0.9543	12	42.9844	Viruses;Duplodnaviria;Heunggongvirae;Uroviricota;Caudoviricetes	dsDNA	Prokaryote	Duplodnaviria	Heunggongvirae	Uroviricota	Caudoviricetes
SM1000_MG_bacterial_k127_13638760	SM1000_SM1000_MG_bacterial_k127_13638760,SM1005_SM1005_MG_bacterial_k127_10243700_1_4182_11888	MG_bacterial	yes	38630	No	57	17	4	Medium-quality	Genome-fragment	53.29	HMM-based (lower-bound)	1		11	0.9392	6	22.6594	Viruses;Duplodnaviria;Heunggongvirae;Uroviricota;Caudoviricetes	dsDNA	Prokaryote	Duplodnaviria	Heunggongvirae	Uroviricota	Caudoviricetes
SM1000_MG_bacterial_k127_13638874	SM1000_SM1000_MG_bacterial_k127_13638874	MG_bacterial	yes	41387	No	67	29	0	Complete	High-quality	100	DTR (high-confidence)	1		11	0.979	9	55.1825	Viruses;Duplodnaviria;Heunggongvirae;Uroviricota;Caudoviricetes	dsDNA	Prokaryote	Duplodnaviria	Heunggongvirae	Uroviricota	Caudoviricetes
SM1000_MG_bacterial_k127_13638903	SM1000_SM1000_MG_bacterial_k127_13638903	MG_bacterial	yes	42928	No	59	2	0	Complete	High-quality	100	DTR (high-confidence)	1		11	0.9495	3	30.2907	Viruses;Duplodnaviria;Heunggongvirae;Uroviricota;Caudoviricetes	dsDNA	Prokaryote	Duplodnaviria	Heunggongvirae	Uroviricota	Caudoviricetes
SM1000_MG_bacterial_k127_13639109	SM1000_SM1000_MG_bacterial_k127_13639109	MG_bacterial	yes	17072	No	22	7	0	Low-quality	Genome-fragment	49.44	AAI-based (medium-confidence)	1.01		11	0.9186	3	14.8208	Viruses;Duplodnaviria;Heunggongvirae;Uroviricota;Caudoviricetes	dsDNA	Prokaryote	Duplodnaviria	Heunggongvirae	Uroviricota	Caudoviricetes
SM1000_MG_bacterial_k127_1379038	SM1000_SM1000_MG_bacterial_k127_1379038	MG_bacterial	yes	16883	No	12	1	0	Low-quality	Genome-fragment	9.26	HMM-based (lower-bound)	1		11	0.9633	0	4.2303	Viruses;Duplodnaviria;Heunggongvirae;Uroviricota;Caudoviricetes	dsDNA	Prokaryote	Duplodnaviria	Heunggongvirae	Uroviricota	Caudoviricetes
SM1000_MG_bacterial_k127_1379141	SM1000_SM1000_MG_bacterial_k127_1379141	MG_bacterial	yes	14768	No	21	5	0	Low-quality	Genome-fragment	34.43	AAI-based (medium-confidence)	1		11	0.9737	3	18.6354	Viruses;Duplodnaviria;Heunggongvirae;Uroviricota;Caudoviricetes	dsDNA	Prokaryote	Duplodnaviria	Heunggongvirae	Uroviricota	Caudoviricetes
SM1000_MG_bacterial_k127_1447984	SM1000_SM1000_MG_bacterial_k127_1447984	MG_bacterial	yes	23494	No	51	4	2	Low-quality	Genome-fragment	28.06	AAI-based (medium-confidence)	1		11	0.9778	0	10.2312	Viruses;Duplodnaviria;Heunggongvirae;Uroviricota;Caudoviricetes	dsDNA	Prokaryote	Duplodnaviria	Heunggongvirae	Uroviricota	Caudoviricetes
SM1000_MG_bacterial_k127_1598747	SM1000_SM1000_MG_bacterial_k127_1598747	MG_bacterial	yes	38131	No	50	8	2	Medium-quality	Genome-fragment	70.15	AAI-based (medium-confidence)	1		11	0.9717	8	39.5064	Viruses;Duplodnaviria;Heunggongvirae;Uroviricota;Caudoviricetes	dsDNA	Prokaryote	Duplodnaviria	Heunggongvirae	Uroviricota	Caudoviricetes
SM1000_MG_bacterial_k127_1715923	SM1000_SM1000_MG_bacterial_k127_1715923	MG_bacterial	yes	43085	No	66	10	0	Low-quality	Genome-fragment	48	HMM-based (lower-bound)	1		11	0.9711	5	25.8008	Viruses;Duplodnaviria;Heunggongvirae;Uroviricota;Caudoviricetes	dsDNA	Prokaryote	Duplodnaviria	Heunggongvirae	Uroviricota	Caudoviricetes
SM1000_MG_bacterial_k127_1834234	SM1000_SM1000_MG_bacterial_k127_1834234	MG_bacterial	yes	33899	No	62	17	0	Medium-quality	Genome-fragment	58.28	AAI-based (medium-confidence)	1		11	0.9787	11	49.2585	Viruses;Duplodnaviria;Heunggongvirae;Uroviricota;Caudoviricetes	dsDNA	Prokaryote	Duplodnaviria	Heunggongvirae	Uroviricota	Caudoviricetes
SM1000_MG_bacterial_k127_1960390	SM1000_SM1000_MG_bacterial_k127_1960390	MG_bacterial	yes	24187	No	36	6	0	Low-quality	Genome-fragment	34.04	AAI-based (medium-confidence)	1		11	0.9587	5	16.6828	Viruses;Duplodnaviria;Heunggongvirae;Uroviricota;Caudoviricetes	dsDNA	Prokaryote	Duplodnaviria	Heunggongvirae	Uroviricota	Caudoviricetes
SM1000_MG_bacterial_k127_2010271	SM1000_SM1000_MG_bacterial_k127_2010271	MG_bacterial	yes	10609	No	15	3	0	Low-quality	Genome-fragment	5.77	HMM-based (lower-bound)	1		11	0.9752	2	5.4043	Viruses;Duplodnaviria;Heunggongvirae;Uroviricota;Caudoviricetes	dsDNA	Prokaryote	Duplodnaviria	Heunggongvirae	Uroviricota	Caudoviricetes
SM1000_MG_bacterial_k127_2075825	SM1000_SM1000_MG_bacterial_k127_2075825	MG_bacterial	yes	59497	No	69	13	2	Complete	High-quality	100	DTR (high-confidence)	1		11	0.9675	2	30.8094	Viruses;Duplodnaviria;Heunggongvirae;Uroviricota;Caudoviricetes	dsDNA	Prokaryote	Duplodnaviria	Heunggongvirae	Uroviricota	Caudoviricetes
SM1000_MG_bacterial_k127_2123060	SM1000_SM1000_MG_bacterial_k127_2123060	MG_bacterial	yes	26117	No	31	13	0	Low-quality	Genome-fragment	30.93	HMM-based (lower-bound)	1.01		11	0.9758	8	36.4452	Viruses;Duplodnaviria;Heunggongvirae;Uroviricota;Caudoviricetes	dsDNA	Prokaryote	Duplodnaviria	Heunggongvirae	Uroviricota	Caudoviricetes
SM1000_MG_bacterial_k127_222872	SM1000_SM1000_MG_bacterial_k127_222872	MG_bacterial	yes	18122	No	27	5	0	Low-quality	Genome-fragment	35.58	AAI-based (medium-confidence)	1		11	0.981	1	12.6569	Viruses;Duplodnaviria;Heunggongvirae;Uroviricota;Caudoviricetes	dsDNA	Prokaryote	Duplodnaviria	Heunggongvirae	Uroviricota	Caudoviricetes
SM1000_MG_bacterial_k127_2268065	SM1000_SM1000_MG_bacterial_k127_2268065	MG_bacterial	yes	25563	No	45	6	1	Medium-quality	Genome-fragment	57.96	AAI-based (medium-confidence)	1		11	0.9594	2	14.5272	Viruses;Duplodnaviria;Heunggongvirae;Uroviricota;Caudoviricetes	dsDNA	Prokaryote	Duplodnaviria	Heunggongvirae	Uroviricota	Caudoviricetes
SM1000_MG_bacterial_k127_2542246_12919_46217	SM1000_SM1000_MG_bacterial_k127_2542246_12919_46217	MG_bacterial	yes	33299	Yes	33	4	0	Medium-quality	Genome-fragment	71.23	AAI-based (medium-confidence)	1	12919-46217	11	0.9667	4	17.8659	Viruses;Duplodnaviria;Heunggongvirae;Uroviricota;Caudoviricetes	dsDNA	Prokaryote	Duplodnaviria	Heunggongvirae	Uroviricota	Caudoviricetes
SM1000_MG_bacterial_k127_2612631	SM1000_SM1000_MG_bacterial_k127_2612631	MG_bacterial	yes	11966	No	17	6	1	Low-quality	Genome-fragment	25.89	AAI-based (high-confidence)	1		11	0.9732	5	17.8141	Viruses;Duplodnaviria;Heunggongvirae;Uroviricota;Caudoviricetes	dsDNA	Prokaryote	Duplodnaviria	Heunggongvirae	Uroviricota	Caudoviricetes
SM1000_MG_bacterial_k127_2673510	SM1000_SM1000_MG_bacterial_k127_2673510	MG_bacterial	yes	11144	No	16	1	0	Low-quality	Genome-fragment	10.2	HMM-based (lower-bound)	1		11	0.9419	0	5.1313	Viruses;Duplodnaviria;Heunggongvirae;Uroviricota;Caudoviricetes	dsDNA	Prokaryote	Duplodnaviria	Heunggongvirae	Uroviricota	Caudoviricetes
SM1000_MG_bacterial_k127_2819885	SM1000_SM1000_MG_bacterial_k127_2819885	MG_bacterial	yes	16934	No	26	3	1	Low-quality	Genome-fragment	23.63	AAI-based (medium-confidence)	1		11	0.9634	2	10.1768	Viruses;Duplodnaviria;Heunggongvirae;Uroviricota;Caudoviricetes	dsDNA	Prokaryote	Duplodnaviria	Heunggongvirae	Uroviricota	Caudoviricetes
SM1000_MG_bacterial_k127_2944855	SM1000_SM1000_MG_bacterial_k127_2944855	MG_bacterial	yes	12733	No	21	6	1	Low-quality	Genome-fragment	23.04	HMM-based (lower-bound)	1		11	0.8745	3	17.1149	Viruses;Duplodnaviria;Heunggongvirae;Uroviricota;Caudoviricetes	dsDNA	Prokaryote	Duplodnaviria	Heunggongvirae	Uroviricota	Caudoviricetes
SM1000_MG_bacterial_k127_29467_29919_67598	SM1000_SM1000_MG_bacterial_k127_29467_29919_67598	MG_bacterial	yes	37680	Yes	42	24	3	High-quality	High-quality	93.73	AAI-based (high-confidence)	1	29919-67598	11	0.9613	22	46.4691	Viruses;Duplodnaviria;Heunggongvirae;Uroviricota;Caudoviricetes	dsDNA	Prokaryote	Duplodnaviria	Heunggongvirae	Uroviricota	Caudoviricetes
SM1000_MG_bacterial_k127_2995124	SM1000_SM1000_MG_bacterial_k127_2995124	MG_bacterial	yes	12148	No	23	2	2	Low-quality	Genome-fragment	17.34	HMM-based (lower-bound)	1		11	0.848	0	1.0544	Viruses;Duplodnaviria;Heunggongvirae;Uroviricota;Caudoviricetes	dsDNA	Prokaryote	Duplodnaviria	Heunggongvirae	Uroviricota	Caudoviricetes
SM1000_MG_bacterial_k127_3050289	SM1000_SM1000_MG_bacterial_k127_3050289	MG_bacterial	yes	15648	No	35	3	0	Low-quality	Genome-fragment	17.55	HMM-based (lower-bound)	1		11	0.9771	0	10.1877	Viruses;Duplodnaviria;Heunggongvirae;Uroviricota;Caudoviricetes	dsDNA	Prokaryote	Duplodnaviria	Heunggongvirae	Uroviricota	Caudoviricetes
SM1000_MG_bacterial_k127_30609	SM1000_SM1000_MG_bacterial_k127_30609	MG_bacterial	yes	36523	No	64	27	0	Medium-quality	Genome-fragment	66.94	AAI-based (high-confidence)	1		11	0.9766	9	52.9775	Viruses;Duplodnaviria;Heunggongvirae;Uroviricota;Caudoviricetes	dsDNA	Prokaryote	Duplodnaviria	Heunggongvirae	Uroviricota	Caudoviricetes
SM1000_MG_bacterial_k127_3115005	SM1000_SM1000_MG_bacterial_k127_3115005	MG_bacterial	yes	20393	No	30	4	0	Low-quality	Genome-fragment	30.02	AAI-based (medium-confidence)	1		11	0.9581	1	19.1217	Viruses;Duplodnaviria;Heunggongvirae;Uroviricota;Caudoviricetes	dsDNA	Prokaryote	Duplodnaviria	Heunggongvirae	Uroviricota	Caudoviricetes
SM1000_MG_bacterial_k127_3286792	SM1000_SM1000_MG_bacterial_k127_3286792	MG_bacterial	yes	16815	No	26	5	0	Low-quality	Genome-fragment	33.01	AAI-based (medium-confidence)	1		11	0.9799	1	14.2046	Viruses;Duplodnaviria;Heunggongvirae;Uroviricota;Caudoviricetes	dsDNA	Prokaryote	Duplodnaviria	Heunggongvirae	Uroviricota	Caudoviricetes
SM1000_MG_bacterial_k127_3321569	SM1000_SM1000_MG_bacterial_k127_3321569	MG_bacterial	yes	12731	No	22	2	0	Low-quality	Genome-fragment	5.8	HMM-based (lower-bound)	1		11	0.9566	0	5.9748	Viruses;Duplodnaviria;Heunggongvirae;Uroviricota;Caudoviricetes	dsDNA	Prokaryote	Duplodnaviria	Heunggongvirae	Uroviricota	Caudoviricetes
SM1000_MG_bacterial_k127_3349612	SM1000_SM1000_MG_bacterial_k127_3349612	MG_bacterial	yes	10091	No	11	2	0	Low-quality	Genome-fragment	22.27	AAI-based (high-confidence)	1		11	0.9798	2	10.832	Viruses;Duplodnaviria;Heunggongvirae;Uroviricota;Caudoviricetes	dsDNA	Prokaryote	Duplodnaviria	Heunggongvirae	Uroviricota	Caudoviricetes
SM1000_MG_bacterial_k127_3905001	SM1000_SM1000_MG_bacterial_k127_3905001	MG_bacterial	yes	10166	No	18	2	0	Low-quality	Genome-fragment	6.71	HMM-based (lower-bound)	1.01		11	0.967	0	5.9724	Viruses;Duplodnaviria;Heunggongvirae;Uroviricota;Caudoviricetes	dsDNA	Prokaryote	Duplodnaviria	Heunggongvirae	Uroviricota	Caudoviricetes
SM1000_MG_bacterial_k127_4017579	SM1000_SM1000_MG_bacterial_k127_4017579	MG_bacterial	yes	15082	No	24	3	0	Low-quality	Genome-fragment	32.6	AAI-based (medium-confidence)	1		11	0.9722	1	10.7128	Viruses;Duplodnaviria;Heunggongvirae;Uroviricota;Caudoviricetes	dsDNA	Prokaryote	Duplodnaviria	Heunggongvirae	Uroviricota	Caudoviricetes
SM1000_MG_bacterial_k127_4056881	SM1000_SM1000_MG_bacterial_k127_4056881	MG_bacterial	yes	13883	No	14	3	2	Low-quality	Genome-fragment	11.24	HMM-based (lower-bound)	1		11	0.9393	3	7.4987	Viruses;Duplodnaviria;Heunggongvirae;Uroviricota;Caudoviricetes	dsDNA	Prokaryote	Duplodnaviria	Heunggongvirae	Uroviricota	Caudoviricetes
SM1000_MG_bacterial_k127_4104554	SM1000_SM1000_MG_bacterial_k127_4104554	MG_bacterial	yes	16088	No	24	1	1	Low-quality	Genome-fragment	19.94	AAI-based (medium-confidence)	1		11	0.9351	0	4.3731	Viruses;Duplodnaviria;Heunggongvirae;Uroviricota;Caudoviricetes	dsDNA	Prokaryote	Duplodnaviria	Heunggongvirae	Uroviricota	Caudoviricetes
SM1000_MG_bacterial_k127_4131276	SM1000_SM1000_MG_bacterial_k127_4131276	MG_bacterial	yes	41490	No	84	17	1	Medium-quality	Genome-fragment	60.96	HMM-based (lower-bound)	1		11	0.977	7	37.5843	Viruses;Duplodnaviria;Heunggongvirae;Uroviricota;Caudoviricetes	dsDNA	Prokaryote	Duplodnaviria	Heunggongvirae	Uroviricota	Caudoviricetes
SM1000_MG_bacterial_k127_4177684	SM1000_SM1000_MG_bacterial_k127_4177684	MG_bacterial	yes	19453	No	24	6	1	Low-quality	Genome-fragment	3.4	AAI-based (medium-confidence)	1		11	0.9809	6	15.3833	Viruses;Duplodnaviria;Heunggongvirae;Uroviricota;Caudoviricetes	dsDNA	Prokaryote	Duplodnaviria	Heunggongvirae	Uroviricota	Caudoviricetes
SM1000_MG_bacterial_k127_4428837	SM1000_SM1000_MG_bacterial_k127_4428837	MG_bacterial	yes	43305	No	64	27	1	Medium-quality	Genome-fragment	87.42	AAI-based (medium-confidence)	1		11	0.9754	13	53.4977	Viruses;Duplodnaviria;Heunggongvirae;Uroviricota;Caudoviricetes	dsDNA	Prokaryote	Duplodnaviria	Heunggongvirae	Uroviricota	Caudoviricetes
SM1000_MG_bacterial_k127_4431686	SM1000_SM1000_MG_bacterial_k127_4431686	MG_bacterial	yes	17626	No	22	16	0	Low-quality	Genome-fragment	37.02	AAI-based (medium-confidence)	1		11	0.9816	7	28.2135	Viruses;Duplodnaviria;Heunggongvirae;Uroviricota;Caudoviricetes	dsDNA	Prokaryote	Duplodnaviria	Heunggongvirae	Uroviricota	Caudoviricetes
SM1000_MG_bacterial_k127_4498350	SM1000_SM1000_MG_bacterial_k127_4498350	MG_bacterial	yes	16308	No	33	7	0	Low-quality	Genome-fragment	19.37	HMM-based (lower-bound)	1		11	0.9384	2	20.64	Viruses;Duplodnaviria;Heunggongvirae;Uroviricota;Caudoviricetes	dsDNA	Prokaryote	Duplodnaviria	Heunggongvirae	Uroviricota	Caudoviricetes
SM1000_MG_bacterial_k127_4503251	SM1000_SM1000_MG_bacterial_k127_4503251	MG_bacterial	yes	16456	No	12	3	0	Medium-quality	Genome-fragment	50.92	AAI-based (medium-confidence)	1.02		11	0.9828	1	16.5406	Viruses;Duplodnaviria;Heunggongvirae;Uroviricota;Caudoviricetes	dsDNA	Prokaryote	Duplodnaviria	Heunggongvirae	Uroviricota	Caudoviricetes
SM1000_MG_bacterial_k127_4576966	SM1000_SM1000_MG_bacterial_k127_4576966	MG_bacterial	yes	46568	No	65	5	1	High-quality	High-quality	100	AAI-based (high-confidence)	1		11	0.9347	2	24.8256	Viruses;Duplodnaviria;Heunggongvirae;Uroviricota;Caudoviricetes	dsDNA	Prokaryote	Duplodnaviria	Heunggongvirae	Uroviricota	Caudoviricetes
SM1000_MG_bacterial_k127_4588164	SM1000_SM1000_MG_bacterial_k127_4588164	MG_bacterial	yes	29838	No	38	2	0	Medium-quality	Genome-fragment	55.33	AAI-based (medium-confidence)	1		11	0.9606	4	17.8361	Viruses;Duplodnaviria;Heunggongvirae;Uroviricota;Caudoviricetes	dsDNA	Prokaryote	Duplodnaviria	Heunggongvirae	Uroviricota	Caudoviricetes
SM1000_MG_bacterial_k127_4616067	SM1000_SM1000_MG_bacterial_k127_4616067,SM1005_SM1005_MG_bacterial_k127_11672975,SM1031_SM1031_MG_bacterial_k127_4299050	MG_bacterial	yes	15640	No	33	16	0	Low-quality	Genome-fragment	15.99	AAI-based (high-confidence)	1		11	0.9828	1	40.3116	Viruses;Duplodnaviria;Heunggongvirae;Uroviricota;Caudoviricetes	dsDNA	Prokaryote	Duplodnaviria	Heunggongvirae	Uroviricota	Caudoviricetes
SM1000_MG_bacterial_k127_4622749	SM1000_SM1000_MG_bacterial_k127_4622749	MG_bacterial	yes	66331	No	106	23	0	Complete	High-quality	100	DTR (high-confidence)	1		11	0.9791	8	53.3561	Viruses;Duplodnaviria;Heunggongvirae;Uroviricota;Caudoviricetes	dsDNA	Prokaryote	Duplodnaviria	Heunggongvirae	Uroviricota	Caudoviricetes
SM1000_MG_bacterial_k127_4737461	SM1000_SM1000_MG_bacterial_k127_4737461	MG_bacterial	yes	33877	No	44	26	1	High-quality	High-quality	91.99	AAI-based (high-confidence)	1		11	0.9587	19	43.8259	Viruses;Duplodnaviria;Heunggongvirae;Uroviricota;Caudoviricetes	dsDNA	Prokaryote	Duplodnaviria	Heunggongvirae	Uroviricota	Caudoviricetes
SM1000_MG_bacterial_k127_4859274	SM1000_SM1000_MG_bacterial_k127_4859274	MG_bacterial	yes	13081	No	27	1	0	Low-quality	Genome-fragment	8.92	HMM-based (lower-bound)	1.01		11	0.8705	0	0.63	Viruses;Duplodnaviria;Heunggongvirae;Uroviricota;Caudoviricetes	dsDNA	Prokaryote	Duplodnaviria	Heunggongvirae	Uroviricota	Caudoviricetes
SM1000_MG_bacterial_k127_5022000	SM1000_SM1000_MG_bacterial_k127_5022000	MG_bacterial	yes	12917	No	14	3	0	Low-quality	Genome-fragment	21.52	AAI-based (medium-confidence)	1		11	0.9819	2	15.4466	Viruses;Duplodnaviria;Heunggongvirae;Uroviricota;Caudoviricetes	dsDNA	Prokaryote	Duplodnaviria	Heunggongvirae	Uroviricota	Caudoviricetes
SM1000_MG_bacterial_k127_5129563	SM1000_SM1000_MG_bacterial_k127_5129563	MG_bacterial	yes	41796	No	70	18	0	Complete	High-quality	100	DTR (high-confidence)	1		11	0.9779	2	54.8321	Viruses;Duplodnaviria;Heunggongvirae;Uroviricota;Caudoviricetes	dsDNA	Prokaryote	Duplodnaviria	Heunggongvirae	Uroviricota	Caudoviricetes
SM1000_MG_bacterial_k127_5169765	SM1000_SM1000_MG_bacterial_k127_5169765	MG_bacterial	yes	12304	No	13	1	0	Low-quality	Genome-fragment	16.89	AAI-based (medium-confidence)	1		11	0.9331	2	5.6919	Viruses;Duplodnaviria;Heunggongvirae;Uroviricota;Caudoviricetes	dsDNA	Prokaryote	Duplodnaviria	Heunggongvirae	Uroviricota	Caudoviricetes
SM1000_MG_bacterial_k127_5456848_3_28867	SM1000_SM1000_MG_bacterial_k127_5456848_3_28867	MG_bacterial	yes	28865	Yes	43	5	1	Low-quality	Genome-fragment	34.17	HMM-based (lower-bound)	1	3-28867	11	0.9684	3	20.0059	Viruses;Duplodnaviria;Heunggongvirae;Uroviricota;Caudoviricetes	dsDNA	Prokaryote	Duplodnaviria	Heunggongvirae	Uroviricota	Caudoviricetes
SM1000_MG_bacterial_k127_5641550	SM1000_SM1000_MG_bacterial_k127_5641550	MG_bacterial	yes	10552	No	15	1	0	Low-quality	Genome-fragment	15.64	HMM-based (lower-bound)	1		11	0.9757	0	9.7512	Viruses;Duplodnaviria;Heunggongvirae;Uroviricota;Caudoviricetes	dsDNA	Prokaryote	Duplodnaviria	Heunggongvirae	Uroviricota	Caudoviricetes
SM1000_MG_bacterial_k127_5751932	SM1000_SM1000_MG_bacterial_k127_5751932	MG_bacterial	yes	10330	No	25	3	0	Low-quality	Genome-fragment	11.14	HMM-based (lower-bound)	1		11	0.9718	0	9.939	Viruses;Duplodnaviria;Heunggongvirae;Uroviricota;Caudoviricetes	dsDNA	Prokaryote	Duplodnaviria	Heunggongvirae	Uroviricota	Caudoviricetes
SM1000_MG_bacterial_k127_575794	SM1000_SM1000_MG_bacterial_k127_575794	MG_bacterial	yes	64411	No	101	16	1	High-quality	High-quality	100	AAI-based (medium-confidence)	1		11	0.9723	6	56.0885	Viruses;Duplodnaviria;Heunggongvirae;Uroviricota;Caudoviricetes	dsDNA	Prokaryote	Duplodnaviria	Heunggongvirae	Uroviricota	Caudoviricetes
SM1000_MG_bacterial_k127_613978	SM1000_SM1000_MG_bacterial_k127_613978	MG_bacterial	yes	10711	No	21	3	0	Low-quality	Genome-fragment	22.71	AAI-based (medium-confidence)	1		11	0.9287	0	9.0934	Viruses;Duplodnaviria;Heunggongvirae;Uroviricota;Caudoviricetes	dsDNA	Prokaryote	Duplodnaviria	Heunggongvirae	Uroviricota	Caudoviricetes
SM1000_MG_bacterial_k127_6189995	SM1000_SM1000_MG_bacterial_k127_6189995	MG_bacterial	yes	13169	No	10	1	0	Low-quality	Genome-fragment	23.2	AAI-based (medium-confidence)	1		11	0.9685	1	8.0288	Viruses;Duplodnaviria;Heunggongvirae;Uroviricota;Caudoviricetes	dsDNA	Prokaryote	Duplodnaviria	Heunggongvirae	Uroviricota	Caudoviricetes
SM1000_MG_bacterial_k127_6257100	SM1000_SM1000_MG_bacterial_k127_6257100	MG_bacterial	yes	13951	No	16	5	0	Low-quality	Genome-fragment	14.56	AAI-based (medium-confidence)	1		11	0.9784	0	15.6197	Viruses;Duplodnaviria;Heunggongvirae;Uroviricota;Caudoviricetes	dsDNA	Prokaryote	Duplodnaviria	Heunggongvirae	Uroviricota	Caudoviricetes
SM1000_MG_bacterial_k127_6416913	SM1000_SM1000_MG_bacterial_k127_6416913	MG_bacterial	yes	12296	No	21	4	0	Low-quality	Genome-fragment	12.79	AAI-based (medium-confidence)	1		11	0.9801	0	12.6228	Viruses;Duplodnaviria;Heunggongvirae;Uroviricota;Caudoviricetes	dsDNA	Prokaryote	Duplodnaviria	Heunggongvirae	Uroviricota	Caudoviricetes
SM1000_MG_bacterial_k127_6433522	SM1000_SM1000_MG_bacterial_k127_6433522	MG_bacterial	yes	36875	No	61	3	0	Low-quality	Genome-fragment	27.21	HMM-based (lower-bound)	1		11	0.9474	3	23.0502	Viruses;Duplodnaviria;Heunggongvirae;Uroviricota;Caudoviricetes	dsDNA	Prokaryote	Duplodnaviria	Heunggongvirae	Uroviricota	Caudoviricetes
SM1000_MG_bacterial_k127_643948	SM1000_SM1000_MG_bacterial_k127_643948	MG_bacterial	yes	11923	No	20	4	1	Low-quality	Genome-fragment	29.51	AAI-based (medium-confidence)	1		11	0.9809	0	18.9413	Viruses;Duplodnaviria;Heunggongvirae;Uroviricota;Caudoviricetes	dsDNA	Prokaryote	Duplodnaviria	Heunggongvirae	Uroviricota	Caudoviricetes
SM1000_MG_bacterial_k127_6615465	SM1000_SM1000_MG_bacterial_k127_6615465	MG_bacterial	yes	11474	No	24	3	1	Low-quality	Genome-fragment	11.77	HMM-based (lower-bound)	1		11	0.9662	0	9.1551	Viruses;Duplodnaviria;Heunggongvirae;Uroviricota;Caudoviricetes	dsDNA	Prokaryote	Duplodnaviria	Heunggongvirae	Uroviricota	Caudoviricetes
SM1000_MG_bacterial_k127_6831099	SM1000_SM1000_MG_bacterial_k127_6831099	MG_bacterial	yes	20885	No	26	6	1	Medium-quality	Genome-fragment	52.47	AAI-based (medium-confidence)	1		11	0.9689	6	18.4567	Viruses;Duplodnaviria;Heunggongvirae;Uroviricota;Caudoviricetes	dsDNA	Prokaryote	Duplodnaviria	Heunggongvirae	Uroviricota	Caudoviricetes
SM1000_MG_bacterial_k127_6836590	SM1000_SM1000_MG_bacterial_k127_6836590	MG_bacterial	yes	10012	No	12	1	1	Low-quality	Genome-fragment	1.75	AAI-based (medium-confidence)	1		11	0.978	1	6.851	Viruses;Duplodnaviria;Heunggongvirae;Uroviricota;Caudoviricetes	dsDNA	Prokaryote	Duplodnaviria	Heunggongvirae	Uroviricota	Caudoviricetes
SM1000_MG_bacterial_k127_6893165	SM1000_SM1000_MG_bacterial_k127_6893165	MG_bacterial	yes	20969	No	33	8	2	Low-quality	Genome-fragment	35.37	AAI-based (medium-confidence)	1		11	0.9749	5	23.6424	Viruses;Duplodnaviria;Heunggongvirae;Uroviricota;Caudoviricetes	dsDNA	Prokaryote	Duplodnaviria	Heunggongvirae	Uroviricota	Caudoviricetes
SM1000_MG_bacterial_k127_691301	SM1000_SM1000_MG_bacterial_k127_691301	MG_bacterial	yes	29183	No	36	16	1	Low-quality	Genome-fragment	40.6	HMM-based (lower-bound)	1.01		11	0.9716	11	31.4645	Viruses;Duplodnaviria;Heunggongvirae;Uroviricota;Caudoviricetes	dsDNA	Prokaryote	Duplodnaviria	Heunggongvirae	Uroviricota	Caudoviricetes
SM1000_MG_bacterial_k127_6986028	SM1000_SM1000_MG_bacterial_k127_6986028	MG_bacterial	yes	15455	No	36	8	0	Low-quality	Genome-fragment	20.05	AAI-based (medium-confidence)	1		11	0.9479	0	13.4308	Viruses;Duplodnaviria;Heunggongvirae;Uroviricota;Caudoviricetes	dsDNA	Prokaryote	Duplodnaviria	Heunggongvirae	Uroviricota	Caudoviricetes
SM1000_MG_bacterial_k127_7050801	SM1000_SM1000_MG_bacterial_k127_7050801	MG_bacterial	yes	14902	No	8	1	0	Low-quality	Genome-fragment	20.19	AAI-based (medium-confidence)	1		11	0.9299	0	4.3463	Viruses;Duplodnaviria;Heunggongvirae;Uroviricota;Caudoviricetes	dsDNA	Prokaryote	Duplodnaviria	Heunggongvirae	Uroviricota	Caudoviricetes
SM1000_MG_bacterial_k127_7128149	SM1000_SM1000_MG_bacterial_k127_7128149	MG_bacterial	yes	22325	No	34	4	0	Low-quality	Genome-fragment	25.02	HMM-based (lower-bound)	1		11	0.9798	4	19.5486	Viruses;Duplodnaviria;Heunggongvirae;Uroviricota;Caudoviricetes	dsDNA	Prokaryote	Duplodnaviria	Heunggongvirae	Uroviricota	Caudoviricetes
SM1000_MG_bacterial_k127_7279054	SM1000_SM1000_MG_bacterial_k127_7279054	MG_bacterial	yes	11804	No	14	1	0	Low-quality	Genome-fragment	13.95	HMM-based (lower-bound)	1		11	0.9149	2	4.889	Viruses;Duplodnaviria;Heunggongvirae;Uroviricota;Caudoviricetes	dsDNA	Prokaryote	Duplodnaviria	Heunggongvirae	Uroviricota	Caudoviricetes
SM1000_MG_bacterial_k127_7497122	SM1000_SM1000_MG_bacterial_k127_7497122	MG_bacterial	yes	57883	No	83	6	2	Medium-quality	Genome-fragment	59.95	HMM-based (lower-bound)	1		11	0.97	5	34.2011	Viruses;Duplodnaviria;Heunggongvirae;Uroviricota;Caudoviricetes	dsDNA	Prokaryote	Duplodnaviria	Heunggongvirae	Uroviricota	Caudoviricetes
SM1000_MG_bacterial_k127_7617095	SM1000_SM1000_MG_bacterial_k127_7617095	MG_bacterial	yes	12254	No	19	6	0	Low-quality	Genome-fragment	19.47	HMM-based (lower-bound)	1		11	0.9786	7	14.2484	Viruses;Duplodnaviria;Heunggongvirae;Uroviricota;Caudoviricetes	dsDNA	Prokaryote	Duplodnaviria	Heunggongvirae	Uroviricota	Caudoviricetes
SM1000_MG_bacterial_k127_7676223	SM1000_SM1000_MG_bacterial_k127_7676223	MG_bacterial	yes	10132	No	22	5	0	Low-quality	Genome-fragment	21.31	AAI-based (medium-confidence)	1		11	0.9741	4	17.1502	Viruses;Duplodnaviria;Heunggongvirae;Uroviricota;Caudoviricetes	dsDNA	Prokaryote	Duplodnaviria	Heunggongvirae	Uroviricota	Caudoviricetes
SM1000_MG_bacterial_k127_7848006	SM1000_SM1000_MG_bacterial_k127_7848006	MG_bacterial	yes	12203	No	13	1	0	Low-quality	Genome-fragment	5.23	HMM-based (lower-bound)	1		11	0.9387	0	3.0708	Viruses;Duplodnaviria;Heunggongvirae;Uroviricota;Caudoviricetes;Ackermannviridae	dsDNA	Prokaryote	Duplodnaviria	Heunggongvirae	Uroviricota	Caudoviricetes		Ackermannviridae
SM1000_MG_bacterial_k127_8402468	SM1000_SM1000_MG_bacterial_k127_8402468	MG_bacterial	yes	45785	No	63	9	0	Complete	High-quality	100	DTR (high-confidence)	1		11	0.9411	5	31.9485	Viruses;Duplodnaviria;Heunggongvirae;Uroviricota;Caudoviricetes	dsDNA	Prokaryote	Duplodnaviria	Heunggongvirae	Uroviricota	Caudoviricetes
SM1000_MG_bacterial_k127_8408253	SM1000_SM1000_MG_bacterial_k127_8408253,SM1031_SM1031_MG_bacterial_k127_3242507,SM1005_SM1005_MG_bacterial_k127_15500183	MG_bacterial	yes	43088	No	62	44	0	Low-quality	Genome-fragment	44.14	AAI-based (high-confidence)	1		11	0.9832	11	86.5055	Viruses;Duplodnaviria;Heunggongvirae;Uroviricota;Caudoviricetes	dsDNA	Prokaryote	Duplodnaviria	Heunggongvirae	Uroviricota	Caudoviricetes
SM1000_MG_bacterial_k127_8455055	SM1000_SM1000_MG_bacterial_k127_8455055	MG_bacterial	yes	28072	No	30	10	0	Medium-quality	Genome-fragment	64.61	AAI-based (medium-confidence)	1		11	0.9775	5	25.9731	Viruses;Duplodnaviria;Heunggongvirae;Uroviricota;Caudoviricetes	dsDNA	Prokaryote	Duplodnaviria	Heunggongvirae	Uroviricota	Caudoviricetes
SM1000_MG_bacterial_k127_8746148	SM1000_SM1000_MG_bacterial_k127_8746148,SM1031_SM1031_MG_bacterial_k127_412755	MG_bacterial	yes	30867	No	67	30	0	Low-quality	Genome-fragment	31.35	AAI-based (high-confidence)	1		11	0.9827	0	65.8364	Viruses;Duplodnaviria;Heunggongvirae;Uroviricota;Caudoviricetes	dsDNA	Prokaryote	Duplodnaviria	Heunggongvirae	Uroviricota	Caudoviricetes
SM1000_MG_bacterial_k127_896596	SM1000_SM1000_MG_bacterial_k127_896596	MG_bacterial	yes	11709	No	21	1	0	Low-quality	Genome-fragment	10.72	HMM-based (lower-bound)	1		11	0.9434	0	5.9331	Viruses;Duplodnaviria;Heunggongvirae;Uroviricota;Caudoviricetes	dsDNA	Prokaryote	Duplodnaviria	Heunggongvirae	Uroviricota	Caudoviricetes
SM1000_MG_bacterial_k127_9036416	SM1000_SM1000_MG_bacterial_k127_9036416	MG_bacterial	yes	40254	No	72	9	2	Complete	High-quality	100	DTR (high-confidence)	1		11	0.9598	9	36.0017	Viruses;Duplodnaviria;Heunggongvirae;Uroviricota;Caudoviricetes	dsDNA	Prokaryote	Duplodnaviria	Heunggongvirae	Uroviricota	Caudoviricetes
SM1000_MG_bacterial_k127_9042033	SM1000_SM1000_MG_bacterial_k127_9042033	MG_bacterial	yes	10827	No	14	4	0	Low-quality	Genome-fragment	10.91	AAI-based (medium-confidence)	1		11	0.9708	2	7.474	Viruses;Duplodnaviria;Heunggongvirae;Uroviricota;Caudoviricetes	dsDNA	Prokaryote	Duplodnaviria	Heunggongvirae	Uroviricota	Caudoviricetes
SM1000_MG_bacterial_k127_9049638	SM1000_SM1000_MG_bacterial_k127_9049638	MG_bacterial	yes	37839	No	70	2	1	Low-quality	Genome-fragment	47.93	HMM-based (lower-bound)	1		11	0.9629	3	11.9944	Viruses;Duplodnaviria;Heunggongvirae;Uroviricota;Caudoviricetes	dsDNA	Prokaryote	Duplodnaviria	Heunggongvirae	Uroviricota	Caudoviricetes
SM1000_MG_bacterial_k127_9062530_10470_46043	SM1000_SM1000_MG_bacterial_k127_9062530_10470_46043	MG_bacterial	yes	35574	Yes	52	14	0	Medium-quality	Genome-fragment	87.85	AAI-based (medium-confidence)	1	10470-46043	11	0.9454	9	31.7061	Viruses;Duplodnaviria;Heunggongvirae;Uroviricota;Caudoviricetes	dsDNA	Prokaryote	Duplodnaviria	Heunggongvirae	Uroviricota	Caudoviricetes
SM1000_MG_bacterial_k127_9149486	SM1000_SM1000_MG_bacterial_k127_9149486	MG_bacterial	yes	13532	No	17	3	0	Low-quality	Genome-fragment	18.3	AAI-based (medium-confidence)	1		11	0.9743	7	12.9342	Viruses;Duplodnaviria;Heunggongvirae;Uroviricota;Caudoviricetes	dsDNA	Prokaryote	Duplodnaviria	Heunggongvirae	Uroviricota	Caudoviricetes
SM1000_MG_bacterial_k127_9169585	SM1000_SM1000_MG_bacterial_k127_9169585	MG_bacterial	yes	10853	No	15	2	0	Low-quality	Genome-fragment	1.9	AAI-based (medium-confidence)	1		11	0.8931	1	1.1362	Viruses;Duplodnaviria;Heunggongvirae;Uroviricota;Caudoviricetes	dsDNA	Prokaryote	Duplodnaviria	Heunggongvirae	Uroviricota	Caudoviricetes
SM1000_MG_bacterial_k127_9271586	SM1000_SM1000_MG_bacterial_k127_9271586	MG_bacterial	yes	27964	No	29	2	0	Low-quality	Genome-fragment	29.05	HMM-based (lower-bound)	1		11	0.9697	2	10.8404	Viruses;Duplodnaviria;Heunggongvirae;Uroviricota;Caudoviricetes	dsDNA	Prokaryote	Duplodnaviria	Heunggongvirae	Uroviricota	Caudoviricetes
SM1000_MG_bacterial_k127_9305735	SM1000_SM1000_MG_bacterial_k127_9305735	MG_bacterial	yes	16020	No	19	8	1	Low-quality	Genome-fragment	35.24	AAI-based (medium-confidence)	1		11	0.9805	7	21.9719	Viruses;Duplodnaviria;Heunggongvirae;Uroviricota;Caudoviricetes	dsDNA	Prokaryote	Duplodnaviria	Heunggongvirae	Uroviricota	Caudoviricetes
SM1000_MG_bacterial_k127_9413392	SM1000_SM1000_MG_bacterial_k127_9413392	MG_bacterial	yes	13878	No	11	2	0	Low-quality	Genome-fragment	15.83	HMM-based (lower-bound)	1		11	0.9589	0	5.0723	Viruses;Duplodnaviria;Heunggongvirae;Uroviricota;Caudoviricetes	dsDNA	Prokaryote	Duplodnaviria	Heunggongvirae	Uroviricota	Caudoviricetes
SM1000_MG_bacterial_k127_9414910	SM1000_SM1000_MG_bacterial_k127_9414910	MG_bacterial	yes	11852	No	14	1	0	Low-quality	Genome-fragment	19.31	HMM-based (lower-bound)	1		11	0.9777	0	4.0018	Viruses;Duplodnaviria;Heunggongvirae;Uroviricota;Caudoviricetes	dsDNA	Prokaryote	Duplodnaviria	Heunggongvirae	Uroviricota	Caudoviricetes
SM1000_MG_bacterial_k127_9467757	SM1000_SM1000_MG_bacterial_k127_9467757	MG_bacterial	yes	13080	No	30	2	0	Low-quality	Genome-fragment	11.85	HMM-based (lower-bound)	1		11	0.9608	0	9.8149	Viruses;Duplodnaviria;Heunggongvirae;Uroviricota;Caudoviricetes	dsDNA	Prokaryote	Duplodnaviria	Heunggongvirae	Uroviricota	Caudoviricetes
SM1000_MG_bacterial_k127_9485928	SM1000_SM1000_MG_bacterial_k127_9485928	MG_bacterial	yes	10303	No	18	3	0	Low-quality	Genome-fragment	15.51	HMM-based (lower-bound)	1		11	0.9811	7	20.1422	Viruses;Duplodnaviria;Heunggongvirae;Uroviricota;Caudoviricetes	dsDNA	Prokaryote	Duplodnaviria	Heunggongvirae	Uroviricota	Caudoviricetes
SM1000_MG_bacterial_k127_9561047	SM1000_SM1000_MG_bacterial_k127_9561047	MG_bacterial	yes	14018	No	18	13	0	Low-quality	Genome-fragment	27.34	AAI-based (medium-confidence)	1		11	0.9263	6	20.0184	Viruses;Duplodnaviria;Heunggongvirae;Uroviricota;Caudoviricetes	dsDNA	Prokaryote	Duplodnaviria	Heunggongvirae	Uroviricota	Caudoviricetes
SM1000_MG_bacterial_k127_9567325	SM1000_SM1000_MG_bacterial_k127_9567325	MG_bacterial	yes	12909	No	25	4	1	Low-quality	Genome-fragment	18.43	HMM-based (lower-bound)	1		11	0.978	0	9.9668	Viruses;Duplodnaviria;Heunggongvirae;Uroviricota;Caudoviricetes	dsDNA	Prokaryote	Duplodnaviria	Heunggongvirae	Uroviricota	Caudoviricetes
SM1000_MG_bacterial_k127_9601378	SM1000_SM1000_MG_bacterial_k127_9601378	MG_bacterial	yes	13494	No	23	4	0	Low-quality	Genome-fragment	17.82	HMM-based (lower-bound)	1		11	0.9595	3	14.5092	Viruses;Duplodnaviria;Heunggongvirae;Uroviricota;Caudoviricetes	dsDNA	Prokaryote	Duplodnaviria	Heunggongvirae	Uroviricota	Caudoviricetes
SM1000_MG_bacterial_k127_9622268	SM1000_SM1000_MG_bacterial_k127_9622268	MG_bacterial	yes	12568	No	15	1	0	Low-quality	Genome-fragment	4.28	AAI-based (medium-confidence)	1		11	0.9708	0	4.4716	Viruses;Duplodnaviria;Heunggongvirae;Uroviricota;Caudoviricetes	dsDNA	Prokaryote	Duplodnaviria	Heunggongvirae	Uroviricota	Caudoviricetes
SM1000_MG_bacterial_k127_9654406	SM1000_SM1000_MG_bacterial_k127_9654406	MG_bacterial	yes	14803	No	28	4	0	Low-quality	Genome-fragment	15.07	HMM-based (lower-bound)	1		11	0.9573	1	6.4841	Viruses;Duplodnaviria;Heunggongvirae;Uroviricota;Caudoviricetes	dsDNA	Prokaryote	Duplodnaviria	Heunggongvirae	Uroviricota	Caudoviricetes
SM1000_MG_bacterial_k127_9663682	SM1000_SM1000_MG_bacterial_k127_9663682	MG_bacterial	yes	14483	No	27	2	0	Low-quality	Genome-fragment	7.65	HMM-based (lower-bound)	1		11	0.9394	0	7.0852	Viruses;Duplodnaviria;Heunggongvirae;Uroviricota;Caudoviricetes	dsDNA	Prokaryote	Duplodnaviria	Heunggongvirae	Uroviricota	Caudoviricetes
SM1000_MG_bacterial_k127_9668279	SM1000_SM1000_MG_bacterial_k127_9668279	MG_bacterial	yes	45149	No	59	10	0	Medium-quality	Genome-fragment	54.66	HMM-based (lower-bound)	1		11	0.961	5	24.4265	Viruses;Duplodnaviria;Heunggongvirae;Uroviricota;Caudoviricetes	dsDNA	Prokaryote	Duplodnaviria	Heunggongvirae	Uroviricota	Caudoviricetes
SM1000_MG_bacterial_k127_970989	SM1000_SM1000_MG_bacterial_k127_970989	MG_bacterial	yes	11721	No	16	6	1	Low-quality	Genome-fragment	27.19	AAI-based (medium-confidence)	1.01		11	0.8351	3	7.8801	Viruses;Duplodnaviria;Heunggongvirae;Uroviricota;Caudoviricetes	dsDNA	Prokaryote	Duplodnaviria	Heunggongvirae	Uroviricota	Caudoviricetes
SM1000_MG_bacterial_k127_9763861	SM1000_SM1000_MG_bacterial_k127_9763861	MG_bacterial	yes	40732	No	73	18	2	Complete	High-quality	100	DTR (high-confidence)	1.01		11	0.9786	6	46.4978	Viruses;Duplodnaviria;Heunggongvirae;Uroviricota;Caudoviricetes	dsDNA	Prokaryote	Duplodnaviria	Heunggongvirae	Uroviricota	Caudoviricetes
SM1000_MG_bacterial_k127_9787220	SM1000_SM1000_MG_bacterial_k127_9787220	MG_bacterial	yes	11063	No	20	8	0	Low-quality	Genome-fragment	25.16	AAI-based (high-confidence)	1		11	0.9758	4	11.8744	Viruses;Duplodnaviria;Heunggongvirae;Uroviricota;Caudoviricetes	dsDNA	Prokaryote	Duplodnaviria	Heunggongvirae	Uroviricota	Caudoviricetes
SM1000_MG_bacterial_k127_9846255	SM1000_SM1000_MG_bacterial_k127_9846255	MG_bacterial	yes	12903	No	34	2	1	Low-quality	Genome-fragment	18.04	HMM-based (lower-bound)	1		11	0.8475	0	5.4264	Viruses;Duplodnaviria;Heunggongvirae;Uroviricota;Caudoviricetes	dsDNA	Prokaryote	Duplodnaviria	Heunggongvirae	Uroviricota	Caudoviricetes
SM1000_MG_bacterial_k127_9888971	SM1000_SM1000_MG_bacterial_k127_9888971	MG_bacterial	yes	26296	No	35	24	0	Low-quality	Genome-fragment	46.82	AAI-based (high-confidence)	1		11	0.9785	15	40.1522	Viruses;Duplodnaviria;Heunggongvirae;Uroviricota;Caudoviricetes	dsDNA	Prokaryote	Duplodnaviria	Heunggongvirae	Uroviricota	Caudoviricetes
SM1000_MG_bacterial_k127_99498	SM1000_SM1000_MG_bacterial_k127_99498	MG_bacterial	yes	18642	No	24	2	0	Low-quality	Genome-fragment	24.82	AAI-based (medium-confidence)	1		11	0.9002	1	7.6255	Viruses;Duplodnaviria;Heunggongvirae;Uroviricota;Caudoviricetes	dsDNA	Prokaryote	Duplodnaviria	Heunggongvirae	Uroviricota	Caudoviricetes
SM1000_MG_EukFloat_scaffold_1	SM1000_MG_EukFloat_scaffold_1	MG_eukfloat	yes	138223	No	228	39	5	High-quality	High-quality	100	AAI-based (high-confidence)	1		11	0.9754	4	83.7101	Viruses;Duplodnaviria;Heunggongvirae;Uroviricota;Caudoviricetes	dsDNA	Prokaryote	Duplodnaviria	Heunggongvirae	Uroviricota	Caudoviricetes
SM1000_MG_EukFloat_scaffold_100	SM1000_MG_EukFloat_scaffold_100	MG_eukfloat	yes	40320	No	64	13	0	Medium-quality	Genome-fragment	68.97	HMM-based (lower-bound)	1		11	0.9727	9	40.7413	Viruses;Duplodnaviria;Heunggongvirae;Uroviricota;Caudoviricetes	dsDNA	Prokaryote	Duplodnaviria	Heunggongvirae	Uroviricota	Caudoviricetes
SM1000_MG_EukFloat_scaffold_1004	SM1000_MG_EukFloat_scaffold_1004	MG_eukfloat	yes	10899	No	13	1	0	Low-quality	Genome-fragment	6.08	HMM-based (lower-bound)	1		11	0.9678	1	2.916	Viruses;Duplodnaviria;Heunggongvirae;Uroviricota;Caudoviricetes	dsDNA	Prokaryote	Duplodnaviria	Heunggongvirae	Uroviricota	Caudoviricetes
SM1000_MG_EukFloat_scaffold_101	SM1000_MG_EukFloat_scaffold_101,SM1005_MG_EukFloat_scaffold_399,SM1002_MG_EukFloat_scaffold_484,SM1004_MG_EukFloat_scaffold_592,SM1028_MG_EukFloat_scaffold_912,SM1029_MG_EukFloat_scaffold_619,SM1027_MG_EukFloat_scaffold_460,SM1050_MG_EukFloat_scaffold_1098,SM1030_MG_EukFloat_scaffold_2823,SM1003_MG_EukFloat_scaffold_6528,SM1003_MG_EukFloat_scaffold_2378,SM1030_MG_EukFloat_scaffold_8449	MG_eukfloat	yes	39520	No	47	7	0	Complete	High-quality	100	DTR (high-confidence)	1.01		11	0.9621	4	19.5853	Viruses;Duplodnaviria;Heunggongvirae;Uroviricota;Caudoviricetes	dsDNA	Prokaryote	Duplodnaviria	Heunggongvirae	Uroviricota	Caudoviricetes
SM1000_MG_EukFloat_scaffold_1016	SM1000_MG_EukFloat_scaffold_1016	MG_eukfloat	yes	10848	No	21	3	0	Low-quality	Genome-fragment	17.63	AAI-based (medium-confidence)	1		11	0.9766	1	11.0462	Viruses;Duplodnaviria;Heunggongvirae;Uroviricota;Caudoviricetes	dsDNA	Prokaryote	Duplodnaviria	Heunggongvirae	Uroviricota	Caudoviricetes
SM1000_MG_EukFloat_scaffold_102|provirus_171_30080	SM1000_MG_EukFloat_scaffold_102|provirus_171_30080	MG_eukfloat	yes	29910	Yes	48	8	0	Medium-quality	Genome-fragment	69.68	AAI-based (medium-confidence)	1	171-30080	11	0.9691	6	29.8767	Viruses;Duplodnaviria;Heunggongvirae;Uroviricota;Caudoviricetes	dsDNA	Prokaryote	Duplodnaviria	Heunggongvirae	Uroviricota	Caudoviricetes
SM1000_MG_EukFloat_scaffold_1029	SM1000_MG_EukFloat_scaffold_1029	MG_eukfloat	yes	10774	No	10	2	0	Low-quality	Genome-fragment	11.89	AAI-based (medium-confidence)	1		11	0.9777	2	6.3863	Viruses;Duplodnaviria;Heunggongvirae;Uroviricota;Caudoviricetes	dsDNA	Prokaryote	Duplodnaviria	Heunggongvirae	Uroviricota	Caudoviricetes
SM1000_MG_EukFloat_scaffold_103	SM1000_MG_EukFloat_scaffold_103	MG_eukfloat	yes	38916	No	48	5	0	Medium-quality	Genome-fragment	85.86	AAI-based (medium-confidence)	1		11	0.959	4	24.953	Viruses;Duplodnaviria;Heunggongvirae;Uroviricota;Caudoviricetes	dsDNA	Prokaryote	Duplodnaviria	Heunggongvirae	Uroviricota	Caudoviricetes
SM1000_MG_EukFloat_scaffold_1035	SM1000_MG_EukFloat_scaffold_1035	MG_eukfloat	yes	10761	No	10	7	0	Low-quality	Genome-fragment	18.47	HMM-based (lower-bound)	1		11	0.9567	0	9.0142	Viruses;Duplodnaviria;Heunggongvirae;Uroviricota;Caudoviricetes	dsDNA	Prokaryote	Duplodnaviria	Heunggongvirae	Uroviricota	Caudoviricetes
SM1000_MG_EukFloat_scaffold_104	SM1000_MG_EukFloat_scaffold_104	MG_eukfloat	yes	38753	No	55	3	2	Low-quality	Genome-fragment	48.13	AAI-based (medium-confidence)	1		11	0.9724	3	12.737	Viruses;Duplodnaviria;Heunggongvirae;Uroviricota;Caudoviricetes	dsDNA	Prokaryote	Duplodnaviria	Heunggongvirae	Uroviricota	Caudoviricetes
SM1000_MG_EukFloat_scaffold_1043	SM1000_MG_EukFloat_scaffold_1043	MG_eukfloat	yes	10727	No	19	2	0	Low-quality	Genome-fragment	8.96	HMM-based (lower-bound)	1		11	0.8568	0	5.3825	Viruses;Duplodnaviria;Heunggongvirae;Uroviricota;Caudoviricetes	dsDNA	Prokaryote	Duplodnaviria	Heunggongvirae	Uroviricota	Caudoviricetes
SM1000_MG_EukFloat_scaffold_1049	SM1000_MG_EukFloat_scaffold_1049	MG_eukfloat	yes	10710	No	7	1	0	Low-quality	Genome-fragment	7.18	HMM-based (lower-bound)	1		11	0.9653	1	5.1262	Viruses;Duplodnaviria;Heunggongvirae;Uroviricota;Caudoviricetes	dsDNA	Prokaryote	Duplodnaviria	Heunggongvirae	Uroviricota	Caudoviricetes
SM1000_MG_EukFloat_scaffold_107	SM1000_MG_EukFloat_scaffold_107	MG_eukfloat	yes	38604	No	64	16	0	High-quality	High-quality	97.6	AAI-based (high-confidence)	1		11	0.9702	5	50.5331	Viruses;Duplodnaviria;Heunggongvirae;Uroviricota;Caudoviricetes	dsDNA	Prokaryote	Duplodnaviria	Heunggongvirae	Uroviricota	Caudoviricetes
SM1000_MG_EukFloat_scaffold_1074	SM1000_MG_EukFloat_scaffold_1074	MG_eukfloat	yes	10601	No	19	10	0	Low-quality	Genome-fragment	12.16	HMM-based (lower-bound)	1		11	0.9476	4	18.9884	Viruses;Duplodnaviria;Heunggongvirae;Uroviricota;Caudoviricetes	dsDNA	Prokaryote	Duplodnaviria	Heunggongvirae	Uroviricota	Caudoviricetes
SM1000_MG_EukFloat_scaffold_1076	SM1000_MG_EukFloat_scaffold_1076	MG_eukfloat	yes	10592	No	26	3	0	Low-quality	Genome-fragment	9.46	HMM-based (lower-bound)	1		11	0.9522	1	8.7393	Viruses;Duplodnaviria;Heunggongvirae;Uroviricota;Caudoviricetes	dsDNA	Prokaryote	Duplodnaviria	Heunggongvirae	Uroviricota	Caudoviricetes
SM1000_MG_EukFloat_scaffold_1077	SM1000_MG_EukFloat_scaffold_1077	MG_eukfloat	yes	10580	No	11	1	0	Low-quality	Genome-fragment	22.23	HMM-based (lower-bound)	1		11	0.7735	1	2.8984	Viruses;Duplodnaviria;Heunggongvirae;Uroviricota;Caudoviricetes	dsDNA	Prokaryote	Duplodnaviria	Heunggongvirae	Uroviricota	Caudoviricetes
SM1000_MG_EukFloat_scaffold_1098	SM1000_MG_EukFloat_scaffold_1098	MG_eukfloat	yes	10502	No	13	3	0	Low-quality	Genome-fragment	13.7	HMM-based (lower-bound)	1		11	0.9696	2	6.81	Viruses;Duplodnaviria;Heunggongvirae;Uroviricota;Caudoviricetes	dsDNA	Prokaryote	Duplodnaviria	Heunggongvirae	Uroviricota	Caudoviricetes
SM1000_MG_EukFloat_scaffold_11	SM1000_MG_EukFloat_scaffold_11	MG_eukfloat	yes	77932	No	85	8	3	Medium-quality	Genome-fragment	78.41	HMM-based (lower-bound)	1		11	0.9416	3	22.6681	Viruses;Duplodnaviria;Heunggongvirae;Uroviricota;Caudoviricetes	dsDNA	Prokaryote	Duplodnaviria	Heunggongvirae	Uroviricota	Caudoviricetes
SM1000_MG_EukFloat_scaffold_110	SM1000_MG_EukFloat_scaffold_110	MG_eukfloat	yes	37771	No	64	14	2	Medium-quality	Genome-fragment	84.82	AAI-based (medium-confidence)	1		11	0.975	8	43.0738	Viruses;Duplodnaviria;Heunggongvirae;Uroviricota;Caudoviricetes	dsDNA	Prokaryote	Duplodnaviria	Heunggongvirae	Uroviricota	Caudoviricetes
SM1000_MG_EukFloat_scaffold_1101	SM1000_MG_EukFloat_scaffold_1101	MG_eukfloat	yes	10495	No	11	2	0	Low-quality	Genome-fragment	21.85	HMM-based (lower-bound)	1		11	0.9706	2	8.8869	Viruses;Duplodnaviria;Heunggongvirae;Uroviricota;Caudoviricetes	dsDNA	Prokaryote	Duplodnaviria	Heunggongvirae	Uroviricota	Caudoviricetes
SM1000_MG_EukFloat_scaffold_1103	SM1000_MG_EukFloat_scaffold_1103	MG_eukfloat	yes	10493	No	15	1	0	Low-quality	Genome-fragment	4.7	HMM-based (lower-bound)	1		11	0.9422	0	1.713	Viruses;Duplodnaviria;Heunggongvirae;Uroviricota;Caudoviricetes	dsDNA	Prokaryote	Duplodnaviria	Heunggongvirae	Uroviricota	Caudoviricetes
SM1000_MG_EukFloat_scaffold_111	SM1000_MG_EukFloat_scaffold_111	MG_eukfloat	yes	37599	No	55	14	0	Low-quality	Genome-fragment	46.58	HMM-based (lower-bound)	1		11	0.976	9	33.6652	Viruses;Duplodnaviria;Heunggongvirae;Uroviricota;Caudoviricetes	dsDNA	Prokaryote	Duplodnaviria	Heunggongvirae	Uroviricota	Caudoviricetes
SM1000_MG_EukFloat_scaffold_1114	SM1000_MG_EukFloat_scaffold_1114	MG_eukfloat	yes	10463	No	23	4	0	Low-quality	Genome-fragment	15.98	HMM-based (lower-bound)	1		11	0.9334	1	6.8576	Viruses;Duplodnaviria;Heunggongvirae;Uroviricota;Caudoviricetes	dsDNA	Prokaryote	Duplodnaviria	Heunggongvirae	Uroviricota	Caudoviricetes
SM1000_MG_EukFloat_scaffold_1122	SM1000_MG_EukFloat_scaffold_1122	MG_eukfloat	yes	10438	No	25	1	0	Low-quality	Genome-fragment	2.99	HMM-based (lower-bound)	1		11	0.8219	0	0.5258	Viruses;Duplodnaviria;Heunggongvirae;Uroviricota;Caudoviricetes	dsDNA	Prokaryote	Duplodnaviria	Heunggongvirae	Uroviricota	Caudoviricetes
SM1000_MG_EukFloat_scaffold_113	SM1000_MG_EukFloat_scaffold_113	MG_eukfloat	yes	37444	No	68	16	0	Medium-quality	Genome-fragment	58.22	HMM-based (lower-bound)	1		11	0.9814	5	45.198	Viruses;Duplodnaviria;Heunggongvirae;Uroviricota;Caudoviricetes	dsDNA	Prokaryote	Duplodnaviria	Heunggongvirae	Uroviricota	Caudoviricetes
SM1000_MG_EukFloat_scaffold_1133	SM1000_MG_EukFloat_scaffold_1133	MG_eukfloat	yes	10389	No	16	2	0	Low-quality	Genome-fragment	9.65	HMM-based (lower-bound)	1		11	0.9485	1	2.8529	Viruses;Duplodnaviria;Heunggongvirae;Uroviricota;Caudoviricetes	dsDNA	Prokaryote	Duplodnaviria	Heunggongvirae	Uroviricota	Caudoviricetes
SM1000_MG_EukFloat_scaffold_114	SM1000_MG_EukFloat_scaffold_114	MG_eukfloat	yes	36937	No	52	6	1	Low-quality	Genome-fragment	45.97	HMM-based (lower-bound)	1		11	0.9528	4	17.1591	Viruses;Duplodnaviria;Heunggongvirae;Uroviricota;Caudoviricetes	dsDNA	Prokaryote	Duplodnaviria	Heunggongvirae	Uroviricota	Caudoviricetes
SM1000_MG_EukFloat_scaffold_1142	SM1000_MG_EukFloat_scaffold_1142	MG_eukfloat	yes	10340	No	26	1	1	Low-quality	Genome-fragment	15.96	HMM-based (lower-bound)	1		11	0.9507	0	4.2835	Viruses;Duplodnaviria;Heunggongvirae;Uroviricota;Caudoviricetes	dsDNA	Prokaryote	Duplodnaviria	Heunggongvirae	Uroviricota	Caudoviricetes
SM1000_MG_EukFloat_scaffold_1143	SM1000_MG_EukFloat_scaffold_1143	MG_eukfloat	yes	10337	No	22	4	0	Low-quality	Genome-fragment	20.27	AAI-based (medium-confidence)	1		11	0.9809	1	11.2262	Viruses;Duplodnaviria;Heunggongvirae;Uroviricota;Caudoviricetes	dsDNA	Prokaryote	Duplodnaviria	Heunggongvirae	Uroviricota	Caudoviricetes
SM1000_MG_EukFloat_scaffold_1152	SM1000_MG_EukFloat_scaffold_1152	MG_eukfloat	yes	10298	No	22	3	0	Low-quality	Genome-fragment	18.36	AAI-based (high-confidence)	1		11	0.904	1	9.5996	Viruses;Duplodnaviria;Heunggongvirae;Uroviricota;Caudoviricetes	dsDNA	Prokaryote	Duplodnaviria	Heunggongvirae	Uroviricota	Caudoviricetes
SM1000_MG_EukFloat_scaffold_1155	SM1000_MG_EukFloat_scaffold_1155	MG_eukfloat	yes	10294	No	8	6	0	Low-quality	Genome-fragment	23.24	AAI-based (medium-confidence)	1		11	0.9753	7	12.4879	Viruses;Duplodnaviria;Heunggongvirae;Uroviricota;Caudoviricetes	dsDNA	Prokaryote	Duplodnaviria	Heunggongvirae	Uroviricota	Caudoviricetes
SM1000_MG_EukFloat_scaffold_116	SM1000_MG_EukFloat_scaffold_116	MG_eukfloat	yes	36859	No	55	10	0	Medium-quality	Genome-fragment	82.42	AAI-based (high-confidence)	1		11	0.9778	6	33.3822	Viruses;Duplodnaviria;Heunggongvirae;Uroviricota;Caudoviricetes	dsDNA	Prokaryote	Duplodnaviria	Heunggongvirae	Uroviricota	Caudoviricetes
SM1000_MG_EukFloat_scaffold_1160	SM1000_MG_EukFloat_scaffold_1160	MG_eukfloat	yes	10270	No	10	4	0	Low-quality	Genome-fragment	16.08	AAI-based (high-confidence)	1		11	0.9813	1	10.3325	Viruses;Duplodnaviria;Heunggongvirae;Uroviricota;Caudoviricetes;Crassvirales	dsDNA	Prokaryote	Duplodnaviria	Heunggongvirae	Uroviricota	Caudoviricetes	Crassvirales
SM1000_MG_EukFloat_scaffold_117	SM1000_MG_EukFloat_scaffold_117	MG_eukfloat	yes	36690	No	55	6	1	Medium-quality	Genome-fragment	69.22	AAI-based (medium-confidence)	1		11	0.978	5	34.0796	Viruses;Duplodnaviria;Heunggongvirae;Uroviricota;Caudoviricetes	dsDNA	Prokaryote	Duplodnaviria	Heunggongvirae	Uroviricota	Caudoviricetes
SM1000_MG_EukFloat_scaffold_1172	SM1000_MG_EukFloat_scaffold_1172	MG_eukfloat	yes	10190	No	19	1	0	Low-quality	Genome-fragment	21.27	AAI-based (medium-confidence)	1		11	0.9621	2	6.2668	Viruses;Duplodnaviria;Heunggongvirae;Uroviricota;Caudoviricetes	dsDNA	Prokaryote	Duplodnaviria	Heunggongvirae	Uroviricota	Caudoviricetes
SM1000_MG_EukFloat_scaffold_1179	SM1000_MG_EukFloat_scaffold_1179	MG_eukfloat	yes	10149	No	28	3	0	Low-quality	Genome-fragment	5.44	HMM-based (lower-bound)	1		11	0.833	0	4.9078	Viruses;Duplodnaviria;Heunggongvirae;Uroviricota;Caudoviricetes	dsDNA	Prokaryote	Duplodnaviria	Heunggongvirae	Uroviricota	Caudoviricetes
SM1000_MG_EukFloat_scaffold_118	SM1000_MG_EukFloat_scaffold_118	MG_eukfloat	yes	36449	No	40	3	0	Complete	High-quality	100	DTR (high-confidence)	1		11	0.9594	2	9.4673	Viruses;Duplodnaviria;Heunggongvirae;Uroviricota;Caudoviricetes	dsDNA	Prokaryote	Duplodnaviria	Heunggongvirae	Uroviricota	Caudoviricetes
SM1000_MG_EukFloat_scaffold_1182	SM1000_MG_EukFloat_scaffold_1182	MG_eukfloat	yes	10114	No	11	3	0	Low-quality	Genome-fragment	21.93	AAI-based (medium-confidence)	1		11	0.9751	1	11.5701	Viruses;Duplodnaviria;Heunggongvirae;Uroviricota;Caudoviricetes	dsDNA	Prokaryote	Duplodnaviria	Heunggongvirae	Uroviricota	Caudoviricetes
SM1000_MG_EukFloat_scaffold_12	SM1000_MG_EukFloat_scaffold_12	MG_eukfloat	yes	76208	No	121	19	2	High-quality	High-quality	100	AAI-based (medium-confidence)	1		11	0.9661	11	52.9505	Viruses;Duplodnaviria;Heunggongvirae;Uroviricota;Caudoviricetes	dsDNA	Prokaryote	Duplodnaviria	Heunggongvirae	Uroviricota	Caudoviricetes
SM1000_MG_EukFloat_scaffold_120	SM1000_MG_EukFloat_scaffold_120	MG_eukfloat	yes	36218	No	49	3	0	Medium-quality	Genome-fragment	52.41	HMM-based (lower-bound)	1		11	0.9713	3	14.6033	Viruses;Duplodnaviria;Heunggongvirae;Uroviricota;Caudoviricetes	dsDNA	Prokaryote	Duplodnaviria	Heunggongvirae	Uroviricota	Caudoviricetes
SM1000_MG_EukFloat_scaffold_121	SM1000_MG_EukFloat_scaffold_121	MG_eukfloat	yes	35904	No	68	13	1	High-quality	High-quality	100	AAI-based (high-confidence)	1		11	0.9504	10	40.3151	Viruses;Duplodnaviria;Heunggongvirae;Uroviricota;Caudoviricetes	dsDNA	Prokaryote	Duplodnaviria	Heunggongvirae	Uroviricota	Caudoviricetes
SM1000_MG_EukFloat_scaffold_122	SM1000_MG_EukFloat_scaffold_122	MG_eukfloat	yes	35674	No	52	11	0	Low-quality	Genome-fragment	34.52	HMM-based (lower-bound)	1		11	0.9763	5	34.3948	Viruses;Duplodnaviria;Heunggongvirae;Uroviricota;Caudoviricetes	dsDNA	Prokaryote	Duplodnaviria	Heunggongvirae	Uroviricota	Caudoviricetes
SM1000_MG_EukFloat_scaffold_123	SM1000_MG_EukFloat_scaffold_123,SM1001_MG_EukFloat_scaffold_7060	MG_eukfloat	yes	35368	No	61	10	1	Medium-quality	Genome-fragment	75.48	AAI-based (medium-confidence)	1		11	0.9521	5	20.6006	Viruses;Duplodnaviria;Heunggongvirae;Uroviricota;Caudoviricetes	dsDNA	Prokaryote	Duplodnaviria	Heunggongvirae	Uroviricota	Caudoviricetes
SM1000_MG_EukFloat_scaffold_124	SM1000_MG_EukFloat_scaffold_124	MG_eukfloat	yes	35155	No	58	16	0	Medium-quality	Genome-fragment	60.9	HMM-based (lower-bound)	1		11	0.9789	9	33.8367	Viruses;Duplodnaviria;Heunggongvirae;Uroviricota;Caudoviricetes	dsDNA	Prokaryote	Duplodnaviria	Heunggongvirae	Uroviricota	Caudoviricetes
SM1000_MG_EukFloat_scaffold_125	SM1000_MG_EukFloat_scaffold_125	MG_eukfloat	yes	35085	No	52	14	2	Medium-quality	Genome-fragment	53	HMM-based (lower-bound)	1		11	0.9775	9	33.7462	Viruses;Duplodnaviria;Heunggongvirae;Uroviricota;Caudoviricetes	dsDNA	Prokaryote	Duplodnaviria	Heunggongvirae	Uroviricota	Caudoviricetes
SM1000_MG_EukFloat_scaffold_127	SM1000_MG_EukFloat_scaffold_127	MG_eukfloat	yes	34680	No	59	8	0	Medium-quality	Genome-fragment	86.09	AAI-based (medium-confidence)	1		11	0.9731	2	28.2863	Viruses;Duplodnaviria;Heunggongvirae;Uroviricota;Caudoviricetes	dsDNA	Prokaryote	Duplodnaviria	Heunggongvirae	Uroviricota	Caudoviricetes
SM1000_MG_EukFloat_scaffold_129	SM1000_MG_EukFloat_scaffold_129	MG_eukfloat	yes	34293	No	46	4	0	Medium-quality	Genome-fragment	57.03	AAI-based (medium-confidence)	1		11	0.9642	5	22.2878	Viruses;Duplodnaviria;Heunggongvirae;Uroviricota;Caudoviricetes	dsDNA	Prokaryote	Duplodnaviria	Heunggongvirae	Uroviricota	Caudoviricetes
SM1000_MG_EukFloat_scaffold_13	SM1000_MG_EukFloat_scaffold_13	MG_eukfloat	yes	75507	No	128	24	1	High-quality	High-quality	100	AAI-based (high-confidence)	1		11	0.9692	12	55.0428	Viruses;Duplodnaviria;Heunggongvirae;Uroviricota;Caudoviricetes	dsDNA	Prokaryote	Duplodnaviria	Heunggongvirae	Uroviricota	Caudoviricetes
SM1000_MG_EukFloat_scaffold_130	SM1000_MG_EukFloat_scaffold_130	MG_eukfloat	yes	33983	No	46	17	0	Medium-quality	Genome-fragment	51.43	AAI-based (medium-confidence)	1		11	0.9629	4	31.3271	Viruses;Duplodnaviria;Heunggongvirae;Uroviricota;Caudoviricetes	dsDNA	Prokaryote	Duplodnaviria	Heunggongvirae	Uroviricota	Caudoviricetes
SM1000_MG_EukFloat_scaffold_14	SM1000_MG_EukFloat_scaffold_14	MG_eukfloat	yes	71329	No	118	14	0	Complete	High-quality	100	DTR (high-confidence)	1.01		11	0.9531	7	40.896	Viruses;Duplodnaviria;Heunggongvirae;Uroviricota;Caudoviricetes	dsDNA	Prokaryote	Duplodnaviria	Heunggongvirae	Uroviricota	Caudoviricetes
SM1000_MG_EukFloat_scaffold_140	SM1000_MG_EukFloat_scaffold_140	MG_eukfloat	yes	32085	No	48	10	2	Low-quality	Genome-fragment	49.63	AAI-based (medium-confidence)	1		11	0.9339	2	18.9775	Viruses;Duplodnaviria;Heunggongvirae;Uroviricota;Caudoviricetes	dsDNA	Prokaryote	Duplodnaviria	Heunggongvirae	Uroviricota	Caudoviricetes
SM1000_MG_EukFloat_scaffold_143	SM1000_MG_EukFloat_scaffold_143	MG_eukfloat	yes	31269	No	59	9	0	Low-quality	Genome-fragment	46.34	HMM-based (lower-bound)	1		11	0.9693	3	25.6907	Viruses;Duplodnaviria;Heunggongvirae;Uroviricota;Caudoviricetes	dsDNA	Prokaryote	Duplodnaviria	Heunggongvirae	Uroviricota	Caudoviricetes
SM1000_MG_EukFloat_scaffold_145	SM1000_MG_EukFloat_scaffold_145,SM1027_MG_EukFloat_scaffold_4807	MG_eukfloat	yes	31038	No	63	11	1	Low-quality	Genome-fragment	37.09	HMM-based (lower-bound)	1		11	0.9329	2	18.9611	Viruses;Duplodnaviria;Heunggongvirae;Uroviricota;Caudoviricetes	dsDNA	Prokaryote	Duplodnaviria	Heunggongvirae	Uroviricota	Caudoviricetes
SM1000_MG_EukFloat_scaffold_146|provirus_4079_31015	SM1000_MG_EukFloat_scaffold_146|provirus_4079_31015	MG_eukfloat	yes	26937	Yes	31	10	2	Low-quality	Genome-fragment	39.27	AAI-based (medium-confidence)	1	4079-31015	11	0.9296	6	21.0064	Viruses;Duplodnaviria;Heunggongvirae;Uroviricota;Caudoviricetes	dsDNA	Prokaryote	Duplodnaviria	Heunggongvirae	Uroviricota	Caudoviricetes
SM1000_MG_EukFloat_scaffold_147	SM1000_MG_EukFloat_scaffold_147	MG_eukfloat	yes	30639	No	35	21	1	Medium-quality	Genome-fragment	59.22	AAI-based (medium-confidence)	1		11	0.9765	10	43.8799	Viruses;Duplodnaviria;Heunggongvirae;Uroviricota;Caudoviricetes	dsDNA	Prokaryote	Duplodnaviria	Heunggongvirae	Uroviricota	Caudoviricetes
SM1000_MG_EukFloat_scaffold_149	SM1000_MG_EukFloat_scaffold_149	MG_eukfloat	yes	30533	No	45	9	1	Medium-quality	Genome-fragment	64.48	AAI-based (medium-confidence)	1		11	0.969	4	26.9683	Viruses;Duplodnaviria;Heunggongvirae;Uroviricota;Caudoviricetes	dsDNA	Prokaryote	Duplodnaviria	Heunggongvirae	Uroviricota	Caudoviricetes
SM1000_MG_EukFloat_scaffold_15	SM1000_MG_EukFloat_scaffold_15,SM1050_MG_EukFloat_scaffold_12581,SM1050_MG_EukFloat_scaffold_13055	MG_eukfloat	yes	71235	No	101	13	1	High-quality	High-quality	100	AAI-based (medium-confidence)	1		11	0.9765	3	48.3861	Viruses;Duplodnaviria;Heunggongvirae;Uroviricota;Caudoviricetes	dsDNA	Prokaryote	Duplodnaviria	Heunggongvirae	Uroviricota	Caudoviricetes
SM1000_MG_EukFloat_scaffold_151	SM1000_MG_EukFloat_scaffold_151	MG_eukfloat	yes	30444	No	53	6	0	Low-quality	Genome-fragment	43.63	HMM-based (lower-bound)	1		11	0.9728	2	28.2395	Viruses;Duplodnaviria;Heunggongvirae;Uroviricota;Caudoviricetes	dsDNA	Prokaryote	Duplodnaviria	Heunggongvirae	Uroviricota	Caudoviricetes
SM1000_MG_EukFloat_scaffold_152	SM1000_MG_EukFloat_scaffold_152	MG_eukfloat	yes	30167	No	52	4	0	Low-quality	Genome-fragment	28.7	HMM-based (lower-bound)	1		11	0.9786	2	18.6833	Viruses;Duplodnaviria;Heunggongvirae;Uroviricota;Caudoviricetes	dsDNA	Prokaryote	Duplodnaviria	Heunggongvirae	Uroviricota	Caudoviricetes
SM1000_MG_EukFloat_scaffold_153	SM1000_MG_EukFloat_scaffold_153	MG_eukfloat	yes	30094	No	48	8	2	Low-quality	Genome-fragment	36.58	AAI-based (medium-confidence)	1		11	0.9659	0	14.3885	Viruses;Duplodnaviria;Heunggongvirae;Uroviricota;Caudoviricetes	dsDNA	Prokaryote	Duplodnaviria	Heunggongvirae	Uroviricota	Caudoviricetes
SM1000_MG_EukFloat_scaffold_155	SM1000_MG_EukFloat_scaffold_155	MG_eukfloat	yes	30017	No	60	7	1	Low-quality	Genome-fragment	31.88	AAI-based (medium-confidence)	1		11	0.9338	2	20.0379	Viruses;Duplodnaviria;Heunggongvirae;Uroviricota;Caudoviricetes	dsDNA	Prokaryote	Duplodnaviria	Heunggongvirae	Uroviricota	Caudoviricetes
SM1000_MG_EukFloat_scaffold_156	SM1000_MG_EukFloat_scaffold_156	MG_eukfloat	yes	29977	No	35	10	0	Medium-quality	Genome-fragment	82.17	AAI-based (medium-confidence)	1		11	0.9811	9	33.5758	Viruses;Duplodnaviria;Heunggongvirae;Uroviricota;Caudoviricetes	dsDNA	Prokaryote	Duplodnaviria	Heunggongvirae	Uroviricota	Caudoviricetes
SM1000_MG_EukFloat_scaffold_157	SM1000_MG_EukFloat_scaffold_157	MG_eukfloat	yes	29828	No	50	7	0	Low-quality	Genome-fragment	44.98	AAI-based (medium-confidence)	1		11	0.9786	4	24.2851	Viruses;Duplodnaviria;Heunggongvirae;Uroviricota;Caudoviricetes	dsDNA	Prokaryote	Duplodnaviria	Heunggongvirae	Uroviricota	Caudoviricetes
SM1000_MG_EukFloat_scaffold_158	SM1000_MG_EukFloat_scaffold_158	MG_eukfloat	yes	29746	No	46	6	0	Medium-quality	Genome-fragment	63.28	AAI-based (medium-confidence)	1		11	0.9634	4	13.0816	Viruses;Duplodnaviria;Heunggongvirae;Uroviricota;Caudoviricetes	dsDNA	Prokaryote	Duplodnaviria	Heunggongvirae	Uroviricota	Caudoviricetes
SM1000_MG_EukFloat_scaffold_159	SM1000_MG_EukFloat_scaffold_159	MG_eukfloat	yes	29664	No	47	11	1	Medium-quality	Genome-fragment	73.47	AAI-based (medium-confidence)	1		11	0.9382	7	22.1446	Viruses;Duplodnaviria;Heunggongvirae;Uroviricota;Caudoviricetes	dsDNA	Prokaryote	Duplodnaviria	Heunggongvirae	Uroviricota	Caudoviricetes
SM1000_MG_EukFloat_scaffold_16	SM1000_MG_EukFloat_scaffold_16	MG_eukfloat	yes	71098	No	120	27	1	Medium-quality	Genome-fragment	87.12	HMM-based (lower-bound)	1		11	0.9772	11	70.2188	Viruses;Duplodnaviria;Heunggongvirae;Uroviricota;Caudoviricetes	dsDNA	Prokaryote	Duplodnaviria	Heunggongvirae	Uroviricota	Caudoviricetes
SM1000_MG_EukFloat_scaffold_162	SM1000_MG_EukFloat_scaffold_162	MG_eukfloat	yes	28762	No	49	16	1	Medium-quality	Genome-fragment	68.94	AAI-based (high-confidence)	1		11	0.9775	4	38.1768	Viruses;Duplodnaviria;Heunggongvirae;Uroviricota;Caudoviricetes	dsDNA	Prokaryote	Duplodnaviria	Heunggongvirae	Uroviricota	Caudoviricetes
SM1000_MG_EukFloat_scaffold_167	SM1000_MG_EukFloat_scaffold_167	MG_eukfloat	yes	28057	No	39	4	0	Low-quality	Genome-fragment	32.81	AAI-based (medium-confidence)	1		11	0.9705	1	13.8585	Viruses;Duplodnaviria;Heunggongvirae;Uroviricota;Caudoviricetes	dsDNA	Prokaryote	Duplodnaviria	Heunggongvirae	Uroviricota	Caudoviricetes
SM1000_MG_EukFloat_scaffold_17	SM1000_MG_EukFloat_scaffold_17	MG_eukfloat	yes	70366	No	112	11	2	Medium-quality	Genome-fragment	88.02	HMM-based (lower-bound)	1		11	0.9614	2	23.698	Viruses;Duplodnaviria;Heunggongvirae;Uroviricota;Caudoviricetes	dsDNA	Prokaryote	Duplodnaviria	Heunggongvirae	Uroviricota	Caudoviricetes
SM1000_MG_EukFloat_scaffold_175	SM1000_MG_EukFloat_scaffold_175	MG_eukfloat	yes	26991	No	50	6	0	Medium-quality	Genome-fragment	69.13	AAI-based (medium-confidence)	1		11	0.9571	2	27.0159	Viruses;Duplodnaviria;Heunggongvirae;Uroviricota;Caudoviricetes	dsDNA	Prokaryote	Duplodnaviria	Heunggongvirae	Uroviricota	Caudoviricetes
SM1000_MG_EukFloat_scaffold_176	SM1000_MG_EukFloat_scaffold_176	MG_eukfloat	yes	26733	No	56	14	1	Medium-quality	Genome-fragment	62.77	AAI-based (medium-confidence)	1		11	0.953	7	38.1838	Viruses;Duplodnaviria;Heunggongvirae;Uroviricota;Caudoviricetes	dsDNA	Prokaryote	Duplodnaviria	Heunggongvirae	Uroviricota	Caudoviricetes
SM1000_MG_EukFloat_scaffold_177	SM1000_MG_EukFloat_scaffold_177	MG_eukfloat	yes	26611	No	24	3	0	Low-quality	Genome-fragment	23.3	HMM-based (lower-bound)	1		11	0.9809	2	18.2397	Viruses;Duplodnaviria;Heunggongvirae;Uroviricota;Caudoviricetes	dsDNA	Prokaryote	Duplodnaviria	Heunggongvirae	Uroviricota	Caudoviricetes
SM1000_MG_EukFloat_scaffold_178	SM1000_MG_EukFloat_scaffold_178	MG_eukfloat	yes	26441	No	29	3	1	Medium-quality	Genome-fragment	70.21	AAI-based (medium-confidence)	1		11	0.9684	3	10.5378	Viruses;Duplodnaviria;Heunggongvirae;Uroviricota;Caudoviricetes	dsDNA	Prokaryote	Duplodnaviria	Heunggongvirae	Uroviricota	Caudoviricetes
SM1000_MG_EukFloat_scaffold_179	SM1000_MG_EukFloat_scaffold_179	MG_eukfloat	yes	26419	No	44	10	0	Medium-quality	Genome-fragment	55.52	AAI-based (medium-confidence)	1		11	0.9783	6	18.4264	Viruses;Duplodnaviria;Heunggongvirae;Uroviricota;Caudoviricetes	dsDNA	Prokaryote	Duplodnaviria	Heunggongvirae	Uroviricota	Caudoviricetes
SM1000_MG_EukFloat_scaffold_18	SM1000_MG_EukFloat_scaffold_18	MG_eukfloat	yes	70165	No	104	6	2	Complete	High-quality	100	DTR (high-confidence)	1		11	0.9623	4	30.9354	Viruses;Duplodnaviria;Heunggongvirae;Uroviricota;Caudoviricetes	dsDNA	Prokaryote	Duplodnaviria	Heunggongvirae	Uroviricota	Caudoviricetes
SM1000_MG_EukFloat_scaffold_180	SM1000_MG_EukFloat_scaffold_180	MG_eukfloat	yes	26305	No	40	4	2	Medium-quality	Genome-fragment	52.4	AAI-based (high-confidence)	1		11	0.9739	3	10.8832	Viruses;Duplodnaviria;Heunggongvirae;Uroviricota;Caudoviricetes	dsDNA	Prokaryote	Duplodnaviria	Heunggongvirae	Uroviricota	Caudoviricetes
SM1000_MG_EukFloat_scaffold_181	SM1000_MG_EukFloat_scaffold_181	MG_eukfloat	yes	26213	No	35	10	0	Medium-quality	Genome-fragment	65.44	AAI-based (medium-confidence)	1		11	0.9735	6	26.0731	Viruses;Duplodnaviria;Heunggongvirae;Uroviricota;Caudoviricetes	dsDNA	Prokaryote	Duplodnaviria	Heunggongvirae	Uroviricota	Caudoviricetes
SM1000_MG_EukFloat_scaffold_184	SM1000_MG_EukFloat_scaffold_184	MG_eukfloat	yes	26088	No	29	4	0	Medium-quality	Genome-fragment	54.07	AAI-based (medium-confidence)	1		11	0.9693	3	16.1176	Viruses;Duplodnaviria;Heunggongvirae;Uroviricota;Caudoviricetes	dsDNA	Prokaryote	Duplodnaviria	Heunggongvirae	Uroviricota	Caudoviricetes
SM1000_MG_EukFloat_scaffold_185	SM1000_MG_EukFloat_scaffold_185	MG_eukfloat	yes	25988	No	42	11	0	Low-quality	Genome-fragment	41.88	AAI-based (medium-confidence)	1		11	0.961	6	25.831	Viruses;Duplodnaviria;Heunggongvirae;Uroviricota;Caudoviricetes	dsDNA	Prokaryote	Duplodnaviria	Heunggongvirae	Uroviricota	Caudoviricetes
SM1000_MG_EukFloat_scaffold_186	SM1000_MG_EukFloat_scaffold_186	MG_eukfloat	yes	25914	No	37	6	0	Low-quality	Genome-fragment	15.96	AAI-based (medium-confidence)	1		11	0.9351	3	16.7988	Viruses;Duplodnaviria;Heunggongvirae;Uroviricota;Caudoviricetes	dsDNA	Prokaryote	Duplodnaviria	Heunggongvirae	Uroviricota	Caudoviricetes
SM1000_MG_EukFloat_scaffold_190	SM1000_MG_EukFloat_scaffold_190	MG_eukfloat	yes	25442	No	47	10	1	Medium-quality	Genome-fragment	66.15	AAI-based (high-confidence)	1		11	0.9803	5	42.9509	Viruses;Duplodnaviria;Heunggongvirae;Uroviricota;Caudoviricetes	dsDNA	Prokaryote	Duplodnaviria	Heunggongvirae	Uroviricota	Caudoviricetes
SM1000_MG_EukFloat_scaffold_196_1|8468-24785/24785	SM1000_MG_EukFloat_scaffold_196_1|8468-24785/24785	MG_eukfloat	yes	16318	Yes	24	5	0	Low-quality	Genome-fragment	35.43	AAI-based (medium-confidence)	1	8468-24785	11	0.9506	3	15.6962	Viruses;Duplodnaviria;Heunggongvirae;Uroviricota;Caudoviricetes	dsDNA	Prokaryote	Duplodnaviria	Heunggongvirae	Uroviricota	Caudoviricetes
SM1000_MG_EukFloat_scaffold_199	SM1000_MG_EukFloat_scaffold_199	MG_eukfloat	yes	24627	No	33	12	0	Low-quality	Genome-fragment	41.89	AAI-based (high-confidence)	1		11	0.9746	4	25.9668	Viruses;Duplodnaviria;Heunggongvirae;Uroviricota;Caudoviricetes	dsDNA	Prokaryote	Duplodnaviria	Heunggongvirae	Uroviricota	Caudoviricetes
SM1000_MG_EukFloat_scaffold_20	SM1000_MG_EukFloat_scaffold_20	MG_eukfloat	yes	70058	No	105	17	2	High-quality	High-quality	100	AAI-based (medium-confidence)	1		11	0.9759	5	46.3053	Viruses;Duplodnaviria;Heunggongvirae;Uroviricota;Caudoviricetes	dsDNA	Prokaryote	Duplodnaviria	Heunggongvirae	Uroviricota	Caudoviricetes
SM1000_MG_EukFloat_scaffold_202	SM1000_MG_EukFloat_scaffold_202	MG_eukfloat	yes	24259	No	32	8	4	Low-quality	Genome-fragment	25.76	AAI-based (high-confidence)	1		11	0.9146	2	23.0921	Viruses;Duplodnaviria;Heunggongvirae;Uroviricota;Caudoviricetes	dsDNA	Prokaryote	Duplodnaviria	Heunggongvirae	Uroviricota	Caudoviricetes
SM1000_MG_EukFloat_scaffold_206	SM1000_MG_EukFloat_scaffold_206	MG_eukfloat	yes	23972	No	37	10	0	Low-quality	Genome-fragment	48.06	AAI-based (medium-confidence)	1		11	0.9685	9	32.1805	Viruses;Duplodnaviria;Heunggongvirae;Uroviricota;Caudoviricetes	dsDNA	Prokaryote	Duplodnaviria	Heunggongvirae	Uroviricota	Caudoviricetes
SM1000_MG_EukFloat_scaffold_208	SM1000_MG_EukFloat_scaffold_208,SM1026_MG_EukFloat_scaffold_2661	MG_eukfloat	yes	23939	No	30	5	0	Medium-quality	Genome-fragment	50.12	AAI-based (medium-confidence)	1		11	0.9764	6	25.1208	Viruses;Duplodnaviria;Heunggongvirae;Uroviricota;Caudoviricetes	dsDNA	Prokaryote	Duplodnaviria	Heunggongvirae	Uroviricota	Caudoviricetes
SM1000_MG_EukFloat_scaffold_21	SM1000_MG_EukFloat_scaffold_21	MG_eukfloat	yes	68759	No	112	10	0	Complete	High-quality	100	DTR (high-confidence)	1		11	0.9683	4	28.6872	Viruses;Duplodnaviria;Heunggongvirae;Uroviricota;Caudoviricetes	dsDNA	Prokaryote	Duplodnaviria	Heunggongvirae	Uroviricota	Caudoviricetes
SM1000_MG_EukFloat_scaffold_210	SM1000_MG_EukFloat_scaffold_210	MG_eukfloat	yes	23813	No	44	1	1	Low-quality	Genome-fragment	45.34	HMM-based (lower-bound)	1		11	0.9669	0	5.1548	Viruses;Duplodnaviria;Heunggongvirae;Uroviricota;Caudoviricetes	dsDNA	Prokaryote	Duplodnaviria	Heunggongvirae	Uroviricota	Caudoviricetes
SM1000_MG_EukFloat_scaffold_213	SM1000_MG_EukFloat_scaffold_213	MG_eukfloat	yes	23639	No	39	4	0	Medium-quality	Genome-fragment	54.1	AAI-based (high-confidence)	1		11	0.8385	0	5.3102	Viruses;Duplodnaviria;Heunggongvirae;Uroviricota;Caudoviricetes	dsDNA	Prokaryote	Duplodnaviria	Heunggongvirae	Uroviricota	Caudoviricetes
SM1000_MG_EukFloat_scaffold_218	SM1000_MG_EukFloat_scaffold_218	MG_eukfloat	yes	23430	No	53	2	2	Low-quality	Genome-fragment	11.44	HMM-based (lower-bound)	1		11	0.9619	2	10.3036	Viruses;Duplodnaviria;Heunggongvirae;Uroviricota;Caudoviricetes	dsDNA	Prokaryote	Duplodnaviria	Heunggongvirae	Uroviricota	Caudoviricetes
SM1000_MG_EukFloat_scaffold_22	SM1000_MG_EukFloat_scaffold_22	MG_eukfloat	yes	68552	No	105	16	4	Complete	High-quality	100	DTR (high-confidence)	1		11	0.9016	9	53.4958	Viruses;Duplodnaviria;Heunggongvirae;Uroviricota;Caudoviricetes	dsDNA	Prokaryote	Duplodnaviria	Heunggongvirae	Uroviricota	Caudoviricetes
SM1000_MG_EukFloat_scaffold_221	SM1000_MG_EukFloat_scaffold_221	MG_eukfloat	yes	23128	No	27	6	0	Medium-quality	Genome-fragment	51.28	AAI-based (medium-confidence)	1		11	0.9749	3	9.9156	Viruses;Duplodnaviria;Heunggongvirae;Uroviricota;Caudoviricetes	dsDNA	Prokaryote	Duplodnaviria	Heunggongvirae	Uroviricota	Caudoviricetes
SM1000_MG_EukFloat_scaffold_222	SM1000_MG_EukFloat_scaffold_222	MG_eukfloat	yes	23080	No	42	3	1	Low-quality	Genome-fragment	45.68	AAI-based (medium-confidence)	1		11	0.9684	2	11.0787	Viruses;Duplodnaviria;Heunggongvirae;Uroviricota;Caudoviricetes	dsDNA	Prokaryote	Duplodnaviria	Heunggongvirae	Uroviricota	Caudoviricetes
SM1000_MG_EukFloat_scaffold_223	SM1000_MG_EukFloat_scaffold_223	MG_eukfloat	yes	23039	No	30	6	0	Medium-quality	Genome-fragment	50.06	AAI-based (high-confidence)	1		11	0.9746	7	21.1539	Viruses;Duplodnaviria;Heunggongvirae;Uroviricota;Caudoviricetes	dsDNA	Prokaryote	Duplodnaviria	Heunggongvirae	Uroviricota	Caudoviricetes
SM1000_MG_EukFloat_scaffold_224	SM1000_MG_EukFloat_scaffold_224	MG_eukfloat	yes	23027	No	55	2	0	Low-quality	Genome-fragment	11.33	HMM-based (lower-bound)	1		11	0.9693	2	19.0232	Viruses;Duplodnaviria;Heunggongvirae;Uroviricota;Caudoviricetes	dsDNA	Prokaryote	Duplodnaviria	Heunggongvirae	Uroviricota	Caudoviricetes
SM1000_MG_EukFloat_scaffold_227	SM1000_MG_EukFloat_scaffold_227	MG_eukfloat	yes	22928	No	40	6	0	Low-quality	Genome-fragment	43.46	AAI-based (medium-confidence)	1		11	0.9636	0	12.5695	Viruses;Duplodnaviria;Heunggongvirae;Uroviricota;Caudoviricetes	dsDNA	Prokaryote	Duplodnaviria	Heunggongvirae	Uroviricota	Caudoviricetes
SM1000_MG_EukFloat_scaffold_228	SM1000_MG_EukFloat_scaffold_228	MG_eukfloat	yes	22876	No	70	2	0	Low-quality	Genome-fragment	14.93	HMM-based (lower-bound)	1		11	0.975	0	11.1812	Viruses;Duplodnaviria;Heunggongvirae;Uroviricota;Caudoviricetes	dsDNA	Prokaryote	Duplodnaviria	Heunggongvirae	Uroviricota	Caudoviricetes
SM1000_MG_EukFloat_scaffold_23	SM1000_MG_EukFloat_scaffold_23	MG_eukfloat	yes	65533	No	107	12	1	Complete	High-quality	100	DTR (high-confidence)	1.01		11	0.9754	6	55.5491	Viruses;Duplodnaviria;Heunggongvirae;Uroviricota;Caudoviricetes	dsDNA	Prokaryote	Duplodnaviria	Heunggongvirae	Uroviricota	Caudoviricetes
SM1000_MG_EukFloat_scaffold_231	SM1000_MG_EukFloat_scaffold_231	MG_eukfloat	yes	22555	No	49	1	0	Low-quality	Genome-fragment	23.31	AAI-based (medium-confidence)	1		11	0.9651	0	8.5736	Viruses;Duplodnaviria;Heunggongvirae;Uroviricota;Caudoviricetes	dsDNA	Prokaryote	Duplodnaviria	Heunggongvirae	Uroviricota	Caudoviricetes
SM1000_MG_EukFloat_scaffold_232	SM1000_MG_EukFloat_scaffold_232	MG_eukfloat	yes	22461	No	30	8	1	Medium-quality	Genome-fragment	60.59	AAI-based (medium-confidence)	1		11	0.9736	4	25.0539	Viruses;Duplodnaviria;Heunggongvirae;Uroviricota;Caudoviricetes	dsDNA	Prokaryote	Duplodnaviria	Heunggongvirae	Uroviricota	Caudoviricetes
SM1000_MG_EukFloat_scaffold_237	SM1000_MG_EukFloat_scaffold_237,SM1050_MG_EukFloat_scaffold_13313	MG_eukfloat	yes	21978	No	34	7	1	Medium-quality	Genome-fragment	56.89	AAI-based (medium-confidence)	1		11	0.976	3	26.0053	Viruses;Duplodnaviria;Heunggongvirae;Uroviricota;Caudoviricetes	dsDNA	Prokaryote	Duplodnaviria	Heunggongvirae	Uroviricota	Caudoviricetes
SM1000_MG_EukFloat_scaffold_24	SM1000_MG_EukFloat_scaffold_24	MG_eukfloat	yes	63914	No	106	14	3	Medium-quality	Genome-fragment	58.78	HMM-based (lower-bound)	1		11	0.9595	7	41.2271	Viruses;Duplodnaviria;Heunggongvirae;Uroviricota;Caudoviricetes	dsDNA	Prokaryote	Duplodnaviria	Heunggongvirae	Uroviricota	Caudoviricetes
SM1000_MG_EukFloat_scaffold_241	SM1000_MG_EukFloat_scaffold_241	MG_eukfloat	yes	21813	No	41	3	0	Low-quality	Genome-fragment	41.16	HMM-based (lower-bound)	1		11	0.9677	1	16.2562	Viruses;Duplodnaviria;Heunggongvirae;Uroviricota;Caudoviricetes	dsDNA	Prokaryote	Duplodnaviria	Heunggongvirae	Uroviricota	Caudoviricetes
SM1000_MG_EukFloat_scaffold_243	SM1000_MG_EukFloat_scaffold_243	MG_eukfloat	yes	21672	No	33	9	2	Low-quality	Genome-fragment	31.05	AAI-based (medium-confidence)	1		11	0.9717	4	19.0439	Viruses;Duplodnaviria;Heunggongvirae;Uroviricota;Caudoviricetes	dsDNA	Prokaryote	Duplodnaviria	Heunggongvirae	Uroviricota	Caudoviricetes
SM1000_MG_EukFloat_scaffold_247	SM1000_MG_EukFloat_scaffold_247	MG_eukfloat	yes	21469	No	30	1	1	Low-quality	Genome-fragment	13.42	AAI-based (medium-confidence)	1		11	0.7636	1	4.5844	Viruses;Duplodnaviria;Heunggongvirae;Uroviricota;Caudoviricetes	dsDNA	Prokaryote	Duplodnaviria	Heunggongvirae	Uroviricota	Caudoviricetes
SM1000_MG_EukFloat_scaffold_249	SM1000_MG_EukFloat_scaffold_249	MG_eukfloat	yes	21389	No	29	4	0	Low-quality	Genome-fragment	44.03	AAI-based (medium-confidence)	1.01		11	0.9789	6	26.0096	Viruses;Duplodnaviria;Heunggongvirae;Uroviricota;Caudoviricetes	dsDNA	Prokaryote	Duplodnaviria	Heunggongvirae	Uroviricota	Caudoviricetes
SM1000_MG_EukFloat_scaffold_25	SM1000_MG_EukFloat_scaffold_25	MG_eukfloat	yes	63302	No	96	25	0	Complete	High-quality	100	DTR (high-confidence)	1		11	0.9766	8	45.0276	Viruses;Duplodnaviria;Heunggongvirae;Uroviricota;Caudoviricetes	dsDNA	Prokaryote	Duplodnaviria	Heunggongvirae	Uroviricota	Caudoviricetes
SM1000_MG_EukFloat_scaffold_250	SM1000_MG_EukFloat_scaffold_250	MG_eukfloat	yes	21365	No	36	2	0	Low-quality	Genome-fragment	23.46	HMM-based (lower-bound)	1		11	0.9076	1	7.0024	Viruses;Duplodnaviria;Heunggongvirae;Uroviricota;Caudoviricetes	dsDNA	Prokaryote	Duplodnaviria	Heunggongvirae	Uroviricota	Caudoviricetes
SM1000_MG_EukFloat_scaffold_254	SM1000_MG_EukFloat_scaffold_254	MG_eukfloat	yes	21099	No	30	7	0	Low-quality	Genome-fragment	45.52	AAI-based (medium-confidence)	1		11	0.9813	7	26.6067	Viruses;Duplodnaviria;Heunggongvirae;Uroviricota;Caudoviricetes	dsDNA	Prokaryote	Duplodnaviria	Heunggongvirae	Uroviricota	Caudoviricetes
SM1000_MG_EukFloat_scaffold_257	SM1000_MG_EukFloat_scaffold_257	MG_eukfloat	yes	20965	No	29	12	0	Medium-quality	Genome-fragment	52.07	AAI-based (medium-confidence)	1		11	0.98	12	32.3546	Viruses;Duplodnaviria;Heunggongvirae;Uroviricota;Caudoviricetes	dsDNA	Prokaryote	Duplodnaviria	Heunggongvirae	Uroviricota	Caudoviricetes
SM1000_MG_EukFloat_scaffold_26	SM1000_MG_EukFloat_scaffold_26	MG_eukfloat	yes	62829	No	119	10	0	Medium-quality	Genome-fragment	87.14	HMM-based (lower-bound)	1		11	0.9652	7	39.8754	Viruses;Duplodnaviria;Heunggongvirae;Uroviricota;Caudoviricetes	dsDNA	Prokaryote	Duplodnaviria	Heunggongvirae	Uroviricota	Caudoviricetes
SM1000_MG_EukFloat_scaffold_260	SM1000_MG_EukFloat_scaffold_260	MG_eukfloat	yes	20828	No	44	4	0	Low-quality	Genome-fragment	12.91	HMM-based (lower-bound)	1.01		11	0.9304	3	16.3167	Viruses;Duplodnaviria;Heunggongvirae;Uroviricota;Caudoviricetes	dsDNA	Prokaryote	Duplodnaviria	Heunggongvirae	Uroviricota	Caudoviricetes
SM1000_MG_EukFloat_scaffold_261	SM1000_MG_EukFloat_scaffold_261	MG_eukfloat	yes	20806	No	16	2	0	Low-quality	Genome-fragment	12.59	HMM-based (lower-bound)	1		11	0.9813	0	19.0226	Viruses;Duplodnaviria;Heunggongvirae;Uroviricota;Caudoviricetes	dsDNA	Prokaryote	Duplodnaviria	Heunggongvirae	Uroviricota	Caudoviricetes
SM1000_MG_EukFloat_scaffold_262	SM1000_MG_EukFloat_scaffold_262,SM1002_MG_EukFloat_scaffold_3139	MG_eukfloat	yes	20787	No	27	7	0	Low-quality	Genome-fragment	43.31	AAI-based (medium-confidence)	1		11	0.9774	6	23.758	Viruses;Duplodnaviria;Heunggongvirae;Uroviricota;Caudoviricetes	dsDNA	Prokaryote	Duplodnaviria	Heunggongvirae	Uroviricota	Caudoviricetes
SM1000_MG_EukFloat_scaffold_264	SM1000_MG_EukFloat_scaffold_264	MG_eukfloat	yes	20750	No	22	6	0	Low-quality	Genome-fragment	49.44	AAI-based (high-confidence)	1		11	0.969	8	19.6397	Viruses;Duplodnaviria;Heunggongvirae;Uroviricota;Caudoviricetes	dsDNA	Prokaryote	Duplodnaviria	Heunggongvirae	Uroviricota	Caudoviricetes
SM1000_MG_EukFloat_scaffold_266	SM1000_MG_EukFloat_scaffold_266	MG_eukfloat	yes	20657	No	29	3	0	Low-quality	Genome-fragment	22.74	HMM-based (lower-bound)	1		11	0.9527	2	9.1279	Viruses;Duplodnaviria;Heunggongvirae;Uroviricota;Caudoviricetes	dsDNA	Prokaryote	Duplodnaviria	Heunggongvirae	Uroviricota	Caudoviricetes
SM1000_MG_EukFloat_scaffold_267	SM1000_MG_EukFloat_scaffold_267	MG_eukfloat	yes	20635	No	21	2	0	Low-quality	Genome-fragment	22.49	HMM-based (lower-bound)	1		11	0.9597	2	11.0633	Viruses;Duplodnaviria;Heunggongvirae;Uroviricota;Caudoviricetes	dsDNA	Prokaryote	Duplodnaviria	Heunggongvirae	Uroviricota	Caudoviricetes
SM1000_MG_EukFloat_scaffold_27	SM1000_MG_EukFloat_scaffold_27	MG_eukfloat	yes	61326	No	110	11	2	Medium-quality	Genome-fragment	78.99	HMM-based (lower-bound)	1		11	0.974	6	37.7176	Viruses;Duplodnaviria;Heunggongvirae;Uroviricota;Caudoviricetes	dsDNA	Prokaryote	Duplodnaviria	Heunggongvirae	Uroviricota	Caudoviricetes
SM1000_MG_EukFloat_scaffold_277	SM1000_MG_EukFloat_scaffold_277	MG_eukfloat	yes	20276	No	29	8	0	Low-quality	Genome-fragment	44.61	AAI-based (medium-confidence)	1.01		11	0.9785	1	25.0773	Viruses;Duplodnaviria;Heunggongvirae;Uroviricota;Caudoviricetes	dsDNA	Prokaryote	Duplodnaviria	Heunggongvirae	Uroviricota	Caudoviricetes
SM1000_MG_EukFloat_scaffold_278	SM1000_MG_EukFloat_scaffold_278	MG_eukfloat	yes	20242	No	52	8	2	Low-quality	Genome-fragment	17.57	HMM-based (lower-bound)	1		11	0.9084	3	12.7286	Viruses;Duplodnaviria;Heunggongvirae;Uroviricota;Caudoviricetes	dsDNA	Prokaryote	Duplodnaviria	Heunggongvirae	Uroviricota	Caudoviricetes
SM1000_MG_EukFloat_scaffold_283	SM1000_MG_EukFloat_scaffold_283	MG_eukfloat	yes	20061	No	43	3	3	Low-quality	Genome-fragment	36.59	HMM-based (lower-bound)	1		11	0.9552	0	14.0605	Viruses;Duplodnaviria;Heunggongvirae;Uroviricota;Caudoviricetes	dsDNA	Prokaryote	Duplodnaviria	Heunggongvirae	Uroviricota	Caudoviricetes
SM1000_MG_EukFloat_scaffold_287	SM1000_MG_EukFloat_scaffold_287	MG_eukfloat	yes	19900	No	41	3	1	Low-quality	Genome-fragment	34.28	AAI-based (medium-confidence)	1		11	0.8815	2	6.9333	Viruses;Duplodnaviria;Heunggongvirae;Uroviricota;Caudoviricetes	dsDNA	Prokaryote	Duplodnaviria	Heunggongvirae	Uroviricota	Caudoviricetes
SM1000_MG_EukFloat_scaffold_288	SM1000_MG_EukFloat_scaffold_288	MG_eukfloat	yes	19857	No	25	7	0	Low-quality	Genome-fragment	48.35	AAI-based (medium-confidence)	1		11	0.981	4	23.4264	Viruses;Duplodnaviria;Heunggongvirae;Uroviricota;Caudoviricetes	dsDNA	Prokaryote	Duplodnaviria	Heunggongvirae	Uroviricota	Caudoviricetes
SM1000_MG_EukFloat_scaffold_29	SM1000_MG_EukFloat_scaffold_29	MG_eukfloat	yes	60734	No	106	15	1	Medium-quality	Genome-fragment	59.45	HMM-based (lower-bound)	1		11	0.9626	6	46.4736	Viruses;Duplodnaviria;Heunggongvirae;Uroviricota;Caudoviricetes	dsDNA	Prokaryote	Duplodnaviria	Heunggongvirae	Uroviricota	Caudoviricetes
SM1000_MG_EukFloat_scaffold_290	SM1000_MG_EukFloat_scaffold_290	MG_eukfloat	yes	19773	No	29	9	0	Low-quality	Genome-fragment	32.48	AAI-based (medium-confidence)	1		11	0.938	0	17.7239	Viruses;Duplodnaviria;Heunggongvirae;Uroviricota;Caudoviricetes	dsDNA	Prokaryote	Duplodnaviria	Heunggongvirae	Uroviricota	Caudoviricetes
SM1000_MG_EukFloat_scaffold_296	SM1000_MG_EukFloat_scaffold_296	MG_eukfloat	yes	19480	No	22	6	0	Complete	High-quality	100	DTR (high-confidence)	1		11	0.9783	4	19.4094	Viruses;Duplodnaviria;Heunggongvirae;Uroviricota;Caudoviricetes	dsDNA	Prokaryote	Duplodnaviria	Heunggongvirae	Uroviricota	Caudoviricetes
SM1000_MG_EukFloat_scaffold_3	SM1000_MG_EukFloat_scaffold_3	MG_eukfloat	yes	117050	No	188	28	5	Complete	High-quality	100	DTR (high-confidence)	1		11	0.9348	15	61.8235	Viruses;Duplodnaviria;Heunggongvirae;Uroviricota;Caudoviricetes	dsDNA	Prokaryote	Duplodnaviria	Heunggongvirae	Uroviricota	Caudoviricetes
SM1000_MG_EukFloat_scaffold_30	SM1000_MG_EukFloat_scaffold_30	MG_eukfloat	yes	58768	No	72	16	1	High-quality	High-quality	91.46	AAI-based (medium-confidence)	1		11	0.9785	8	40.4297	Viruses;Duplodnaviria;Heunggongvirae;Uroviricota;Caudoviricetes	dsDNA	Prokaryote	Duplodnaviria	Heunggongvirae	Uroviricota	Caudoviricetes
SM1000_MG_EukFloat_scaffold_300	SM1000_MG_EukFloat_scaffold_300	MG_eukfloat	yes	19252	No	31	11	2	Low-quality	Genome-fragment	30.75	AAI-based (high-confidence)	1		11	0.976	1	18.1714	Viruses;Duplodnaviria;Heunggongvirae;Uroviricota;Caudoviricetes	dsDNA	Prokaryote	Duplodnaviria	Heunggongvirae	Uroviricota	Caudoviricetes
SM1000_MG_EukFloat_scaffold_301	SM1000_MG_EukFloat_scaffold_301	MG_eukfloat	yes	19147	No	24	5	0	Complete	High-quality	100	DTR (high-confidence)	1.01		11	0.9476	5	11.4273	Viruses;Duplodnaviria;Heunggongvirae;Uroviricota;Caudoviricetes	dsDNA	Prokaryote	Duplodnaviria	Heunggongvirae	Uroviricota	Caudoviricetes
SM1000_MG_EukFloat_scaffold_306	SM1000_MG_EukFloat_scaffold_306	MG_eukfloat	yes	18973	No	29	7	0	Complete	High-quality	100	DTR (high-confidence)	1.01		11	0.9642	8	22.2873	Viruses;Duplodnaviria;Heunggongvirae;Uroviricota;Caudoviricetes	dsDNA	Prokaryote	Duplodnaviria	Heunggongvirae	Uroviricota	Caudoviricetes
SM1000_MG_EukFloat_scaffold_31	SM1000_MG_EukFloat_scaffold_31,SM1001_MG_EukFloat_scaffold_220,SM1027_MG_EukFloat_scaffold_191	MG_eukfloat	yes	58072	No	94	17	1	Medium-quality	Genome-fragment	57.38	AAI-based (medium-confidence)	1		11	0.9668	3	34.531	Viruses;Duplodnaviria;Heunggongvirae;Uroviricota;Caudoviricetes	dsDNA	Prokaryote	Duplodnaviria	Heunggongvirae	Uroviricota	Caudoviricetes
SM1000_MG_EukFloat_scaffold_313	SM1000_MG_EukFloat_scaffold_313	MG_eukfloat	yes	18656	No	28	8	0	Low-quality	Genome-fragment	42.73	AAI-based (high-confidence)	1		11	0.9621	2	11.595	Viruses;Duplodnaviria;Heunggongvirae;Uroviricota;Caudoviricetes	dsDNA	Prokaryote	Duplodnaviria	Heunggongvirae	Uroviricota	Caudoviricetes
SM1000_MG_EukFloat_scaffold_318	SM1000_MG_EukFloat_scaffold_318	MG_eukfloat	yes	18561	No	27	7	0	Low-quality	Genome-fragment	34.18	AAI-based (medium-confidence)	1		11	0.9747	4	16.876	Viruses;Duplodnaviria;Heunggongvirae;Uroviricota;Caudoviricetes	dsDNA	Prokaryote	Duplodnaviria	Heunggongvirae	Uroviricota	Caudoviricetes
SM1000_MG_EukFloat_scaffold_319	SM1000_MG_EukFloat_scaffold_319	MG_eukfloat	yes	18542	No	29	1	0	Low-quality	Genome-fragment	43.24	AAI-based (medium-confidence)	1		11	0.9427	5	14.4416	Viruses;Duplodnaviria;Heunggongvirae;Uroviricota;Caudoviricetes	dsDNA	Prokaryote	Duplodnaviria	Heunggongvirae	Uroviricota	Caudoviricetes
SM1000_MG_EukFloat_scaffold_32	SM1000_MG_EukFloat_scaffold_32	MG_eukfloat	yes	56648	No	82	14	1	Complete	High-quality	100	DTR (high-confidence)	1		11	0.9704	7	49.3245	Viruses;Duplodnaviria;Heunggongvirae;Uroviricota;Caudoviricetes	dsDNA	Prokaryote	Duplodnaviria	Heunggongvirae	Uroviricota	Caudoviricetes
SM1000_MG_EukFloat_scaffold_326	SM1000_MG_EukFloat_scaffold_326	MG_eukfloat	yes	18402	No	30	9	1	Low-quality	Genome-fragment	48.06	AAI-based (medium-confidence)	1		11	0.9795	6	28.6439	Viruses;Duplodnaviria;Heunggongvirae;Uroviricota;Caudoviricetes	dsDNA	Prokaryote	Duplodnaviria	Heunggongvirae	Uroviricota	Caudoviricetes
SM1000_MG_EukFloat_scaffold_327	SM1000_MG_EukFloat_scaffold_327	MG_eukfloat	yes	18329	No	21	7	1	High-quality	High-quality	94.91	AAI-based (medium-confidence)	1		11	0.9727	4	16.0661	Viruses;Duplodnaviria;Heunggongvirae;Uroviricota;Caudoviricetes	dsDNA	Prokaryote	Duplodnaviria	Heunggongvirae	Uroviricota	Caudoviricetes
SM1000_MG_EukFloat_scaffold_328	SM1000_MG_EukFloat_scaffold_328	MG_eukfloat	yes	18321	No	26	5	0	Low-quality	Genome-fragment	31.09	AAI-based (high-confidence)	1		11	0.9701	2	16.0482	Viruses;Duplodnaviria;Heunggongvirae;Uroviricota;Caudoviricetes	dsDNA	Prokaryote	Duplodnaviria	Heunggongvirae	Uroviricota	Caudoviricetes
SM1000_MG_EukFloat_scaffold_329	SM1000_MG_EukFloat_scaffold_329	MG_eukfloat	yes	18303	No	36	5	1	Low-quality	Genome-fragment	31.54	AAI-based (medium-confidence)	1		11	0.9603	5	16.7305	Viruses;Duplodnaviria;Heunggongvirae;Uroviricota;Caudoviricetes	dsDNA	Prokaryote	Duplodnaviria	Heunggongvirae	Uroviricota	Caudoviricetes
SM1000_MG_EukFloat_scaffold_33	SM1000_MG_EukFloat_scaffold_33	MG_eukfloat	yes	55294	No	77	22	4	High-quality	High-quality	100	AAI-based (medium-confidence)	1		11	0.9337	14	51.9607	Viruses;Duplodnaviria;Heunggongvirae;Uroviricota;Caudoviricetes	dsDNA	Prokaryote	Duplodnaviria	Heunggongvirae	Uroviricota	Caudoviricetes
SM1000_MG_EukFloat_scaffold_331	SM1000_MG_EukFloat_scaffold_331	MG_eukfloat	yes	18185	No	28	6	0	Low-quality	Genome-fragment	11.3	AAI-based (medium-confidence)	1		11	0.9367	2	8.8793	Viruses;Duplodnaviria;Heunggongvirae;Uroviricota;Caudoviricetes	dsDNA	Prokaryote	Duplodnaviria	Heunggongvirae	Uroviricota	Caudoviricetes
SM1000_MG_EukFloat_scaffold_332	SM1000_MG_EukFloat_scaffold_332	MG_eukfloat	yes	18185	No	18	3	0	Low-quality	Genome-fragment	11.81	AAI-based (high-confidence)	1		11	0.965	2	14.7005	Viruses;Duplodnaviria;Heunggongvirae;Uroviricota;Caudoviricetes	dsDNA	Prokaryote	Duplodnaviria	Heunggongvirae	Uroviricota	Caudoviricetes
SM1000_MG_EukFloat_scaffold_336	SM1000_MG_EukFloat_scaffold_336	MG_eukfloat	yes	18114	No	35	3	0	Low-quality	Genome-fragment	16.8	HMM-based (lower-bound)	1		11	0.9729	0	11.7391	Viruses;Duplodnaviria;Heunggongvirae;Uroviricota;Caudoviricetes	dsDNA	Prokaryote	Duplodnaviria	Heunggongvirae	Uroviricota	Caudoviricetes
SM1000_MG_EukFloat_scaffold_338	SM1000_MG_EukFloat_scaffold_338	MG_eukfloat	yes	18071	No	25	5	0	Medium-quality	Genome-fragment	58.87	AAI-based (medium-confidence)	1		11	0.9788	4	16.449	Viruses;Duplodnaviria;Heunggongvirae;Uroviricota;Caudoviricetes	dsDNA	Prokaryote	Duplodnaviria	Heunggongvirae	Uroviricota	Caudoviricetes
SM1000_MG_EukFloat_scaffold_340	SM1000_MG_EukFloat_scaffold_340	MG_eukfloat	yes	17937	No	30	3	0	Low-quality	Genome-fragment	21.08	HMM-based (lower-bound)	1		11	0.9679	2	5.1209	Viruses;Duplodnaviria;Heunggongvirae;Uroviricota;Caudoviricetes	dsDNA	Prokaryote	Duplodnaviria	Heunggongvirae	Uroviricota	Caudoviricetes
SM1000_MG_EukFloat_scaffold_345	SM1000_MG_EukFloat_scaffold_345	MG_eukfloat	yes	17744	No	27	6	1	Low-quality	Genome-fragment	24.44	HMM-based (lower-bound)	1		11	0.9317	0	8.5752	Viruses;Duplodnaviria;Heunggongvirae;Uroviricota;Caudoviricetes	dsDNA	Prokaryote	Duplodnaviria	Heunggongvirae	Uroviricota	Caudoviricetes
SM1000_MG_EukFloat_scaffold_346	SM1000_MG_EukFloat_scaffold_346	MG_eukfloat	yes	17735	No	22	9	0	Low-quality	Genome-fragment	35.5	AAI-based (medium-confidence)	1		11	0.9517	5	17.172	Viruses;Duplodnaviria;Heunggongvirae;Uroviricota;Caudoviricetes	dsDNA	Prokaryote	Duplodnaviria	Heunggongvirae	Uroviricota	Caudoviricetes
SM1000_MG_EukFloat_scaffold_347	SM1000_MG_EukFloat_scaffold_347,SM1005_MG_EukFloat_scaffold_1515,SM1028_MG_EukFloat_scaffold_5073,SM1031_MG_EukFloat_scaffold_3070,SM1002_MG_EukFloat_scaffold_6658	MG_eukfloat	yes	17734	No	25	6	0	High-quality	High-quality	100	AAI-based (medium-confidence)	1		11	0.967	5	21.0699	Viruses;Duplodnaviria;Heunggongvirae;Uroviricota;Caudoviricetes	dsDNA	Prokaryote	Duplodnaviria	Heunggongvirae	Uroviricota	Caudoviricetes
SM1000_MG_EukFloat_scaffold_35	SM1000_MG_EukFloat_scaffold_35	MG_eukfloat	yes	54227	No	101	23	0	Medium-quality	Genome-fragment	70.8	HMM-based (lower-bound)	1		11	0.9765	8	63.2162	Viruses;Duplodnaviria;Heunggongvirae;Uroviricota;Caudoviricetes	dsDNA	Prokaryote	Duplodnaviria	Heunggongvirae	Uroviricota	Caudoviricetes
SM1000_MG_EukFloat_scaffold_350	SM1000_MG_EukFloat_scaffold_350	MG_eukfloat	yes	17690	No	25	4	0	Complete	High-quality	100	DTR (medium-confidence)	1.01		11	0.9677	5	14.6324	Viruses;Duplodnaviria;Heunggongvirae;Uroviricota;Caudoviricetes	dsDNA	Prokaryote	Duplodnaviria	Heunggongvirae	Uroviricota	Caudoviricetes
SM1000_MG_EukFloat_scaffold_354	SM1000_MG_EukFloat_scaffold_354	MG_eukfloat	yes	17618	No	25	5	0	High-quality	High-quality	95.11	AAI-based (medium-confidence)	1		11	0.9636	7	20.1019	Viruses;Duplodnaviria;Heunggongvirae;Uroviricota;Caudoviricetes	dsDNA	Prokaryote	Duplodnaviria	Heunggongvirae	Uroviricota	Caudoviricetes
SM1000_MG_EukFloat_scaffold_357	SM1000_MG_EukFloat_scaffold_357	MG_eukfloat	yes	17562	No	28	6	3	Low-quality	Genome-fragment	16.97	AAI-based (medium-confidence)	1		11	0.949	6	19.9006	Viruses;Duplodnaviria;Heunggongvirae;Uroviricota;Caudoviricetes	dsDNA	Prokaryote	Duplodnaviria	Heunggongvirae	Uroviricota	Caudoviricetes
SM1000_MG_EukFloat_scaffold_359	SM1000_MG_EukFloat_scaffold_359	MG_eukfloat	yes	17542	No	45	4	0	Low-quality	Genome-fragment	17.76	HMM-based (lower-bound)	1		11	0.9429	2	17.5262	Viruses;Duplodnaviria;Heunggongvirae;Uroviricota;Caudoviricetes	dsDNA	Prokaryote	Duplodnaviria	Heunggongvirae	Uroviricota	Caudoviricetes
SM1000_MG_EukFloat_scaffold_36	SM1000_MG_EukFloat_scaffold_36	MG_eukfloat	yes	52000	No	78	13	1	Medium-quality	Genome-fragment	62.18	HMM-based (lower-bound)	1		11	0.9552	10	46.8323	Viruses;Duplodnaviria;Heunggongvirae;Uroviricota;Caudoviricetes	dsDNA	Prokaryote	Duplodnaviria	Heunggongvirae	Uroviricota	Caudoviricetes
SM1000_MG_EukFloat_scaffold_362	SM1000_MG_EukFloat_scaffold_362	MG_eukfloat	yes	17484	No	24	8	0	Low-quality	Genome-fragment	22.21	HMM-based (lower-bound)	1		11	0.9649	3	18.6692	Viruses;Duplodnaviria;Heunggongvirae;Uroviricota;Caudoviricetes	dsDNA	Prokaryote	Duplodnaviria	Heunggongvirae	Uroviricota	Caudoviricetes
SM1000_MG_EukFloat_scaffold_363	SM1000_MG_EukFloat_scaffold_363	MG_eukfloat	yes	17468	No	19	3	1	Low-quality	Genome-fragment	25.44	AAI-based (medium-confidence)	1		11	0.9738	0	7.1013	Viruses;Duplodnaviria;Heunggongvirae;Uroviricota;Caudoviricetes	dsDNA	Prokaryote	Duplodnaviria	Heunggongvirae	Uroviricota	Caudoviricetes
SM1000_MG_EukFloat_scaffold_365	SM1000_MG_EukFloat_scaffold_365	MG_eukfloat	yes	17437	No	21	5	0	Low-quality	Genome-fragment	38.91	AAI-based (medium-confidence)	1		11	0.9741	0	14.8648	Viruses;Duplodnaviria;Heunggongvirae;Uroviricota;Caudoviricetes	dsDNA	Prokaryote	Duplodnaviria	Heunggongvirae	Uroviricota	Caudoviricetes
SM1000_MG_EukFloat_scaffold_37	SM1000_MG_EukFloat_scaffold_37	MG_eukfloat	yes	51901	No	84	14	0	Medium-quality	Genome-fragment	82.44	AAI-based (medium-confidence)	1		11	0.9773	9	40.2198	Viruses;Duplodnaviria;Heunggongvirae;Uroviricota;Caudoviricetes	dsDNA	Prokaryote	Duplodnaviria	Heunggongvirae	Uroviricota	Caudoviricetes
SM1000_MG_EukFloat_scaffold_371	SM1000_MG_EukFloat_scaffold_371	MG_eukfloat	yes	17238	No	31	9	0	Low-quality	Genome-fragment	33.36	AAI-based (medium-confidence)	1		11	0.9727	3	17.6073	Viruses;Duplodnaviria;Heunggongvirae;Uroviricota;Caudoviricetes	dsDNA	Prokaryote	Duplodnaviria	Heunggongvirae	Uroviricota	Caudoviricetes
SM1000_MG_EukFloat_scaffold_374	SM1000_MG_EukFloat_scaffold_374	MG_eukfloat	yes	17212	No	19	3	0	Low-quality	Genome-fragment	25.45	HMM-based (lower-bound)	1		11	0.959	4	12.2241	Viruses;Duplodnaviria;Heunggongvirae;Uroviricota;Caudoviricetes	dsDNA	Prokaryote	Duplodnaviria	Heunggongvirae	Uroviricota	Caudoviricetes
SM1000_MG_EukFloat_scaffold_376	SM1000_MG_EukFloat_scaffold_376,SM1002_MG_EukFloat_scaffold_6656,SM1028_MG_EukFloat_scaffold_14933	MG_eukfloat	yes	17158	No	42	7	1	Low-quality	Genome-fragment	17	HMM-based (lower-bound)	1		11	0.9419	1	12.3043	Viruses;Duplodnaviria;Heunggongvirae;Uroviricota;Caudoviricetes	dsDNA	Prokaryote	Duplodnaviria	Heunggongvirae	Uroviricota	Caudoviricetes
SM1000_MG_EukFloat_scaffold_378	SM1000_MG_EukFloat_scaffold_378	MG_eukfloat	yes	17119	No	45	1	1	Low-quality	Genome-fragment	27.3	HMM-based (lower-bound)	1		11	0.7821	0	1.5755	Viruses;Duplodnaviria;Heunggongvirae;Uroviricota;Caudoviricetes	dsDNA	Prokaryote	Duplodnaviria	Heunggongvirae	Uroviricota	Caudoviricetes
SM1000_MG_EukFloat_scaffold_38	SM1000_MG_EukFloat_scaffold_38	MG_eukfloat	yes	51683	No	89	27	1	Complete	High-quality	100	DTR (high-confidence)	1		11	0.968	14	64.0269	Viruses;Duplodnaviria;Heunggongvirae;Uroviricota;Caudoviricetes	dsDNA	Prokaryote	Duplodnaviria	Heunggongvirae	Uroviricota	Caudoviricetes
SM1000_MG_EukFloat_scaffold_390	SM1000_MG_EukFloat_scaffold_390	MG_eukfloat	yes	16944	No	19	2	0	Low-quality	Genome-fragment	34.3	AAI-based (medium-confidence)	1		11	0.9626	0	10.8405	Viruses;Duplodnaviria;Heunggongvirae;Uroviricota;Caudoviricetes	dsDNA	Prokaryote	Duplodnaviria	Heunggongvirae	Uroviricota	Caudoviricetes
SM1000_MG_EukFloat_scaffold_393	SM1000_MG_EukFloat_scaffold_393	MG_eukfloat	yes	16879	No	24	5	0	Medium-quality	Genome-fragment	56.31	AAI-based (medium-confidence)	1		11	0.9812	3	19.4941	Viruses;Duplodnaviria;Heunggongvirae;Uroviricota;Caudoviricetes	dsDNA	Prokaryote	Duplodnaviria	Heunggongvirae	Uroviricota	Caudoviricetes
SM1000_MG_EukFloat_scaffold_396	SM1000_MG_EukFloat_scaffold_396	MG_eukfloat	yes	16840	No	37	4	0	Low-quality	Genome-fragment	35.86	AAI-based (medium-confidence)	1		11	0.9725	1	7.6878	Viruses;Duplodnaviria;Heunggongvirae;Uroviricota;Caudoviricetes	dsDNA	Prokaryote	Duplodnaviria	Heunggongvirae	Uroviricota	Caudoviricetes
SM1000_MG_EukFloat_scaffold_4	SM1000_MG_EukFloat_scaffold_4	MG_eukfloat	yes	114694	No	176	21	10	Medium-quality	Genome-fragment	52.58	HMM-based (lower-bound)	1		11	0.9686	2	86.2412	Viruses;Duplodnaviria;Heunggongvirae;Uroviricota;Caudoviricetes	dsDNA	Prokaryote	Duplodnaviria	Heunggongvirae	Uroviricota	Caudoviricetes
SM1000_MG_EukFloat_scaffold_41	SM1000_MG_EukFloat_scaffold_41,SM1001_MG_EukFloat_scaffold_731,SM1028_MG_EukFloat_scaffold_1652,SM1028_MG_EukFloat_scaffold_8349	MG_eukfloat	yes	51102	No	68	19	0	Medium-quality	Genome-fragment	86.63	AAI-based (high-confidence)	1		11	0.9664	6	44.3339	Viruses;Duplodnaviria;Heunggongvirae;Uroviricota;Caudoviricetes	dsDNA	Prokaryote	Duplodnaviria	Heunggongvirae	Uroviricota	Caudoviricetes
SM1000_MG_EukFloat_scaffold_410	SM1000_MG_EukFloat_scaffold_410	MG_eukfloat	yes	16579	No	28	1	0	Low-quality	Genome-fragment	12.08	AAI-based (medium-confidence)	1		11	0.9678	0	3.1923	Viruses;Duplodnaviria;Heunggongvirae;Uroviricota;Caudoviricetes	dsDNA	Prokaryote	Duplodnaviria	Heunggongvirae	Uroviricota	Caudoviricetes
SM1000_MG_EukFloat_scaffold_411	SM1000_MG_EukFloat_scaffold_411	MG_eukfloat	yes	16569	No	21	2	1	Low-quality	Genome-fragment	27.16	AAI-based (medium-confidence)	1		11	0.9719	1	14.8826	Viruses;Duplodnaviria;Heunggongvirae;Uroviricota;Caudoviricetes	dsDNA	Prokaryote	Duplodnaviria	Heunggongvirae	Uroviricota	Caudoviricetes
SM1000_MG_EukFloat_scaffold_415	SM1000_MG_EukFloat_scaffold_415	MG_eukfloat	yes	16503	No	33	5	0	Low-quality	Genome-fragment	17.49	AAI-based (medium-confidence)	1		11	0.9392	0	14.936	Viruses;Duplodnaviria;Heunggongvirae;Uroviricota;Caudoviricetes	dsDNA	Prokaryote	Duplodnaviria	Heunggongvirae	Uroviricota	Caudoviricetes
SM1000_MG_EukFloat_scaffold_416	SM1000_MG_EukFloat_scaffold_416	MG_eukfloat	yes	16479	No	19	6	0	Medium-quality	Genome-fragment	89.34	AAI-based (medium-confidence)	1		11	0.9756	9	23.5483	Viruses;Duplodnaviria;Heunggongvirae;Uroviricota;Caudoviricetes	dsDNA	Prokaryote	Duplodnaviria	Heunggongvirae	Uroviricota	Caudoviricetes
SM1000_MG_EukFloat_scaffold_42	SM1000_MG_EukFloat_scaffold_42	MG_eukfloat	yes	50502	No	74	9	0	Medium-quality	Genome-fragment	75.25	HMM-based (lower-bound)	1		11	0.9693	3	42.8064	Viruses;Duplodnaviria;Heunggongvirae;Uroviricota;Caudoviricetes	dsDNA	Prokaryote	Duplodnaviria	Heunggongvirae	Uroviricota	Caudoviricetes
SM1000_MG_EukFloat_scaffold_421	SM1000_MG_EukFloat_scaffold_421	MG_eukfloat	yes	16417	No	27	4	0	Low-quality	Genome-fragment	21.26	HMM-based (lower-bound)	1		11	0.9449	2	7.3376	Viruses;Duplodnaviria;Heunggongvirae;Uroviricota;Caudoviricetes	dsDNA	Prokaryote	Duplodnaviria	Heunggongvirae	Uroviricota	Caudoviricetes
SM1000_MG_EukFloat_scaffold_43	SM1000_MG_EukFloat_scaffold_43,SM1029_MG_EukFloat_scaffold_8692	MG_eukfloat	yes	50439	No	75	10	0	Complete	High-quality	100	DTR (high-confidence)	1		11	0.9757	7	38.9211	Viruses;Duplodnaviria;Heunggongvirae;Uroviricota;Caudoviricetes	dsDNA	Prokaryote	Duplodnaviria	Heunggongvirae	Uroviricota	Caudoviricetes
SM1000_MG_EukFloat_scaffold_435	SM1000_MG_EukFloat_scaffold_435	MG_eukfloat	yes	16114	No	18	8	0	Low-quality	Genome-fragment	27.8	AAI-based (medium-confidence)	1		11	0.9825	2	21.8878	Viruses;Duplodnaviria;Heunggongvirae;Uroviricota;Caudoviricetes	dsDNA	Prokaryote	Duplodnaviria	Heunggongvirae	Uroviricota	Caudoviricetes
SM1000_MG_EukFloat_scaffold_441	SM1000_MG_EukFloat_scaffold_441	MG_eukfloat	yes	16030	No	22	5	0	Low-quality	Genome-fragment	31.84	AAI-based (medium-confidence)	1		11	0.9795	4	16.4197	Viruses;Duplodnaviria;Heunggongvirae;Uroviricota;Caudoviricetes	dsDNA	Prokaryote	Duplodnaviria	Heunggongvirae	Uroviricota	Caudoviricetes
SM1000_MG_EukFloat_scaffold_443	SM1000_MG_EukFloat_scaffold_443	MG_eukfloat	yes	16024	No	26	5	0	Low-quality	Genome-fragment	24.47	AAI-based (medium-confidence)	1		11	0.9742	1	14.1527	Viruses;Duplodnaviria;Heunggongvirae;Uroviricota;Caudoviricetes;Crassvirales	dsDNA	Prokaryote	Duplodnaviria	Heunggongvirae	Uroviricota	Caudoviricetes	Crassvirales
SM1000_MG_EukFloat_scaffold_446	SM1000_MG_EukFloat_scaffold_446	MG_eukfloat	yes	15952	No	24	3	0	Low-quality	Genome-fragment	24.43	HMM-based (lower-bound)	1		11	0.9805	3	15.3554	Viruses;Duplodnaviria;Heunggongvirae;Uroviricota;Caudoviricetes	dsDNA	Prokaryote	Duplodnaviria	Heunggongvirae	Uroviricota	Caudoviricetes
SM1000_MG_EukFloat_scaffold_452	SM1000_MG_EukFloat_scaffold_452	MG_eukfloat	yes	15811	No	22	13	0	Low-quality	Genome-fragment	39.47	AAI-based (high-confidence)	1		11	0.9753	10	25.3869	Viruses;Duplodnaviria;Heunggongvirae;Uroviricota;Caudoviricetes	dsDNA	Prokaryote	Duplodnaviria	Heunggongvirae	Uroviricota	Caudoviricetes
SM1000_MG_EukFloat_scaffold_453	SM1000_MG_EukFloat_scaffold_453	MG_eukfloat	yes	15801	No	14	2	0	Low-quality	Genome-fragment	10.36	AAI-based (medium-confidence)	1		11	0.9763	0	16.6701	Viruses;Duplodnaviria;Heunggongvirae;Uroviricota;Caudoviricetes	dsDNA	Prokaryote	Duplodnaviria	Heunggongvirae	Uroviricota	Caudoviricetes
SM1000_MG_EukFloat_scaffold_457	SM1000_MG_EukFloat_scaffold_457	MG_eukfloat	yes	15658	No	40	7	0	Low-quality	Genome-fragment	21.77	HMM-based (lower-bound)	1		11	0.9503	3	15.8802	Viruses;Duplodnaviria;Heunggongvirae;Uroviricota;Caudoviricetes	dsDNA	Prokaryote	Duplodnaviria	Heunggongvirae	Uroviricota	Caudoviricetes
SM1000_MG_EukFloat_scaffold_459	SM1000_MG_EukFloat_scaffold_459	MG_eukfloat	yes	15623	No	21	2	0	Low-quality	Genome-fragment	33.7	AAI-based (high-confidence)	1		11	0.98	2	10.8705	Viruses;Duplodnaviria;Heunggongvirae;Uroviricota;Caudoviricetes	dsDNA	Prokaryote	Duplodnaviria	Heunggongvirae	Uroviricota	Caudoviricetes
SM1000_MG_EukFloat_scaffold_464	SM1000_MG_EukFloat_scaffold_464	MG_eukfloat	yes	15512	No	27	4	0	Low-quality	Genome-fragment	34.68	AAI-based (medium-confidence)	1		11	0.9709	2	13.6493	Viruses;Duplodnaviria;Heunggongvirae;Uroviricota;Caudoviricetes	dsDNA	Prokaryote	Duplodnaviria	Heunggongvirae	Uroviricota	Caudoviricetes
SM1000_MG_EukFloat_scaffold_47	SM1000_MG_EukFloat_scaffold_47	MG_eukfloat	yes	49386	No	87	17	1	Medium-quality	Genome-fragment	73.87	HMM-based (lower-bound)	1		11	0.9599	4	39.315	Viruses;Duplodnaviria;Heunggongvirae;Uroviricota;Caudoviricetes	dsDNA	Prokaryote	Duplodnaviria	Heunggongvirae	Uroviricota	Caudoviricetes
SM1000_MG_EukFloat_scaffold_471	SM1000_MG_EukFloat_scaffold_471	MG_eukfloat	yes	15337	No	33	4	0	Low-quality	Genome-fragment	11.58	HMM-based (lower-bound)	1		11	0.9667	1	11.1108	Viruses;Duplodnaviria;Heunggongvirae;Uroviricota;Caudoviricetes	dsDNA	Prokaryote	Duplodnaviria	Heunggongvirae	Uroviricota	Caudoviricetes
SM1000_MG_EukFloat_scaffold_473	SM1000_MG_EukFloat_scaffold_473	MG_eukfloat	yes	15305	No	23	8	0	Low-quality	Genome-fragment	34.71	AAI-based (medium-confidence)	1		11	0.9806	1	27.9707	Viruses;Duplodnaviria;Heunggongvirae;Uroviricota;Caudoviricetes	dsDNA	Prokaryote	Duplodnaviria	Heunggongvirae	Uroviricota	Caudoviricetes
SM1000_MG_EukFloat_scaffold_475	SM1000_MG_EukFloat_scaffold_475	MG_eukfloat	yes	15286	No	33	1	0	Low-quality	Genome-fragment	7.96	HMM-based (lower-bound)	1		11	0.9289	0	10.183	Viruses;Duplodnaviria;Heunggongvirae;Uroviricota;Caudoviricetes	dsDNA	Prokaryote	Duplodnaviria	Heunggongvirae	Uroviricota	Caudoviricetes
SM1000_MG_EukFloat_scaffold_477	SM1000_MG_EukFloat_scaffold_477	MG_eukfloat	yes	15273	No	21	3	0	Low-quality	Genome-fragment	25.92	AAI-based (high-confidence)	1		11	0.8305	1	2.6626	Viruses;Duplodnaviria;Heunggongvirae;Uroviricota;Caudoviricetes	dsDNA	Prokaryote	Duplodnaviria	Heunggongvirae	Uroviricota	Caudoviricetes
SM1000_MG_EukFloat_scaffold_478	SM1000_MG_EukFloat_scaffold_478	MG_eukfloat	yes	15267	No	28	5	0	Low-quality	Genome-fragment	10.64	HMM-based (lower-bound)	1		11	0.9656	1	16.6726	Viruses;Duplodnaviria;Heunggongvirae;Uroviricota;Caudoviricetes	dsDNA	Prokaryote	Duplodnaviria	Heunggongvirae	Uroviricota	Caudoviricetes
SM1000_MG_EukFloat_scaffold_48	SM1000_MG_EukFloat_scaffold_48	MG_eukfloat	yes	49077	No	77	14	0	Medium-quality	Genome-fragment	68.79	HMM-based (lower-bound)	1.01		11	0.9568	5	49.6219	Viruses;Duplodnaviria;Heunggongvirae;Uroviricota;Caudoviricetes	dsDNA	Prokaryote	Duplodnaviria	Heunggongvirae	Uroviricota	Caudoviricetes
SM1000_MG_EukFloat_scaffold_482	SM1000_MG_EukFloat_scaffold_482	MG_eukfloat	yes	15204	No	22	4	1	Low-quality	Genome-fragment	13.46	HMM-based (lower-bound)	1		11	0.9648	3	13.6557	Viruses;Duplodnaviria;Heunggongvirae;Uroviricota;Caudoviricetes	dsDNA	Prokaryote	Duplodnaviria	Heunggongvirae	Uroviricota	Caudoviricetes
SM1000_MG_EukFloat_scaffold_490	SM1000_MG_EukFloat_scaffold_490	MG_eukfloat	yes	15060	No	20	2	0	Low-quality	Genome-fragment	33.28	AAI-based (medium-confidence)	1.01		11	0.8968	1	7.8778	Viruses;Duplodnaviria;Heunggongvirae;Uroviricota;Caudoviricetes	dsDNA	Prokaryote	Duplodnaviria	Heunggongvirae	Uroviricota	Caudoviricetes
SM1000_MG_EukFloat_scaffold_5	SM1000_MG_EukFloat_scaffold_5	MG_eukfloat	yes	97595	No	157	25	5	Complete	High-quality	100	DTR (high-confidence)	1		11	0.9222	7	53.7119	Viruses;Duplodnaviria;Heunggongvirae;Uroviricota;Caudoviricetes	dsDNA	Prokaryote	Duplodnaviria	Heunggongvirae	Uroviricota	Caudoviricetes
SM1000_MG_EukFloat_scaffold_503	SM1000_MG_EukFloat_scaffold_503	MG_eukfloat	yes	14861	No	34	1	0	Low-quality	Genome-fragment	9.18	HMM-based (lower-bound)	1		11	0.9681	2	14.1217	Viruses;Duplodnaviria;Heunggongvirae;Uroviricota;Caudoviricetes	dsDNA	Prokaryote	Duplodnaviria	Heunggongvirae	Uroviricota	Caudoviricetes
SM1000_MG_EukFloat_scaffold_505	SM1000_MG_EukFloat_scaffold_505	MG_eukfloat	yes	14794	No	16	6	0	Low-quality	Genome-fragment	23.03	HMM-based (lower-bound)	1		11	0.968	2	14.5065	Viruses;Duplodnaviria;Heunggongvirae;Uroviricota;Caudoviricetes	dsDNA	Prokaryote	Duplodnaviria	Heunggongvirae	Uroviricota	Caudoviricetes
SM1000_MG_EukFloat_scaffold_509	SM1000_MG_EukFloat_scaffold_509	MG_eukfloat	yes	14766	No	28	4	0	Low-quality	Genome-fragment	12.65	HMM-based (lower-bound)	1		11	0.9629	1	8.2528	Viruses;Duplodnaviria;Heunggongvirae;Uroviricota;Caudoviricetes	dsDNA	Prokaryote	Duplodnaviria	Heunggongvirae	Uroviricota	Caudoviricetes
SM1000_MG_EukFloat_scaffold_51	SM1000_MG_EukFloat_scaffold_51	MG_eukfloat	yes	48796	No	67	5	0	High-quality	High-quality	100	AAI-based (medium-confidence)	1		11	0.9775	1	22.2421	Viruses;Duplodnaviria;Heunggongvirae;Uroviricota;Caudoviricetes	dsDNA	Prokaryote	Duplodnaviria	Heunggongvirae	Uroviricota	Caudoviricetes
SM1000_MG_EukFloat_scaffold_53	SM1000_MG_EukFloat_scaffold_53	MG_eukfloat	yes	48018	No	81	9	0	Medium-quality	Genome-fragment	67.77	HMM-based (lower-bound)	1		11	0.9669	4	23.5888	Viruses;Duplodnaviria;Heunggongvirae;Uroviricota;Caudoviricetes	dsDNA	Prokaryote	Duplodnaviria	Heunggongvirae	Uroviricota	Caudoviricetes
SM1000_MG_EukFloat_scaffold_54	SM1000_MG_EukFloat_scaffold_54	MG_eukfloat	yes	48016	No	65	3	1	Medium-quality	Genome-fragment	60.12	HMM-based (lower-bound)	1		11	0.9469	3	23.4473	Viruses;Duplodnaviria;Heunggongvirae;Uroviricota;Caudoviricetes	dsDNA	Prokaryote	Duplodnaviria	Heunggongvirae	Uroviricota	Caudoviricetes
SM1000_MG_EukFloat_scaffold_541	SM1000_MG_EukFloat_scaffold_541	MG_eukfloat	yes	14459	No	20	2	1	Low-quality	Genome-fragment	22.28	HMM-based (lower-bound)	1		11	0.9651	0	6.8357	Viruses;Duplodnaviria;Heunggongvirae;Uroviricota;Caudoviricetes	dsDNA	Prokaryote	Duplodnaviria	Heunggongvirae	Uroviricota	Caudoviricetes
SM1000_MG_EukFloat_scaffold_544	SM1000_MG_EukFloat_scaffold_544	MG_eukfloat	yes	14400	No	33	7	0	Low-quality	Genome-fragment	27.12	AAI-based (medium-confidence)	1		11	0.9659	1	9.3426	Viruses;Duplodnaviria;Heunggongvirae;Uroviricota;Caudoviricetes	dsDNA	Prokaryote	Duplodnaviria	Heunggongvirae	Uroviricota	Caudoviricetes
SM1000_MG_EukFloat_scaffold_550	SM1000_MG_EukFloat_scaffold_550	MG_eukfloat	yes	14363	No	26	1	1	Low-quality	Genome-fragment	8.59	HMM-based (lower-bound)	1		11	0.9355	0	6.8096	Viruses;Duplodnaviria;Heunggongvirae;Uroviricota;Caudoviricetes	dsDNA	Prokaryote	Duplodnaviria	Heunggongvirae	Uroviricota	Caudoviricetes
SM1000_MG_EukFloat_scaffold_554	SM1000_MG_EukFloat_scaffold_554	MG_eukfloat	yes	14325	No	43	1	0	Low-quality	Genome-fragment	5.17	HMM-based (lower-bound)	1		11	0.9209	0	1.3203	Viruses;Duplodnaviria;Heunggongvirae;Uroviricota;Caudoviricetes	dsDNA	Prokaryote	Duplodnaviria	Heunggongvirae	Uroviricota	Caudoviricetes
SM1000_MG_EukFloat_scaffold_556	SM1000_MG_EukFloat_scaffold_556	MG_eukfloat	yes	14300	No	24	4	1	Low-quality	Genome-fragment	7.14	HMM-based (lower-bound)	1		11	0.9483	0	7.9031	Viruses;Duplodnaviria;Heunggongvirae;Uroviricota;Caudoviricetes	dsDNA	Prokaryote	Duplodnaviria	Heunggongvirae	Uroviricota	Caudoviricetes
SM1000_MG_EukFloat_scaffold_562	SM1000_MG_EukFloat_scaffold_562	MG_eukfloat	yes	14228	No	39	2	0	Low-quality	Genome-fragment	27.05	AAI-based (high-confidence)	1		11	0.9587	0	5.7545	Viruses;Duplodnaviria;Heunggongvirae;Uroviricota;Caudoviricetes	dsDNA	Prokaryote	Duplodnaviria	Heunggongvirae	Uroviricota	Caudoviricetes
SM1000_MG_EukFloat_scaffold_57	SM1000_MG_EukFloat_scaffold_57	MG_eukfloat	yes	47885	No	77	14	0	Complete	High-quality	100	DTR (high-confidence)	1		11	0.9754	8	46.753	Viruses;Duplodnaviria;Heunggongvirae;Uroviricota;Caudoviricetes	dsDNA	Prokaryote	Duplodnaviria	Heunggongvirae	Uroviricota	Caudoviricetes
SM1000_MG_EukFloat_scaffold_570	SM1000_MG_EukFloat_scaffold_570	MG_eukfloat	yes	14144	No	21	2	0	Low-quality	Genome-fragment	9.26	HMM-based (lower-bound)	1		11	0.8679	1	8.0274	Viruses;Duplodnaviria;Heunggongvirae;Uroviricota;Caudoviricetes	dsDNA	Prokaryote	Duplodnaviria	Heunggongvirae	Uroviricota	Caudoviricetes
SM1000_MG_EukFloat_scaffold_571	SM1000_MG_EukFloat_scaffold_571	MG_eukfloat	yes	14139	No	18	8	0	Low-quality	Genome-fragment	27.56	AAI-based (medium-confidence)	1		11	0.9514	4	13.6489	Viruses;Duplodnaviria;Heunggongvirae;Uroviricota;Caudoviricetes	dsDNA	Prokaryote	Duplodnaviria	Heunggongvirae	Uroviricota	Caudoviricetes
SM1000_MG_EukFloat_scaffold_575	SM1000_MG_EukFloat_scaffold_575	MG_eukfloat	yes	14097	No	21	5	1	Low-quality	Genome-fragment	21.83	AAI-based (medium-confidence)	1		11	0.9473	2	7.6783	Viruses;Duplodnaviria;Heunggongvirae;Uroviricota;Caudoviricetes	dsDNA	Prokaryote	Duplodnaviria	Heunggongvirae	Uroviricota	Caudoviricetes
SM1000_MG_EukFloat_scaffold_577	SM1000_MG_EukFloat_scaffold_577	MG_eukfloat	yes	14069	No	31	6	0	Low-quality	Genome-fragment	34.01	AAI-based (medium-confidence)	1		11	0.87	0	6.0633	Viruses;Duplodnaviria;Heunggongvirae;Uroviricota;Caudoviricetes	dsDNA	Prokaryote	Duplodnaviria	Heunggongvirae	Uroviricota	Caudoviricetes
SM1000_MG_EukFloat_scaffold_58	SM1000_MG_EukFloat_scaffold_58	MG_eukfloat	yes	47489	No	69	15	0	Complete	High-quality	100	DTR (high-confidence)	1		11	0.9719	5	46.7717	Viruses;Duplodnaviria;Heunggongvirae;Uroviricota;Caudoviricetes	dsDNA	Prokaryote	Duplodnaviria	Heunggongvirae	Uroviricota	Caudoviricetes
SM1000_MG_EukFloat_scaffold_580	SM1000_MG_EukFloat_scaffold_580	MG_eukfloat	yes	14043	No	19	2	1	Low-quality	Genome-fragment	8.31	AAI-based (medium-confidence)	1		11	0.9725	3	6.3495	Viruses;Duplodnaviria;Heunggongvirae;Uroviricota;Caudoviricetes;Herelleviridae	dsDNA	Prokaryote	Duplodnaviria	Heunggongvirae	Uroviricota	Caudoviricetes		Herelleviridae
SM1000_MG_EukFloat_scaffold_582	SM1000_MG_EukFloat_scaffold_582	MG_eukfloat	yes	14027	No	17	1	0	Low-quality	Genome-fragment	34.86	AAI-based (medium-confidence)	1		11	0.8524	4	14.5337	Viruses;Duplodnaviria;Heunggongvirae;Uroviricota;Caudoviricetes	dsDNA	Prokaryote	Duplodnaviria	Heunggongvirae	Uroviricota	Caudoviricetes
SM1000_MG_EukFloat_scaffold_587	SM1000_MG_EukFloat_scaffold_587	MG_eukfloat	yes	14008	No	32	2	0	Low-quality	Genome-fragment	7.66	HMM-based (lower-bound)	1		11	0.9534	0	7.9547	Viruses;Duplodnaviria;Heunggongvirae;Uroviricota;Caudoviricetes	dsDNA	Prokaryote	Duplodnaviria	Heunggongvirae	Uroviricota	Caudoviricetes
SM1000_MG_EukFloat_scaffold_59	SM1000_MG_EukFloat_scaffold_59	MG_eukfloat	yes	47424	No	73	6	0	High-quality	High-quality	100	AAI-based (medium-confidence)	1		11	0.9811	4	38.2048	Viruses;Duplodnaviria;Heunggongvirae;Uroviricota;Caudoviricetes	dsDNA	Prokaryote	Duplodnaviria	Heunggongvirae	Uroviricota	Caudoviricetes
SM1000_MG_EukFloat_scaffold_6	SM1000_MG_EukFloat_scaffold_6	MG_eukfloat	yes	96170	No	157	8	0	Complete	High-quality	100	DTR (high-confidence)	1		11	0.9692	8	40.7175	Viruses;Duplodnaviria;Heunggongvirae;Uroviricota;Caudoviricetes	dsDNA	Prokaryote	Duplodnaviria	Heunggongvirae	Uroviricota	Caudoviricetes
SM1000_MG_EukFloat_scaffold_60	SM1000_MG_EukFloat_scaffold_60	MG_eukfloat	yes	47222	No	71	12	2	Complete	High-quality	100	DTR (high-confidence)	1		11	0.9658	10	31.1777	Viruses;Duplodnaviria;Heunggongvirae;Uroviricota;Caudoviricetes	dsDNA	Prokaryote	Duplodnaviria	Heunggongvirae	Uroviricota	Caudoviricetes
SM1000_MG_EukFloat_scaffold_603	SM1000_MG_EukFloat_scaffold_603	MG_eukfloat	yes	13849	No	18	4	0	Low-quality	Genome-fragment	9.07	AAI-based (medium-confidence)	1		11	0.9771	0	25.96	Viruses;Duplodnaviria;Heunggongvirae;Uroviricota;Caudoviricetes	dsDNA	Prokaryote	Duplodnaviria	Heunggongvirae	Uroviricota	Caudoviricetes
SM1000_MG_EukFloat_scaffold_604	SM1000_MG_EukFloat_scaffold_604	MG_eukfloat	yes	13839	No	32	2	0	Low-quality	Genome-fragment	30.31	HMM-based (lower-bound)	1		11	0.9768	0	15.3735	Viruses;Duplodnaviria;Heunggongvirae;Uroviricota;Caudoviricetes	dsDNA	Prokaryote	Duplodnaviria	Heunggongvirae	Uroviricota	Caudoviricetes
SM1000_MG_EukFloat_scaffold_607	SM1000_MG_EukFloat_scaffold_607	MG_eukfloat	yes	13829	No	29	5	0	Low-quality	Genome-fragment	31.35	AAI-based (medium-confidence)	1		11	0.9783	2	16.5043	Viruses;Duplodnaviria;Heunggongvirae;Uroviricota;Caudoviricetes	dsDNA	Prokaryote	Duplodnaviria	Heunggongvirae	Uroviricota	Caudoviricetes
SM1000_MG_EukFloat_scaffold_61	SM1000_MG_EukFloat_scaffold_61,SM1002_MG_EukFloat_scaffold_1088,SM1050_MG_EukFloat_scaffold_969,SM1002_MG_EukFloat_scaffold_8863	MG_eukfloat	yes	47215	No	75	10	1	High-quality	High-quality	100	AAI-based (high-confidence)	1		11	0.9751	5	29.9418	Viruses;Duplodnaviria;Heunggongvirae;Uroviricota;Caudoviricetes	dsDNA	Prokaryote	Duplodnaviria	Heunggongvirae	Uroviricota	Caudoviricetes
SM1000_MG_EukFloat_scaffold_612	SM1000_MG_EukFloat_scaffold_612	MG_eukfloat	yes	13748	No	30	1	0	Low-quality	Genome-fragment	19.08	AAI-based (medium-confidence)	1		11	0.9737	0	7.148	Viruses;Duplodnaviria;Heunggongvirae;Uroviricota;Caudoviricetes;Schitoviridae	dsDNA	Prokaryote	Duplodnaviria	Heunggongvirae	Uroviricota	Caudoviricetes		Schitoviridae
SM1000_MG_EukFloat_scaffold_616	SM1000_MG_EukFloat_scaffold_616	MG_eukfloat	yes	13722	No	30	5	0	Low-quality	Genome-fragment	4.4	HMM-based (lower-bound)	1		11	0.9699	2	10.2772	Viruses;Duplodnaviria;Heunggongvirae;Uroviricota;Caudoviricetes	dsDNA	Prokaryote	Duplodnaviria	Heunggongvirae	Uroviricota	Caudoviricetes
SM1000_MG_EukFloat_scaffold_617	SM1000_MG_EukFloat_scaffold_617	MG_eukfloat	yes	13713	No	24	4	1	Low-quality	Genome-fragment	15.66	HMM-based (lower-bound)	1		11	0.9459	0	11.1624	Viruses;Duplodnaviria;Heunggongvirae;Uroviricota;Caudoviricetes	dsDNA	Prokaryote	Duplodnaviria	Heunggongvirae	Uroviricota	Caudoviricetes
SM1000_MG_EukFloat_scaffold_62	SM1000_MG_EukFloat_scaffold_62	MG_eukfloat	yes	47051	No	67	3	0	Complete	High-quality	100	DTR (high-confidence)	1		11	0.9725	3	34.43	Viruses;Duplodnaviria;Heunggongvirae;Uroviricota;Caudoviricetes	dsDNA	Prokaryote	Duplodnaviria	Heunggongvirae	Uroviricota	Caudoviricetes
SM1000_MG_EukFloat_scaffold_623	SM1000_MG_EukFloat_scaffold_623	MG_eukfloat	yes	13635	No	21	4	0	Low-quality	Genome-fragment	21.38	AAI-based (medium-confidence)	1		11	0.9745	3	11.2785	Viruses;Duplodnaviria;Heunggongvirae;Uroviricota;Caudoviricetes	dsDNA	Prokaryote	Duplodnaviria	Heunggongvirae	Uroviricota	Caudoviricetes
SM1000_MG_EukFloat_scaffold_628	SM1000_MG_EukFloat_scaffold_628	MG_eukfloat	yes	13597	No	25	2	1	Low-quality	Genome-fragment	9.66	HMM-based (lower-bound)	1		11	0.9632	0	5.111	Viruses;Duplodnaviria;Heunggongvirae;Uroviricota;Caudoviricetes	dsDNA	Prokaryote	Duplodnaviria	Heunggongvirae	Uroviricota	Caudoviricetes
SM1000_MG_EukFloat_scaffold_630	SM1000_MG_EukFloat_scaffold_630	MG_eukfloat	yes	13575	No	20	3	0	Low-quality	Genome-fragment	12.07	AAI-based (medium-confidence)	1		11	0.9694	0	12.5959	Viruses;Duplodnaviria;Heunggongvirae;Uroviricota;Caudoviricetes	dsDNA	Prokaryote	Duplodnaviria	Heunggongvirae	Uroviricota	Caudoviricetes
SM1000_MG_EukFloat_scaffold_632	SM1000_MG_EukFloat_scaffold_632	MG_eukfloat	yes	13543	No	28	2	0	Low-quality	Genome-fragment	11.76	HMM-based (lower-bound)	1		11	0.8695	0	4.3687	Viruses;Duplodnaviria;Heunggongvirae;Uroviricota;Caudoviricetes	dsDNA	Prokaryote	Duplodnaviria	Heunggongvirae	Uroviricota	Caudoviricetes
SM1000_MG_EukFloat_scaffold_64	SM1000_MG_EukFloat_scaffold_64	MG_eukfloat	yes	45805	No	81	7	1	Complete	High-quality	100	DTR (high-confidence)	1		11	0.962	6	26.8173	Viruses;Duplodnaviria;Heunggongvirae;Uroviricota;Caudoviricetes	dsDNA	Prokaryote	Duplodnaviria	Heunggongvirae	Uroviricota	Caudoviricetes
SM1000_MG_EukFloat_scaffold_645	SM1000_MG_EukFloat_scaffold_645	MG_eukfloat	yes	13395	No	27	1	0	Low-quality	Genome-fragment	25.17	AAI-based (high-confidence)	1		11	0.8832	1	6.7066	Viruses;Duplodnaviria;Heunggongvirae;Uroviricota;Caudoviricetes	dsDNA	Prokaryote	Duplodnaviria	Heunggongvirae	Uroviricota	Caudoviricetes
SM1000_MG_EukFloat_scaffold_65	SM1000_MG_EukFloat_scaffold_65	MG_eukfloat	yes	45630	No	88	19	0	Medium-quality	Genome-fragment	79.93	AAI-based (high-confidence)	1		11	0.956	7	56.7921	Viruses;Duplodnaviria;Heunggongvirae;Uroviricota;Caudoviricetes	dsDNA	Prokaryote	Duplodnaviria	Heunggongvirae	Uroviricota	Caudoviricetes
SM1000_MG_EukFloat_scaffold_66	SM1000_MG_EukFloat_scaffold_66	MG_eukfloat	yes	45615	No	70	13	1	High-quality	High-quality	100	AAI-based (medium-confidence)	1		11	0.953	5	24.5233	Viruses;Duplodnaviria;Heunggongvirae;Uroviricota;Caudoviricetes	dsDNA	Prokaryote	Duplodnaviria	Heunggongvirae	Uroviricota	Caudoviricetes
SM1000_MG_EukFloat_scaffold_665	SM1000_MG_EukFloat_scaffold_665	MG_eukfloat	yes	13259	No	27	3	0	Low-quality	Genome-fragment	21.03	HMM-based (lower-bound)	1		11	0.9445	1	3.5335	Viruses;Duplodnaviria;Heunggongvirae;Uroviricota;Caudoviricetes	dsDNA	Prokaryote	Duplodnaviria	Heunggongvirae	Uroviricota	Caudoviricetes
SM1000_MG_EukFloat_scaffold_672	SM1000_MG_EukFloat_scaffold_672	MG_eukfloat	yes	13192	No	30	1	0	Low-quality	Genome-fragment	8.42	HMM-based (lower-bound)	1		11	0.8909	0	4.009	Viruses;Duplodnaviria;Heunggongvirae;Uroviricota;Caudoviricetes	dsDNA	Prokaryote	Duplodnaviria	Heunggongvirae	Uroviricota	Caudoviricetes
SM1000_MG_EukFloat_scaffold_674	SM1000_MG_EukFloat_scaffold_674	MG_eukfloat	yes	13184	No	22	5	0	Low-quality	Genome-fragment	25.6	AAI-based (medium-confidence)	1		11	0.9791	0	14.7638	Viruses;Duplodnaviria;Heunggongvirae;Uroviricota;Caudoviricetes	dsDNA	Prokaryote	Duplodnaviria	Heunggongvirae	Uroviricota	Caudoviricetes
SM1000_MG_EukFloat_scaffold_675	SM1000_MG_EukFloat_scaffold_675	MG_eukfloat	yes	13174	No	13	2	1	Low-quality	Genome-fragment	27.91	HMM-based (lower-bound)	1		11	0.9686	3	10.9891	Viruses;Duplodnaviria;Heunggongvirae;Uroviricota;Caudoviricetes	dsDNA	Prokaryote	Duplodnaviria	Heunggongvirae	Uroviricota	Caudoviricetes
SM1000_MG_EukFloat_scaffold_676	SM1000_MG_EukFloat_scaffold_676	MG_eukfloat	yes	13168	No	20	5	0	Low-quality	Genome-fragment	25.04	AAI-based (high-confidence)	1		11	0.9815	4	10.4512	Viruses;Duplodnaviria;Heunggongvirae;Uroviricota;Caudoviricetes	dsDNA	Prokaryote	Duplodnaviria	Heunggongvirae	Uroviricota	Caudoviricetes
SM1000_MG_EukFloat_scaffold_677	SM1000_MG_EukFloat_scaffold_677	MG_eukfloat	yes	13165	No	17	1	0	Low-quality	Genome-fragment	27.84	AAI-based (medium-confidence)	1		11	0.9704	2	9.6444	Viruses;Duplodnaviria;Heunggongvirae;Uroviricota;Caudoviricetes	dsDNA	Prokaryote	Duplodnaviria	Heunggongvirae	Uroviricota	Caudoviricetes
SM1000_MG_EukFloat_scaffold_678	SM1000_MG_EukFloat_scaffold_678	MG_eukfloat	yes	13160	No	20	1	0	Low-quality	Genome-fragment	10.08	AAI-based (medium-confidence)	1		11	0.9504	0	3.9263	Viruses;Duplodnaviria;Heunggongvirae;Uroviricota;Caudoviricetes	dsDNA	Prokaryote	Duplodnaviria	Heunggongvirae	Uroviricota	Caudoviricetes
SM1000_MG_EukFloat_scaffold_68	SM1000_MG_EukFloat_scaffold_68,SM1001_MG_EukFloat_scaffold_388,SM1027_MG_EukFloat_scaffold_348	MG_eukfloat	yes	44526	No	83	32	0	High-quality	High-quality	100	AAI-based (medium-confidence)	1.01		11	0.9633	6	52.2416	Viruses;Duplodnaviria;Heunggongvirae;Uroviricota;Caudoviricetes	dsDNA	Prokaryote	Duplodnaviria	Heunggongvirae	Uroviricota	Caudoviricetes
SM1000_MG_EukFloat_scaffold_682	SM1000_MG_EukFloat_scaffold_682	MG_eukfloat	yes	13102	No	31	2	0	Low-quality	Genome-fragment	13.23	HMM-based (lower-bound)	1		11	0.9267	2	5.1038	Viruses;Duplodnaviria;Heunggongvirae;Uroviricota;Caudoviricetes	dsDNA	Prokaryote	Duplodnaviria	Heunggongvirae	Uroviricota	Caudoviricetes
SM1000_MG_EukFloat_scaffold_69	SM1000_MG_EukFloat_scaffold_69	MG_eukfloat	yes	44364	No	84	9	2	Complete	High-quality	100	DTR (high-confidence)	1		11	0.9751	6	50.7113	Viruses;Duplodnaviria;Heunggongvirae;Uroviricota;Caudoviricetes	dsDNA	Prokaryote	Duplodnaviria	Heunggongvirae	Uroviricota	Caudoviricetes
SM1000_MG_EukFloat_scaffold_695	SM1000_MG_EukFloat_scaffold_695	MG_eukfloat	yes	12944	No	29	2	0	Low-quality	Genome-fragment	9.57	AAI-based (medium-confidence)	1		11	0.9719	0	8.3004	Viruses;Duplodnaviria;Heunggongvirae;Uroviricota;Caudoviricetes	dsDNA	Prokaryote	Duplodnaviria	Heunggongvirae	Uroviricota	Caudoviricetes
SM1000_MG_EukFloat_scaffold_699	SM1000_MG_EukFloat_scaffold_699	MG_eukfloat	yes	12899	No	24	3	0	Low-quality	Genome-fragment	21.48	AAI-based (medium-confidence)	1		11	0.9519	1	9.2308	Viruses;Duplodnaviria;Heunggongvirae;Uroviricota;Caudoviricetes	dsDNA	Prokaryote	Duplodnaviria	Heunggongvirae	Uroviricota	Caudoviricetes
SM1000_MG_EukFloat_scaffold_7	SM1000_MG_EukFloat_scaffold_7,SM1003_MG_EukFloat_scaffold_342,SM1003_MG_EukFloat_scaffold_908	MG_eukfloat	yes	89547	No	141	21	3	Medium-quality	Genome-fragment	89.27	HMM-based (lower-bound)	1		11	0.9654	6	63.319	Viruses;Duplodnaviria;Heunggongvirae;Uroviricota;Caudoviricetes	dsDNA	Prokaryote	Duplodnaviria	Heunggongvirae	Uroviricota	Caudoviricetes
SM1000_MG_EukFloat_scaffold_70	SM1000_MG_EukFloat_scaffold_70	MG_eukfloat	yes	44312	No	80	15	0	High-quality	High-quality	100	AAI-based (high-confidence)	1.01		11	0.9784	6	53.4595	Viruses;Duplodnaviria;Heunggongvirae;Uroviricota;Caudoviricetes	dsDNA	Prokaryote	Duplodnaviria	Heunggongvirae	Uroviricota	Caudoviricetes
SM1000_MG_EukFloat_scaffold_709	SM1000_MG_EukFloat_scaffold_709	MG_eukfloat	yes	12791	No	20	1	0	Low-quality	Genome-fragment	6.65	HMM-based (lower-bound)	1		11	0.9769	0	5.2756	Viruses;Duplodnaviria;Heunggongvirae;Uroviricota;Caudoviricetes	dsDNA	Prokaryote	Duplodnaviria	Heunggongvirae	Uroviricota	Caudoviricetes
SM1000_MG_EukFloat_scaffold_71	SM1000_MG_EukFloat_scaffold_71	MG_eukfloat	yes	44185	No	76	4	0	Low-quality	Genome-fragment	40.62	HMM-based (lower-bound)	1		11	0.955	5	21.7126	Viruses;Duplodnaviria;Heunggongvirae;Uroviricota;Caudoviricetes	dsDNA	Prokaryote	Duplodnaviria	Heunggongvirae	Uroviricota	Caudoviricetes
SM1000_MG_EukFloat_scaffold_712	SM1000_MG_EukFloat_scaffold_712	MG_eukfloat	yes	12786	No	20	4	1	Low-quality	Genome-fragment	30.57	AAI-based (high-confidence)	1		11	0.9788	6	19.1473	Viruses;Duplodnaviria;Heunggongvirae;Uroviricota;Caudoviricetes	dsDNA	Prokaryote	Duplodnaviria	Heunggongvirae	Uroviricota	Caudoviricetes
SM1000_MG_EukFloat_scaffold_719	SM1000_MG_EukFloat_scaffold_719	MG_eukfloat	yes	12696	No	25	1	1	Low-quality	Genome-fragment	18.99	HMM-based (lower-bound)	1		11	0.9548	1	12.5481	Viruses;Duplodnaviria;Heunggongvirae;Uroviricota;Caudoviricetes	dsDNA	Prokaryote	Duplodnaviria	Heunggongvirae	Uroviricota	Caudoviricetes
SM1000_MG_EukFloat_scaffold_73	SM1000_MG_EukFloat_scaffold_73	MG_eukfloat	yes	43996	No	77	18	0	Complete	High-quality	100	DTR (high-confidence)	1		11	0.9696	4	46.2759	Viruses;Duplodnaviria;Heunggongvirae;Uroviricota;Caudoviricetes	dsDNA	Prokaryote	Duplodnaviria	Heunggongvirae	Uroviricota	Caudoviricetes
SM1000_MG_EukFloat_scaffold_731	SM1000_MG_EukFloat_scaffold_731	MG_eukfloat	yes	12604	No	19	7	0	Low-quality	Genome-fragment	41.67	AAI-based (medium-confidence)	1		11	0.9807	4	12.4713	Viruses;Duplodnaviria;Heunggongvirae;Uroviricota;Caudoviricetes	dsDNA	Prokaryote	Duplodnaviria	Heunggongvirae	Uroviricota	Caudoviricetes
SM1000_MG_EukFloat_scaffold_735	SM1000_MG_EukFloat_scaffold_735	MG_eukfloat	yes	12563	No	14	3	0	Low-quality	Genome-fragment	30.04	AAI-based (medium-confidence)	1		11	0.9776	2	10.9238	Viruses;Duplodnaviria;Heunggongvirae;Uroviricota;Caudoviricetes	dsDNA	Prokaryote	Duplodnaviria	Heunggongvirae	Uroviricota	Caudoviricetes
SM1000_MG_EukFloat_scaffold_736	SM1000_MG_EukFloat_scaffold_736	MG_eukfloat	yes	12554	No	30	8	0	Low-quality	Genome-fragment	28.54	AAI-based (high-confidence)	1		11	0.9622	3	15.8844	Viruses;Duplodnaviria;Heunggongvirae;Uroviricota;Caudoviricetes	dsDNA	Prokaryote	Duplodnaviria	Heunggongvirae	Uroviricota	Caudoviricetes
SM1000_MG_EukFloat_scaffold_744	SM1000_MG_EukFloat_scaffold_744	MG_eukfloat	yes	12524	No	27	1	0	Low-quality	Genome-fragment	8.01	HMM-based (lower-bound)	1		11	0.9777	1	10.16	Viruses;Duplodnaviria;Heunggongvirae;Uroviricota;Caudoviricetes	dsDNA	Prokaryote	Duplodnaviria	Heunggongvirae	Uroviricota	Caudoviricetes
SM1000_MG_EukFloat_scaffold_745	SM1000_MG_EukFloat_scaffold_745	MG_eukfloat	yes	12522	No	20	4	0	Low-quality	Genome-fragment	18.99	HMM-based (lower-bound)	1		11	0.9396	0	11.9124	Viruses;Duplodnaviria;Heunggongvirae;Uroviricota;Caudoviricetes	dsDNA	Prokaryote	Duplodnaviria	Heunggongvirae	Uroviricota	Caudoviricetes
SM1000_MG_EukFloat_scaffold_755	SM1000_MG_EukFloat_scaffold_755	MG_eukfloat	yes	12473	No	16	1	1	Low-quality	Genome-fragment	25.3	AAI-based (medium-confidence)	1		11	0.9791	0	15.1519	Viruses;Duplodnaviria;Heunggongvirae;Uroviricota;Caudoviricetes	dsDNA	Prokaryote	Duplodnaviria	Heunggongvirae	Uroviricota	Caudoviricetes
SM1000_MG_EukFloat_scaffold_759	SM1000_MG_EukFloat_scaffold_759	MG_eukfloat	yes	12445	No	30	2	0	Low-quality	Genome-fragment	9.93	HMM-based (lower-bound)	1		11	0.9326	0	10.2085	Viruses;Duplodnaviria;Heunggongvirae;Uroviricota;Caudoviricetes	dsDNA	Prokaryote	Duplodnaviria	Heunggongvirae	Uroviricota	Caudoviricetes
SM1000_MG_EukFloat_scaffold_76	SM1000_MG_EukFloat_scaffold_76	MG_eukfloat	yes	43509	No	84	18	1	High-quality	High-quality	100	AAI-based (high-confidence)	1		11	0.9685	7	59.2643	Viruses;Duplodnaviria;Heunggongvirae;Uroviricota;Caudoviricetes	dsDNA	Prokaryote	Duplodnaviria	Heunggongvirae	Uroviricota	Caudoviricetes
SM1000_MG_EukFloat_scaffold_762	SM1000_MG_EukFloat_scaffold_762	MG_eukfloat	yes	12415	No	18	5	0	Low-quality	Genome-fragment	19.1	AAI-based (high-confidence)	1		11	0.9793	4	12.3161	Viruses;Duplodnaviria;Heunggongvirae;Uroviricota;Caudoviricetes	dsDNA	Prokaryote	Duplodnaviria	Heunggongvirae	Uroviricota	Caudoviricetes
SM1000_MG_EukFloat_scaffold_764	SM1000_MG_EukFloat_scaffold_764	MG_eukfloat	yes	12370	No	15	7	0	Low-quality	Genome-fragment	17.73	AAI-based (medium-confidence)	1		11	0.976	5	15.9315	Viruses;Duplodnaviria;Heunggongvirae;Uroviricota;Caudoviricetes	dsDNA	Prokaryote	Duplodnaviria	Heunggongvirae	Uroviricota	Caudoviricetes
SM1000_MG_EukFloat_scaffold_769	SM1000_MG_EukFloat_scaffold_769	MG_eukfloat	yes	12328	No	17	2	0	Low-quality	Genome-fragment	31.15	AAI-based (medium-confidence)	1		11	0.9602	1	14.6609	Viruses;Duplodnaviria;Heunggongvirae;Uroviricota;Caudoviricetes	dsDNA	Prokaryote	Duplodnaviria	Heunggongvirae	Uroviricota	Caudoviricetes
SM1000_MG_EukFloat_scaffold_77	SM1000_MG_EukFloat_scaffold_77	MG_eukfloat	yes	43419	No	73	13	0	High-quality	High-quality	100	AAI-based (medium-confidence)	1		11	0.9548	6	40.758	Viruses;Duplodnaviria;Heunggongvirae;Uroviricota;Caudoviricetes	dsDNA	Prokaryote	Duplodnaviria	Heunggongvirae	Uroviricota	Caudoviricetes
SM1000_MG_EukFloat_scaffold_78	SM1000_MG_EukFloat_scaffold_78	MG_eukfloat	yes	43242	No	65	13	0	High-quality	High-quality	95.83	AAI-based (medium-confidence)	1		11	0.9771	6	38.2698	Viruses;Duplodnaviria;Heunggongvirae;Uroviricota;Caudoviricetes	dsDNA	Prokaryote	Duplodnaviria	Heunggongvirae	Uroviricota	Caudoviricetes
SM1000_MG_EukFloat_scaffold_782	SM1000_MG_EukFloat_scaffold_782	MG_eukfloat	yes	12215	No	22	3	1	Low-quality	Genome-fragment	13.11	HMM-based (lower-bound)	1		11	0.9713	2	11.8178	Viruses;Duplodnaviria;Heunggongvirae;Uroviricota;Caudoviricetes	dsDNA	Prokaryote	Duplodnaviria	Heunggongvirae	Uroviricota	Caudoviricetes
SM1000_MG_EukFloat_scaffold_783	SM1000_MG_EukFloat_scaffold_783	MG_eukfloat	yes	12192	No	31	2	0	Low-quality	Genome-fragment	11.08	HMM-based (lower-bound)	1		11	0.9768	0	16.3175	Viruses;Duplodnaviria;Heunggongvirae;Uroviricota;Caudoviricetes	dsDNA	Prokaryote	Duplodnaviria	Heunggongvirae	Uroviricota	Caudoviricetes
SM1000_MG_EukFloat_scaffold_784	SM1000_MG_EukFloat_scaffold_784	MG_eukfloat	yes	12186	No	25	2	0	Low-quality	Genome-fragment	6.57	HMM-based (lower-bound)	1		11	0.9183	2	4.7078	Viruses;Duplodnaviria;Heunggongvirae;Uroviricota;Caudoviricetes	dsDNA	Prokaryote	Duplodnaviria	Heunggongvirae	Uroviricota	Caudoviricetes
SM1000_MG_EukFloat_scaffold_794	SM1000_MG_EukFloat_scaffold_794	MG_eukfloat	yes	12084	No	28	4	0	Low-quality	Genome-fragment	15.89	HMM-based (lower-bound)	1		11	0.9753	0	6.6907	Viruses;Duplodnaviria;Heunggongvirae;Uroviricota;Caudoviricetes	dsDNA	Prokaryote	Duplodnaviria	Heunggongvirae	Uroviricota	Caudoviricetes
SM1000_MG_EukFloat_scaffold_797	SM1000_MG_EukFloat_scaffold_797	MG_eukfloat	yes	12071	No	22	2	1	Low-quality	Genome-fragment	11.31	AAI-based (medium-confidence)	1		11	0.9711	0	11.9226	Viruses;Duplodnaviria;Heunggongvirae;Uroviricota;Caudoviricetes	dsDNA	Prokaryote	Duplodnaviria	Heunggongvirae	Uroviricota	Caudoviricetes
SM1000_MG_EukFloat_scaffold_8	SM1000_MG_EukFloat_scaffold_8	MG_eukfloat	yes	83418	No	132	25	2	Complete	High-quality	100	DTR (high-confidence)	1		11	0.9667	7	57.4751	Viruses;Duplodnaviria;Heunggongvirae;Uroviricota;Caudoviricetes	dsDNA	Prokaryote	Duplodnaviria	Heunggongvirae	Uroviricota	Caudoviricetes
SM1000_MG_EukFloat_scaffold_80	SM1000_MG_EukFloat_scaffold_80,SM1001_MG_EukFloat_scaffold_1037,SM1002_MG_EukFloat_scaffold_2637,SM1002_MG_EukFloat_scaffold_6426,SM1002_MG_EukFloat_scaffold_5669	MG_eukfloat	yes	43156	No	64	7	0	Medium-quality	Genome-fragment	80.33	HMM-based (lower-bound)	1		11	0.9775	4	40.7602	Viruses;Duplodnaviria;Heunggongvirae;Uroviricota;Caudoviricetes	dsDNA	Prokaryote	Duplodnaviria	Heunggongvirae	Uroviricota	Caudoviricetes
SM1000_MG_EukFloat_scaffold_800	SM1000_MG_EukFloat_scaffold_800	MG_eukfloat	yes	12062	No	19	1	0	Low-quality	Genome-fragment	24.42	AAI-based (medium-confidence)	1		11	0.9593	2	3.0786	Viruses;Duplodnaviria;Heunggongvirae;Uroviricota;Caudoviricetes	dsDNA	Prokaryote	Duplodnaviria	Heunggongvirae	Uroviricota	Caudoviricetes
SM1000_MG_EukFloat_scaffold_808	SM1000_MG_EukFloat_scaffold_808	MG_eukfloat	yes	12014	No	13	10	0	Low-quality	Genome-fragment	23.76	AAI-based (medium-confidence)	1		11	0.9818	4	19.2267	Viruses;Duplodnaviria;Heunggongvirae;Uroviricota;Caudoviricetes	dsDNA	Prokaryote	Duplodnaviria	Heunggongvirae	Uroviricota	Caudoviricetes
SM1000_MG_EukFloat_scaffold_81	SM1000_MG_EukFloat_scaffold_81	MG_eukfloat	yes	42908	No	55	5	0	High-quality	High-quality	100	AAI-based (high-confidence)	1.01		11	0.9617	5	28.7097	Viruses;Duplodnaviria;Heunggongvirae;Uroviricota;Caudoviricetes	dsDNA	Prokaryote	Duplodnaviria	Heunggongvirae	Uroviricota	Caudoviricetes
SM1000_MG_EukFloat_scaffold_810	SM1000_MG_EukFloat_scaffold_810	MG_eukfloat	yes	12012	No	28	4	0	Low-quality	Genome-fragment	5.98	HMM-based (lower-bound)	1		11	0.9568	1	12.0503	Viruses;Duplodnaviria;Heunggongvirae;Uroviricota;Caudoviricetes	dsDNA	Prokaryote	Duplodnaviria	Heunggongvirae	Uroviricota	Caudoviricetes
SM1000_MG_EukFloat_scaffold_816	SM1000_MG_EukFloat_scaffold_816	MG_eukfloat	yes	11974	No	11	2	0	Low-quality	Genome-fragment	25.68	AAI-based (medium-confidence)	1		11	0.9813	2	8.5161	Viruses;Duplodnaviria;Heunggongvirae;Uroviricota;Caudoviricetes	dsDNA	Prokaryote	Duplodnaviria	Heunggongvirae	Uroviricota	Caudoviricetes
SM1000_MG_EukFloat_scaffold_817	SM1000_MG_EukFloat_scaffold_817	MG_eukfloat	yes	11973	No	14	1	0	Low-quality	Genome-fragment	7.83	AAI-based (medium-confidence)	1		11	0.9672	1	19.8802	Viruses;Duplodnaviria;Heunggongvirae;Uroviricota;Caudoviricetes	dsDNA	Prokaryote	Duplodnaviria	Heunggongvirae	Uroviricota	Caudoviricetes
SM1000_MG_EukFloat_scaffold_819	SM1000_MG_EukFloat_scaffold_819	MG_eukfloat	yes	11963	No	12	4	0	Low-quality	Genome-fragment	22.16	HMM-based (lower-bound)	1		11	0.9819	0	13.3063	Viruses;Duplodnaviria;Heunggongvirae;Uroviricota;Caudoviricetes;Zobellviridae	dsDNA	Prokaryote	Duplodnaviria	Heunggongvirae	Uroviricota	Caudoviricetes		Zobellviridae
SM1000_MG_EukFloat_scaffold_82	SM1000_MG_EukFloat_scaffold_82	MG_eukfloat	yes	42816	No	77	6	0	Low-quality	Genome-fragment	43.88	HMM-based (lower-bound)	1		11	0.9596	4	26.0661	Viruses;Duplodnaviria;Heunggongvirae;Uroviricota;Caudoviricetes	dsDNA	Prokaryote	Duplodnaviria	Heunggongvirae	Uroviricota	Caudoviricetes
SM1000_MG_EukFloat_scaffold_821	SM1000_MG_EukFloat_scaffold_821	MG_eukfloat	yes	11945	No	14	3	1	Low-quality	Genome-fragment	25.03	AAI-based (high-confidence)	1		11	0.9807	1	13.2409	Viruses;Duplodnaviria;Heunggongvirae;Uroviricota;Caudoviricetes	dsDNA	Prokaryote	Duplodnaviria	Heunggongvirae	Uroviricota	Caudoviricetes
SM1000_MG_EukFloat_scaffold_822	SM1000_MG_EukFloat_scaffold_822	MG_eukfloat	yes	11928	No	16	1	1	Low-quality	Genome-fragment	6.75	AAI-based (medium-confidence)	1		11	0.9635	0	4.1294	Viruses;Duplodnaviria;Heunggongvirae;Uroviricota;Caudoviricetes	dsDNA	Prokaryote	Duplodnaviria	Heunggongvirae	Uroviricota	Caudoviricetes
SM1000_MG_EukFloat_scaffold_825	SM1000_MG_EukFloat_scaffold_825	MG_eukfloat	yes	11924	No	28	2	0	Low-quality	Genome-fragment	18.78	HMM-based (lower-bound)	1.01		11	0.9626	0	12.354	Viruses;Duplodnaviria;Heunggongvirae;Uroviricota;Caudoviricetes	dsDNA	Prokaryote	Duplodnaviria	Heunggongvirae	Uroviricota	Caudoviricetes
SM1000_MG_EukFloat_scaffold_83	SM1000_MG_EukFloat_scaffold_83	MG_eukfloat	yes	42786	No	54	16	0	Complete	High-quality	100	DTR (high-confidence)	1		11	0.978	4	44.2808	Viruses;Duplodnaviria;Heunggongvirae;Uroviricota;Caudoviricetes	dsDNA	Prokaryote	Duplodnaviria	Heunggongvirae	Uroviricota	Caudoviricetes
SM1000_MG_EukFloat_scaffold_834	SM1000_MG_EukFloat_scaffold_834	MG_eukfloat	yes	11894	No	18	1	0	Low-quality	Genome-fragment	9.78	HMM-based (lower-bound)	1		11	0.9774	0	7.1834	Viruses;Duplodnaviria;Heunggongvirae;Uroviricota;Caudoviricetes	dsDNA	Prokaryote	Duplodnaviria	Heunggongvirae	Uroviricota	Caudoviricetes
SM1000_MG_EukFloat_scaffold_836	SM1000_MG_EukFloat_scaffold_836	MG_eukfloat	yes	11865	No	19	2	0	Low-quality	Genome-fragment	16.66	HMM-based (lower-bound)	1		11	0.9015	0	9.509	Viruses;Duplodnaviria;Heunggongvirae;Uroviricota;Caudoviricetes	dsDNA	Prokaryote	Duplodnaviria	Heunggongvirae	Uroviricota	Caudoviricetes
SM1000_MG_EukFloat_scaffold_837	SM1000_MG_EukFloat_scaffold_837	MG_eukfloat	yes	11864	No	10	4	0	Low-quality	Genome-fragment	11.76	HMM-based (lower-bound)	1		11	0.9758	0	8.5914	Viruses;Duplodnaviria;Heunggongvirae;Uroviricota;Caudoviricetes;Crassvirales	dsDNA	Prokaryote	Duplodnaviria	Heunggongvirae	Uroviricota	Caudoviricetes	Crassvirales
SM1000_MG_EukFloat_scaffold_839	SM1000_MG_EukFloat_scaffold_839	MG_eukfloat	yes	11856	No	21	4	0	Low-quality	Genome-fragment	6.97	HMM-based (lower-bound)	1		11	0.9533	0	9.1232	Viruses;Duplodnaviria;Heunggongvirae;Uroviricota;Caudoviricetes	dsDNA	Prokaryote	Duplodnaviria	Heunggongvirae	Uroviricota	Caudoviricetes
SM1000_MG_EukFloat_scaffold_84	SM1000_MG_EukFloat_scaffold_84	MG_eukfloat	yes	42541	No	64	13	0	High-quality	High-quality	100	AAI-based (medium-confidence)	1		11	0.9636	6	29.8459	Viruses;Duplodnaviria;Heunggongvirae;Uroviricota;Caudoviricetes	dsDNA	Prokaryote	Duplodnaviria	Heunggongvirae	Uroviricota	Caudoviricetes
SM1000_MG_EukFloat_scaffold_841	SM1000_MG_EukFloat_scaffold_841	MG_eukfloat	yes	11842	No	26	8	0	Low-quality	Genome-fragment	14.4	HMM-based (lower-bound)	1		11	0.9704	0	11.7295	Viruses;Duplodnaviria;Heunggongvirae;Uroviricota;Caudoviricetes	dsDNA	Prokaryote	Duplodnaviria	Heunggongvirae	Uroviricota	Caudoviricetes
SM1000_MG_EukFloat_scaffold_85	SM1000_MG_EukFloat_scaffold_85	MG_eukfloat	yes	42099	No	70	21	0	Medium-quality	Genome-fragment	62.67	HMM-based (lower-bound)	1		11	0.9768	15	51.3828	Viruses;Duplodnaviria;Heunggongvirae;Uroviricota;Caudoviricetes	dsDNA	Prokaryote	Duplodnaviria	Heunggongvirae	Uroviricota	Caudoviricetes
SM1000_MG_EukFloat_scaffold_86	SM1000_MG_EukFloat_scaffold_86	MG_eukfloat	yes	42074	No	62	7	0	Complete	High-quality	100	DTR (high-confidence)	1		11	0.9715	4	32.1455	Viruses;Duplodnaviria;Heunggongvirae;Uroviricota;Caudoviricetes	dsDNA	Prokaryote	Duplodnaviria	Heunggongvirae	Uroviricota	Caudoviricetes
SM1000_MG_EukFloat_scaffold_860	SM1000_MG_EukFloat_scaffold_860	MG_eukfloat	yes	11679	No	22	2	0	Low-quality	Genome-fragment	13.31	HMM-based (lower-bound)	1		11	0.9423	1	6.4536	Viruses;Duplodnaviria;Heunggongvirae;Uroviricota;Caudoviricetes	dsDNA	Prokaryote	Duplodnaviria	Heunggongvirae	Uroviricota	Caudoviricetes
SM1000_MG_EukFloat_scaffold_861	SM1000_MG_EukFloat_scaffold_861	MG_eukfloat	yes	11665	No	18	6	0	Low-quality	Genome-fragment	25.17	AAI-based (high-confidence)	1		11	0.9816	2	15.325	Viruses;Duplodnaviria;Heunggongvirae;Uroviricota;Caudoviricetes	dsDNA	Prokaryote	Duplodnaviria	Heunggongvirae	Uroviricota	Caudoviricetes
SM1000_MG_EukFloat_scaffold_863	SM1000_MG_EukFloat_scaffold_863	MG_eukfloat	yes	11661	No	6	2	0	Low-quality	Genome-fragment	7.27	HMM-based (lower-bound)	1		15	0.9715	1	2.898	Viruses;Duplodnaviria;Heunggongvirae;Uroviricota;Caudoviricetes	dsDNA	Prokaryote	Duplodnaviria	Heunggongvirae	Uroviricota	Caudoviricetes
SM1000_MG_EukFloat_scaffold_87	SM1000_MG_EukFloat_scaffold_87,SM1050_MG_EukFloat_scaffold_976,SM1026_MG_EukFloat_scaffold_252,SM1028_MG_EukFloat_scaffold_4841,SM1028_MG_EukFloat_scaffold_11419	MG_eukfloat	yes	42043	No	66	15	1	High-quality	High-quality	99.69	AAI-based (high-confidence)	1		11	0.9679	5	43.442	Viruses;Duplodnaviria;Heunggongvirae;Uroviricota;Caudoviricetes	dsDNA	Prokaryote	Duplodnaviria	Heunggongvirae	Uroviricota	Caudoviricetes
SM1000_MG_EukFloat_scaffold_874	SM1000_MG_EukFloat_scaffold_874	MG_eukfloat	yes	11604	No	10	4	0	Low-quality	Genome-fragment	12.32	AAI-based (high-confidence)	1		11	0.9755	3	14.6905	Viruses;Duplodnaviria;Heunggongvirae;Uroviricota;Caudoviricetes	dsDNA	Prokaryote	Duplodnaviria	Heunggongvirae	Uroviricota	Caudoviricetes
SM1000_MG_EukFloat_scaffold_879	SM1000_MG_EukFloat_scaffold_879	MG_eukfloat	yes	11585	No	14	4	0	Low-quality	Genome-fragment	12.08	AAI-based (medium-confidence)	1		11	0.9791	2	15.3523	Viruses;Duplodnaviria;Heunggongvirae;Uroviricota;Caudoviricetes	dsDNA	Prokaryote	Duplodnaviria	Heunggongvirae	Uroviricota	Caudoviricetes
SM1000_MG_EukFloat_scaffold_88_1|8045-41885/41885	SM1000_MG_EukFloat_scaffold_88_1|8045-41885/41885	MG_eukfloat	yes	33841	Yes	59	6	0	Medium-quality	Genome-fragment	81.13	AAI-based (medium-confidence)	1	8045-41885	11	0.9714	4	19.7198	Viruses;Duplodnaviria;Heunggongvirae;Uroviricota;Caudoviricetes	dsDNA	Prokaryote	Duplodnaviria	Heunggongvirae	Uroviricota	Caudoviricetes
SM1000_MG_EukFloat_scaffold_89	SM1000_MG_EukFloat_scaffold_89	MG_eukfloat	yes	41877	No	66	17	0	Medium-quality	Genome-fragment	74.34	HMM-based (lower-bound)	1		11	0.9649	5	42.6395	Viruses;Duplodnaviria;Heunggongvirae;Uroviricota;Caudoviricetes	dsDNA	Prokaryote	Duplodnaviria	Heunggongvirae	Uroviricota	Caudoviricetes
SM1000_MG_EukFloat_scaffold_9	SM1000_MG_EukFloat_scaffold_9	MG_eukfloat	yes	81444	No	129	15	1	Complete	High-quality	100	DTR (high-confidence)	1		11	0.9745	11	84.0883	Viruses;Duplodnaviria;Heunggongvirae;Uroviricota;Caudoviricetes	dsDNA	Prokaryote	Duplodnaviria	Heunggongvirae	Uroviricota	Caudoviricetes
SM1000_MG_EukFloat_scaffold_90	SM1000_MG_EukFloat_scaffold_90,SM1005_MG_EukFloat_scaffold_2275	MG_eukfloat	yes	41712	No	65	11	0	Low-quality	Genome-fragment	44.68	HMM-based (lower-bound)	1		11	0.9766	8	33.0456	Viruses;Duplodnaviria;Heunggongvirae;Uroviricota;Caudoviricetes	dsDNA	Prokaryote	Duplodnaviria	Heunggongvirae	Uroviricota	Caudoviricetes
SM1000_MG_EukFloat_scaffold_900	SM1000_MG_EukFloat_scaffold_900	MG_eukfloat	yes	11464	No	19	1	0	Low-quality	Genome-fragment	17.35	HMM-based (lower-bound)	1		11	0.9086	0	4.3196	Viruses;Duplodnaviria;Heunggongvirae;Uroviricota;Caudoviricetes	dsDNA	Prokaryote	Duplodnaviria	Heunggongvirae	Uroviricota	Caudoviricetes
SM1000_MG_EukFloat_scaffold_91	SM1000_MG_EukFloat_scaffold_91	MG_eukfloat	yes	41606	No	64	17	1	Medium-quality	Genome-fragment	89.24	AAI-based (high-confidence)	1		11	0.9435	9	41.089	Viruses;Duplodnaviria;Heunggongvirae;Uroviricota;Caudoviricetes	dsDNA	Prokaryote	Duplodnaviria	Heunggongvirae	Uroviricota	Caudoviricetes
SM1000_MG_EukFloat_scaffold_914	SM1000_MG_EukFloat_scaffold_914	MG_eukfloat	yes	11371	No	30	4	0	Low-quality	Genome-fragment	13.82	HMM-based (lower-bound)	1		11	0.9455	1	6.2947	Viruses;Duplodnaviria;Heunggongvirae;Uroviricota;Caudoviricetes	dsDNA	Prokaryote	Duplodnaviria	Heunggongvirae	Uroviricota	Caudoviricetes
SM1000_MG_EukFloat_scaffold_93	SM1000_MG_EukFloat_scaffold_93	MG_eukfloat	yes	41380	No	75	12	3	Medium-quality	Genome-fragment	55.51	HMM-based (lower-bound)	1		11	0.9743	6	40.9271	Viruses;Duplodnaviria;Heunggongvirae;Uroviricota;Caudoviricetes	dsDNA	Prokaryote	Duplodnaviria	Heunggongvirae	Uroviricota	Caudoviricetes
SM1000_MG_EukFloat_scaffold_937	SM1000_MG_EukFloat_scaffold_937	MG_eukfloat	yes	11194	No	17	1	0	Low-quality	Genome-fragment	6.02	AAI-based (medium-confidence)	1		11	0.9636	0	9.5785	Viruses;Duplodnaviria;Heunggongvirae;Uroviricota;Caudoviricetes	dsDNA	Prokaryote	Duplodnaviria	Heunggongvirae	Uroviricota	Caudoviricetes
SM1000_MG_EukFloat_scaffold_94	SM1000_MG_EukFloat_scaffold_94	MG_eukfloat	yes	41261	No	65	17	0	High-quality	High-quality	95.82	AAI-based (high-confidence)	1		11	0.9789	4	38.6596	Viruses;Duplodnaviria;Heunggongvirae;Uroviricota;Caudoviricetes	dsDNA	Prokaryote	Duplodnaviria	Heunggongvirae	Uroviricota	Caudoviricetes
SM1000_MG_EukFloat_scaffold_948	SM1000_MG_EukFloat_scaffold_948	MG_eukfloat	yes	11156	No	24	1	0	Low-quality	Genome-fragment	7.12	HMM-based (lower-bound)	1		11	0.9312	0	6.0955	Viruses;Duplodnaviria;Heunggongvirae;Uroviricota;Caudoviricetes	dsDNA	Prokaryote	Duplodnaviria	Heunggongvirae	Uroviricota	Caudoviricetes
SM1000_MG_EukFloat_scaffold_949	SM1000_MG_EukFloat_scaffold_949	MG_eukfloat	yes	11153	No	12	3	0	Medium-quality	Genome-fragment	57.75	AAI-based (medium-confidence)	1		11	0.9794	3	8.5914	Viruses;Duplodnaviria;Heunggongvirae;Uroviricota;Caudoviricetes	dsDNA	Prokaryote	Duplodnaviria	Heunggongvirae	Uroviricota	Caudoviricetes
SM1000_MG_EukFloat_scaffold_95	SM1000_MG_EukFloat_scaffold_95	MG_eukfloat	yes	41168	No	81	18	1	Low-quality	Genome-fragment	47.66	HMM-based (lower-bound)	1		11	0.964	8	55.2349	Viruses;Duplodnaviria;Heunggongvirae;Uroviricota;Caudoviricetes	dsDNA	Prokaryote	Duplodnaviria	Heunggongvirae	Uroviricota	Caudoviricetes
SM1000_MG_EukFloat_scaffold_956	SM1000_MG_EukFloat_scaffold_956	MG_eukfloat	yes	11142	No	14	5	1	Low-quality	Genome-fragment	28.59	AAI-based (medium-confidence)	1		11	0.9813	2	17.9044	Viruses;Duplodnaviria;Heunggongvirae;Uroviricota;Caudoviricetes	dsDNA	Prokaryote	Duplodnaviria	Heunggongvirae	Uroviricota	Caudoviricetes
SM1000_MG_EukFloat_scaffold_96	SM1000_MG_EukFloat_scaffold_96	MG_eukfloat	yes	41143	No	59	3	1	Complete	High-quality	100	DTR (high-confidence)	1		11	0.9443	6	24.0894	Viruses;Duplodnaviria;Heunggongvirae;Uroviricota;Caudoviricetes	dsDNA	Prokaryote	Duplodnaviria	Heunggongvirae	Uroviricota	Caudoviricetes
SM1000_MG_EukFloat_scaffold_967	SM1000_MG_EukFloat_scaffold_967	MG_eukfloat	yes	11075	No	13	6	0	Low-quality	Genome-fragment	6.55	AAI-based (high-confidence)	1		11	0.9702	1	7.8247	Viruses;Duplodnaviria;Heunggongvirae;Uroviricota;Caudoviricetes;Herelleviridae	dsDNA	Prokaryote	Duplodnaviria	Heunggongvirae	Uroviricota	Caudoviricetes		Herelleviridae
SM1000_MG_EukFloat_scaffold_97	SM1000_MG_EukFloat_scaffold_97	MG_eukfloat	yes	41073	No	73	8	0	Complete	High-quality	100	DTR (medium-confidence)	1		11	0.9654	6	39.444	Viruses;Duplodnaviria;Heunggongvirae;Uroviricota;Caudoviricetes	dsDNA	Prokaryote	Duplodnaviria	Heunggongvirae	Uroviricota	Caudoviricetes
SM1000_MG_EukFloat_scaffold_975	SM1000_MG_EukFloat_scaffold_975	MG_eukfloat	yes	11035	No	16	3	0	Low-quality	Genome-fragment	18.55	AAI-based (high-confidence)	1		11	0.9741	1	9.4976	Viruses;Duplodnaviria;Heunggongvirae;Uroviricota;Caudoviricetes	dsDNA	Prokaryote	Duplodnaviria	Heunggongvirae	Uroviricota	Caudoviricetes
SM1000_MG_EukFloat_scaffold_98	SM1000_MG_EukFloat_scaffold_98	MG_eukfloat	yes	40979	No	72	8	0	Low-quality	Genome-fragment	43.93	HMM-based (lower-bound)	1		11	0.9646	5	36.085	Viruses;Duplodnaviria;Heunggongvirae;Uroviricota;Caudoviricetes	dsDNA	Prokaryote	Duplodnaviria	Heunggongvirae	Uroviricota	Caudoviricetes
SM1000_MG_EukFloat_scaffold_984	SM1000_MG_EukFloat_scaffold_984	MG_eukfloat	yes	11009	No	9	2	0	Low-quality	Genome-fragment	23.32	AAI-based (medium-confidence)	1		11	0.9715	0	6.4182	Viruses;Duplodnaviria;Heunggongvirae;Uroviricota;Caudoviricetes	dsDNA	Prokaryote	Duplodnaviria	Heunggongvirae	Uroviricota	Caudoviricetes
SM1000_MG_EukFloat_scaffold_99	SM1000_MG_EukFloat_scaffold_99,SM1002_MG_EukFloat_scaffold_3443	MG_eukfloat	yes	40521	No	62	14	0	Complete	High-quality	100	DTR (high-confidence)	1		11	0.9689	6	32.3515	Viruses;Duplodnaviria;Heunggongvirae;Uroviricota;Caudoviricetes	dsDNA	Prokaryote	Duplodnaviria	Heunggongvirae	Uroviricota	Caudoviricetes
SM1000_MG_EukFloat_scaffold_994	SM1000_MG_EukFloat_scaffold_994	MG_eukfloat	yes	10943	No	15	5	3	Low-quality	Genome-fragment	15.35	AAI-based (medium-confidence)	1		11	0.9654	4	12.7258	Viruses;Duplodnaviria;Heunggongvirae;Uroviricota;Caudoviricetes	dsDNA	Prokaryote	Duplodnaviria	Heunggongvirae	Uroviricota	Caudoviricetes
SM1000_MG_virome_scaffold_1_c1|provirus_19_376474	SM1000_MG_virome_scaffold_1_c1|provirus_19_376474	MG_virome	yes	376456	Yes	537	53	25	High-quality	High-quality	96.1	HMM-based (lower-bound)	1	19-376474	11	0.9603	16	235.851	Viruses;Duplodnaviria;Heunggongvirae;Uroviricota;Caudoviricetes	dsDNA	Prokaryote	Duplodnaviria	Heunggongvirae	Uroviricota	Caudoviricetes
SM1000_MG_virome_scaffold_1_c1|provirus_392785_554078_1|1-158889/161294	SM1000_MG_virome_scaffold_1_c1|provirus_392785_554078_1|1-158889/161294	MG_virome	yes	158889	Yes	320	14	9	Medium-quality	Genome-fragment	59.35	HMM-based (lower-bound)	1	1-158889	11	0.9624	2	50.5375	Viruses;Duplodnaviria;Heunggongvirae;Uroviricota;Caudoviricetes	dsDNA	Prokaryote	Duplodnaviria	Heunggongvirae	Uroviricota	Caudoviricetes
SM1000_MG_virome_scaffold_1_c1|provirus_566362_589618	SM1000_MG_virome_scaffold_1_c1|provirus_566362_589618	MG_virome	yes	23257	Yes	33	4	3	Low-quality	Genome-fragment	6.9	AAI-based (medium-confidence)	1	566362-589618	11	0.9534	1	17.9978	Viruses;Duplodnaviria;Heunggongvirae;Uroviricota;Caudoviricetes	dsDNA	Prokaryote	Duplodnaviria	Heunggongvirae	Uroviricota	Caudoviricetes
SM1000_MG_virome_scaffold_10_c3	SM1000_MG_virome_scaffold_10_c3,SM1005_MG_virome_scaffold_468_c4,SM1005_MG_virome_scaffold_1503_c1,SM1005_MG_virome_scaffold_3036_c1,SM1005_MG_virome_scaffold_3352_c1,SM1050_MG_virome_scaffold_965_c7	MG_virome	yes	124207	No	128	12	5	Low-quality	Genome-fragment	28.89	AAI-based (high-confidence)	1		11	0.9489	8	67.952	Viruses;Duplodnaviria;Heunggongvirae;Uroviricota;Caudoviricetes	dsDNA	Prokaryote	Duplodnaviria	Heunggongvirae	Uroviricota	Caudoviricetes
SM1000_MG_virome_scaffold_10_c5	SM1000_MG_virome_scaffold_10_c5	MG_virome	yes	24471	No	38	9	5	Low-quality	Genome-fragment	5.63	AAI-based (high-confidence)	1		11	0.977	1	17.4959	Viruses;Duplodnaviria;Heunggongvirae;Uroviricota;Caudoviricetes	dsDNA	Prokaryote	Duplodnaviria	Heunggongvirae	Uroviricota	Caudoviricetes
SM1000_MG_virome_scaffold_10_c6	SM1000_MG_virome_scaffold_10_c6	MG_virome	yes	10316	No	20	1	1	Low-quality	Genome-fragment	2.31	AAI-based (high-confidence)	1		11	0.9503	0	4.4505	Viruses;Duplodnaviria;Heunggongvirae;Uroviricota;Caudoviricetes	dsDNA	Prokaryote	Duplodnaviria	Heunggongvirae	Uroviricota	Caudoviricetes
SM1000_MG_virome_scaffold_1000_c1	SM1000_MG_virome_scaffold_1000_c1	MG_virome	yes	40656	No	48	15	0	Complete	High-quality	100	DTR (high-confidence)	1		11	0.9798	6	27.3808	Viruses;Duplodnaviria;Heunggongvirae;Uroviricota;Caudoviricetes;Autographiviridae	dsDNA	Prokaryote	Duplodnaviria	Heunggongvirae	Uroviricota	Caudoviricetes		Autographiviridae
SM1000_MG_virome_scaffold_1001_c3	SM1000_MG_virome_scaffold_1001_c3	MG_virome	yes	29192	No	48	9	0	Low-quality	Genome-fragment	37.53	HMM-based (lower-bound)	1		11	0.8697	5	20.8955	Viruses;Duplodnaviria;Heunggongvirae;Uroviricota;Caudoviricetes	dsDNA	Prokaryote	Duplodnaviria	Heunggongvirae	Uroviricota	Caudoviricetes
SM1000_MG_virome_scaffold_1002_c1	SM1000_MG_virome_scaffold_1002_c1	MG_virome	yes	40653	No	55	3	0	Complete	High-quality	100	DTR (high-confidence)	1		11	0.9454	1	15.96	Viruses;Duplodnaviria;Heunggongvirae;Uroviricota;Caudoviricetes	dsDNA	Prokaryote	Duplodnaviria	Heunggongvirae	Uroviricota	Caudoviricetes
SM1000_MG_virome_scaffold_1004_c1	SM1000_MG_virome_scaffold_1004_c1	MG_virome	yes	40642	No	63	17	1	High-quality	High-quality	100	AAI-based (medium-confidence)	1		11	0.9777	9	42.2216	Viruses;Duplodnaviria;Heunggongvirae;Uroviricota;Caudoviricetes	dsDNA	Prokaryote	Duplodnaviria	Heunggongvirae	Uroviricota	Caudoviricetes
SM1000_MG_virome_scaffold_1005_c1	SM1000_MG_virome_scaffold_1005_c1	MG_virome	yes	40632	No	61	21	0	Complete	High-quality	100	DTR (high-confidence)	1		11	0.9768	10	35.4119	Viruses;Duplodnaviria;Heunggongvirae;Uroviricota;Caudoviricetes	dsDNA	Prokaryote	Duplodnaviria	Heunggongvirae	Uroviricota	Caudoviricetes
SM1000_MG_virome_scaffold_1006_c1	SM1000_MG_virome_scaffold_1006_c1	MG_virome	yes	32053	No	53	5	1	Low-quality	Genome-fragment	35.94	HMM-based (lower-bound)	1		11	0.9795	3	26.9614	Viruses;Duplodnaviria;Heunggongvirae;Uroviricota;Caudoviricetes	dsDNA	Prokaryote	Duplodnaviria	Heunggongvirae	Uroviricota	Caudoviricetes
SM1000_MG_virome_scaffold_1007_c1	SM1000_MG_virome_scaffold_1007_c1	MG_virome	yes	40606	No	76	15	3	Medium-quality	Genome-fragment	51.92	HMM-based (lower-bound)	1		11	0.9744	5	48.343	Viruses;Duplodnaviria;Heunggongvirae;Uroviricota;Caudoviricetes	dsDNA	Prokaryote	Duplodnaviria	Heunggongvirae	Uroviricota	Caudoviricetes
SM1000_MG_virome_scaffold_1008_c1	SM1000_MG_virome_scaffold_1008_c1	MG_virome	yes	40604	No	70	16	0	Complete	High-quality	100	DTR (high-confidence)	1.01		11	0.9772	6	40.554	Viruses;Duplodnaviria;Heunggongvirae;Uroviricota;Caudoviricetes	dsDNA	Prokaryote	Duplodnaviria	Heunggongvirae	Uroviricota	Caudoviricetes
SM1000_MG_virome_scaffold_1009_c1	SM1000_MG_virome_scaffold_1009_c1	MG_virome	yes	40581	No	73	13	1	Medium-quality	Genome-fragment	57.53	HMM-based (lower-bound)	1.01		11	0.9715	6	46.6386	Viruses;Duplodnaviria;Heunggongvirae;Uroviricota;Caudoviricetes	dsDNA	Prokaryote	Duplodnaviria	Heunggongvirae	Uroviricota	Caudoviricetes
SM1000_MG_virome_scaffold_101_c1	SM1000_MG_virome_scaffold_101_c1	MG_virome	yes	102020	No	138	24	3	High-quality	High-quality	100	AAI-based (medium-confidence)	1		11	0.9775	9	63.0749	Viruses;Duplodnaviria;Heunggongvirae;Uroviricota;Caudoviricetes	dsDNA	Prokaryote	Duplodnaviria	Heunggongvirae	Uroviricota	Caudoviricetes
SM1000_MG_virome_scaffold_1010_c1	SM1000_MG_virome_scaffold_1010_c1	MG_virome	yes	40532	No	63	9	1	Complete	High-quality	100	DTR (high-confidence)	1		11	0.9753	5	47.6635	Viruses;Duplodnaviria;Heunggongvirae;Uroviricota;Caudoviricetes	dsDNA	Prokaryote	Duplodnaviria	Heunggongvirae	Uroviricota	Caudoviricetes
SM1000_MG_virome_scaffold_1011_c1	SM1000_MG_virome_scaffold_1011_c1	MG_virome	yes	40527	No	76	5	2	Low-quality	Genome-fragment	25.5	AAI-based (medium-confidence)	1		11	0.9676	0	22.7597	Viruses;Duplodnaviria;Heunggongvirae;Uroviricota;Caudoviricetes	dsDNA	Prokaryote	Duplodnaviria	Heunggongvirae	Uroviricota	Caudoviricetes
SM1000_MG_virome_scaffold_1012_c1	SM1000_MG_virome_scaffold_1012_c1	MG_virome	yes	40517	No	61	8	1	High-quality	High-quality	100	AAI-based (medium-confidence)	1		11	0.9563	4	28.6452	Viruses;Duplodnaviria;Heunggongvirae;Uroviricota;Caudoviricetes	dsDNA	Prokaryote	Duplodnaviria	Heunggongvirae	Uroviricota	Caudoviricetes
SM1000_MG_virome_scaffold_1013_c1	SM1000_MG_virome_scaffold_1013_c1	MG_virome	yes	36154	No	55	17	0	Low-quality	Genome-fragment	49.65	HMM-based (lower-bound)	1		11	0.9772	9	35.5418	Viruses;Duplodnaviria;Heunggongvirae;Uroviricota;Caudoviricetes	dsDNA	Prokaryote	Duplodnaviria	Heunggongvirae	Uroviricota	Caudoviricetes
SM1000_MG_virome_scaffold_1014_c1	SM1000_MG_virome_scaffold_1014_c1	MG_virome	yes	10955	No	10	1	0	Low-quality	Genome-fragment	4.94	HMM-based (lower-bound)	1		11	0.9771	0	5.1367	Viruses;Duplodnaviria;Heunggongvirae;Uroviricota;Caudoviricetes	dsDNA	Prokaryote	Duplodnaviria	Heunggongvirae	Uroviricota	Caudoviricetes
SM1000_MG_virome_scaffold_1014_c2	SM1000_MG_virome_scaffold_1014_c2	MG_virome	yes	10912	No	13	3	0	Low-quality	Genome-fragment	22.64	AAI-based (medium-confidence)	1		11	0.98	3	4.9971	Viruses;Duplodnaviria;Heunggongvirae;Uroviricota;Caudoviricetes	dsDNA	Prokaryote	Duplodnaviria	Heunggongvirae	Uroviricota	Caudoviricetes
SM1000_MG_virome_scaffold_1014_c3	SM1000_MG_virome_scaffold_1014_c3	MG_virome	yes	18603	No	30	6	0	Low-quality	Genome-fragment	43.24	AAI-based (medium-confidence)	1		11	0.9778	2	12.8343	Viruses;Duplodnaviria;Heunggongvirae;Uroviricota;Caudoviricetes	dsDNA	Prokaryote	Duplodnaviria	Heunggongvirae	Uroviricota	Caudoviricetes
SM1000_MG_virome_scaffold_1015_c1	SM1000_MG_virome_scaffold_1015_c1	MG_virome	yes	22643	No	40	8	0	Medium-quality	Genome-fragment	53.15	AAI-based (medium-confidence)	1		11	0.9646	7	25.2873	Viruses;Duplodnaviria;Heunggongvirae;Uroviricota;Caudoviricetes	dsDNA	Prokaryote	Duplodnaviria	Heunggongvirae	Uroviricota	Caudoviricetes
SM1000_MG_virome_scaffold_1015_c2	SM1000_MG_virome_scaffold_1015_c2	MG_virome	yes	17828	No	17	2	0	Low-quality	Genome-fragment	47.35	AAI-based (medium-confidence)	1		11	0.9718	3	15.7835	Viruses;Duplodnaviria;Heunggongvirae;Uroviricota;Caudoviricetes	dsDNA	Prokaryote	Duplodnaviria	Heunggongvirae	Uroviricota	Caudoviricetes
SM1000_MG_virome_scaffold_1016_c2	SM1000_MG_virome_scaffold_1016_c2	MG_virome	yes	31133	No	43	4	2	Low-quality	Genome-fragment	46.85	HMM-based (lower-bound)	1.01		11	0.9283	1	15.0729	Viruses;Duplodnaviria;Heunggongvirae;Uroviricota;Caudoviricetes	dsDNA	Prokaryote	Duplodnaviria	Heunggongvirae	Uroviricota	Caudoviricetes
SM1000_MG_virome_scaffold_1017_c1	SM1000_MG_virome_scaffold_1017_c1	MG_virome	yes	40460	No	70	5	0	Complete	High-quality	100	DTR (high-confidence)	1		11	0.9765	4	26.9563	Viruses;Duplodnaviria;Heunggongvirae;Uroviricota;Caudoviricetes	dsDNA	Prokaryote	Duplodnaviria	Heunggongvirae	Uroviricota	Caudoviricetes
SM1000_MG_virome_scaffold_1018_c1	SM1000_MG_virome_scaffold_1018_c1	MG_virome	yes	40456	No	74	14	1	High-quality	High-quality	100	AAI-based (medium-confidence)	1.01		11	0.9766	6	57.4383	Viruses;Duplodnaviria;Heunggongvirae;Uroviricota;Caudoviricetes	dsDNA	Prokaryote	Duplodnaviria	Heunggongvirae	Uroviricota	Caudoviricetes
SM1000_MG_virome_scaffold_1019_c1	SM1000_MG_virome_scaffold_1019_c1	MG_virome	yes	40446	No	49	12	0	Complete	High-quality	100	DTR (high-confidence)	1.01		11	0.9678	3	33.468	Viruses;Duplodnaviria;Heunggongvirae;Uroviricota;Caudoviricetes	dsDNA	Prokaryote	Duplodnaviria	Heunggongvirae	Uroviricota	Caudoviricetes
SM1000_MG_virome_scaffold_102_c2	SM1000_MG_virome_scaffold_102_c2	MG_virome	yes	48497	No	64	5	1	Low-quality	Genome-fragment	29.47	AAI-based (medium-confidence)	1		11	0.8038	2	25.1011	Viruses;Duplodnaviria;Heunggongvirae;Uroviricota;Caudoviricetes	dsDNA	Prokaryote	Duplodnaviria	Heunggongvirae	Uroviricota	Caudoviricetes
SM1000_MG_virome_scaffold_102_c3	SM1000_MG_virome_scaffold_102_c3	MG_virome	yes	23157	No	24	2	0	Low-quality	Genome-fragment	14.21	AAI-based (medium-confidence)	1		11	0.8766	1	10.1981	Viruses;Duplodnaviria;Heunggongvirae;Uroviricota;Caudoviricetes	dsDNA	Prokaryote	Duplodnaviria	Heunggongvirae	Uroviricota	Caudoviricetes
SM1000_MG_virome_scaffold_102_c4	SM1000_MG_virome_scaffold_102_c4	MG_virome	yes	22862	No	28	4	0	Low-quality	Genome-fragment	13.85	AAI-based (medium-confidence)	1		11	0.8591	2	11.7077	Viruses;Duplodnaviria;Heunggongvirae;Uroviricota;Caudoviricetes	dsDNA	Prokaryote	Duplodnaviria	Heunggongvirae	Uroviricota	Caudoviricetes
SM1000_MG_virome_scaffold_1020_c4	SM1000_MG_virome_scaffold_1020_c4	MG_virome	yes	17938	No	30	6	0	Low-quality	Genome-fragment	29.75	HMM-based (lower-bound)	1		11	0.9696	4	24.712	Viruses;Duplodnaviria;Heunggongvirae;Uroviricota;Caudoviricetes	dsDNA	Prokaryote	Duplodnaviria	Heunggongvirae	Uroviricota	Caudoviricetes
SM1000_MG_virome_scaffold_1021_c1	SM1000_MG_virome_scaffold_1021_c1	MG_virome	yes	40430	No	67	8	0	Complete	High-quality	100	DTR (high-confidence)	1		11	0.9774	6	30.2612	Viruses;Duplodnaviria;Heunggongvirae;Uroviricota;Caudoviricetes	dsDNA	Prokaryote	Duplodnaviria	Heunggongvirae	Uroviricota	Caudoviricetes
SM1000_MG_virome_scaffold_1022_c1	SM1000_MG_virome_scaffold_1022_c1	MG_virome	yes	40416	No	55	4	1	Low-quality	Genome-fragment	49.34	HMM-based (lower-bound)	1		11	0.9634	4	29.9392	Viruses;Duplodnaviria;Heunggongvirae;Uroviricota;Caudoviricetes	dsDNA	Prokaryote	Duplodnaviria	Heunggongvirae	Uroviricota	Caudoviricetes
SM1000_MG_virome_scaffold_1023_c1	SM1000_MG_virome_scaffold_1023_c1	MG_virome	yes	40410	No	52	10	0	Medium-quality	Genome-fragment	87.56	AAI-based (medium-confidence)	1.01		11	0.9759	2	51.3849	Viruses;Duplodnaviria;Heunggongvirae;Uroviricota;Caudoviricetes	dsDNA	Prokaryote	Duplodnaviria	Heunggongvirae	Uroviricota	Caudoviricetes
SM1000_MG_virome_scaffold_1025_c1	SM1000_MG_virome_scaffold_1025_c1	MG_virome	yes	40396	No	70	18	1	High-quality	High-quality	100	AAI-based (medium-confidence)	1.01		11	0.9737	5	49.6417	Viruses;Duplodnaviria;Heunggongvirae;Uroviricota;Caudoviricetes	dsDNA	Prokaryote	Duplodnaviria	Heunggongvirae	Uroviricota	Caudoviricetes
SM1000_MG_virome_scaffold_1026_c1	SM1000_MG_virome_scaffold_1026_c1	MG_virome	yes	40346	No	72	6	0	High-quality	High-quality	94.07	AAI-based (medium-confidence)	1		11	0.9602	4	30.0276	Viruses;Duplodnaviria;Heunggongvirae;Uroviricota;Caudoviricetes	dsDNA	Prokaryote	Duplodnaviria	Heunggongvirae	Uroviricota	Caudoviricetes
SM1000_MG_virome_scaffold_1027_c1	SM1000_MG_virome_scaffold_1027_c1	MG_virome	yes	40340	No	61	6	2	Low-quality	Genome-fragment	45.16	HMM-based (lower-bound)	1.01		11	0.9786	5	34.9371	Viruses;Duplodnaviria;Heunggongvirae;Uroviricota;Caudoviricetes	dsDNA	Prokaryote	Duplodnaviria	Heunggongvirae	Uroviricota	Caudoviricetes
SM1000_MG_virome_scaffold_1028_c1	SM1000_MG_virome_scaffold_1028_c1	MG_virome	yes	40326	No	48	3	0	Medium-quality	Genome-fragment	73.16	AAI-based (medium-confidence)	1		11	0.8931	5	14.6105	Viruses;Duplodnaviria;Heunggongvirae;Uroviricota;Caudoviricetes	dsDNA	Prokaryote	Duplodnaviria	Heunggongvirae	Uroviricota	Caudoviricetes
SM1000_MG_virome_scaffold_1029_c1	SM1000_MG_virome_scaffold_1029_c1	MG_virome	yes	40325	No	69	10	0	Complete	High-quality	100	DTR (high-confidence)	1		11	0.9687	4	51.8279	Viruses;Duplodnaviria;Heunggongvirae;Uroviricota;Caudoviricetes	dsDNA	Prokaryote	Duplodnaviria	Heunggongvirae	Uroviricota	Caudoviricetes
SM1000_MG_virome_scaffold_1030_c1	SM1000_MG_virome_scaffold_1030_c1,SM1050_MG_virome_scaffold_2366_c1	MG_virome	yes	40313	No	67	20	0	Complete	High-quality	100	DTR (high-confidence)	1		11	0.9768	7	47.9554	Viruses;Duplodnaviria;Heunggongvirae;Uroviricota;Caudoviricetes	dsDNA	Prokaryote	Duplodnaviria	Heunggongvirae	Uroviricota	Caudoviricetes
SM1000_MG_virome_scaffold_1031_c1	SM1000_MG_virome_scaffold_1031_c1	MG_virome	yes	40311	No	69	9	2	Complete	High-quality	100	DTR (high-confidence)	1		11	0.9755	4	31.8006	Viruses;Duplodnaviria;Heunggongvirae;Uroviricota;Caudoviricetes	dsDNA	Prokaryote	Duplodnaviria	Heunggongvirae	Uroviricota	Caudoviricetes
SM1000_MG_virome_scaffold_1032_c1	SM1000_MG_virome_scaffold_1032_c1	MG_virome	yes	40274	No	74	16	0	High-quality	High-quality	100	AAI-based (medium-confidence)	1		11	0.9704	10	40.259	Viruses;Duplodnaviria;Heunggongvirae;Uroviricota;Caudoviricetes	dsDNA	Prokaryote	Duplodnaviria	Heunggongvirae	Uroviricota	Caudoviricetes
SM1000_MG_virome_scaffold_1033_c1	SM1000_MG_virome_scaffold_1033_c1	MG_virome	yes	40254	No	72	8	2	Complete	High-quality	100	DTR (high-confidence)	1		11	0.9595	9	34.2834	Viruses;Duplodnaviria;Heunggongvirae;Uroviricota;Caudoviricetes	dsDNA	Prokaryote	Duplodnaviria	Heunggongvirae	Uroviricota	Caudoviricetes
SM1000_MG_virome_scaffold_1034_c1	SM1000_MG_virome_scaffold_1034_c1	MG_virome	yes	40240	No	65	25	0	High-quality	High-quality	100	AAI-based (high-confidence)	1		11	0.9822	8	62.7867	Viruses;Duplodnaviria;Heunggongvirae;Uroviricota;Caudoviricetes	dsDNA	Prokaryote	Duplodnaviria	Heunggongvirae	Uroviricota	Caudoviricetes
SM1000_MG_virome_scaffold_1035_c1	SM1000_MG_virome_scaffold_1035_c1	MG_virome	yes	40213	No	68	18	1	Medium-quality	Genome-fragment	67.63	AAI-based (high-confidence)	1		11	0.9699	13	46.887	Viruses;Duplodnaviria;Heunggongvirae;Uroviricota;Caudoviricetes	dsDNA	Prokaryote	Duplodnaviria	Heunggongvirae	Uroviricota	Caudoviricetes
SM1000_MG_virome_scaffold_1036_c1	SM1000_MG_virome_scaffold_1036_c1	MG_virome	yes	40178	No	62	15	0	High-quality	High-quality	100	AAI-based (high-confidence)	1		11	0.9789	7	42.386	Viruses;Duplodnaviria;Heunggongvirae;Uroviricota;Caudoviricetes	dsDNA	Prokaryote	Duplodnaviria	Heunggongvirae	Uroviricota	Caudoviricetes
SM1000_MG_virome_scaffold_1037_c1	SM1000_MG_virome_scaffold_1037_c1	MG_virome	yes	40175	No	59	5	0	Medium-quality	Genome-fragment	51.03	HMM-based (lower-bound)	1		11	0.9507	2	16.0353	Viruses;Duplodnaviria;Heunggongvirae;Uroviricota;Caudoviricetes	dsDNA	Prokaryote	Duplodnaviria	Heunggongvirae	Uroviricota	Caudoviricetes
SM1000_MG_virome_scaffold_1038_c1	SM1000_MG_virome_scaffold_1038_c1	MG_virome	yes	40161	No	68	18	0	Medium-quality	Genome-fragment	65.11	HMM-based (lower-bound)	1		11	0.9777	7	52.0667	Viruses;Duplodnaviria;Heunggongvirae;Uroviricota;Caudoviricetes	dsDNA	Prokaryote	Duplodnaviria	Heunggongvirae	Uroviricota	Caudoviricetes
SM1000_MG_virome_scaffold_1039_c4	SM1000_MG_virome_scaffold_1039_c4	MG_virome	yes	17966	No	16	2	0	Low-quality	Genome-fragment	5.87	AAI-based (medium-confidence)	1		11	0.9687	5	14.9841	Viruses;Duplodnaviria;Heunggongvirae;Uroviricota;Caudoviricetes	dsDNA	Prokaryote	Duplodnaviria	Heunggongvirae	Uroviricota	Caudoviricetes
SM1000_MG_virome_scaffold_104_c1	SM1000_MG_virome_scaffold_104_c1,SM1030_MG_virome_scaffold_91_c5_1|2618-29033/29033,SM1030_MG_virome_scaffold_91_c4,SM1030_MG_virome_scaffold_924_c1	MG_virome	yes	99791	No	119	18	2	High-quality	High-quality	98.95	AAI-based (medium-confidence)	1		11	0.9807	5	82.4483	Viruses;Duplodnaviria;Heunggongvirae;Uroviricota;Caudoviricetes;Crassvirales	dsDNA	Prokaryote	Duplodnaviria	Heunggongvirae	Uroviricota	Caudoviricetes	Crassvirales
SM1000_MG_virome_scaffold_1041_c2	SM1000_MG_virome_scaffold_1041_c2	MG_virome	yes	33725	No	37	7	0	Low-quality	Genome-fragment	40.32	HMM-based (lower-bound)	1		11	0.977	1	10.3997	Viruses;Duplodnaviria;Heunggongvirae;Uroviricota;Caudoviricetes	dsDNA	Prokaryote	Duplodnaviria	Heunggongvirae	Uroviricota	Caudoviricetes
SM1000_MG_virome_scaffold_1042_c1	SM1000_MG_virome_scaffold_1042_c1	MG_virome	yes	40102	No	66	4	0	Medium-quality	Genome-fragment	69.9	AAI-based (medium-confidence)	1		11	0.891	2	19.8647	Viruses;Duplodnaviria;Heunggongvirae;Uroviricota;Caudoviricetes	dsDNA	Prokaryote	Duplodnaviria	Heunggongvirae	Uroviricota	Caudoviricetes
SM1000_MG_virome_scaffold_1043_c1	SM1000_MG_virome_scaffold_1043_c1	MG_virome	yes	36856	No	69	17	0	Medium-quality	Genome-fragment	51.77	HMM-based (lower-bound)	1		11	0.9699	12	38.3209	Viruses;Duplodnaviria;Heunggongvirae;Uroviricota;Caudoviricetes	dsDNA	Prokaryote	Duplodnaviria	Heunggongvirae	Uroviricota	Caudoviricetes
SM1000_MG_virome_scaffold_1044_c1	SM1000_MG_virome_scaffold_1044_c1	MG_virome	yes	40070	No	55	6	1	High-quality	High-quality	100	AAI-based (medium-confidence)	1		11	0.955	2	21.6577	Viruses;Duplodnaviria;Heunggongvirae;Uroviricota;Caudoviricetes	dsDNA	Prokaryote	Duplodnaviria	Heunggongvirae	Uroviricota	Caudoviricetes
SM1000_MG_virome_scaffold_1045_c2	SM1000_MG_virome_scaffold_1045_c2	MG_virome	yes	15692	No	16	5	0	Low-quality	Genome-fragment	43.28	AAI-based (high-confidence)	1		11	0.9706	5	13.1033	Viruses;Duplodnaviria;Heunggongvirae;Uroviricota;Caudoviricetes	dsDNA	Prokaryote	Duplodnaviria	Heunggongvirae	Uroviricota	Caudoviricetes
SM1000_MG_virome_scaffold_1045_c3	SM1000_MG_virome_scaffold_1045_c3	MG_virome	yes	16405	No	36	5	0	Low-quality	Genome-fragment	45.24	AAI-based (medium-confidence)	1		11	0.9573	1	10.9041	Viruses;Duplodnaviria;Heunggongvirae;Uroviricota;Caudoviricetes	dsDNA	Prokaryote	Duplodnaviria	Heunggongvirae	Uroviricota	Caudoviricetes
SM1000_MG_virome_scaffold_1046_c1	SM1000_MG_virome_scaffold_1046_c1	MG_virome	yes	40031	No	59	14	0	High-quality	High-quality	99.01	AAI-based (medium-confidence)	1.01		11	0.9784	6	39.9193	Viruses;Duplodnaviria;Heunggongvirae;Uroviricota;Caudoviricetes	dsDNA	Prokaryote	Duplodnaviria	Heunggongvirae	Uroviricota	Caudoviricetes
SM1000_MG_virome_scaffold_1048_c1	SM1000_MG_virome_scaffold_1048_c1	MG_virome	yes	40028	No	61	9	2	High-quality	High-quality	100	AAI-based (high-confidence)	1		11	0.9556	4	38.1739	Viruses;Duplodnaviria;Heunggongvirae;Uroviricota;Caudoviricetes	dsDNA	Prokaryote	Duplodnaviria	Heunggongvirae	Uroviricota	Caudoviricetes
SM1000_MG_virome_scaffold_1049_c1	SM1000_MG_virome_scaffold_1049_c1	MG_virome	yes	40008	No	59	10	0	High-quality	High-quality	100	AAI-based (medium-confidence)	1		11	0.9773	6	39.203	Viruses;Duplodnaviria;Heunggongvirae;Uroviricota;Caudoviricetes	dsDNA	Prokaryote	Duplodnaviria	Heunggongvirae	Uroviricota	Caudoviricetes
SM1000_MG_virome_scaffold_105_c1	SM1000_MG_virome_scaffold_105_c1	MG_virome	yes	99674	No	148	21	2	High-quality	High-quality	93.4	AAI-based (medium-confidence)	1		11	0.8506	14	66.6941	Viruses;Duplodnaviria;Heunggongvirae;Uroviricota;Caudoviricetes	dsDNA	Prokaryote	Duplodnaviria	Heunggongvirae	Uroviricota	Caudoviricetes
SM1000_MG_virome_scaffold_1050_c5	SM1000_MG_virome_scaffold_1050_c5	MG_virome	yes	26765	No	53	9	0	Low-quality	Genome-fragment	16.76	AAI-based (medium-confidence)	1		11	0.9761	3	33.3446	Viruses;Duplodnaviria;Heunggongvirae;Uroviricota;Caudoviricetes	dsDNA	Prokaryote	Duplodnaviria	Heunggongvirae	Uroviricota	Caudoviricetes
SM1000_MG_virome_scaffold_1052_c1	SM1000_MG_virome_scaffold_1052_c1	MG_virome	yes	13802	No	33	7	0	Low-quality	Genome-fragment	34.92	AAI-based (high-confidence)	1		11	0.9006	0	14.257	Viruses;Duplodnaviria;Heunggongvirae;Uroviricota;Caudoviricetes	dsDNA	Prokaryote	Duplodnaviria	Heunggongvirae	Uroviricota	Caudoviricetes
SM1000_MG_virome_scaffold_1052_c2	SM1000_MG_virome_scaffold_1052_c2	MG_virome	yes	24744	No	38	3	0	Medium-quality	Genome-fragment	63.31	AAI-based (high-confidence)	1		11	0.9225	2	27.0268	Viruses;Duplodnaviria;Heunggongvirae;Uroviricota;Caudoviricetes	dsDNA	Prokaryote	Duplodnaviria	Heunggongvirae	Uroviricota	Caudoviricetes
SM1000_MG_virome_scaffold_1053_c1	SM1000_MG_virome_scaffold_1053_c1	MG_virome	yes	39967	No	59	7	0	Medium-quality	Genome-fragment	52.12	HMM-based (lower-bound)	1		11	0.9647	5	19.2665	Viruses;Duplodnaviria;Heunggongvirae;Uroviricota;Caudoviricetes	dsDNA	Prokaryote	Duplodnaviria	Heunggongvirae	Uroviricota	Caudoviricetes
SM1000_MG_virome_scaffold_1054_c1	SM1000_MG_virome_scaffold_1054_c1	MG_virome	yes	39951	No	59	10	2	High-quality	High-quality	97.9	AAI-based (high-confidence)	1		11	0.9662	9	26.8651	Viruses;Duplodnaviria;Heunggongvirae;Uroviricota;Caudoviricetes	dsDNA	Prokaryote	Duplodnaviria	Heunggongvirae	Uroviricota	Caudoviricetes
SM1000_MG_virome_scaffold_1055_c1	SM1000_MG_virome_scaffold_1055_c1	MG_virome	yes	39925	No	51	7	4	Complete	High-quality	100	DTR (high-confidence)	1		11	0.958	4	23.823	Viruses;Duplodnaviria;Heunggongvirae;Uroviricota;Caudoviricetes	dsDNA	Prokaryote	Duplodnaviria	Heunggongvirae	Uroviricota	Caudoviricetes
SM1000_MG_virome_scaffold_1056_c1	SM1000_MG_virome_scaffold_1056_c1	MG_virome	yes	39921	No	48	9	0	Medium-quality	Genome-fragment	53.06	HMM-based (lower-bound)	1		11	0.9694	2	24.1089	Viruses;Duplodnaviria;Heunggongvirae;Uroviricota;Caudoviricetes	dsDNA	Prokaryote	Duplodnaviria	Heunggongvirae	Uroviricota	Caudoviricetes
SM1000_MG_virome_scaffold_1057_c7	SM1000_MG_virome_scaffold_1057_c7	MG_virome	yes	22731	No	27	4	0	Low-quality	Genome-fragment	42.78	AAI-based (high-confidence)	1		11	0.972	2	15.5296	Viruses;Duplodnaviria;Heunggongvirae;Uroviricota;Caudoviricetes	dsDNA	Prokaryote	Duplodnaviria	Heunggongvirae	Uroviricota	Caudoviricetes
SM1000_MG_virome_scaffold_1058_c1	SM1000_MG_virome_scaffold_1058_c1	MG_virome	yes	39874	No	67	10	0	Medium-quality	Genome-fragment	60.96	AAI-based (medium-confidence)	1		11	0.977	3	22.2865	Viruses;Duplodnaviria;Heunggongvirae;Uroviricota;Caudoviricetes	dsDNA	Prokaryote	Duplodnaviria	Heunggongvirae	Uroviricota	Caudoviricetes
SM1000_MG_virome_scaffold_1059_c1	SM1000_MG_virome_scaffold_1059_c1,SM1050_MG_virome_scaffold_792_c1,SM1005_MG_virome_scaffold_944_c1	MG_virome	yes	39850	No	70	20	0	Low-quality	Genome-fragment	48.83	HMM-based (lower-bound)	1		11	0.9379	7	34.009	Viruses;Duplodnaviria;Heunggongvirae;Uroviricota;Caudoviricetes	dsDNA	Prokaryote	Duplodnaviria	Heunggongvirae	Uroviricota	Caudoviricetes
SM1000_MG_virome_scaffold_106_c1	SM1000_MG_virome_scaffold_106_c1	MG_virome	yes	42251	No	59	30	0	Medium-quality	Genome-fragment	86.26	AAI-based (medium-confidence)	1		11	0.9757	12	48.0692	Viruses;Duplodnaviria;Heunggongvirae;Uroviricota;Caudoviricetes	dsDNA	Prokaryote	Duplodnaviria	Heunggongvirae	Uroviricota	Caudoviricetes
SM1000_MG_virome_scaffold_106_c2	SM1000_MG_virome_scaffold_106_c2	MG_virome	yes	57107	No	81	35	1	High-quality	High-quality	100	AAI-based (medium-confidence)	1.01		11	0.971	13	53.8998	Viruses;Duplodnaviria;Heunggongvirae;Uroviricota;Caudoviricetes	dsDNA	Prokaryote	Duplodnaviria	Heunggongvirae	Uroviricota	Caudoviricetes
SM1000_MG_virome_scaffold_1060_c1	SM1000_MG_virome_scaffold_1060_c1	MG_virome	yes	39823	No	50	9	0	Complete	High-quality	100	DTR (high-confidence)	1		11	0.9489	3	24.4332	Viruses;Duplodnaviria;Heunggongvirae;Uroviricota;Caudoviricetes	dsDNA	Prokaryote	Duplodnaviria	Heunggongvirae	Uroviricota	Caudoviricetes
SM1000_MG_virome_scaffold_1061_c1	SM1000_MG_virome_scaffold_1061_c1	MG_virome	yes	39815	No	53	21	0	Medium-quality	Genome-fragment	52.27	HMM-based (lower-bound)	1		11	0.9813	12	39.4634	Viruses;Duplodnaviria;Heunggongvirae;Uroviricota;Caudoviricetes	dsDNA	Prokaryote	Duplodnaviria	Heunggongvirae	Uroviricota	Caudoviricetes
SM1000_MG_virome_scaffold_1062_c2	SM1000_MG_virome_scaffold_1062_c2	MG_virome	yes	21249	No	39	4	1	Low-quality	Genome-fragment	18.23	HMM-based (lower-bound)	1		11	0.9721	3	16.6572	Viruses;Duplodnaviria;Heunggongvirae;Uroviricota;Caudoviricetes	dsDNA	Prokaryote	Duplodnaviria	Heunggongvirae	Uroviricota	Caudoviricetes
SM1000_MG_virome_scaffold_1062_c4	SM1000_MG_virome_scaffold_1062_c4	MG_virome	yes	12158	No	15	2	1	Low-quality	Genome-fragment	18.79	AAI-based (medium-confidence)	1		11	0.9655	2	4.3456	Viruses;Duplodnaviria;Heunggongvirae;Uroviricota;Caudoviricetes	dsDNA	Prokaryote	Duplodnaviria	Heunggongvirae	Uroviricota	Caudoviricetes
SM1000_MG_virome_scaffold_1063_c1	SM1000_MG_virome_scaffold_1063_c1	MG_virome	yes	13514	No	12	1	0	Low-quality	Genome-fragment	32.81	AAI-based (medium-confidence)	1		11	0.9558	3	5.1486	Viruses;Duplodnaviria;Heunggongvirae;Uroviricota;Caudoviricetes	dsDNA	Prokaryote	Duplodnaviria	Heunggongvirae	Uroviricota	Caudoviricetes
SM1000_MG_virome_scaffold_1063_c2	SM1000_MG_virome_scaffold_1063_c2	MG_virome	yes	26279	No	40	3	1	Medium-quality	Genome-fragment	52.69	AAI-based (medium-confidence)	1		11	0.8717	0	2.2472	Viruses;Duplodnaviria;Heunggongvirae;Uroviricota;Caudoviricetes	dsDNA	Prokaryote	Duplodnaviria	Heunggongvirae	Uroviricota	Caudoviricetes
SM1000_MG_virome_scaffold_1064_c1	SM1000_MG_virome_scaffold_1064_c1	MG_virome	yes	39803	No	79	10	0	Complete	High-quality	100	DTR (high-confidence)	1		11	0.9794	6	51.3229	Viruses;Duplodnaviria;Heunggongvirae;Uroviricota;Caudoviricetes	dsDNA	Prokaryote	Duplodnaviria	Heunggongvirae	Uroviricota	Caudoviricetes
SM1000_MG_virome_scaffold_1066_c1	SM1000_MG_virome_scaffold_1066_c1	MG_virome	yes	39780	No	71	8	0	Complete	High-quality	100	DTR (high-confidence)	1		11	0.9788	6	45.6442	Viruses;Duplodnaviria;Heunggongvirae;Uroviricota;Caudoviricetes	dsDNA	Prokaryote	Duplodnaviria	Heunggongvirae	Uroviricota	Caudoviricetes
SM1000_MG_virome_scaffold_1067_c6	SM1000_MG_virome_scaffold_1067_c6	MG_virome	yes	13217	No	24	8	0	Low-quality	Genome-fragment	10.11	AAI-based (high-confidence)	1		11	0.9807	1	22.2409	Viruses;Duplodnaviria;Heunggongvirae;Uroviricota;Caudoviricetes	dsDNA	Prokaryote	Duplodnaviria	Heunggongvirae	Uroviricota	Caudoviricetes
SM1000_MG_virome_scaffold_1067_c7	SM1000_MG_virome_scaffold_1067_c7	MG_virome	yes	14391	No	31	9	0	Low-quality	Genome-fragment	11.17	AAI-based (high-confidence)	1		11	0.9825	0	32.8261	Viruses;Duplodnaviria;Heunggongvirae;Uroviricota;Caudoviricetes	dsDNA	Prokaryote	Duplodnaviria	Heunggongvirae	Uroviricota	Caudoviricetes
SM1000_MG_virome_scaffold_1068_c1	SM1000_MG_virome_scaffold_1068_c1	MG_virome	yes	39741	No	56	10	1	High-quality	High-quality	99.13	AAI-based (medium-confidence)	1.01		11	0.9806	4	40.0436	Viruses;Duplodnaviria;Heunggongvirae;Uroviricota;Caudoviricetes	dsDNA	Prokaryote	Duplodnaviria	Heunggongvirae	Uroviricota	Caudoviricetes
SM1000_MG_virome_scaffold_1069_c5	SM1000_MG_virome_scaffold_1069_c5	MG_virome	yes	14051	No	28	3	1	Low-quality	Genome-fragment	13.09	HMM-based (lower-bound)	1		11	0.9051	1	5.1586	Viruses;Duplodnaviria;Heunggongvirae;Uroviricota;Caudoviricetes	dsDNA	Prokaryote	Duplodnaviria	Heunggongvirae	Uroviricota	Caudoviricetes
SM1000_MG_virome_scaffold_107_c1	SM1000_MG_virome_scaffold_107_c1,SM1004_MG_virome_scaffold_582_c4	MG_virome	yes	98218	No	170	100	0	Complete	High-quality	100	DTR (high-confidence)	1		11	0.9827	14	209.839	Viruses;Duplodnaviria;Heunggongvirae;Uroviricota;Caudoviricetes	dsDNA	Prokaryote	Duplodnaviria	Heunggongvirae	Uroviricota	Caudoviricetes
SM1000_MG_virome_scaffold_1070_c1	SM1000_MG_virome_scaffold_1070_c1	MG_virome	yes	39736	No	63	5	0	Low-quality	Genome-fragment	42.52	HMM-based (lower-bound)	1		11	0.9569	4	25.5401	Viruses;Duplodnaviria;Heunggongvirae;Uroviricota;Caudoviricetes	dsDNA	Prokaryote	Duplodnaviria	Heunggongvirae	Uroviricota	Caudoviricetes
SM1000_MG_virome_scaffold_1071_c1_1|1-37095/39702	SM1000_MG_virome_scaffold_1071_c1_1|1-37095/39702	MG_virome	yes	37095	Yes	49	12	1	Low-quality	Genome-fragment	10.79	AAI-based (medium-confidence)	1	1-37095	11	0.9792	4	41.0694	Viruses;Duplodnaviria;Heunggongvirae;Uroviricota;Caudoviricetes	dsDNA	Prokaryote	Duplodnaviria	Heunggongvirae	Uroviricota	Caudoviricetes
SM1000_MG_virome_scaffold_1072_c1	SM1000_MG_virome_scaffold_1072_c1	MG_virome	yes	39675	No	67	15	0	Complete	High-quality	100	DTR (high-confidence)	1.01		11	0.9779	5	42.8068	Viruses;Duplodnaviria;Heunggongvirae;Uroviricota;Caudoviricetes	dsDNA	Prokaryote	Duplodnaviria	Heunggongvirae	Uroviricota	Caudoviricetes
SM1000_MG_virome_scaffold_1073_c4	SM1000_MG_virome_scaffold_1073_c4	MG_virome	yes	13273	No	26	7	0	Low-quality	Genome-fragment	34.41	AAI-based (medium-confidence)	1		11	0.9815	7	16.0308	Viruses;Duplodnaviria;Heunggongvirae;Uroviricota;Caudoviricetes	dsDNA	Prokaryote	Duplodnaviria	Heunggongvirae	Uroviricota	Caudoviricetes
SM1000_MG_virome_scaffold_1074_c1	SM1000_MG_virome_scaffold_1074_c1	MG_virome	yes	13367	No	19	3	0	Low-quality	Genome-fragment	11.64	HMM-based (lower-bound)	1		11	0.9793	0	13.7132	Viruses;Duplodnaviria;Heunggongvirae;Uroviricota;Caudoviricetes	dsDNA	Prokaryote	Duplodnaviria	Heunggongvirae	Uroviricota	Caudoviricetes
SM1000_MG_virome_scaffold_1074_c2	SM1000_MG_virome_scaffold_1074_c2	MG_virome	yes	17595	No	25	5	1	Low-quality	Genome-fragment	42.36	AAI-based (medium-confidence)	1		11	0.9796	5	19.1957	Viruses;Duplodnaviria;Heunggongvirae;Uroviricota;Caudoviricetes	dsDNA	Prokaryote	Duplodnaviria	Heunggongvirae	Uroviricota	Caudoviricetes
SM1000_MG_virome_scaffold_1075_c2	SM1000_MG_virome_scaffold_1075_c2	MG_virome	yes	38128	No	52	8	1	Medium-quality	Genome-fragment	61.12	AAI-based (high-confidence)	1		11	0.9113	7	18.3989	Viruses;Duplodnaviria;Heunggongvirae;Uroviricota;Caudoviricetes	dsDNA	Prokaryote	Duplodnaviria	Heunggongvirae	Uroviricota	Caudoviricetes
SM1000_MG_virome_scaffold_1076_c4	SM1000_MG_virome_scaffold_1076_c4	MG_virome	yes	14316	No	28	2	0	Low-quality	Genome-fragment	19.53	HMM-based (lower-bound)	1		11	0.9551	2	6.224	Viruses;Duplodnaviria;Heunggongvirae;Uroviricota;Caudoviricetes	dsDNA	Prokaryote	Duplodnaviria	Heunggongvirae	Uroviricota	Caudoviricetes
SM1000_MG_virome_scaffold_1077_c1	SM1000_MG_virome_scaffold_1077_c1	MG_virome	yes	39639	No	50	18	0	Complete	High-quality	100	DTR (high-confidence)	1		11	0.9804	10	53.272	Viruses;Duplodnaviria;Heunggongvirae;Uroviricota;Caudoviricetes	dsDNA	Prokaryote	Duplodnaviria	Heunggongvirae	Uroviricota	Caudoviricetes
SM1000_MG_virome_scaffold_1078_c1	SM1000_MG_virome_scaffold_1078_c1	MG_virome	yes	39637	No	68	23	0	Complete	High-quality	100	DTR (high-confidence)	1		11	0.9814	12	63.7786	Viruses;Duplodnaviria;Heunggongvirae;Uroviricota;Caudoviricetes	dsDNA	Prokaryote	Duplodnaviria	Heunggongvirae	Uroviricota	Caudoviricetes
SM1000_MG_virome_scaffold_1079_c1	SM1000_MG_virome_scaffold_1079_c1	MG_virome	yes	39604	No	68	24	0	High-quality	High-quality	100	AAI-based (high-confidence)	1		11	0.9783	8	59.2091	Viruses;Duplodnaviria;Heunggongvirae;Uroviricota;Caudoviricetes	dsDNA	Prokaryote	Duplodnaviria	Heunggongvirae	Uroviricota	Caudoviricetes
SM1000_MG_virome_scaffold_108_c1	SM1000_MG_virome_scaffold_108_c1	MG_virome	yes	23047	No	23	2	0	Low-quality	Genome-fragment	24.33	AAI-based (medium-confidence)	1		11	0.9822	1	22.2915	Viruses;Duplodnaviria;Heunggongvirae;Uroviricota;Caudoviricetes	dsDNA	Prokaryote	Duplodnaviria	Heunggongvirae	Uroviricota	Caudoviricetes
SM1000_MG_virome_scaffold_108_c2	SM1000_MG_virome_scaffold_108_c2	MG_virome	yes	13360	No	19	3	0	Low-quality	Genome-fragment	14.24	AAI-based (medium-confidence)	1		11	0.9821	3	15.0139	Viruses;Duplodnaviria;Heunggongvirae;Uroviricota;Caudoviricetes;Crassvirales	dsDNA	Prokaryote	Duplodnaviria	Heunggongvirae	Uroviricota	Caudoviricetes	Crassvirales
SM1000_MG_virome_scaffold_108_c3	SM1000_MG_virome_scaffold_108_c3	MG_virome	yes	10799	No	20	2	1	Low-quality	Genome-fragment	4.81	HMM-based (lower-bound)	1		11	0.9791	1	7.7435	Viruses;Duplodnaviria;Heunggongvirae;Uroviricota;Caudoviricetes	dsDNA	Prokaryote	Duplodnaviria	Heunggongvirae	Uroviricota	Caudoviricetes
SM1000_MG_virome_scaffold_108_c6	SM1000_MG_virome_scaffold_108_c6	MG_virome	yes	15706	No	27	4	0	Low-quality	Genome-fragment	16.58	AAI-based (medium-confidence)	1		11	0.9815	1	15.5888	Viruses;Duplodnaviria;Heunggongvirae;Uroviricota;Caudoviricetes	dsDNA	Prokaryote	Duplodnaviria	Heunggongvirae	Uroviricota	Caudoviricetes
SM1000_MG_virome_scaffold_1080_c1	SM1000_MG_virome_scaffold_1080_c1	MG_virome	yes	39556	No	63	21	0	Complete	High-quality	100	DTR (high-confidence)	1		11	0.98	11	58.0272	Viruses;Duplodnaviria;Heunggongvirae;Uroviricota;Caudoviricetes	dsDNA	Prokaryote	Duplodnaviria	Heunggongvirae	Uroviricota	Caudoviricetes
SM1000_MG_virome_scaffold_1081_c1	SM1000_MG_virome_scaffold_1081_c1	MG_virome	yes	39540	No	68	8	1	Low-quality	Genome-fragment	41.85	HMM-based (lower-bound)	1		11	0.9658	3	24.5464	Viruses;Duplodnaviria;Heunggongvirae;Uroviricota;Caudoviricetes	dsDNA	Prokaryote	Duplodnaviria	Heunggongvirae	Uroviricota	Caudoviricetes
SM1000_MG_virome_scaffold_1082_c1	SM1000_MG_virome_scaffold_1082_c1	MG_virome	yes	39531	No	66	25	0	Medium-quality	Genome-fragment	55.89	HMM-based (lower-bound)	1		11	0.9648	6	45.3749	Viruses;Duplodnaviria;Heunggongvirae;Uroviricota;Caudoviricetes	dsDNA	Prokaryote	Duplodnaviria	Heunggongvirae	Uroviricota	Caudoviricetes
SM1000_MG_virome_scaffold_1083_c1	SM1000_MG_virome_scaffold_1083_c1	MG_virome	yes	39524	No	62	23	0	Complete	High-quality	100	DTR (high-confidence)	1		11	0.9808	11	59.0488	Viruses;Duplodnaviria;Heunggongvirae;Uroviricota;Caudoviricetes	dsDNA	Prokaryote	Duplodnaviria	Heunggongvirae	Uroviricota	Caudoviricetes
SM1000_MG_virome_scaffold_1085_c1	SM1000_MG_virome_scaffold_1085_c1	MG_virome	yes	39505	No	53	6	1	Complete	High-quality	100	DTR (high-confidence)	1		11	0.9584	6	33.494	Viruses;Duplodnaviria;Heunggongvirae;Uroviricota;Caudoviricetes	dsDNA	Prokaryote	Duplodnaviria	Heunggongvirae	Uroviricota	Caudoviricetes
SM1000_MG_virome_scaffold_1086_c1	SM1000_MG_virome_scaffold_1086_c1,SM1005_MG_virome_scaffold_1930_c1	MG_virome	yes	39480	No	80	12	0	Medium-quality	Genome-fragment	54.69	HMM-based (lower-bound)	1		11	0.9545	7	35.383	Viruses;Duplodnaviria;Heunggongvirae;Uroviricota;Caudoviricetes	dsDNA	Prokaryote	Duplodnaviria	Heunggongvirae	Uroviricota	Caudoviricetes
SM1000_MG_virome_scaffold_1087_c1	SM1000_MG_virome_scaffold_1087_c1	MG_virome	yes	39449	No	59	6	0	Low-quality	Genome-fragment	38.26	HMM-based (lower-bound)	1		11	0.9526	5	18.5862	Viruses;Duplodnaviria;Heunggongvirae;Uroviricota;Caudoviricetes	dsDNA	Prokaryote	Duplodnaviria	Heunggongvirae	Uroviricota	Caudoviricetes
SM1000_MG_virome_scaffold_1089_c2	SM1000_MG_virome_scaffold_1089_c2	MG_virome	yes	21608	No	29	2	0	Low-quality	Genome-fragment	28.61	HMM-based (lower-bound)	1.01		11	0.9723	0	16.5318	Viruses;Duplodnaviria;Heunggongvirae;Uroviricota;Caudoviricetes	dsDNA	Prokaryote	Duplodnaviria	Heunggongvirae	Uroviricota	Caudoviricetes
SM1000_MG_virome_scaffold_1089_c4	SM1000_MG_virome_scaffold_1089_c4	MG_virome	yes	10073	No	18	3	0	Low-quality	Genome-fragment	6.23	HMM-based (lower-bound)	1		11	0.9399	2	6.1446	Viruses;Duplodnaviria;Heunggongvirae;Uroviricota;Caudoviricetes	dsDNA	Prokaryote	Duplodnaviria	Heunggongvirae	Uroviricota	Caudoviricetes
SM1000_MG_virome_scaffold_109_c1	SM1000_MG_virome_scaffold_109_c1	MG_virome	yes	97668	No	157	25	5	Complete	High-quality	100	DTR (high-confidence)	1		11	0.9218	7	53.7119	Viruses;Duplodnaviria;Heunggongvirae;Uroviricota;Caudoviricetes	dsDNA	Prokaryote	Duplodnaviria	Heunggongvirae	Uroviricota	Caudoviricetes
SM1000_MG_virome_scaffold_1090_c1	SM1000_MG_virome_scaffold_1090_c1	MG_virome	yes	39408	No	66	12	0	Medium-quality	Genome-fragment	68.12	HMM-based (lower-bound)	1		11	0.9623	5	45.1796	Viruses;Duplodnaviria;Heunggongvirae;Uroviricota;Caudoviricetes	dsDNA	Prokaryote	Duplodnaviria	Heunggongvirae	Uroviricota	Caudoviricetes
SM1000_MG_virome_scaffold_1091_c2	SM1000_MG_virome_scaffold_1091_c2	MG_virome	yes	10385	No	17	5	0	Low-quality	Genome-fragment	10.3	HMM-based (lower-bound)	1		11	0.9811	1	13.4206	Viruses;Duplodnaviria;Heunggongvirae;Uroviricota;Caudoviricetes	dsDNA	Prokaryote	Duplodnaviria	Heunggongvirae	Uroviricota	Caudoviricetes
SM1000_MG_virome_scaffold_1091_c3	SM1000_MG_virome_scaffold_1091_c3	MG_virome	yes	10708	No	17	11	0	Low-quality	Genome-fragment	26.63	AAI-based (medium-confidence)	1		11	0.9825	6	22.0584	Viruses;Duplodnaviria;Heunggongvirae;Uroviricota;Caudoviricetes	dsDNA	Prokaryote	Duplodnaviria	Heunggongvirae	Uroviricota	Caudoviricetes
SM1000_MG_virome_scaffold_1092_c1	SM1000_MG_virome_scaffold_1092_c1	MG_virome	yes	31357	No	45	5	0	Medium-quality	Genome-fragment	70.06	AAI-based (high-confidence)	1		11	0.9798	4	19.0516	Viruses;Duplodnaviria;Heunggongvirae;Uroviricota;Caudoviricetes	dsDNA	Prokaryote	Duplodnaviria	Heunggongvirae	Uroviricota	Caudoviricetes
SM1000_MG_virome_scaffold_1093_c4	SM1000_MG_virome_scaffold_1093_c4	MG_virome	yes	14233	No	25	1	0	Low-quality	Genome-fragment	32.72	AAI-based (medium-confidence)	1		11	0.9592	2	6.1209	Viruses;Duplodnaviria;Heunggongvirae;Uroviricota;Caudoviricetes	dsDNA	Prokaryote	Duplodnaviria	Heunggongvirae	Uroviricota	Caudoviricetes
SM1000_MG_virome_scaffold_1094_c4	SM1000_MG_virome_scaffold_1094_c4	MG_virome	yes	11498	No	18	4	0	Low-quality	Genome-fragment	23.91	AAI-based (medium-confidence)	1		11	0.9721	0	9.929	Viruses;Duplodnaviria;Heunggongvirae;Uroviricota;Caudoviricetes	dsDNA	Prokaryote	Duplodnaviria	Heunggongvirae	Uroviricota	Caudoviricetes
SM1000_MG_virome_scaffold_1095_c1	SM1000_MG_virome_scaffold_1095_c1	MG_virome	yes	39367	No	69	22	0	High-quality	High-quality	99.84	AAI-based (high-confidence)	1		11	0.9792	12	52.4832	Viruses;Duplodnaviria;Heunggongvirae;Uroviricota;Caudoviricetes	dsDNA	Prokaryote	Duplodnaviria	Heunggongvirae	Uroviricota	Caudoviricetes
SM1000_MG_virome_scaffold_1096_c1	SM1000_MG_virome_scaffold_1096_c1	MG_virome	yes	39357	No	46	3	1	High-quality	High-quality	99.76	AAI-based (high-confidence)	1		11	0.9629	4	19.5099	Viruses;Duplodnaviria;Heunggongvirae;Uroviricota;Caudoviricetes	dsDNA	Prokaryote	Duplodnaviria	Heunggongvirae	Uroviricota	Caudoviricetes
SM1000_MG_virome_scaffold_1097_c1	SM1000_MG_virome_scaffold_1097_c1	MG_virome	yes	12214	No	19	14	0	Low-quality	Genome-fragment	30.44	AAI-based (high-confidence)	1		11	0.9818	6	21.8906	Viruses;Duplodnaviria;Heunggongvirae;Uroviricota;Caudoviricetes	dsDNA	Prokaryote	Duplodnaviria	Heunggongvirae	Uroviricota	Caudoviricetes
SM1000_MG_virome_scaffold_1097_c4	SM1000_MG_virome_scaffold_1097_c4	MG_virome	yes	18245	No	29	12	0	Low-quality	Genome-fragment	46.07	AAI-based (high-confidence)	1		11	0.9821	5	34.2567	Viruses;Duplodnaviria;Heunggongvirae;Uroviricota;Caudoviricetes	dsDNA	Prokaryote	Duplodnaviria	Heunggongvirae	Uroviricota	Caudoviricetes
SM1000_MG_virome_scaffold_1098_c2	SM1000_MG_virome_scaffold_1098_c2	MG_virome	yes	33170	No	50	4	0	Low-quality	Genome-fragment	25.23	HMM-based (lower-bound)	1		11	0.9151	3	19.4836	Viruses;Duplodnaviria;Heunggongvirae;Uroviricota;Caudoviricetes	dsDNA	Prokaryote	Duplodnaviria	Heunggongvirae	Uroviricota	Caudoviricetes
SM1000_MG_virome_scaffold_1099_c2	SM1000_MG_virome_scaffold_1099_c2	MG_virome	yes	11035	No	11	7	0	Low-quality	Genome-fragment	14.65	AAI-based (medium-confidence)	1		11	0.9679	2	11.5794	Viruses;Duplodnaviria;Heunggongvirae;Uroviricota;Caudoviricetes	dsDNA	Prokaryote	Duplodnaviria	Heunggongvirae	Uroviricota	Caudoviricetes
SM1000_MG_virome_scaffold_1099_c3	SM1000_MG_virome_scaffold_1099_c3	MG_virome	yes	21912	No	25	8	0	Low-quality	Genome-fragment	46.17	AAI-based (medium-confidence)	1		11	0.9696	2	18.9551	Viruses;Duplodnaviria;Heunggongvirae;Uroviricota;Caudoviricetes	dsDNA	Prokaryote	Duplodnaviria	Heunggongvirae	Uroviricota	Caudoviricetes
SM1000_MG_virome_scaffold_11_c1	SM1000_MG_virome_scaffold_11_c1	MG_virome	yes	254655	No	482	46	8	Medium-quality	Genome-fragment	87.84	HMM-based (lower-bound)	1		11	0.9728	5	118.412	Viruses;Duplodnaviria;Heunggongvirae;Uroviricota;Caudoviricetes	dsDNA	Prokaryote	Duplodnaviria	Heunggongvirae	Uroviricota	Caudoviricetes
SM1000_MG_virome_scaffold_110_c4	SM1000_MG_virome_scaffold_110_c4	MG_virome	yes	52534	No	111	10	3	Low-quality	Genome-fragment	12.17	AAI-based (high-confidence)	1		11	0.9665	0	21.7715	Viruses;Duplodnaviria;Heunggongvirae;Uroviricota;Caudoviricetes	dsDNA	Prokaryote	Duplodnaviria	Heunggongvirae	Uroviricota	Caudoviricetes
SM1000_MG_virome_scaffold_1100_c1	SM1000_MG_virome_scaffold_1100_c1	MG_virome	yes	39321	No	51	10	0	Low-quality	Genome-fragment	47.67	HMM-based (lower-bound)	1		11	0.972	5	25.6419	Viruses;Duplodnaviria;Heunggongvirae;Uroviricota;Caudoviricetes	dsDNA	Prokaryote	Duplodnaviria	Heunggongvirae	Uroviricota	Caudoviricetes
SM1000_MG_virome_scaffold_1101_c1	SM1000_MG_virome_scaffold_1101_c1	MG_virome	yes	39307	No	67	21	0	Medium-quality	Genome-fragment	66.73	AAI-based (medium-confidence)	1		11	0.9692	3	42.7913	Viruses;Duplodnaviria;Heunggongvirae;Uroviricota;Caudoviricetes	dsDNA	Prokaryote	Duplodnaviria	Heunggongvirae	Uroviricota	Caudoviricetes
SM1000_MG_virome_scaffold_1102_c2	SM1000_MG_virome_scaffold_1102_c2	MG_virome	yes	38955	No	23	2	1	Low-quality	Genome-fragment	40.78	AAI-based (high-confidence)	1		11	0.9751	0	24.19	Viruses;Duplodnaviria;Heunggongvirae;Uroviricota;Caudoviricetes	dsDNA	Prokaryote	Duplodnaviria	Heunggongvirae	Uroviricota	Caudoviricetes
SM1000_MG_virome_scaffold_1103_c3	SM1000_MG_virome_scaffold_1103_c3	MG_virome	yes	23881	No	30	2	0	Low-quality	Genome-fragment	13.88	HMM-based (lower-bound)	1		11	0.9704	0	14.2584	Viruses;Duplodnaviria;Heunggongvirae;Uroviricota;Caudoviricetes	dsDNA	Prokaryote	Duplodnaviria	Heunggongvirae	Uroviricota	Caudoviricetes
SM1000_MG_virome_scaffold_1104_c1	SM1000_MG_virome_scaffold_1104_c1	MG_virome	yes	39283	No	66	4	0	Medium-quality	Genome-fragment	81.43	AAI-based (medium-confidence)	1		11	0.963	4	22.3572	Viruses;Duplodnaviria;Heunggongvirae;Uroviricota;Caudoviricetes	dsDNA	Prokaryote	Duplodnaviria	Heunggongvirae	Uroviricota	Caudoviricetes
SM1000_MG_virome_scaffold_1105_c1	SM1000_MG_virome_scaffold_1105_c1	MG_virome	yes	39264	No	53	7	1	High-quality	High-quality	99.28	AAI-based (high-confidence)	1		11	0.9463	5	31.3647	Viruses;Duplodnaviria;Heunggongvirae;Uroviricota;Caudoviricetes	dsDNA	Prokaryote	Duplodnaviria	Heunggongvirae	Uroviricota	Caudoviricetes
SM1000_MG_virome_scaffold_1108_c1	SM1000_MG_virome_scaffold_1108_c1	MG_virome	yes	20079	No	25	4	0	Medium-quality	Genome-fragment	55.2	AAI-based (high-confidence)	1		11	0.9685	1	18.7451	Viruses;Duplodnaviria;Heunggongvirae;Uroviricota;Caudoviricetes	dsDNA	Prokaryote	Duplodnaviria	Heunggongvirae	Uroviricota	Caudoviricetes
SM1000_MG_virome_scaffold_1109_c1	SM1000_MG_virome_scaffold_1109_c1	MG_virome	yes	14066	No	26	2	0	Low-quality	Genome-fragment	38.53	AAI-based (high-confidence)	1		11	0.9684	1	6.0851	Viruses;Duplodnaviria;Heunggongvirae;Uroviricota;Caudoviricetes	dsDNA	Prokaryote	Duplodnaviria	Heunggongvirae	Uroviricota	Caudoviricetes
SM1000_MG_virome_scaffold_1109_c5	SM1000_MG_virome_scaffold_1109_c5	MG_virome	yes	11495	No	9	1	0	Low-quality	Genome-fragment	31.88	AAI-based (medium-confidence)	1		11	0.9766	0	6.7069	Viruses;Duplodnaviria;Heunggongvirae;Uroviricota;Caudoviricetes	dsDNA	Prokaryote	Duplodnaviria	Heunggongvirae	Uroviricota	Caudoviricetes
SM1000_MG_virome_scaffold_111_c1_1|1-90914/96616	SM1000_MG_virome_scaffold_111_c1_1|1-90914/96616	MG_virome	yes	90914	Yes	139	14	4	Medium-quality	Genome-fragment	85.17	HMM-based (lower-bound)	1.01	1-90914	11	0.9628	5	46.3003	Viruses;Duplodnaviria;Heunggongvirae;Uroviricota;Caudoviricetes	dsDNA	Prokaryote	Duplodnaviria	Heunggongvirae	Uroviricota	Caudoviricetes
SM1000_MG_virome_scaffold_1110_c1	SM1000_MG_virome_scaffold_1110_c1	MG_virome	yes	35815	No	57	5	1	Low-quality	Genome-fragment	49.53	HMM-based (lower-bound)	1		11	0.9585	5	18.5974	Viruses;Duplodnaviria;Heunggongvirae;Uroviricota;Caudoviricetes	dsDNA	Prokaryote	Duplodnaviria	Heunggongvirae	Uroviricota	Caudoviricetes
SM1000_MG_virome_scaffold_1111_c1	SM1000_MG_virome_scaffold_1111_c1	MG_virome	yes	39175	No	71	18	0	Complete	High-quality	100	DTR (high-confidence)	1		11	0.9767	7	53.5555	Viruses;Duplodnaviria;Heunggongvirae;Uroviricota;Caudoviricetes	dsDNA	Prokaryote	Duplodnaviria	Heunggongvirae	Uroviricota	Caudoviricetes
SM1000_MG_virome_scaffold_1113_c1	SM1000_MG_virome_scaffold_1113_c1,SM1005_MG_virome_scaffold_421_c1	MG_virome	yes	39158	No	44	5	1	Low-quality	Genome-fragment	36.54	HMM-based (lower-bound)	1		11	0.9562	3	14.8421	Viruses;Duplodnaviria;Heunggongvirae;Uroviricota;Caudoviricetes	dsDNA	Prokaryote	Duplodnaviria	Heunggongvirae	Uroviricota	Caudoviricetes
SM1000_MG_virome_scaffold_1114_c1	SM1000_MG_virome_scaffold_1114_c1	MG_virome	yes	20567	No	48	8	0	Medium-quality	Genome-fragment	63.73	AAI-based (medium-confidence)	1		11	0.9706	4	19.1637	Viruses;Duplodnaviria;Heunggongvirae;Uroviricota;Caudoviricetes	dsDNA	Prokaryote	Duplodnaviria	Heunggongvirae	Uroviricota	Caudoviricetes
SM1000_MG_virome_scaffold_1114_c3	SM1000_MG_virome_scaffold_1114_c3	MG_virome	yes	12189	No	12	1	0	Low-quality	Genome-fragment	22.15	AAI-based (medium-confidence)	1		11	0.9787	1	8.0723	Viruses;Duplodnaviria;Heunggongvirae;Uroviricota;Caudoviricetes	dsDNA	Prokaryote	Duplodnaviria	Heunggongvirae	Uroviricota	Caudoviricetes
SM1000_MG_virome_scaffold_1115_c4	SM1000_MG_virome_scaffold_1115_c4	MG_virome	yes	25655	No	32	16	0	Medium-quality	Genome-fragment	67.15	AAI-based (high-confidence)	1		11	0.9826	4	43.8394	Viruses;Duplodnaviria;Heunggongvirae;Uroviricota;Caudoviricetes	dsDNA	Prokaryote	Duplodnaviria	Heunggongvirae	Uroviricota	Caudoviricetes
SM1000_MG_virome_scaffold_1116_c1	SM1000_MG_virome_scaffold_1116_c1	MG_virome	yes	27375	No	37	2	0	Low-quality	Genome-fragment	17.07	HMM-based (lower-bound)	1		11	0.8985	0	8.4024	Viruses;Duplodnaviria;Heunggongvirae;Uroviricota;Caudoviricetes	dsDNA	Prokaryote	Duplodnaviria	Heunggongvirae	Uroviricota	Caudoviricetes
SM1000_MG_virome_scaffold_1116_c2	SM1000_MG_virome_scaffold_1116_c2	MG_virome	yes	11753	No	15	2	0	Low-quality	Genome-fragment	15.22	HMM-based (lower-bound)	1		11	0.7468	0	2.7687	Viruses;Duplodnaviria;Heunggongvirae;Uroviricota;Caudoviricetes	dsDNA	Prokaryote	Duplodnaviria	Heunggongvirae	Uroviricota	Caudoviricetes
SM1000_MG_virome_scaffold_1117_c1	SM1000_MG_virome_scaffold_1117_c1	MG_virome	yes	39135	No	56	2	0	Medium-quality	Genome-fragment	62.71	HMM-based (lower-bound)	1		11	0.9786	4	35.3566	Viruses;Duplodnaviria;Heunggongvirae;Uroviricota;Caudoviricetes	dsDNA	Prokaryote	Duplodnaviria	Heunggongvirae	Uroviricota	Caudoviricetes
SM1000_MG_virome_scaffold_1118_c1	SM1000_MG_virome_scaffold_1118_c1	MG_virome	yes	39122	No	53	5	1	Medium-quality	Genome-fragment	81.02	AAI-based (medium-confidence)	1.01		11	0.95	2	14.8315	Viruses;Duplodnaviria;Heunggongvirae;Uroviricota;Caudoviricetes	dsDNA	Prokaryote	Duplodnaviria	Heunggongvirae	Uroviricota	Caudoviricetes
SM1000_MG_virome_scaffold_1119_c2	SM1000_MG_virome_scaffold_1119_c2	MG_virome	yes	33583	No	64	6	0	Low-quality	Genome-fragment	17.54	AAI-based (high-confidence)	1		11	0.9696	2	13.3076	Viruses;Duplodnaviria;Heunggongvirae;Uroviricota;Caudoviricetes	dsDNA	Prokaryote	Duplodnaviria	Heunggongvirae	Uroviricota	Caudoviricetes
SM1000_MG_virome_scaffold_1120_c1	SM1000_MG_virome_scaffold_1120_c1	MG_virome	yes	39112	No	76	18	1	Complete	High-quality	100	DTR (high-confidence)	1		11	0.9732	7	56.7349	Viruses;Duplodnaviria;Heunggongvirae;Uroviricota;Caudoviricetes	dsDNA	Prokaryote	Duplodnaviria	Heunggongvirae	Uroviricota	Caudoviricetes
SM1000_MG_virome_scaffold_1121_c1	SM1000_MG_virome_scaffold_1121_c1,SM1050_MG_virome_scaffold_961_c1,SM1004_MG_virome_scaffold_525_c1,SM1031_MG_virome_scaffold_1457_c1,SM1005_MG_virome_scaffold_1443_c1	MG_virome	yes	39085	No	57	25	0	Medium-quality	Genome-fragment	83.47	AAI-based (medium-confidence)	1		11	0.9355	8	41.8321	Viruses;Duplodnaviria;Heunggongvirae;Uroviricota;Caudoviricetes	dsDNA	Prokaryote	Duplodnaviria	Heunggongvirae	Uroviricota	Caudoviricetes
SM1000_MG_virome_scaffold_1122_c1	SM1000_MG_virome_scaffold_1122_c1	MG_virome	yes	39077	No	59	4	1	High-quality	High-quality	100	AAI-based (medium-confidence)	1.01		11	0.9677	7	23.5618	Viruses;Duplodnaviria;Heunggongvirae;Uroviricota;Caudoviricetes	dsDNA	Prokaryote	Duplodnaviria	Heunggongvirae	Uroviricota	Caudoviricetes
SM1000_MG_virome_scaffold_1123_c2	SM1000_MG_virome_scaffold_1123_c2	MG_virome	yes	35048	No	71	6	0	Medium-quality	Genome-fragment	73.47	AAI-based (medium-confidence)	1		11	0.9638	1	21.3642	Viruses;Duplodnaviria;Heunggongvirae;Uroviricota;Caudoviricetes	dsDNA	Prokaryote	Duplodnaviria	Heunggongvirae	Uroviricota	Caudoviricetes
SM1000_MG_virome_scaffold_1124_c1	SM1000_MG_virome_scaffold_1124_c1	MG_virome	yes	39068	No	56	24	0	High-quality	High-quality	100	AAI-based (high-confidence)	1		11	0.9686	9	55.7383	Viruses;Duplodnaviria;Heunggongvirae;Uroviricota;Caudoviricetes	dsDNA	Prokaryote	Duplodnaviria	Heunggongvirae	Uroviricota	Caudoviricetes
SM1000_MG_virome_scaffold_1126_c1	SM1000_MG_virome_scaffold_1126_c1	MG_virome	yes	39050	No	68	17	2	High-quality	High-quality	100	AAI-based (high-confidence)	1.01		11	0.9787	5	45.1002	Viruses;Duplodnaviria;Heunggongvirae;Uroviricota;Caudoviricetes	dsDNA	Prokaryote	Duplodnaviria	Heunggongvirae	Uroviricota	Caudoviricetes
SM1000_MG_virome_scaffold_1127_c2	SM1000_MG_virome_scaffold_1127_c2	MG_virome	yes	25849	No	34	5	2	Low-quality	Genome-fragment	41.25	AAI-based (medium-confidence)	1		11	0.976	4	18.2034	Viruses;Duplodnaviria;Heunggongvirae;Uroviricota;Caudoviricetes	dsDNA	Prokaryote	Duplodnaviria	Heunggongvirae	Uroviricota	Caudoviricetes
SM1000_MG_virome_scaffold_1128_c1	SM1000_MG_virome_scaffold_1128_c1	MG_virome	yes	39021	No	59	7	0	Medium-quality	Genome-fragment	87.17	AAI-based (medium-confidence)	1		11	0.9629	3	18.5079	Viruses;Duplodnaviria;Heunggongvirae;Uroviricota;Caudoviricetes	dsDNA	Prokaryote	Duplodnaviria	Heunggongvirae	Uroviricota	Caudoviricetes
SM1000_MG_virome_scaffold_1129_c1	SM1000_MG_virome_scaffold_1129_c1	MG_virome	yes	39019	No	61	8	0	Complete	High-quality	100	DTR (high-confidence)	1		11	0.9786	5	41.195	Viruses;Duplodnaviria;Heunggongvirae;Uroviricota;Caudoviricetes	dsDNA	Prokaryote	Duplodnaviria	Heunggongvirae	Uroviricota	Caudoviricetes
SM1000_MG_virome_scaffold_113_c1	SM1000_MG_virome_scaffold_113_c1	MG_virome	yes	96172	No	124	11	2	Complete	High-quality	100	DTR (high-confidence)	1		11	0.9604	4	30.6745	Viruses;Duplodnaviria;Heunggongvirae;Uroviricota;Caudoviricetes	dsDNA	Prokaryote	Duplodnaviria	Heunggongvirae	Uroviricota	Caudoviricetes
SM1000_MG_virome_scaffold_1130_c1	SM1000_MG_virome_scaffold_1130_c1	MG_virome	yes	39016	No	57	8	0	Complete	High-quality	100	DTR (medium-confidence)	1.01		11	0.9615	4	39.9768	Viruses;Duplodnaviria;Heunggongvirae;Uroviricota;Caudoviricetes	dsDNA	Prokaryote	Duplodnaviria	Heunggongvirae	Uroviricota	Caudoviricetes
SM1000_MG_virome_scaffold_1131_c1	SM1000_MG_virome_scaffold_1131_c1	MG_virome	yes	39000	No	64	8	1	High-quality	High-quality	100	AAI-based (medium-confidence)	1		11	0.9398	6	37.8765	Viruses;Duplodnaviria;Heunggongvirae;Uroviricota;Caudoviricetes	dsDNA	Prokaryote	Duplodnaviria	Heunggongvirae	Uroviricota	Caudoviricetes
SM1000_MG_virome_scaffold_1132_c1	SM1000_MG_virome_scaffold_1132_c1	MG_virome	yes	38996	No	53	13	3	Low-quality	Genome-fragment	22.04	AAI-based (medium-confidence)	1		11	0.9663	6	39.6815	Viruses;Duplodnaviria;Heunggongvirae;Uroviricota;Caudoviricetes	dsDNA	Prokaryote	Duplodnaviria	Heunggongvirae	Uroviricota	Caudoviricetes
SM1000_MG_virome_scaffold_1133_c1	SM1000_MG_virome_scaffold_1133_c1	MG_virome	yes	38976	No	93	5	1	Low-quality	Genome-fragment	13.83	HMM-based (lower-bound)	1		11	0.9441	0	6.4411	Viruses;Duplodnaviria;Heunggongvirae;Uroviricota;Caudoviricetes	dsDNA	Prokaryote	Duplodnaviria	Heunggongvirae	Uroviricota	Caudoviricetes
SM1000_MG_virome_scaffold_1134_c2	SM1000_MG_virome_scaffold_1134_c2	MG_virome	yes	11821	No	25	1	0	Low-quality	Genome-fragment	5.22	HMM-based (lower-bound)	1		11	0.9722	0	6.4082	Viruses;Duplodnaviria;Heunggongvirae;Uroviricota;Caudoviricetes	dsDNA	Prokaryote	Duplodnaviria	Heunggongvirae	Uroviricota	Caudoviricetes
SM1000_MG_virome_scaffold_1134_c3	SM1000_MG_virome_scaffold_1134_c3	MG_virome	yes	16698	No	19	2	0	Low-quality	Genome-fragment	17.55	HMM-based (lower-bound)	1		11	0.9773	1	5.746	Viruses;Duplodnaviria;Heunggongvirae;Uroviricota;Caudoviricetes	dsDNA	Prokaryote	Duplodnaviria	Heunggongvirae	Uroviricota	Caudoviricetes
SM1000_MG_virome_scaffold_1135_c1	SM1000_MG_virome_scaffold_1135_c1	MG_virome	yes	33081	No	48	10	4	High-quality	High-quality	92.04	AAI-based (medium-confidence)	1		11	0.9599	3	27.0357	Viruses;Duplodnaviria;Heunggongvirae;Uroviricota;Caudoviricetes	dsDNA	Prokaryote	Duplodnaviria	Heunggongvirae	Uroviricota	Caudoviricetes
SM1000_MG_virome_scaffold_1136_c1	SM1000_MG_virome_scaffold_1136_c1	MG_virome	yes	38960	No	58	6	0	High-quality	High-quality	100	AAI-based (medium-confidence)	1.01		11	0.9694	3	26.6006	Viruses;Duplodnaviria;Heunggongvirae;Uroviricota;Caudoviricetes	dsDNA	Prokaryote	Duplodnaviria	Heunggongvirae	Uroviricota	Caudoviricetes
SM1000_MG_virome_scaffold_1137_c1	SM1000_MG_virome_scaffold_1137_c1	MG_virome	yes	38920	No	60	9	1	High-quality	High-quality	100	AAI-based (medium-confidence)	1		11	0.9545	4	26.8468	Viruses;Duplodnaviria;Heunggongvirae;Uroviricota;Caudoviricetes	dsDNA	Prokaryote	Duplodnaviria	Heunggongvirae	Uroviricota	Caudoviricetes
SM1000_MG_virome_scaffold_1138_c1	SM1000_MG_virome_scaffold_1138_c1	MG_virome	yes	38920	No	62	21	0	High-quality	High-quality	99.72	AAI-based (medium-confidence)	1		11	0.9818	14	47.992	Viruses;Duplodnaviria;Heunggongvirae;Uroviricota;Caudoviricetes	dsDNA	Prokaryote	Duplodnaviria	Heunggongvirae	Uroviricota	Caudoviricetes
SM1000_MG_virome_scaffold_1139_c1	SM1000_MG_virome_scaffold_1139_c1	MG_virome	yes	38894	No	60	19	2	Medium-quality	Genome-fragment	53.21	HMM-based (lower-bound)	1		11	0.9589	6	38.7624	Viruses;Duplodnaviria;Heunggongvirae;Uroviricota;Caudoviricetes	dsDNA	Prokaryote	Duplodnaviria	Heunggongvirae	Uroviricota	Caudoviricetes
SM1000_MG_virome_scaffold_114_c1	SM1000_MG_virome_scaffold_114_c1	MG_virome	yes	72729	No	116	74	0	Medium-quality	Genome-fragment	76.48	AAI-based (high-confidence)	1		11	0.9813	14	126.679	Viruses;Duplodnaviria;Heunggongvirae;Uroviricota;Caudoviricetes	dsDNA	Prokaryote	Duplodnaviria	Heunggongvirae	Uroviricota	Caudoviricetes
SM1000_MG_virome_scaffold_114_c2	SM1000_MG_virome_scaffold_114_c2	MG_virome	yes	15362	No	30	10	1	Low-quality	Genome-fragment	16.12	AAI-based (high-confidence)	1		11	0.9781	0	14.8527	Viruses;Duplodnaviria;Heunggongvirae;Uroviricota;Caudoviricetes	dsDNA	Prokaryote	Duplodnaviria	Heunggongvirae	Uroviricota	Caudoviricetes
SM1000_MG_virome_scaffold_1140_c1|provirus_3_37158	SM1000_MG_virome_scaffold_1140_c1|provirus_3_37158	MG_virome	yes	37156	Yes	52	23	0	Medium-quality	Genome-fragment	88.96	AAI-based (medium-confidence)	1	3-37158	11	0.9611	8	50.7271	Viruses;Duplodnaviria;Heunggongvirae;Uroviricota;Caudoviricetes	dsDNA	Prokaryote	Duplodnaviria	Heunggongvirae	Uroviricota	Caudoviricetes
SM1000_MG_virome_scaffold_1141_c1	SM1000_MG_virome_scaffold_1141_c1,SM1004_MG_virome_scaffold_392_c1	MG_virome	yes	38879	No	58	15	1	Complete	High-quality	100	DTR (high-confidence)	1		11	0.9533	5	31.0066	Viruses;Duplodnaviria;Heunggongvirae;Uroviricota;Caudoviricetes	dsDNA	Prokaryote	Duplodnaviria	Heunggongvirae	Uroviricota	Caudoviricetes
SM1000_MG_virome_scaffold_1142_c1	SM1000_MG_virome_scaffold_1142_c1,SM1029_MG_virome_scaffold_191_c1	MG_virome	yes	38871	No	73	14	1	Medium-quality	Genome-fragment	53.07	HMM-based (lower-bound)	1		11	0.9712	6	34.4285	Viruses;Duplodnaviria;Heunggongvirae;Uroviricota;Caudoviricetes	dsDNA	Prokaryote	Duplodnaviria	Heunggongvirae	Uroviricota	Caudoviricetes
SM1000_MG_virome_scaffold_1143_c1	SM1000_MG_virome_scaffold_1143_c1	MG_virome	yes	38827	No	60	5	1	Complete	High-quality	100	DTR (high-confidence)	1		11	0.9581	5	18.2651	Viruses;Duplodnaviria;Heunggongvirae;Uroviricota;Caudoviricetes	dsDNA	Prokaryote	Duplodnaviria	Heunggongvirae	Uroviricota	Caudoviricetes
SM1000_MG_virome_scaffold_1144_c1	SM1000_MG_virome_scaffold_1144_c1	MG_virome	yes	38812	No	56	7	0	Complete	High-quality	100	DTR (high-confidence)	1		11	0.9695	2	29.5271	Viruses;Duplodnaviria;Heunggongvirae;Uroviricota;Caudoviricetes	dsDNA	Prokaryote	Duplodnaviria	Heunggongvirae	Uroviricota	Caudoviricetes
SM1000_MG_virome_scaffold_1145_c1	SM1000_MG_virome_scaffold_1145_c1	MG_virome	yes	38783	No	67	20	1	Medium-quality	Genome-fragment	56.42	HMM-based (lower-bound)	1		11	0.967	7	38.5828	Viruses;Duplodnaviria;Heunggongvirae;Uroviricota;Caudoviricetes	dsDNA	Prokaryote	Duplodnaviria	Heunggongvirae	Uroviricota	Caudoviricetes
SM1000_MG_virome_scaffold_1146_c1	SM1000_MG_virome_scaffold_1146_c1,SM1050_MG_virome_scaffold_774_c3,SM1005_MG_virome_scaffold_1103_c1,SM1004_MG_virome_scaffold_411_c2	MG_virome	yes	37183	No	58	9	0	Medium-quality	Genome-fragment	79.52	AAI-based (medium-confidence)	1		11	0.9731	2	24.6389	Viruses;Duplodnaviria;Heunggongvirae;Uroviricota;Caudoviricetes	dsDNA	Prokaryote	Duplodnaviria	Heunggongvirae	Uroviricota	Caudoviricetes
SM1000_MG_virome_scaffold_1147_c3	SM1000_MG_virome_scaffold_1147_c3	MG_virome	yes	16121	No	21	7	0	Low-quality	Genome-fragment	12	AAI-based (medium-confidence)	1		11	0.9811	1	24.7853	Viruses;Duplodnaviria;Heunggongvirae;Uroviricota;Caudoviricetes	dsDNA	Prokaryote	Duplodnaviria	Heunggongvirae	Uroviricota	Caudoviricetes
SM1000_MG_virome_scaffold_1148_c1	SM1000_MG_virome_scaffold_1148_c1	MG_virome	yes	12166	No	22	4	0	Low-quality	Genome-fragment	26.6	AAI-based (medium-confidence)	1		11	0.9602	2	7.5359	Viruses;Duplodnaviria;Heunggongvirae;Uroviricota;Caudoviricetes	dsDNA	Prokaryote	Duplodnaviria	Heunggongvirae	Uroviricota	Caudoviricetes
SM1000_MG_virome_scaffold_1149_c5	SM1000_MG_virome_scaffold_1149_c5	MG_virome	yes	28769	No	56	29	0	Low-quality	Genome-fragment	29.29	AAI-based (high-confidence)	1		11	0.9825	0	62.1124	Viruses;Duplodnaviria;Heunggongvirae;Uroviricota;Caudoviricetes	dsDNA	Prokaryote	Duplodnaviria	Heunggongvirae	Uroviricota	Caudoviricetes
SM1000_MG_virome_scaffold_115_c1	SM1000_MG_virome_scaffold_115_c1	MG_virome	yes	31041	No	54	6	0	Low-quality	Genome-fragment	33.91	AAI-based (high-confidence)	1		11	0.9756	3	45.1261	Viruses;Duplodnaviria;Heunggongvirae;Uroviricota;Caudoviricetes	dsDNA	Prokaryote	Duplodnaviria	Heunggongvirae	Uroviricota	Caudoviricetes
SM1000_MG_virome_scaffold_1150_c4	SM1000_MG_virome_scaffold_1150_c4	MG_virome	yes	20607	No	47	6	0	Low-quality	Genome-fragment	14.44	AAI-based (medium-confidence)	1		11	0.9697	1	21.0233	Viruses;Duplodnaviria;Heunggongvirae;Uroviricota;Caudoviricetes	dsDNA	Prokaryote	Duplodnaviria	Heunggongvirae	Uroviricota	Caudoviricetes
SM1000_MG_virome_scaffold_1151_c1	SM1000_MG_virome_scaffold_1151_c1	MG_virome	yes	38668	No	61	8	1	Low-quality	Genome-fragment	32.82	HMM-based (lower-bound)	1		11	0.9747	7	20.0781	Viruses;Duplodnaviria;Heunggongvirae;Uroviricota;Caudoviricetes	dsDNA	Prokaryote	Duplodnaviria	Heunggongvirae	Uroviricota	Caudoviricetes
SM1000_MG_virome_scaffold_1152_c1	SM1000_MG_virome_scaffold_1152_c1	MG_virome	yes	38668	No	70	14	0	Complete	High-quality	100	DTR (high-confidence)	1.01		11	0.9788	7	46.4871	Viruses;Duplodnaviria;Heunggongvirae;Uroviricota;Caudoviricetes	dsDNA	Prokaryote	Duplodnaviria	Heunggongvirae	Uroviricota	Caudoviricetes
SM1000_MG_virome_scaffold_1153_c1	SM1000_MG_virome_scaffold_1153_c1	MG_virome	yes	38664	No	85	10	1	Medium-quality	Genome-fragment	60.83	HMM-based (lower-bound)	1		11	0.9783	5	40.4991	Viruses;Duplodnaviria;Heunggongvirae;Uroviricota;Caudoviricetes	dsDNA	Prokaryote	Duplodnaviria	Heunggongvirae	Uroviricota	Caudoviricetes
SM1000_MG_virome_scaffold_1155_c1	SM1000_MG_virome_scaffold_1155_c1	MG_virome	yes	37520	No	58	7	0	Medium-quality	Genome-fragment	73.57	AAI-based (medium-confidence)	1		11	0.9643	5	36.3897	Viruses;Duplodnaviria;Heunggongvirae;Uroviricota;Caudoviricetes	dsDNA	Prokaryote	Duplodnaviria	Heunggongvirae	Uroviricota	Caudoviricetes
SM1000_MG_virome_scaffold_1156_c1	SM1000_MG_virome_scaffold_1156_c1	MG_virome	yes	38623	No	66	7	6	Complete	High-quality	100	DTR (high-confidence)	1		11	0.9073	6	16.9712	Viruses;Duplodnaviria;Heunggongvirae;Uroviricota;Caudoviricetes	dsDNA	Prokaryote	Duplodnaviria	Heunggongvirae	Uroviricota	Caudoviricetes
SM1000_MG_virome_scaffold_1157_c8	SM1000_MG_virome_scaffold_1157_c8	MG_virome	yes	10196	No	17	2	0	Low-quality	Genome-fragment	27.59	AAI-based (medium-confidence)	1		11	0.7734	0	5	Viruses;Duplodnaviria;Heunggongvirae;Uroviricota;Caudoviricetes	dsDNA	Prokaryote	Duplodnaviria	Heunggongvirae	Uroviricota	Caudoviricetes
SM1000_MG_virome_scaffold_1158_c1	SM1000_MG_virome_scaffold_1158_c1	MG_virome	yes	38607	No	52	9	0	Complete	High-quality	100	DTR (medium-confidence)	1		11	0.9783	5	32.1345	Viruses;Duplodnaviria;Heunggongvirae;Uroviricota;Caudoviricetes	dsDNA	Prokaryote	Duplodnaviria	Heunggongvirae	Uroviricota	Caudoviricetes
SM1000_MG_virome_scaffold_1159_c1	SM1000_MG_virome_scaffold_1159_c1	MG_virome	yes	10824	No	22	8	0	Low-quality	Genome-fragment	18.13	AAI-based (medium-confidence)	1.01		11	0.9795	1	12.9547	Viruses;Duplodnaviria;Heunggongvirae;Uroviricota;Caudoviricetes	dsDNA	Prokaryote	Duplodnaviria	Heunggongvirae	Uroviricota	Caudoviricetes
SM1000_MG_virome_scaffold_1159_c7	SM1000_MG_virome_scaffold_1159_c7	MG_virome	yes	10059	No	12	7	0	Low-quality	Genome-fragment	16.78	AAI-based (high-confidence)	1		11	0.9754	0	12.2287	Viruses;Duplodnaviria;Heunggongvirae;Uroviricota;Caudoviricetes	dsDNA	Prokaryote	Duplodnaviria	Heunggongvirae	Uroviricota	Caudoviricetes
SM1000_MG_virome_scaffold_116_c1	SM1000_MG_virome_scaffold_116_c1	MG_virome	yes	22131	No	39	5	0	Low-quality	Genome-fragment	12.66	AAI-based (medium-confidence)	1		11	0.9725	0	6.35	Viruses;Duplodnaviria;Heunggongvirae;Uroviricota;Caudoviricetes	dsDNA	Prokaryote	Duplodnaviria	Heunggongvirae	Uroviricota	Caudoviricetes
SM1000_MG_virome_scaffold_116_c2	SM1000_MG_virome_scaffold_116_c2	MG_virome	yes	73633	No	77	13	3	Low-quality	Genome-fragment	42.67	AAI-based (high-confidence)	1		11	0.9755	7	32.9405	Viruses;Duplodnaviria;Heunggongvirae;Uroviricota;Caudoviricetes	dsDNA	Prokaryote	Duplodnaviria	Heunggongvirae	Uroviricota	Caudoviricetes
SM1000_MG_virome_scaffold_1160_c1	SM1000_MG_virome_scaffold_1160_c1	MG_virome	yes	38595	No	39	10	0	Medium-quality	Genome-fragment	74.32	HMM-based (lower-bound)	1		11	0.9821	4	37.2026	Viruses;Duplodnaviria;Heunggongvirae;Uroviricota;Caudoviricetes	dsDNA	Prokaryote	Duplodnaviria	Heunggongvirae	Uroviricota	Caudoviricetes
SM1000_MG_virome_scaffold_1161_c1	SM1000_MG_virome_scaffold_1161_c1	MG_virome	yes	38551	No	65	9	1	Complete	High-quality	100	DTR (high-confidence)	1		11	0.9762	4	47.7198	Viruses;Duplodnaviria;Heunggongvirae;Uroviricota;Caudoviricetes	dsDNA	Prokaryote	Duplodnaviria	Heunggongvirae	Uroviricota	Caudoviricetes
SM1000_MG_virome_scaffold_1162_c2	SM1000_MG_virome_scaffold_1162_c2,SM1027_MG_virome_scaffold_324_c2,SM1050_MG_virome_scaffold_3441_c1,SM1028_MG_virome_scaffold_786_c1	MG_virome	yes	32830	No	50	12	1	Medium-quality	Genome-fragment	57.42	AAI-based (medium-confidence)	1		11	0.9365	2	17.7291	Viruses;Duplodnaviria;Heunggongvirae;Uroviricota;Caudoviricetes	dsDNA	Prokaryote	Duplodnaviria	Heunggongvirae	Uroviricota	Caudoviricetes
SM1000_MG_virome_scaffold_1165_c4	SM1000_MG_virome_scaffold_1165_c4	MG_virome	yes	24428	No	31	1	0	Medium-quality	Genome-fragment	55.99	AAI-based (medium-confidence)	1		11	0.9553	1	7.4121	Viruses;Duplodnaviria;Heunggongvirae;Uroviricota;Caudoviricetes	dsDNA	Prokaryote	Duplodnaviria	Heunggongvirae	Uroviricota	Caudoviricetes
SM1000_MG_virome_scaffold_1166_c1	SM1000_MG_virome_scaffold_1166_c1	MG_virome	yes	38502	No	61	6	0	High-quality	High-quality	100	AAI-based (medium-confidence)	1		11	0.9264	3	7.7738	Viruses;Duplodnaviria;Heunggongvirae;Uroviricota;Caudoviricetes	dsDNA	Prokaryote	Duplodnaviria	Heunggongvirae	Uroviricota	Caudoviricetes
SM1000_MG_virome_scaffold_1167_c1	SM1000_MG_virome_scaffold_1167_c1	MG_virome	yes	38477	No	61	16	0	Medium-quality	Genome-fragment	59.18	HMM-based (lower-bound)	1		11	0.9744	8	41.4077	Viruses;Duplodnaviria;Heunggongvirae;Uroviricota;Caudoviricetes	dsDNA	Prokaryote	Duplodnaviria	Heunggongvirae	Uroviricota	Caudoviricetes
SM1000_MG_virome_scaffold_1168_c2	SM1000_MG_virome_scaffold_1168_c2	MG_virome	yes	24564	No	43	9	0	Low-quality	Genome-fragment	23.31	HMM-based (lower-bound)	1		11	0.9738	2	21.7939	Viruses;Duplodnaviria;Heunggongvirae;Uroviricota;Caudoviricetes	dsDNA	Prokaryote	Duplodnaviria	Heunggongvirae	Uroviricota	Caudoviricetes
SM1000_MG_virome_scaffold_1169_c4	SM1000_MG_virome_scaffold_1169_c4	MG_virome	yes	11693	No	18	2	2	Low-quality	Genome-fragment	8.87	HMM-based (lower-bound)	1		11	0.888	0	3.7096	Viruses;Duplodnaviria;Heunggongvirae;Uroviricota;Caudoviricetes	dsDNA	Prokaryote	Duplodnaviria	Heunggongvirae	Uroviricota	Caudoviricetes
SM1000_MG_virome_scaffold_117_c1	SM1000_MG_virome_scaffold_117_c1	MG_virome	yes	95664	No	150	17	3	Low-quality	Genome-fragment	26.75	AAI-based (medium-confidence)	1		11	0.8866	0	69.5876	Viruses;Duplodnaviria;Heunggongvirae;Uroviricota;Caudoviricetes	dsDNA	Prokaryote	Duplodnaviria	Heunggongvirae	Uroviricota	Caudoviricetes
SM1000_MG_virome_scaffold_1171_c1	SM1000_MG_virome_scaffold_1171_c1	MG_virome	yes	38424	No	71	24	0	High-quality	High-quality	100	AAI-based (medium-confidence)	1		11	0.9802	10	49.0006	Viruses;Duplodnaviria;Heunggongvirae;Uroviricota;Caudoviricetes	dsDNA	Prokaryote	Duplodnaviria	Heunggongvirae	Uroviricota	Caudoviricetes
SM1000_MG_virome_scaffold_1172_c1	SM1000_MG_virome_scaffold_1172_c1	MG_virome	yes	38406	No	69	10	0	Low-quality	Genome-fragment	37.91	HMM-based (lower-bound)	1		11	0.9589	5	30.6854	Viruses;Duplodnaviria;Heunggongvirae;Uroviricota;Caudoviricetes	dsDNA	Prokaryote	Duplodnaviria	Heunggongvirae	Uroviricota	Caudoviricetes
SM1000_MG_virome_scaffold_1173_c1	SM1000_MG_virome_scaffold_1173_c1	MG_virome	yes	38392	No	43	4	0	High-quality	High-quality	100	AAI-based (medium-confidence)	1		11	0.9807	4	16.7477	Viruses;Duplodnaviria;Heunggongvirae;Uroviricota;Caudoviricetes	dsDNA	Prokaryote	Duplodnaviria	Heunggongvirae	Uroviricota	Caudoviricetes
SM1000_MG_virome_scaffold_1174_c1	SM1000_MG_virome_scaffold_1174_c1	MG_virome	yes	38377	No	62	2	1	Low-quality	Genome-fragment	46.4	HMM-based (lower-bound)	1		11	0.9413	4	20.6212	Viruses;Duplodnaviria;Heunggongvirae;Uroviricota;Caudoviricetes	dsDNA	Prokaryote	Duplodnaviria	Heunggongvirae	Uroviricota	Caudoviricetes
SM1000_MG_virome_scaffold_1177_c3	SM1000_MG_virome_scaffold_1177_c3	MG_virome	yes	24402	No	26	3	1	Medium-quality	Genome-fragment	63.97	AAI-based (medium-confidence)	1		11	0.9444	3	14.3608	Viruses;Duplodnaviria;Heunggongvirae;Uroviricota;Caudoviricetes	dsDNA	Prokaryote	Duplodnaviria	Heunggongvirae	Uroviricota	Caudoviricetes
SM1000_MG_virome_scaffold_1178_c1	SM1000_MG_virome_scaffold_1178_c1	MG_virome	yes	38334	No	70	41	0	High-quality	High-quality	92.28	AAI-based (high-confidence)	1		11	0.9808	8	62.6891	Viruses;Duplodnaviria;Heunggongvirae;Uroviricota;Caudoviricetes	dsDNA	Prokaryote	Duplodnaviria	Heunggongvirae	Uroviricota	Caudoviricetes
SM1000_MG_virome_scaffold_1179_c1	SM1000_MG_virome_scaffold_1179_c1,SM1050_MG_virome_scaffold_862_c2	MG_virome	yes	38324	No	49	12	1	Low-quality	Genome-fragment	43.2	HMM-based (lower-bound)	1		11	0.9757	6	23.6183	Viruses;Duplodnaviria;Heunggongvirae;Uroviricota;Caudoviricetes	dsDNA	Prokaryote	Duplodnaviria	Heunggongvirae	Uroviricota	Caudoviricetes
SM1000_MG_virome_scaffold_1180_c1	SM1000_MG_virome_scaffold_1180_c1	MG_virome	yes	16050	No	32	4	0	Low-quality	Genome-fragment	38.68	AAI-based (medium-confidence)	1		11	0.9745	0	11.5733	Viruses;Duplodnaviria;Heunggongvirae;Uroviricota;Caudoviricetes	dsDNA	Prokaryote	Duplodnaviria	Heunggongvirae	Uroviricota	Caudoviricetes
SM1000_MG_virome_scaffold_1180_c2	SM1000_MG_virome_scaffold_1180_c2	MG_virome	yes	10463	No	15	2	0	Low-quality	Genome-fragment	27.74	AAI-based (medium-confidence)	1		11	0.9525	1	3.0126	Viruses;Duplodnaviria;Heunggongvirae;Uroviricota;Caudoviricetes	dsDNA	Prokaryote	Duplodnaviria	Heunggongvirae	Uroviricota	Caudoviricetes
SM1000_MG_virome_scaffold_1181_c1	SM1000_MG_virome_scaffold_1181_c1	MG_virome	yes	38306	No	54	10	0	Low-quality	Genome-fragment	4.4	HMM-based (lower-bound)	1.01		11	0.9545	0	15.2346	Viruses;Varidnaviria;Bamfordvirae;Nucleocytoviricota;Megaviricetes;Imitervirales;Mimiviridae	dsDNA	Eukaryote	Varidnaviria	Bamfordvirae	Nucleocytoviricota	Megaviricetes	Imitervirales	Mimiviridae
SM1000_MG_virome_scaffold_1182_c2	SM1000_MG_virome_scaffold_1182_c2,SM1031_MG_virome_scaffold_1090_c1,SM1004_MG_virome_scaffold_497_c3,SM1004_MG_virome_scaffold_497_c2	MG_virome	yes	36800	No	58	13	0	High-quality	High-quality	98.45	AAI-based (high-confidence)	1		11	0.9713	5	50.0417	Viruses;Duplodnaviria;Heunggongvirae;Uroviricota;Caudoviricetes	dsDNA	Prokaryote	Duplodnaviria	Heunggongvirae	Uroviricota	Caudoviricetes
SM1000_MG_virome_scaffold_1183_c1	SM1000_MG_virome_scaffold_1183_c1	MG_virome	yes	15202	No	37	3	0	Low-quality	Genome-fragment	12.86	HMM-based (lower-bound)	1		11	0.9677	0	17.0959	Viruses;Duplodnaviria;Heunggongvirae;Uroviricota;Caudoviricetes	dsDNA	Prokaryote	Duplodnaviria	Heunggongvirae	Uroviricota	Caudoviricetes
SM1000_MG_virome_scaffold_1183_c3	SM1000_MG_virome_scaffold_1183_c3	MG_virome	yes	15452	No	32	4	0	Low-quality	Genome-fragment	7.71	HMM-based (lower-bound)	1		11	0.9691	0	14.2848	Viruses;Duplodnaviria;Heunggongvirae;Uroviricota;Caudoviricetes	dsDNA	Prokaryote	Duplodnaviria	Heunggongvirae	Uroviricota	Caudoviricetes
SM1000_MG_virome_scaffold_1184_c1	SM1000_MG_virome_scaffold_1184_c1	MG_virome	yes	38221	No	60	19	0	High-quality	High-quality	92.84	AAI-based (medium-confidence)	1		11	0.975	5	41.1243	Viruses;Duplodnaviria;Heunggongvirae;Uroviricota;Caudoviricetes	dsDNA	Prokaryote	Duplodnaviria	Heunggongvirae	Uroviricota	Caudoviricetes
SM1000_MG_virome_scaffold_1185_c1	SM1000_MG_virome_scaffold_1185_c1	MG_virome	yes	13446	No	24	4	0	Low-quality	Genome-fragment	21.27	AAI-based (medium-confidence)	1		11	0.9779	2	11.4513	Viruses;Duplodnaviria;Heunggongvirae;Uroviricota;Caudoviricetes	dsDNA	Prokaryote	Duplodnaviria	Heunggongvirae	Uroviricota	Caudoviricetes
SM1000_MG_virome_scaffold_1186_c1	SM1000_MG_virome_scaffold_1186_c1	MG_virome	yes	38187	No	58	13	1	High-quality	High-quality	100	AAI-based (medium-confidence)	1		11	0.9781	5	38.3314	Viruses;Duplodnaviria;Heunggongvirae;Uroviricota;Caudoviricetes	dsDNA	Prokaryote	Duplodnaviria	Heunggongvirae	Uroviricota	Caudoviricetes
SM1000_MG_virome_scaffold_1187_c1	SM1000_MG_virome_scaffold_1187_c1	MG_virome	yes	20566	No	32	5	0	Medium-quality	Genome-fragment	55.16	AAI-based (medium-confidence)	1		11	0.9714	4	16.3436	Viruses;Duplodnaviria;Heunggongvirae;Uroviricota;Caudoviricetes	dsDNA	Prokaryote	Duplodnaviria	Heunggongvirae	Uroviricota	Caudoviricetes
SM1000_MG_virome_scaffold_1187_c2	SM1000_MG_virome_scaffold_1187_c2	MG_virome	yes	17597	No	34	5	1	Low-quality	Genome-fragment	34.67	AAI-based (medium-confidence)	1		11	0.9557	1	10.0852	Viruses;Duplodnaviria;Heunggongvirae;Uroviricota;Caudoviricetes	dsDNA	Prokaryote	Duplodnaviria	Heunggongvirae	Uroviricota	Caudoviricetes
SM1000_MG_virome_scaffold_1188_c1	SM1000_MG_virome_scaffold_1188_c1	MG_virome	yes	38132	No	56	16	1	Low-quality	Genome-fragment	49.69	HMM-based (lower-bound)	1		11	0.9724	2	30.1998	Viruses;Duplodnaviria;Heunggongvirae;Uroviricota;Caudoviricetes	dsDNA	Prokaryote	Duplodnaviria	Heunggongvirae	Uroviricota	Caudoviricetes
SM1000_MG_virome_scaffold_1189_c1	SM1000_MG_virome_scaffold_1189_c1,SM1031_MG_virome_scaffold_1009_c1	MG_virome	yes	38073	No	62	10	0	High-quality	High-quality	100	AAI-based (medium-confidence)	1		11	0.9607	3	44.775	Viruses;Duplodnaviria;Heunggongvirae;Uroviricota;Caudoviricetes	dsDNA	Prokaryote	Duplodnaviria	Heunggongvirae	Uroviricota	Caudoviricetes
SM1000_MG_virome_scaffold_119_c1|provirus_3_55037	SM1000_MG_virome_scaffold_119_c1|provirus_3_55037	MG_virome	yes	55035	Yes	79	10	5	Low-quality	Genome-fragment	33.4	HMM-based (lower-bound)	1	3-55037	11	0.959	9	31.5195	Viruses;Duplodnaviria;Heunggongvirae;Uroviricota;Caudoviricetes	dsDNA	Prokaryote	Duplodnaviria	Heunggongvirae	Uroviricota	Caudoviricetes
SM1000_MG_virome_scaffold_119_c1|provirus_60144_95167	SM1000_MG_virome_scaffold_119_c1|provirus_60144_95167	MG_virome	yes	35024	Yes	48	3	0	Low-quality	Genome-fragment	40.71	AAI-based (medium-confidence)	1	60144-95167	11	0.9384	2	10.4388	Viruses;Duplodnaviria;Heunggongvirae;Uroviricota;Caudoviricetes	dsDNA	Prokaryote	Duplodnaviria	Heunggongvirae	Uroviricota	Caudoviricetes
SM1000_MG_virome_scaffold_1190_c1	SM1000_MG_virome_scaffold_1190_c1	MG_virome	yes	23975	No	56	5	0	Low-quality	Genome-fragment	36.88	AAI-based (medium-confidence)	1		11	0.9774	2	22.7483	Viruses;Duplodnaviria;Heunggongvirae;Uroviricota;Caudoviricetes	dsDNA	Prokaryote	Duplodnaviria	Heunggongvirae	Uroviricota	Caudoviricetes
SM1000_MG_virome_scaffold_1191_c2	SM1000_MG_virome_scaffold_1191_c2	MG_virome	yes	19777	No	39	10	0	Low-quality	Genome-fragment	12.74	HMM-based (lower-bound)	1		11	0.9798	2	27.0482	Viruses;Duplodnaviria;Heunggongvirae;Uroviricota;Caudoviricetes	dsDNA	Prokaryote	Duplodnaviria	Heunggongvirae	Uroviricota	Caudoviricetes
SM1000_MG_virome_scaffold_1192_c7	SM1000_MG_virome_scaffold_1192_c7	MG_virome	yes	22734	No	40	15	0	Medium-quality	Genome-fragment	61.38	AAI-based (medium-confidence)	1		11	0.979	11	33.7807	Viruses;Duplodnaviria;Heunggongvirae;Uroviricota;Caudoviricetes	dsDNA	Prokaryote	Duplodnaviria	Heunggongvirae	Uroviricota	Caudoviricetes
SM1000_MG_virome_scaffold_1193_c1	SM1000_MG_virome_scaffold_1193_c1	MG_virome	yes	38024	No	62	11	6	High-quality	High-quality	100	AAI-based (medium-confidence)	1		11	0.9641	5	23.991	Viruses;Duplodnaviria;Heunggongvirae;Uroviricota;Caudoviricetes	dsDNA	Prokaryote	Duplodnaviria	Heunggongvirae	Uroviricota	Caudoviricetes
SM1000_MG_virome_scaffold_1194_c1	SM1000_MG_virome_scaffold_1194_c1	MG_virome	yes	38009	No	56	13	0	Complete	High-quality	100	DTR (high-confidence)	1.01		11	0.9799	5	43.6829	Viruses;Duplodnaviria;Heunggongvirae;Uroviricota;Caudoviricetes	dsDNA	Prokaryote	Duplodnaviria	Heunggongvirae	Uroviricota	Caudoviricetes
SM1000_MG_virome_scaffold_1195_c3	SM1000_MG_virome_scaffold_1195_c3	MG_virome	yes	26379	No	35	9	0	Low-quality	Genome-fragment	34.99	AAI-based (medium-confidence)	1		11	0.9639	5	11.3558	Viruses;Duplodnaviria;Heunggongvirae;Uroviricota;Caudoviricetes	dsDNA	Prokaryote	Duplodnaviria	Heunggongvirae	Uroviricota	Caudoviricetes
SM1000_MG_virome_scaffold_1196_c2	SM1000_MG_virome_scaffold_1196_c2	MG_virome	yes	33462	No	31	4	0	Low-quality	Genome-fragment	32.92	HMM-based (lower-bound)	1		11	0.9484	1	11.2979	Viruses;Duplodnaviria;Heunggongvirae;Uroviricota;Caudoviricetes	dsDNA	Prokaryote	Duplodnaviria	Heunggongvirae	Uroviricota	Caudoviricetes
SM1000_MG_virome_scaffold_1197_c1	SM1000_MG_virome_scaffold_1197_c1	MG_virome	yes	37878	No	58	7	0	Medium-quality	Genome-fragment	50.2	HMM-based (lower-bound)	1		11	0.9541	2	22.2171	Viruses;Duplodnaviria;Heunggongvirae;Uroviricota;Caudoviricetes	dsDNA	Prokaryote	Duplodnaviria	Heunggongvirae	Uroviricota	Caudoviricetes
SM1000_MG_virome_scaffold_1198_c1	SM1000_MG_virome_scaffold_1198_c1,SM1031_MG_virome_scaffold_2726_c1,SM1031_MG_virome_scaffold_4167_c1	MG_virome	yes	37870	No	70	20	0	Medium-quality	Genome-fragment	51.83	HMM-based (lower-bound)	1		11	0.9817	9	61.0385	Viruses;Duplodnaviria;Heunggongvirae;Uroviricota;Caudoviricetes	dsDNA	Prokaryote	Duplodnaviria	Heunggongvirae	Uroviricota	Caudoviricetes
SM1000_MG_virome_scaffold_1199_c2	SM1000_MG_virome_scaffold_1199_c2	MG_virome	yes	13569	No	31	2	0	Low-quality	Genome-fragment	16.05	AAI-based (medium-confidence)	1		11	0.9724	1	10.7659	Viruses;Duplodnaviria;Heunggongvirae;Uroviricota;Caudoviricetes	dsDNA	Prokaryote	Duplodnaviria	Heunggongvirae	Uroviricota	Caudoviricetes
SM1000_MG_virome_scaffold_1199_c4	SM1000_MG_virome_scaffold_1199_c4	MG_virome	yes	10942	No	27	2	1	Low-quality	Genome-fragment	18.88	HMM-based (lower-bound)	1		11	0.9627	0	4.8995	Viruses;Duplodnaviria;Heunggongvirae;Uroviricota;Caudoviricetes	dsDNA	Prokaryote	Duplodnaviria	Heunggongvirae	Uroviricota	Caudoviricetes
SM1000_MG_virome_scaffold_12_c1	SM1000_MG_virome_scaffold_12_c1	MG_virome	yes	39048	No	54	8	7	Low-quality	Genome-fragment	10.43	AAI-based (high-confidence)	1		11	0.9783	2	35.4671	Viruses;Duplodnaviria;Heunggongvirae;Uroviricota;Caudoviricetes	dsDNA	Prokaryote	Duplodnaviria	Heunggongvirae	Uroviricota	Caudoviricetes
SM1000_MG_virome_scaffold_12_c16	SM1000_MG_virome_scaffold_12_c16	MG_virome	yes	34141	No	46	5	0	Low-quality	Genome-fragment	10.38	AAI-based (medium-confidence)	1		11	0.9682	2	46.918	Viruses;Duplodnaviria;Heunggongvirae;Uroviricota;Caudoviricetes	dsDNA	Prokaryote	Duplodnaviria	Heunggongvirae	Uroviricota	Caudoviricetes
SM1000_MG_virome_scaffold_12_c18	SM1000_MG_virome_scaffold_12_c18	MG_virome	yes	19854	No	22	5	1	Low-quality	Genome-fragment	6.1	AAI-based (medium-confidence)	1		11	0.9788	3	19.3944	Viruses;Duplodnaviria;Heunggongvirae;Uroviricota;Caudoviricetes	dsDNA	Prokaryote	Duplodnaviria	Heunggongvirae	Uroviricota	Caudoviricetes
SM1000_MG_virome_scaffold_12_c5	SM1000_MG_virome_scaffold_12_c5	MG_virome	yes	17828	No	30	6	1	Low-quality	Genome-fragment	4.68	AAI-based (medium-confidence)	1		11	0.972	0	14.5083	Viruses;Duplodnaviria;Heunggongvirae;Uroviricota;Caudoviricetes	dsDNA	Prokaryote	Duplodnaviria	Heunggongvirae	Uroviricota	Caudoviricetes
SM1000_MG_virome_scaffold_12_c7|provirus_3_19450	SM1000_MG_virome_scaffold_12_c7|provirus_3_19450	MG_virome	yes	19448	Yes	33	1	0	Low-quality	Genome-fragment	8.24	HMM-based (lower-bound)	1	3-19450	11	0.979	0	10.8103	Viruses;Duplodnaviria;Heunggongvirae;Uroviricota;Caudoviricetes	dsDNA	Prokaryote	Duplodnaviria	Heunggongvirae	Uroviricota	Caudoviricetes
SM1000_MG_virome_scaffold_12_c8	SM1000_MG_virome_scaffold_12_c8	MG_virome	yes	12150	No	30	1	0	Low-quality	Genome-fragment	1.1	HMM-based (lower-bound)	1		11	0.9761	0	8.5763	Viruses;Duplodnaviria;Heunggongvirae;Uroviricota;Caudoviricetes	dsDNA	Prokaryote	Duplodnaviria	Heunggongvirae	Uroviricota	Caudoviricetes
SM1000_MG_virome_scaffold_120_c1	SM1000_MG_virome_scaffold_120_c1	MG_virome	yes	94365	No	138	10	2	Medium-quality	Genome-fragment	72.19	HMM-based (lower-bound)	1		11	0.9613	3	49.7036	Viruses;Duplodnaviria;Heunggongvirae;Uroviricota;Caudoviricetes	dsDNA	Prokaryote	Duplodnaviria	Heunggongvirae	Uroviricota	Caudoviricetes
SM1000_MG_virome_scaffold_1200_c1	SM1000_MG_virome_scaffold_1200_c1	MG_virome	yes	24657	No	45	5	0	Low-quality	Genome-fragment	38.86	AAI-based (medium-confidence)	1		11	0.9777	0	15.4026	Viruses;Duplodnaviria;Heunggongvirae;Uroviricota;Caudoviricetes	dsDNA	Prokaryote	Duplodnaviria	Heunggongvirae	Uroviricota	Caudoviricetes
SM1000_MG_virome_scaffold_1200_c3	SM1000_MG_virome_scaffold_1200_c3	MG_virome	yes	10255	No	15	6	0	Low-quality	Genome-fragment	28.06	AAI-based (high-confidence)	1		11	0.9804	5	10.7139	Viruses;Duplodnaviria;Heunggongvirae;Uroviricota;Caudoviricetes	dsDNA	Prokaryote	Duplodnaviria	Heunggongvirae	Uroviricota	Caudoviricetes
SM1000_MG_virome_scaffold_1201_c1	SM1000_MG_virome_scaffold_1201_c1	MG_virome	yes	37858	No	64	8	0	Complete	High-quality	100	DTR (high-confidence)	1.02		11	0.9643	8	30.2212	Viruses;Duplodnaviria;Heunggongvirae;Uroviricota;Caudoviricetes	dsDNA	Prokaryote	Duplodnaviria	Heunggongvirae	Uroviricota	Caudoviricetes
SM1000_MG_virome_scaffold_1202_c1	SM1000_MG_virome_scaffold_1202_c1	MG_virome	yes	37834	No	60	9	0	Complete	High-quality	100	DTR (high-confidence)	1		11	0.9688	7	37.5766	Viruses;Duplodnaviria;Heunggongvirae;Uroviricota;Caudoviricetes	dsDNA	Prokaryote	Duplodnaviria	Heunggongvirae	Uroviricota	Caudoviricetes
SM1000_MG_virome_scaffold_1203_c2	SM1000_MG_virome_scaffold_1203_c2	MG_virome	yes	33124	No	52	15	0	Medium-quality	Genome-fragment	89.14	AAI-based (high-confidence)	1		11	0.98	7	45.4152	Viruses;Duplodnaviria;Heunggongvirae;Uroviricota;Caudoviricetes	dsDNA	Prokaryote	Duplodnaviria	Heunggongvirae	Uroviricota	Caudoviricetes
SM1000_MG_virome_scaffold_1204_c3	SM1000_MG_virome_scaffold_1204_c3	MG_virome	yes	14098	No	29	4	0	Low-quality	Genome-fragment	17.15	HMM-based (lower-bound)	1		11	0.9238	1	9.6162	Viruses;Duplodnaviria;Heunggongvirae;Uroviricota;Caudoviricetes	dsDNA	Prokaryote	Duplodnaviria	Heunggongvirae	Uroviricota	Caudoviricetes
SM1000_MG_virome_scaffold_1204_c4	SM1000_MG_virome_scaffold_1204_c4	MG_virome	yes	19067	No	24	4	0	Low-quality	Genome-fragment	27.7	HMM-based (lower-bound)	1		11	0.9742	3	10.0063	Viruses;Duplodnaviria;Heunggongvirae;Uroviricota;Caudoviricetes	dsDNA	Prokaryote	Duplodnaviria	Heunggongvirae	Uroviricota	Caudoviricetes
SM1000_MG_virome_scaffold_1205_c1	SM1000_MG_virome_scaffold_1205_c1	MG_virome	yes	37774	No	54	9	0	Low-quality	Genome-fragment	39.32	HMM-based (lower-bound)	1		11	0.9794	6	22.5717	Viruses;Duplodnaviria;Heunggongvirae;Uroviricota;Caudoviricetes	dsDNA	Prokaryote	Duplodnaviria	Heunggongvirae	Uroviricota	Caudoviricetes
SM1000_MG_virome_scaffold_1206_c1	SM1000_MG_virome_scaffold_1206_c1	MG_virome	yes	37723	No	61	6	2	Medium-quality	Genome-fragment	68.82	AAI-based (medium-confidence)	1		11	0.975	3	20.7819	Viruses;Duplodnaviria;Heunggongvirae;Uroviricota;Caudoviricetes	dsDNA	Prokaryote	Duplodnaviria	Heunggongvirae	Uroviricota	Caudoviricetes
SM1000_MG_virome_scaffold_1207_c1	SM1000_MG_virome_scaffold_1207_c1	MG_virome	yes	37689	No	50	6	1	High-quality	High-quality	93.07	AAI-based (high-confidence)	1		11	0.9729	5	29.0664	Viruses;Duplodnaviria;Heunggongvirae;Uroviricota;Caudoviricetes	dsDNA	Prokaryote	Duplodnaviria	Heunggongvirae	Uroviricota	Caudoviricetes
SM1000_MG_virome_scaffold_1208_c1	SM1000_MG_virome_scaffold_1208_c1,SM1005_MG_virome_scaffold_1530_c1	MG_virome	yes	26493	No	29	9	0	Medium-quality	Genome-fragment	67.35	AAI-based (medium-confidence)	1		11	0.9797	2	28.3624	Viruses;Duplodnaviria;Heunggongvirae;Uroviricota;Caudoviricetes	dsDNA	Prokaryote	Duplodnaviria	Heunggongvirae	Uroviricota	Caudoviricetes
SM1000_MG_virome_scaffold_1209_c1	SM1000_MG_virome_scaffold_1209_c1,SM1029_MG_virome_scaffold_850_c1	MG_virome	yes	21353	No	29	9	1	Medium-quality	Genome-fragment	54.17	AAI-based (medium-confidence)	1		11	0.9783	1	21.3545	Viruses;Duplodnaviria;Heunggongvirae;Uroviricota;Caudoviricetes	dsDNA	Prokaryote	Duplodnaviria	Heunggongvirae	Uroviricota	Caudoviricetes
SM1000_MG_virome_scaffold_1209_c2	SM1000_MG_virome_scaffold_1209_c2,SM1029_MG_virome_scaffold_852_c1	MG_virome	yes	16292	No	29	6	0	Low-quality	Genome-fragment	24.8	HMM-based (lower-bound)	1		11	0.9789	5	16.7789	Viruses;Duplodnaviria;Heunggongvirae;Uroviricota;Caudoviricetes	dsDNA	Prokaryote	Duplodnaviria	Heunggongvirae	Uroviricota	Caudoviricetes
SM1000_MG_virome_scaffold_121_c1	SM1000_MG_virome_scaffold_121_c1	MG_virome	yes	93951	No	117	23	1	High-quality	High-quality	100	AAI-based (medium-confidence)	1		11	0.9796	10	79.4301	Viruses;Duplodnaviria;Heunggongvirae;Uroviricota;Caudoviricetes	dsDNA	Prokaryote	Duplodnaviria	Heunggongvirae	Uroviricota	Caudoviricetes
SM1000_MG_virome_scaffold_1210_c1	SM1000_MG_virome_scaffold_1210_c1	MG_virome	yes	31769	No	41	13	0	Low-quality	Genome-fragment	39.74	HMM-based (lower-bound)	1		11	0.9657	7	21.84	Viruses;Duplodnaviria;Heunggongvirae;Uroviricota;Caudoviricetes	dsDNA	Prokaryote	Duplodnaviria	Heunggongvirae	Uroviricota	Caudoviricetes
SM1000_MG_virome_scaffold_1211_c1	SM1000_MG_virome_scaffold_1211_c1,SM1031_MG_virome_scaffold_1043_c1	MG_virome	yes	37622	No	70	17	0	High-quality	High-quality	90.75	AAI-based (medium-confidence)	1		11	0.9747	8	40.3134	Viruses;Duplodnaviria;Heunggongvirae;Uroviricota;Caudoviricetes	dsDNA	Prokaryote	Duplodnaviria	Heunggongvirae	Uroviricota	Caudoviricetes
SM1000_MG_virome_scaffold_1212_c1	SM1000_MG_virome_scaffold_1212_c1	MG_virome	yes	37615	No	52	8	2	High-quality	High-quality	98.28	AAI-based (medium-confidence)	1		11	0.907	5	24.0957	Viruses;Duplodnaviria;Heunggongvirae;Uroviricota;Caudoviricetes	dsDNA	Prokaryote	Duplodnaviria	Heunggongvirae	Uroviricota	Caudoviricetes
SM1000_MG_virome_scaffold_1213_c2	SM1000_MG_virome_scaffold_1213_c2	MG_virome	yes	29930	No	51	14	0	Medium-quality	Genome-fragment	71.94	AAI-based (medium-confidence)	1		11	0.9694	9	40.7366	Viruses;Duplodnaviria;Heunggongvirae;Uroviricota;Caudoviricetes	dsDNA	Prokaryote	Duplodnaviria	Heunggongvirae	Uroviricota	Caudoviricetes
SM1000_MG_virome_scaffold_1214_c1	SM1000_MG_virome_scaffold_1214_c1	MG_virome	yes	11881	No	7	1	0	Low-quality	Genome-fragment	3.6	AAI-based (high-confidence)	1		11	0.979	1	11.6273	Viruses;Duplodnaviria;Heunggongvirae;Uroviricota;Caudoviricetes	dsDNA	Prokaryote	Duplodnaviria	Heunggongvirae	Uroviricota	Caudoviricetes
SM1000_MG_virome_scaffold_1216_c1	SM1000_MG_virome_scaffold_1216_c1	MG_virome	yes	37579	No	49	7	1	High-quality	High-quality	100	AAI-based (medium-confidence)	1		11	0.9693	7	27.6633	Viruses;Duplodnaviria;Heunggongvirae;Uroviricota;Caudoviricetes	dsDNA	Prokaryote	Duplodnaviria	Heunggongvirae	Uroviricota	Caudoviricetes
SM1000_MG_virome_scaffold_1217_c1	SM1000_MG_virome_scaffold_1217_c1	MG_virome	yes	17560	No	26	16	0	Low-quality	Genome-fragment	43.4	AAI-based (medium-confidence)	1		11	0.9833	8	37.5577	Viruses;Duplodnaviria;Heunggongvirae;Uroviricota;Caudoviricetes	dsDNA	Prokaryote	Duplodnaviria	Heunggongvirae	Uroviricota	Caudoviricetes
SM1000_MG_virome_scaffold_1218_c1	SM1000_MG_virome_scaffold_1218_c1	MG_virome	yes	21453	No	47	4	0	Low-quality	Genome-fragment	45.82	AAI-based (medium-confidence)	1		11	0.9516	3	8.6022	Viruses;Duplodnaviria;Heunggongvirae;Uroviricota;Caudoviricetes	dsDNA	Prokaryote	Duplodnaviria	Heunggongvirae	Uroviricota	Caudoviricetes
SM1000_MG_virome_scaffold_1218_c3	SM1000_MG_virome_scaffold_1218_c3	MG_virome	yes	14735	No	14	2	0	Low-quality	Genome-fragment	31.35	AAI-based (medium-confidence)	1		11	0.9368	1	4.7365	Viruses;Duplodnaviria;Heunggongvirae;Uroviricota;Caudoviricetes	dsDNA	Prokaryote	Duplodnaviria	Heunggongvirae	Uroviricota	Caudoviricetes
SM1000_MG_virome_scaffold_1219_c2	SM1000_MG_virome_scaffold_1219_c2	MG_virome	yes	11582	No	11	2	0	Low-quality	Genome-fragment	24.09	AAI-based (medium-confidence)	1		11	0.9776	2	9.3886	Viruses;Duplodnaviria;Heunggongvirae;Uroviricota;Caudoviricetes	dsDNA	Prokaryote	Duplodnaviria	Heunggongvirae	Uroviricota	Caudoviricetes
SM1000_MG_virome_scaffold_1219_c6	SM1000_MG_virome_scaffold_1219_c6	MG_virome	yes	10681	No	20	4	0	Low-quality	Genome-fragment	10.2	HMM-based (lower-bound)	1		11	0.9533	2	11.7143	Viruses;Duplodnaviria;Heunggongvirae;Uroviricota;Caudoviricetes	dsDNA	Prokaryote	Duplodnaviria	Heunggongvirae	Uroviricota	Caudoviricetes
SM1000_MG_virome_scaffold_122_c1	SM1000_MG_virome_scaffold_122_c1	MG_virome	yes	93562	No	135	17	3	Medium-quality	Genome-fragment	58.81	AAI-based (medium-confidence)	1		11	0.9646	4	44.7941	Viruses;Duplodnaviria;Heunggongvirae;Uroviricota;Caudoviricetes	dsDNA	Prokaryote	Duplodnaviria	Heunggongvirae	Uroviricota	Caudoviricetes
SM1000_MG_virome_scaffold_1220_c1	SM1000_MG_virome_scaffold_1220_c1	MG_virome	yes	26838	No	58	7	1	Low-quality	Genome-fragment	36.1	HMM-based (lower-bound)	1		11	0.8439	0	16.826	Viruses;Duplodnaviria;Heunggongvirae;Uroviricota;Caudoviricetes	dsDNA	Prokaryote	Duplodnaviria	Heunggongvirae	Uroviricota	Caudoviricetes
SM1000_MG_virome_scaffold_1220_c2	SM1000_MG_virome_scaffold_1220_c2	MG_virome	yes	10660	No	14	2	0	Low-quality	Genome-fragment	24.4	AAI-based (medium-confidence)	1		11	0.9517	0	2.8943	Viruses;Duplodnaviria;Heunggongvirae;Uroviricota;Caudoviricetes	dsDNA	Prokaryote	Duplodnaviria	Heunggongvirae	Uroviricota	Caudoviricetes
SM1000_MG_virome_scaffold_1221_c1	SM1000_MG_virome_scaffold_1221_c1,SM1003_MG_virome_scaffold_169_c2,SM1003_MG_virome_scaffold_169_c1	MG_virome	yes	37476	No	63	9	0	High-quality	High-quality	100	AAI-based (high-confidence)	1		11	0.9609	4	35.4224	Viruses;Duplodnaviria;Heunggongvirae;Uroviricota;Caudoviricetes	dsDNA	Prokaryote	Duplodnaviria	Heunggongvirae	Uroviricota	Caudoviricetes
SM1000_MG_virome_scaffold_1222_c1	SM1000_MG_virome_scaffold_1222_c1	MG_virome	yes	37472	No	50	8	0	Medium-quality	Genome-fragment	83.16	AAI-based (medium-confidence)	1		11	0.975	3	18.7268	Viruses;Duplodnaviria;Heunggongvirae;Uroviricota;Caudoviricetes	dsDNA	Prokaryote	Duplodnaviria	Heunggongvirae	Uroviricota	Caudoviricetes
SM1000_MG_virome_scaffold_1223_c2	SM1000_MG_virome_scaffold_1223_c2	MG_virome	yes	13709	No	19	3	0	Low-quality	Genome-fragment	19.45	HMM-based (lower-bound)	1		11	0.978	4	8.7539	Viruses;Duplodnaviria;Heunggongvirae;Uroviricota;Caudoviricetes	dsDNA	Prokaryote	Duplodnaviria	Heunggongvirae	Uroviricota	Caudoviricetes
SM1000_MG_virome_scaffold_1224_c1	SM1000_MG_virome_scaffold_1224_c1	MG_virome	yes	37441	No	67	16	0	Medium-quality	Genome-fragment	58.21	HMM-based (lower-bound)	1		11	0.9814	5	45.198	Viruses;Duplodnaviria;Heunggongvirae;Uroviricota;Caudoviricetes	dsDNA	Prokaryote	Duplodnaviria	Heunggongvirae	Uroviricota	Caudoviricetes
SM1000_MG_virome_scaffold_1225_c1	SM1000_MG_virome_scaffold_1225_c1	MG_virome	yes	37439	No	68	8	2	Low-quality	Genome-fragment	39.56	HMM-based (lower-bound)	1		11	0.9609	3	38.6645	Viruses;Duplodnaviria;Heunggongvirae;Uroviricota;Caudoviricetes	dsDNA	Prokaryote	Duplodnaviria	Heunggongvirae	Uroviricota	Caudoviricetes
SM1000_MG_virome_scaffold_1226_c1	SM1000_MG_virome_scaffold_1226_c1	MG_virome	yes	37433	No	64	11	0	Complete	High-quality	100	DTR (high-confidence)	1		11	0.9785	3	40.8598	Viruses;Duplodnaviria;Heunggongvirae;Uroviricota;Caudoviricetes	dsDNA	Prokaryote	Duplodnaviria	Heunggongvirae	Uroviricota	Caudoviricetes
SM1000_MG_virome_scaffold_1228_c1	SM1000_MG_virome_scaffold_1228_c1	MG_virome	yes	10777	No	19	1	0	Low-quality	Genome-fragment	27.19	AAI-based (high-confidence)	1		11	0.9764	3	9.2087	Viruses;Duplodnaviria;Heunggongvirae;Uroviricota;Caudoviricetes	dsDNA	Prokaryote	Duplodnaviria	Heunggongvirae	Uroviricota	Caudoviricetes
SM1000_MG_virome_scaffold_1228_c2	SM1000_MG_virome_scaffold_1228_c2	MG_virome	yes	26610	No	41	6	0	Low-quality	Genome-fragment	21.24	HMM-based (lower-bound)	1		11	0.9756	1	16.1683	Viruses;Duplodnaviria;Heunggongvirae;Uroviricota;Caudoviricetes	dsDNA	Prokaryote	Duplodnaviria	Heunggongvirae	Uroviricota	Caudoviricetes
SM1000_MG_virome_scaffold_1229_c3	SM1000_MG_virome_scaffold_1229_c3	MG_virome	yes	15030	No	32	6	1	Low-quality	Genome-fragment	6.86	HMM-based (lower-bound)	1		11	0.9063	0	13.5576	Viruses;Duplodnaviria;Heunggongvirae;Uroviricota;Caudoviricetes	dsDNA	Prokaryote	Duplodnaviria	Heunggongvirae	Uroviricota	Caudoviricetes
SM1000_MG_virome_scaffold_123_c1	SM1000_MG_virome_scaffold_123_c1	MG_virome	yes	92199	No	68	12	1	Low-quality	Genome-fragment	43.64	AAI-based (medium-confidence)	1		11	0.9287	5	66.8145	Viruses;Duplodnaviria;Heunggongvirae;Uroviricota;Caudoviricetes	dsDNA	Prokaryote	Duplodnaviria	Heunggongvirae	Uroviricota	Caudoviricetes
SM1000_MG_virome_scaffold_1230_c1	SM1000_MG_virome_scaffold_1230_c1	MG_virome	yes	37337	No	55	8	1	High-quality	High-quality	100	AAI-based (medium-confidence)	1		11	0.9784	9	35.1328	Viruses;Duplodnaviria;Heunggongvirae;Uroviricota;Caudoviricetes	dsDNA	Prokaryote	Duplodnaviria	Heunggongvirae	Uroviricota	Caudoviricetes
SM1000_MG_virome_scaffold_1231_c1	SM1000_MG_virome_scaffold_1231_c1	MG_virome	yes	37329	No	66	8	3	Medium-quality	Genome-fragment	56.32	AAI-based (high-confidence)	1		11	0.9741	7	37.292	Viruses;Duplodnaviria;Heunggongvirae;Uroviricota;Caudoviricetes	dsDNA	Prokaryote	Duplodnaviria	Heunggongvirae	Uroviricota	Caudoviricetes
SM1000_MG_virome_scaffold_1232_c1	SM1000_MG_virome_scaffold_1232_c1	MG_virome	yes	22163	No	28	14	0	Low-quality	Genome-fragment	37.33	AAI-based (medium-confidence)	1		11	0.9801	6	25.169	Viruses;Duplodnaviria;Heunggongvirae;Uroviricota;Caudoviricetes	dsDNA	Prokaryote	Duplodnaviria	Heunggongvirae	Uroviricota	Caudoviricetes
SM1000_MG_virome_scaffold_1233_c2	SM1000_MG_virome_scaffold_1233_c2	MG_virome	yes	32118	No	49	2	1	Low-quality	Genome-fragment	32.46	AAI-based (medium-confidence)	1		11	0.9632	0	9.0596	Viruses;Duplodnaviria;Heunggongvirae;Uroviricota;Caudoviricetes	dsDNA	Prokaryote	Duplodnaviria	Heunggongvirae	Uroviricota	Caudoviricetes
SM1000_MG_virome_scaffold_1234_c1	SM1000_MG_virome_scaffold_1234_c1	MG_virome	yes	37262	No	51	11	0	Medium-quality	Genome-fragment	71.61	HMM-based (lower-bound)	1		11	0.9761	5	31.8787	Viruses;Duplodnaviria;Heunggongvirae;Uroviricota;Caudoviricetes	dsDNA	Prokaryote	Duplodnaviria	Heunggongvirae	Uroviricota	Caudoviricetes
SM1000_MG_virome_scaffold_1235_c1	SM1000_MG_virome_scaffold_1235_c1	MG_virome	yes	11363	No	23	7	0	Low-quality	Genome-fragment	10.44	HMM-based (lower-bound)	1		11	0.9614	0	11.9338	Viruses;Duplodnaviria;Heunggongvirae;Uroviricota;Caudoviricetes	dsDNA	Prokaryote	Duplodnaviria	Heunggongvirae	Uroviricota	Caudoviricetes
SM1000_MG_virome_scaffold_1235_c2	SM1000_MG_virome_scaffold_1235_c2	MG_virome	yes	15084	No	19	7	0	Low-quality	Genome-fragment	26.72	AAI-based (medium-confidence)	1		11	0.9719	2	14.3679	Viruses;Duplodnaviria;Heunggongvirae;Uroviricota;Caudoviricetes	dsDNA	Prokaryote	Duplodnaviria	Heunggongvirae	Uroviricota	Caudoviricetes
SM1000_MG_virome_scaffold_1236_c1	SM1000_MG_virome_scaffold_1236_c1	MG_virome	yes	25713	No	37	1	0	Low-quality	Genome-fragment	37.42	AAI-based (medium-confidence)	1		11	0.9518	2	18.0274	Viruses;Duplodnaviria;Heunggongvirae;Uroviricota;Caudoviricetes	dsDNA	Prokaryote	Duplodnaviria	Heunggongvirae	Uroviricota	Caudoviricetes
SM1000_MG_virome_scaffold_1236_c2	SM1000_MG_virome_scaffold_1236_c2	MG_virome	yes	11495	No	22	1	0	Low-quality	Genome-fragment	16.63	HMM-based (lower-bound)	1		11	0.887	0	4.6254	Viruses;Duplodnaviria;Heunggongvirae;Uroviricota;Caudoviricetes	dsDNA	Prokaryote	Duplodnaviria	Heunggongvirae	Uroviricota	Caudoviricetes
SM1000_MG_virome_scaffold_1237_c1	SM1000_MG_virome_scaffold_1237_c1	MG_virome	yes	37204	No	30	11	0	Low-quality	Genome-fragment	10.37	AAI-based (high-confidence)	1.04		11	0.9764	6	20.1144	Viruses;Duplodnaviria;Heunggongvirae;Uroviricota;Caudoviricetes	dsDNA	Prokaryote	Duplodnaviria	Heunggongvirae	Uroviricota	Caudoviricetes
SM1000_MG_virome_scaffold_124_c1	SM1000_MG_virome_scaffold_124_c1	MG_virome	yes	92030	No	127	24	8	Low-quality	Genome-fragment	23.89	AAI-based (high-confidence)	1		11	0.9761	5	109.641	Viruses;Duplodnaviria;Heunggongvirae;Uroviricota;Caudoviricetes	dsDNA	Prokaryote	Duplodnaviria	Heunggongvirae	Uroviricota	Caudoviricetes
SM1000_MG_virome_scaffold_1240_c1	SM1000_MG_virome_scaffold_1240_c1	MG_virome	yes	37169	No	60	10	2	Complete	High-quality	100	DTR (medium-confidence)	1		11	0.9778	4	40.247	Viruses;Duplodnaviria;Heunggongvirae;Uroviricota;Caudoviricetes	dsDNA	Prokaryote	Duplodnaviria	Heunggongvirae	Uroviricota	Caudoviricetes
SM1000_MG_virome_scaffold_1241_c1	SM1000_MG_virome_scaffold_1241_c1	MG_virome	yes	26287	No	39	4	0	Low-quality	Genome-fragment	28.29	HMM-based (lower-bound)	1		11	0.9639	2	10.2252	Viruses;Duplodnaviria;Heunggongvirae;Uroviricota;Caudoviricetes	dsDNA	Prokaryote	Duplodnaviria	Heunggongvirae	Uroviricota	Caudoviricetes
SM1000_MG_virome_scaffold_1242_c1	SM1000_MG_virome_scaffold_1242_c1	MG_virome	yes	25301	No	25	3	0	Low-quality	Genome-fragment	46.78	AAI-based (medium-confidence)	1		11	0.9733	1	13.0315	Viruses;Duplodnaviria;Heunggongvirae;Uroviricota;Caudoviricetes	dsDNA	Prokaryote	Duplodnaviria	Heunggongvirae	Uroviricota	Caudoviricetes
SM1000_MG_virome_scaffold_1243_c1	SM1000_MG_virome_scaffold_1243_c1	MG_virome	yes	37152	No	73	8	2	Medium-quality	Genome-fragment	50	HMM-based (lower-bound)	1		11	0.9723	5	36.3221	Viruses;Duplodnaviria;Heunggongvirae;Uroviricota;Caudoviricetes	dsDNA	Prokaryote	Duplodnaviria	Heunggongvirae	Uroviricota	Caudoviricetes
SM1000_MG_virome_scaffold_1245_c1	SM1000_MG_virome_scaffold_1245_c1	MG_virome	yes	37137	No	66	11	0	High-quality	High-quality	100	AAI-based (medium-confidence)	1		11	0.9775	4	39.847	Viruses;Duplodnaviria;Heunggongvirae;Uroviricota;Caudoviricetes	dsDNA	Prokaryote	Duplodnaviria	Heunggongvirae	Uroviricota	Caudoviricetes
SM1000_MG_virome_scaffold_1246_c1	SM1000_MG_virome_scaffold_1246_c1	MG_virome	yes	37072	No	61	10	1	High-quality	High-quality	97.36	AAI-based (medium-confidence)	1		11	0.9672	4	21.3792	Viruses;Duplodnaviria;Heunggongvirae;Uroviricota;Caudoviricetes	dsDNA	Prokaryote	Duplodnaviria	Heunggongvirae	Uroviricota	Caudoviricetes
SM1000_MG_virome_scaffold_1247_c1	SM1000_MG_virome_scaffold_1247_c1	MG_virome	yes	37049	No	63	18	0	Complete	High-quality	100	DTR (high-confidence)	1		11	0.9798	7	48.8771	Viruses;Duplodnaviria;Heunggongvirae;Uroviricota;Caudoviricetes	dsDNA	Prokaryote	Duplodnaviria	Heunggongvirae	Uroviricota	Caudoviricetes
SM1000_MG_virome_scaffold_1248_c5	SM1000_MG_virome_scaffold_1248_c5	MG_virome	yes	17901	No	41	5	0	Low-quality	Genome-fragment	11.13	AAI-based (medium-confidence)	1		11	0.98	0	15.0497	Viruses;Duplodnaviria;Heunggongvirae;Uroviricota;Caudoviricetes	dsDNA	Prokaryote	Duplodnaviria	Heunggongvirae	Uroviricota	Caudoviricetes
SM1000_MG_virome_scaffold_1249_c1	SM1000_MG_virome_scaffold_1249_c1	MG_virome	yes	37026	No	58	14	1	High-quality	High-quality	94.15	AAI-based (medium-confidence)	1		11	0.9783	7	48.8237	Viruses;Duplodnaviria;Heunggongvirae;Uroviricota;Caudoviricetes	dsDNA	Prokaryote	Duplodnaviria	Heunggongvirae	Uroviricota	Caudoviricetes
SM1000_MG_virome_scaffold_125_c1	SM1000_MG_virome_scaffold_125_c1	MG_virome	yes	91186	No	117	9	3	Medium-quality	Genome-fragment	55.75	AAI-based (medium-confidence)	1		11	0.9695	3	31.6247	Viruses;Duplodnaviria;Heunggongvirae;Uroviricota;Caudoviricetes	dsDNA	Prokaryote	Duplodnaviria	Heunggongvirae	Uroviricota	Caudoviricetes
SM1000_MG_virome_scaffold_1250_c4	SM1000_MG_virome_scaffold_1250_c4	MG_virome	yes	23262	No	66	3	0	Low-quality	Genome-fragment	9.96	HMM-based (lower-bound)	1		11	0.9731	0	8.9045	Viruses;Duplodnaviria;Heunggongvirae;Uroviricota;Caudoviricetes	dsDNA	Prokaryote	Duplodnaviria	Heunggongvirae	Uroviricota	Caudoviricetes
SM1000_MG_virome_scaffold_1251_c1	SM1000_MG_virome_scaffold_1251_c1	MG_virome	yes	37019	No	54	10	1	High-quality	High-quality	90.79	AAI-based (medium-confidence)	1		11	0.9744	4	35.1023	Viruses;Duplodnaviria;Heunggongvirae;Uroviricota;Caudoviricetes	dsDNA	Prokaryote	Duplodnaviria	Heunggongvirae	Uroviricota	Caudoviricetes
SM1000_MG_virome_scaffold_1252_c2	SM1000_MG_virome_scaffold_1252_c2	MG_virome	yes	14504	No	21	4	0	Low-quality	Genome-fragment	35.43	AAI-based (high-confidence)	1		11	0.9754	1	12.2335	Viruses;Duplodnaviria;Heunggongvirae;Uroviricota;Caudoviricetes	dsDNA	Prokaryote	Duplodnaviria	Heunggongvirae	Uroviricota	Caudoviricetes
SM1000_MG_virome_scaffold_1252_c3	SM1000_MG_virome_scaffold_1252_c3	MG_virome	yes	13060	No	22	3	0	Low-quality	Genome-fragment	34.29	AAI-based (medium-confidence)	1		11	0.9786	5	19.8023	Viruses;Duplodnaviria;Heunggongvirae;Uroviricota;Caudoviricetes	dsDNA	Prokaryote	Duplodnaviria	Heunggongvirae	Uroviricota	Caudoviricetes
SM1000_MG_virome_scaffold_1253_c3	SM1000_MG_virome_scaffold_1253_c3	MG_virome	yes	14632	No	36	1	1	Low-quality	Genome-fragment	7.19	HMM-based (lower-bound)	1		11	0.9019	0	10.5606	Viruses;Duplodnaviria;Heunggongvirae;Uroviricota;Caudoviricetes	dsDNA	Prokaryote	Duplodnaviria	Heunggongvirae	Uroviricota	Caudoviricetes
SM1000_MG_virome_scaffold_1256_c1	SM1000_MG_virome_scaffold_1256_c1,SM1029_MG_virome_scaffold_189_c1	MG_virome	yes	36926	No	58	5	1	High-quality	High-quality	96.76	AAI-based (medium-confidence)	1		11	0.9428	3	26.5964	Viruses;Duplodnaviria;Heunggongvirae;Uroviricota;Caudoviricetes	dsDNA	Prokaryote	Duplodnaviria	Heunggongvirae	Uroviricota	Caudoviricetes
SM1000_MG_virome_scaffold_1257_c6	SM1000_MG_virome_scaffold_1257_c6	MG_virome	yes	10182	No	19	2	1	Low-quality	Genome-fragment	9.98	AAI-based (medium-confidence)	1		11	0.9339	0	6.6656	Viruses;Duplodnaviria;Heunggongvirae;Uroviricota;Caudoviricetes	dsDNA	Prokaryote	Duplodnaviria	Heunggongvirae	Uroviricota	Caudoviricetes
SM1000_MG_virome_scaffold_1258_c1	SM1000_MG_virome_scaffold_1258_c1	MG_virome	yes	25793	No	45	8	0	Low-quality	Genome-fragment	30.61	AAI-based (medium-confidence)	1		11	0.9736	5	24.0892	Viruses;Duplodnaviria;Heunggongvirae;Uroviricota;Caudoviricetes	dsDNA	Prokaryote	Duplodnaviria	Heunggongvirae	Uroviricota	Caudoviricetes
SM1000_MG_virome_scaffold_1258_c2	SM1000_MG_virome_scaffold_1258_c2	MG_virome	yes	11115	No	17	4	0	Low-quality	Genome-fragment	9.61	HMM-based (lower-bound)	1		11	0.9704	2	13.1409	Viruses;Duplodnaviria;Heunggongvirae;Uroviricota;Caudoviricetes	dsDNA	Prokaryote	Duplodnaviria	Heunggongvirae	Uroviricota	Caudoviricetes
SM1000_MG_virome_scaffold_1259_c1	SM1000_MG_virome_scaffold_1259_c1	MG_virome	yes	36914	No	47	9	0	Medium-quality	Genome-fragment	55.94	AAI-based (high-confidence)	1		11	0.9781	3	25.4452	Viruses;Duplodnaviria;Heunggongvirae;Uroviricota;Caudoviricetes	dsDNA	Prokaryote	Duplodnaviria	Heunggongvirae	Uroviricota	Caudoviricetes
SM1000_MG_virome_scaffold_126_c1	SM1000_MG_virome_scaffold_126_c1	MG_virome	yes	29887	No	20	2	0	Low-quality	Genome-fragment	31.89	AAI-based (medium-confidence)	1		11	0.9814	1	16.5484	Viruses;Duplodnaviria;Heunggongvirae;Uroviricota;Caudoviricetes	dsDNA	Prokaryote	Duplodnaviria	Heunggongvirae	Uroviricota	Caudoviricetes
SM1000_MG_virome_scaffold_126_c8	SM1000_MG_virome_scaffold_126_c8	MG_virome	yes	20955	No	32	6	0	Low-quality	Genome-fragment	17.56	AAI-based (medium-confidence)	1		11	0.9811	3	24.7365	Viruses;Duplodnaviria;Heunggongvirae;Uroviricota;Caudoviricetes	dsDNA	Prokaryote	Duplodnaviria	Heunggongvirae	Uroviricota	Caudoviricetes
SM1000_MG_virome_scaffold_1260_c2	SM1000_MG_virome_scaffold_1260_c2,SM1030_MG_virome_scaffold_332_c2	MG_virome	yes	28379	No	43	11	0	Medium-quality	Genome-fragment	73.22	AAI-based (high-confidence)	1		11	0.9719	5	32.7905	Viruses;Duplodnaviria;Heunggongvirae;Uroviricota;Caudoviricetes	dsDNA	Prokaryote	Duplodnaviria	Heunggongvirae	Uroviricota	Caudoviricetes
SM1000_MG_virome_scaffold_1261_c1	SM1000_MG_virome_scaffold_1261_c1	MG_virome	yes	36891	No	67	10	1	Complete	High-quality	100	DTR (high-confidence)	1		11	0.9802	3	52.0951	Viruses;Duplodnaviria;Heunggongvirae;Uroviricota;Caudoviricetes	dsDNA	Prokaryote	Duplodnaviria	Heunggongvirae	Uroviricota	Caudoviricetes
SM1000_MG_virome_scaffold_1262_c1	SM1000_MG_virome_scaffold_1262_c1	MG_virome	yes	36885	No	56	14	1	High-quality	High-quality	100	AAI-based (medium-confidence)	1		11	0.9759	10	42.4366	Viruses;Duplodnaviria;Heunggongvirae;Uroviricota;Caudoviricetes	dsDNA	Prokaryote	Duplodnaviria	Heunggongvirae	Uroviricota	Caudoviricetes
SM1000_MG_virome_scaffold_1263_c1	SM1000_MG_virome_scaffold_1263_c1	MG_virome	yes	36862	No	75	3	2	Low-quality	Genome-fragment	21.55	HMM-based (lower-bound)	1		11	0.9257	1	8.4068	Viruses;Duplodnaviria;Heunggongvirae;Uroviricota;Caudoviricetes	dsDNA	Prokaryote	Duplodnaviria	Heunggongvirae	Uroviricota	Caudoviricetes
SM1000_MG_virome_scaffold_1265_c1	SM1000_MG_virome_scaffold_1265_c1	MG_virome	yes	18394	No	33	1	1	Low-quality	Genome-fragment	10.26	HMM-based (lower-bound)	1		11	0.9545	1	6.7452	Viruses;Duplodnaviria;Heunggongvirae;Uroviricota;Caudoviricetes	dsDNA	Prokaryote	Duplodnaviria	Heunggongvirae	Uroviricota	Caudoviricetes
SM1000_MG_virome_scaffold_1265_c2	SM1000_MG_virome_scaffold_1265_c2	MG_virome	yes	18415	No	33	2	2	Low-quality	Genome-fragment	22.31	HMM-based (lower-bound)	1		11	0.9073	2	5.0599	Viruses;Duplodnaviria;Heunggongvirae;Uroviricota;Caudoviricetes	dsDNA	Prokaryote	Duplodnaviria	Heunggongvirae	Uroviricota	Caudoviricetes
SM1000_MG_virome_scaffold_1266_c3	SM1000_MG_virome_scaffold_1266_c3	MG_virome	yes	10689	No	15	7	0	Low-quality	Genome-fragment	6.13	AAI-based (medium-confidence)	1		11	0.9788	1	11.9235	Viruses;Duplodnaviria;Heunggongvirae;Uroviricota;Caudoviricetes	dsDNA	Prokaryote	Duplodnaviria	Heunggongvirae	Uroviricota	Caudoviricetes
SM1000_MG_virome_scaffold_1267_c1	SM1000_MG_virome_scaffold_1267_c1	MG_virome	yes	22174	No	27	5	0	Medium-quality	Genome-fragment	62.87	AAI-based (medium-confidence)	1		11	0.9778	4	33.2699	Viruses;Duplodnaviria;Heunggongvirae;Uroviricota;Caudoviricetes	dsDNA	Prokaryote	Duplodnaviria	Heunggongvirae	Uroviricota	Caudoviricetes
SM1000_MG_virome_scaffold_1268_c1	SM1000_MG_virome_scaffold_1268_c1	MG_virome	yes	34377	No	54	6	2	Low-quality	Genome-fragment	40.73	HMM-based (lower-bound)	1		11	0.9704	3	15.7883	Viruses;Duplodnaviria;Heunggongvirae;Uroviricota;Caudoviricetes	dsDNA	Prokaryote	Duplodnaviria	Heunggongvirae	Uroviricota	Caudoviricetes
SM1000_MG_virome_scaffold_1269_c2	SM1000_MG_virome_scaffold_1269_c2	MG_virome	yes	24935	No	34	4	0	Medium-quality	Genome-fragment	59.69	AAI-based (medium-confidence)	1		11	0.9795	0	19.9964	Viruses;Duplodnaviria;Heunggongvirae;Uroviricota;Caudoviricetes	dsDNA	Prokaryote	Duplodnaviria	Heunggongvirae	Uroviricota	Caudoviricetes
SM1000_MG_virome_scaffold_127_c1	SM1000_MG_virome_scaffold_127_c1	MG_virome	yes	91221	No	157	27	2	Medium-quality	Genome-fragment	86.33	HMM-based (lower-bound)	1		11	0.9407	6	72.737	Viruses;Duplodnaviria;Heunggongvirae;Uroviricota;Caudoviricetes	dsDNA	Prokaryote	Duplodnaviria	Heunggongvirae	Uroviricota	Caudoviricetes
SM1000_MG_virome_scaffold_1270_c1	SM1000_MG_virome_scaffold_1270_c1	MG_virome	yes	36690	No	55	6	1	Medium-quality	Genome-fragment	69.22	AAI-based (medium-confidence)	1		11	0.978	5	34.0796	Viruses;Duplodnaviria;Heunggongvirae;Uroviricota;Caudoviricetes	dsDNA	Prokaryote	Duplodnaviria	Heunggongvirae	Uroviricota	Caudoviricetes
SM1000_MG_virome_scaffold_1271_c1	SM1000_MG_virome_scaffold_1271_c1	MG_virome	yes	30679	No	69	12	0	Low-quality	Genome-fragment	48.82	AAI-based (medium-confidence)	1		11	0.9786	3	26.3813	Viruses;Duplodnaviria;Heunggongvirae;Uroviricota;Caudoviricetes	dsDNA	Prokaryote	Duplodnaviria	Heunggongvirae	Uroviricota	Caudoviricetes
SM1000_MG_virome_scaffold_1272_c1	SM1000_MG_virome_scaffold_1272_c1	MG_virome	yes	36676	No	74	11	0	Low-quality	Genome-fragment	25.41	HMM-based (lower-bound)	1		11	0.9788	3	31.5258	Viruses;Duplodnaviria;Heunggongvirae;Uroviricota;Caudoviricetes	dsDNA	Prokaryote	Duplodnaviria	Heunggongvirae	Uroviricota	Caudoviricetes
SM1000_MG_virome_scaffold_1274_c1	SM1000_MG_virome_scaffold_1274_c1,SM1050_MG_virome_scaffold_828_c3	MG_virome	yes	36619	No	62	13	1	Medium-quality	Genome-fragment	55.81	HMM-based (lower-bound)	1		11	0.9643	5	36.3962	Viruses;Duplodnaviria;Heunggongvirae;Uroviricota;Caudoviricetes	dsDNA	Prokaryote	Duplodnaviria	Heunggongvirae	Uroviricota	Caudoviricetes
SM1000_MG_virome_scaffold_1275_c1	SM1000_MG_virome_scaffold_1275_c1	MG_virome	yes	36595	No	56	21	0	Complete	High-quality	100	DTR (high-confidence)	1		11	0.9758	14	51.1054	Viruses;Duplodnaviria;Heunggongvirae;Uroviricota;Caudoviricetes	dsDNA	Prokaryote	Duplodnaviria	Heunggongvirae	Uroviricota	Caudoviricetes
SM1000_MG_virome_scaffold_1276_c1	SM1000_MG_virome_scaffold_1276_c1	MG_virome	yes	36567	No	29	1	0	Low-quality	Genome-fragment	2.95	HMM-based (lower-bound)	1		11	0.8141	1	3.4176	Viruses;Varidnaviria;Bamfordvirae;Preplasmiviricota;Polintoviricetes;Orthopolintovirales;Adintoviridae	dsDNA	Eukaryote	Varidnaviria	Bamfordvirae	Preplasmiviricota	Polintoviricetes	Orthopolintovirales	Adintoviridae
SM1000_MG_virome_scaffold_1278_c1	SM1000_MG_virome_scaffold_1278_c1	MG_virome	yes	36538	No	67	7	1	Complete	High-quality	100	DTR (high-confidence)	1		11	0.9574	5	44.8389	Viruses;Duplodnaviria;Heunggongvirae;Uroviricota;Caudoviricetes	dsDNA	Prokaryote	Duplodnaviria	Heunggongvirae	Uroviricota	Caudoviricetes
SM1000_MG_virome_scaffold_1279_c1	SM1000_MG_virome_scaffold_1279_c1	MG_virome	yes	27025	No	29	8	1	Medium-quality	Genome-fragment	74.22	AAI-based (medium-confidence)	1		11	0.9733	2	14.1003	Viruses;Duplodnaviria;Heunggongvirae;Uroviricota;Caudoviricetes	dsDNA	Prokaryote	Duplodnaviria	Heunggongvirae	Uroviricota	Caudoviricetes
SM1000_MG_virome_scaffold_128_c2	SM1000_MG_virome_scaffold_128_c2	MG_virome	yes	10353	No	17	5	0	Low-quality	Genome-fragment	5.87	AAI-based (medium-confidence)	1		11	0.9799	2	8.5914	Viruses;Duplodnaviria;Heunggongvirae;Uroviricota;Caudoviricetes	dsDNA	Prokaryote	Duplodnaviria	Heunggongvirae	Uroviricota	Caudoviricetes
SM1000_MG_virome_scaffold_128_c3	SM1000_MG_virome_scaffold_128_c3	MG_virome	yes	25663	No	48	7	1	Low-quality	Genome-fragment	9.29	AAI-based (medium-confidence)	1		11	0.9749	1	25.1699	Viruses;Duplodnaviria;Heunggongvirae;Uroviricota;Caudoviricetes	dsDNA	Prokaryote	Duplodnaviria	Heunggongvirae	Uroviricota	Caudoviricetes
SM1000_MG_virome_scaffold_128_c6	SM1000_MG_virome_scaffold_128_c6	MG_virome	yes	35213	No	54	12	2	Low-quality	Genome-fragment	14.61	HMM-based (lower-bound)	1		11	0.9807	6	29.8493	Viruses;Duplodnaviria;Heunggongvirae;Uroviricota;Caudoviricetes	dsDNA	Prokaryote	Duplodnaviria	Heunggongvirae	Uroviricota	Caudoviricetes
SM1000_MG_virome_scaffold_1280_c1	SM1000_MG_virome_scaffold_1280_c1	MG_virome	yes	34758	No	60	12	0	Medium-quality	Genome-fragment	58.54	AAI-based (medium-confidence)	1		11	0.9752	2	24.5017	Viruses;Duplodnaviria;Heunggongvirae;Uroviricota;Caudoviricetes	dsDNA	Prokaryote	Duplodnaviria	Heunggongvirae	Uroviricota	Caudoviricetes
SM1000_MG_virome_scaffold_1281_c1	SM1000_MG_virome_scaffold_1281_c1	MG_virome	yes	36491	No	45	18	1	Medium-quality	Genome-fragment	61.41	HMM-based (lower-bound)	1		11	0.9743	9	46.8222	Viruses;Duplodnaviria;Heunggongvirae;Uroviricota;Caudoviricetes	dsDNA	Prokaryote	Duplodnaviria	Heunggongvirae	Uroviricota	Caudoviricetes
SM1000_MG_virome_scaffold_1282_c1	SM1000_MG_virome_scaffold_1282_c1	MG_virome	yes	36461	No	55	6	4	High-quality	High-quality	100	AAI-based (medium-confidence)	1		11	0.9692	4	18.4883	Viruses;Duplodnaviria;Heunggongvirae;Uroviricota;Caudoviricetes	dsDNA	Prokaryote	Duplodnaviria	Heunggongvirae	Uroviricota	Caudoviricetes
SM1000_MG_virome_scaffold_1283_c1	SM1000_MG_virome_scaffold_1283_c1	MG_virome	yes	36449	No	42	3	0	Complete	High-quality	100	DTR (high-confidence)	1		11	0.9542	2	9.4673	Viruses;Duplodnaviria;Heunggongvirae;Uroviricota;Caudoviricetes	dsDNA	Prokaryote	Duplodnaviria	Heunggongvirae	Uroviricota	Caudoviricetes
SM1000_MG_virome_scaffold_1284_c1_1|1-33505/36377	SM1000_MG_virome_scaffold_1284_c1_1|1-33505/36377	MG_virome	yes	33505	Yes	50	8	0	Medium-quality	Genome-fragment	88.89	AAI-based (medium-confidence)	1	1-33505	11	0.9752	3	27.4996	Viruses;Duplodnaviria;Heunggongvirae;Uroviricota;Caudoviricetes	dsDNA	Prokaryote	Duplodnaviria	Heunggongvirae	Uroviricota	Caudoviricetes
SM1000_MG_virome_scaffold_1285_c1	SM1000_MG_virome_scaffold_1285_c1	MG_virome	yes	36371	No	43	18	1	High-quality	High-quality	97.09	AAI-based (medium-confidence)	1.02		11	0.9692	11	39.721	Viruses;Duplodnaviria;Heunggongvirae;Uroviricota;Caudoviricetes	dsDNA	Prokaryote	Duplodnaviria	Heunggongvirae	Uroviricota	Caudoviricetes
SM1000_MG_virome_scaffold_1286_c1	SM1000_MG_virome_scaffold_1286_c1	MG_virome	yes	36370	No	91	3	2	Low-quality	Genome-fragment	46.31	HMM-based (lower-bound)	1		11	0.9737	1	12.7998	Viruses;Duplodnaviria;Heunggongvirae;Uroviricota;Caudoviricetes	dsDNA	Prokaryote	Duplodnaviria	Heunggongvirae	Uroviricota	Caudoviricetes
SM1000_MG_virome_scaffold_1287_c1	SM1000_MG_virome_scaffold_1287_c1	MG_virome	yes	36369	No	62	10	0	High-quality	High-quality	91.11	AAI-based (high-confidence)	1		11	0.9734	3	32.1744	Viruses;Duplodnaviria;Heunggongvirae;Uroviricota;Caudoviricetes	dsDNA	Prokaryote	Duplodnaviria	Heunggongvirae	Uroviricota	Caudoviricetes
SM1000_MG_virome_scaffold_1288_c2	SM1000_MG_virome_scaffold_1288_c2	MG_virome	yes	16084	No	27	1	1	Low-quality	Genome-fragment	5.35	HMM-based (lower-bound)	1		11	0.9787	0	13.0552	Viruses;Duplodnaviria;Heunggongvirae;Uroviricota;Caudoviricetes	dsDNA	Prokaryote	Duplodnaviria	Heunggongvirae	Uroviricota	Caudoviricetes
SM1000_MG_virome_scaffold_1288_c3	SM1000_MG_virome_scaffold_1288_c3	MG_virome	yes	14566	No	15	2	1	Low-quality	Genome-fragment	18.22	HMM-based (lower-bound)	1		11	0.9783	1	7.5457	Viruses;Duplodnaviria;Heunggongvirae;Uroviricota;Caudoviricetes	dsDNA	Prokaryote	Duplodnaviria	Heunggongvirae	Uroviricota	Caudoviricetes
SM1000_MG_virome_scaffold_1289_c1	SM1000_MG_virome_scaffold_1289_c1	MG_virome	yes	36299	No	58	2	1	Low-quality	Genome-fragment	36.04	HMM-based (lower-bound)	1		11	0.9716	2	24.7836	Viruses;Duplodnaviria;Heunggongvirae;Uroviricota;Caudoviricetes	dsDNA	Prokaryote	Duplodnaviria	Heunggongvirae	Uroviricota	Caudoviricetes
SM1000_MG_virome_scaffold_129_c1	SM1000_MG_virome_scaffold_129_c1	MG_virome	yes	90674	No	155	23	4	High-quality	High-quality	100	AAI-based (medium-confidence)	1		11	0.9505	5	57.9971	Viruses;Duplodnaviria;Heunggongvirae;Uroviricota;Caudoviricetes	dsDNA	Prokaryote	Duplodnaviria	Heunggongvirae	Uroviricota	Caudoviricetes
SM1000_MG_virome_scaffold_1291_c1	SM1000_MG_virome_scaffold_1291_c1	MG_virome	yes	36257	No	53	5	0	Complete	High-quality	100	DTR (high-confidence)	1		11	0.9768	4	24.4637	Viruses;Duplodnaviria;Heunggongvirae;Uroviricota;Caudoviricetes	dsDNA	Prokaryote	Duplodnaviria	Heunggongvirae	Uroviricota	Caudoviricetes
SM1000_MG_virome_scaffold_1292_c5	SM1000_MG_virome_scaffold_1292_c5	MG_virome	yes	14562	No	20	4	1	Low-quality	Genome-fragment	32.17	AAI-based (medium-confidence)	1		11	0.9744	3	15.6364	Viruses;Duplodnaviria;Heunggongvirae;Uroviricota;Caudoviricetes	dsDNA	Prokaryote	Duplodnaviria	Heunggongvirae	Uroviricota	Caudoviricetes
SM1000_MG_virome_scaffold_1293_c1	SM1000_MG_virome_scaffold_1293_c1	MG_virome	yes	36192	No	67	15	0	Medium-quality	Genome-fragment	88.68	AAI-based (medium-confidence)	1		11	0.967	7	37.284	Viruses;Duplodnaviria;Heunggongvirae;Uroviricota;Caudoviricetes	dsDNA	Prokaryote	Duplodnaviria	Heunggongvirae	Uroviricota	Caudoviricetes
SM1000_MG_virome_scaffold_1294_c1	SM1000_MG_virome_scaffold_1294_c1	MG_virome	yes	15834	No	24	4	0	Low-quality	Genome-fragment	40.76	AAI-based (medium-confidence)	1		11	0.9728	3	16.0215	Viruses;Duplodnaviria;Heunggongvirae;Uroviricota;Caudoviricetes	dsDNA	Prokaryote	Duplodnaviria	Heunggongvirae	Uroviricota	Caudoviricetes
SM1000_MG_virome_scaffold_1295_c3	SM1000_MG_virome_scaffold_1295_c3,SM1050_MG_virome_scaffold_1521_c1	MG_virome	yes	24488	No	23	3	0	Medium-quality	Genome-fragment	55.54	AAI-based (medium-confidence)	1		11	0.982	3	24.3281	Viruses;Duplodnaviria;Heunggongvirae;Uroviricota;Caudoviricetes	dsDNA	Prokaryote	Duplodnaviria	Heunggongvirae	Uroviricota	Caudoviricetes
SM1000_MG_virome_scaffold_1296_c3	SM1000_MG_virome_scaffold_1296_c3	MG_virome	yes	12708	No	11	1	0	Low-quality	Genome-fragment	19.33	HMM-based (lower-bound)	1		11	0.9559	0	6.5237	Viruses;Duplodnaviria;Heunggongvirae;Uroviricota;Caudoviricetes	dsDNA	Prokaryote	Duplodnaviria	Heunggongvirae	Uroviricota	Caudoviricetes
SM1000_MG_virome_scaffold_1296_c6	SM1000_MG_virome_scaffold_1296_c6	MG_virome	yes	10206	No	12	1	0	Low-quality	Genome-fragment	26.28	AAI-based (medium-confidence)	1		11	0.9783	2	11.9872	Viruses;Duplodnaviria;Heunggongvirae;Uroviricota;Caudoviricetes	dsDNA	Prokaryote	Duplodnaviria	Heunggongvirae	Uroviricota	Caudoviricetes
SM1000_MG_virome_scaffold_1297_c1	SM1000_MG_virome_scaffold_1297_c1	MG_virome	yes	10709	No	26	2	0	Low-quality	Genome-fragment	29.33	AAI-based (high-confidence)	1		11	0.9772	1	10.9784	Viruses;Duplodnaviria;Heunggongvirae;Uroviricota;Caudoviricetes	dsDNA	Prokaryote	Duplodnaviria	Heunggongvirae	Uroviricota	Caudoviricetes
SM1000_MG_virome_scaffold_1297_c3	SM1000_MG_virome_scaffold_1297_c3	MG_virome	yes	18850	No	29	6	0	Medium-quality	Genome-fragment	51.62	AAI-based (high-confidence)	1		11	0.9802	4	18.3022	Viruses;Duplodnaviria;Heunggongvirae;Uroviricota;Caudoviricetes	dsDNA	Prokaryote	Duplodnaviria	Heunggongvirae	Uroviricota	Caudoviricetes
SM1000_MG_virome_scaffold_1298_c3	SM1000_MG_virome_scaffold_1298_c3	MG_virome	yes	26912	No	48	5	0	Medium-quality	Genome-fragment	75.79	AAI-based (medium-confidence)	1		11	0.9684	3	18.1819	Viruses;Duplodnaviria;Heunggongvirae;Uroviricota;Caudoviricetes	dsDNA	Prokaryote	Duplodnaviria	Heunggongvirae	Uroviricota	Caudoviricetes
SM1000_MG_virome_scaffold_1299_c1	SM1000_MG_virome_scaffold_1299_c1,SM1031_MG_virome_scaffold_2070_c1	MG_virome	yes	36072	No	49	15	0	Complete	High-quality	100	DTR (medium-confidence)	1		11	0.9787	6	34.0058	Viruses;Duplodnaviria;Heunggongvirae;Uroviricota;Caudoviricetes	dsDNA	Prokaryote	Duplodnaviria	Heunggongvirae	Uroviricota	Caudoviricetes
SM1000_MG_virome_scaffold_13_c2	SM1000_MG_virome_scaffold_13_c2,SM1031_MG_virome_scaffold_9_c1|provirus_3_128529,SM1050_MG_virome_scaffold_78_c2,SM1030_MG_virome_scaffold_129_c1,SM1005_MG_virome_scaffold_58_c2,SM1031_MG_virome_scaffold_631_c1,SM1050_MG_virome_scaffold_600_c1,SM1004_MG_virome_scaffold_362_c1,SM1005_MG_virome_scaffold_58_c1,SM1004_MG_virome_scaffold_442_c2,SM1050_MG_virome_scaffold_63_c3,SM1050_MG_virome_scaffold…	MG_virome	yes	232457	No	332	25	7	High-quality	High-quality	100	AAI-based (medium-confidence)	1		11	0.9755	10	118.743	Viruses;Duplodnaviria;Heunggongvirae;Uroviricota;Caudoviricetes	dsDNA	Prokaryote	Duplodnaviria	Heunggongvirae	Uroviricota	Caudoviricetes
SM1000_MG_virome_scaffold_130_c1	SM1000_MG_virome_scaffold_130_c1	MG_virome	yes	90170	No	145	13	4	High-quality	High-quality	98.49	AAI-based (medium-confidence)	1		11	0.979	4	47.9925	Viruses;Duplodnaviria;Heunggongvirae;Uroviricota;Caudoviricetes	dsDNA	Prokaryote	Duplodnaviria	Heunggongvirae	Uroviricota	Caudoviricetes
SM1000_MG_virome_scaffold_1300_c1	SM1000_MG_virome_scaffold_1300_c1	MG_virome	yes	36070	No	62	8	0	High-quality	High-quality	94	AAI-based (high-confidence)	1		11	0.9193	7	25.8743	Viruses;Duplodnaviria;Heunggongvirae;Uroviricota;Caudoviricetes	dsDNA	Prokaryote	Duplodnaviria	Heunggongvirae	Uroviricota	Caudoviricetes
SM1000_MG_virome_scaffold_1303_c1	SM1000_MG_virome_scaffold_1303_c1	MG_virome	yes	36020	No	66	18	0	Medium-quality	Genome-fragment	55.18	HMM-based (lower-bound)	1		11	0.9776	8	38.3716	Viruses;Duplodnaviria;Heunggongvirae;Uroviricota;Caudoviricetes	dsDNA	Prokaryote	Duplodnaviria	Heunggongvirae	Uroviricota	Caudoviricetes
SM1000_MG_virome_scaffold_1304_c1	SM1000_MG_virome_scaffold_1304_c1	MG_virome	yes	10352	No	20	1	1	Low-quality	Genome-fragment	12.38	AAI-based (medium-confidence)	1		11	0.9385	0	2.2955	Viruses;Duplodnaviria;Heunggongvirae;Uroviricota;Caudoviricetes	dsDNA	Prokaryote	Duplodnaviria	Heunggongvirae	Uroviricota	Caudoviricetes
SM1000_MG_virome_scaffold_1304_c2	SM1000_MG_virome_scaffold_1304_c2	MG_virome	yes	24195	No	31	9	1	Low-quality	Genome-fragment	32.17	HMM-based (lower-bound)	1		11	0.9748	2	21.1692	Viruses;Duplodnaviria;Heunggongvirae;Uroviricota;Caudoviricetes	dsDNA	Prokaryote	Duplodnaviria	Heunggongvirae	Uroviricota	Caudoviricetes
SM1000_MG_virome_scaffold_1305_c1	SM1000_MG_virome_scaffold_1305_c1	MG_virome	yes	35980	No	49	14	0	Complete	High-quality	100	DTR (high-confidence)	1		11	0.9774	8	32.2772	Viruses;Duplodnaviria;Heunggongvirae;Uroviricota;Caudoviricetes	dsDNA	Prokaryote	Duplodnaviria	Heunggongvirae	Uroviricota	Caudoviricetes
SM1000_MG_virome_scaffold_1306_c5	SM1000_MG_virome_scaffold_1306_c5	MG_virome	yes	16899	No	12	1	0	Low-quality	Genome-fragment	35.62	HMM-based (lower-bound)	1		11	0.978	1	10.6104	Viruses;Duplodnaviria;Heunggongvirae;Uroviricota;Caudoviricetes	dsDNA	Prokaryote	Duplodnaviria	Heunggongvirae	Uroviricota	Caudoviricetes
SM1000_MG_virome_scaffold_1306_c6	SM1000_MG_virome_scaffold_1306_c6	MG_virome	yes	10271	No	12	4	0	Low-quality	Genome-fragment	25.87	AAI-based (medium-confidence)	1		11	0.9755	2	7.5861	Viruses;Duplodnaviria;Heunggongvirae;Uroviricota;Caudoviricetes	dsDNA	Prokaryote	Duplodnaviria	Heunggongvirae	Uroviricota	Caudoviricetes
SM1000_MG_virome_scaffold_1307_c1	SM1000_MG_virome_scaffold_1307_c1	MG_virome	yes	35957	No	60	9	1	High-quality	High-quality	100	AAI-based (high-confidence)	1.01		11	0.9811	2	44.3437	Viruses;Duplodnaviria;Heunggongvirae;Uroviricota;Caudoviricetes	dsDNA	Prokaryote	Duplodnaviria	Heunggongvirae	Uroviricota	Caudoviricetes
SM1000_MG_virome_scaffold_1308_c1	SM1000_MG_virome_scaffold_1308_c1	MG_virome	yes	35954	No	50	8	0	Low-quality	Genome-fragment	36.23	HMM-based (lower-bound)	1		11	0.9718	4	34.926	Viruses;Duplodnaviria;Heunggongvirae;Uroviricota;Caudoviricetes	dsDNA	Prokaryote	Duplodnaviria	Heunggongvirae	Uroviricota	Caudoviricetes
SM1000_MG_virome_scaffold_1309_c1	SM1000_MG_virome_scaffold_1309_c1	MG_virome	yes	35943	No	52	8	1	High-quality	High-quality	98.16	AAI-based (medium-confidence)	1		11	0.9613	6	17.5293	Viruses;Duplodnaviria;Heunggongvirae;Uroviricota;Caudoviricetes	dsDNA	Prokaryote	Duplodnaviria	Heunggongvirae	Uroviricota	Caudoviricetes
SM1000_MG_virome_scaffold_131_c2	SM1000_MG_virome_scaffold_131_c2	MG_virome	yes	28610	No	35	2	2	Low-quality	Genome-fragment	5	AAI-based (medium-confidence)	1		11	0.9634	3	11.7281	Viruses;Duplodnaviria;Heunggongvirae;Uroviricota;Caudoviricetes	dsDNA	Prokaryote	Duplodnaviria	Heunggongvirae	Uroviricota	Caudoviricetes
SM1000_MG_virome_scaffold_131_c3	SM1000_MG_virome_scaffold_131_c3	MG_virome	yes	16061	No	34	2	2	Low-quality	Genome-fragment	7.46	HMM-based (lower-bound)	1		11	0.9641	0	10.7234	Viruses;Duplodnaviria;Heunggongvirae;Uroviricota;Caudoviricetes;Kyanoviridae	dsDNA	Prokaryote	Duplodnaviria	Heunggongvirae	Uroviricota	Caudoviricetes		Kyanoviridae
SM1000_MG_virome_scaffold_131_c4_1|5019-33249/33249	SM1000_MG_virome_scaffold_131_c4_1|5019-33249/33249	MG_virome	yes	28231	Yes	40	9	1	Low-quality	Genome-fragment	7.39	AAI-based (medium-confidence)	1	5019-33249	11	0.9683	2	23.6065	Viruses;Duplodnaviria;Heunggongvirae;Uroviricota;Caudoviricetes	dsDNA	Prokaryote	Duplodnaviria	Heunggongvirae	Uroviricota	Caudoviricetes
SM1000_MG_virome_scaffold_1310_c2	SM1000_MG_virome_scaffold_1310_c2	MG_virome	yes	12812	No	34	5	1	Low-quality	Genome-fragment	34.93	AAI-based (medium-confidence)	1		11	0.8941	1	13.3798	Viruses;Duplodnaviria;Heunggongvirae;Uroviricota;Caudoviricetes	dsDNA	Prokaryote	Duplodnaviria	Heunggongvirae	Uroviricota	Caudoviricetes
SM1000_MG_virome_scaffold_1310_c4	SM1000_MG_virome_scaffold_1310_c4	MG_virome	yes	15422	No	18	5	0	Low-quality	Genome-fragment	40.66	AAI-based (high-confidence)	1		11	0.9712	6	12.6997	Viruses;Duplodnaviria;Heunggongvirae;Uroviricota;Caudoviricetes	dsDNA	Prokaryote	Duplodnaviria	Heunggongvirae	Uroviricota	Caudoviricetes
SM1000_MG_virome_scaffold_1311_c1	SM1000_MG_virome_scaffold_1311_c1	MG_virome	yes	35923	No	50	4	0	Medium-quality	Genome-fragment	76.29	AAI-based (medium-confidence)	1		11	0.9789	0	19.1655	Viruses;Duplodnaviria;Heunggongvirae;Uroviricota;Caudoviricetes	dsDNA	Prokaryote	Duplodnaviria	Heunggongvirae	Uroviricota	Caudoviricetes
SM1000_MG_virome_scaffold_1312_c1	SM1000_MG_virome_scaffold_1312_c1	MG_virome	yes	15145	No	31	8	0	Low-quality	Genome-fragment	34.79	AAI-based (medium-confidence)	1		11	0.9704	5	20.0616	Viruses;Duplodnaviria;Heunggongvirae;Uroviricota;Caudoviricetes	dsDNA	Prokaryote	Duplodnaviria	Heunggongvirae	Uroviricota	Caudoviricetes
SM1000_MG_virome_scaffold_1312_c2	SM1000_MG_virome_scaffold_1312_c2	MG_virome	yes	20674	No	20	8	0	Low-quality	Genome-fragment	47.4	AAI-based (medium-confidence)	1		11	0.9771	2	16.8603	Viruses;Duplodnaviria;Heunggongvirae;Uroviricota;Caudoviricetes	dsDNA	Prokaryote	Duplodnaviria	Heunggongvirae	Uroviricota	Caudoviricetes
SM1000_MG_virome_scaffold_1314_c1	SM1000_MG_virome_scaffold_1314_c1	MG_virome	yes	35803	No	45	15	3	Low-quality	Genome-fragment	49.98	HMM-based (lower-bound)	1		11	0.926	4	38.6417	Viruses;Duplodnaviria;Heunggongvirae;Uroviricota;Caudoviricetes	dsDNA	Prokaryote	Duplodnaviria	Heunggongvirae	Uroviricota	Caudoviricetes
SM1000_MG_virome_scaffold_1315_c1	SM1000_MG_virome_scaffold_1315_c1	MG_virome	yes	13226	No	17	4	0	Low-quality	Genome-fragment	40.8	AAI-based (high-confidence)	1		11	0.9824	2	19.864	Viruses;Duplodnaviria;Heunggongvirae;Uroviricota;Caudoviricetes	dsDNA	Prokaryote	Duplodnaviria	Heunggongvirae	Uroviricota	Caudoviricetes
SM1000_MG_virome_scaffold_1316_c4	SM1000_MG_virome_scaffold_1316_c4	MG_virome	yes	20147	No	20	10	0	Low-quality	Genome-fragment	46.57	AAI-based (medium-confidence)	1		11	0.979	4	23.6058	Viruses;Duplodnaviria;Heunggongvirae;Uroviricota;Caudoviricetes	dsDNA	Prokaryote	Duplodnaviria	Heunggongvirae	Uroviricota	Caudoviricetes
SM1000_MG_virome_scaffold_1317_c2	SM1000_MG_virome_scaffold_1317_c2	MG_virome	yes	21431	No	42	1	1	Low-quality	Genome-fragment	19.76	HMM-based (lower-bound)	1		11	0.9491	0	7.1716	Viruses;Duplodnaviria;Heunggongvirae;Uroviricota;Caudoviricetes	dsDNA	Prokaryote	Duplodnaviria	Heunggongvirae	Uroviricota	Caudoviricetes
SM1000_MG_virome_scaffold_1318_c1	SM1000_MG_virome_scaffold_1318_c1	MG_virome	yes	17163	No	30	6	0	Low-quality	Genome-fragment	21.37	AAI-based (high-confidence)	1		11	0.9092	2	5.6555	Viruses;Duplodnaviria;Heunggongvirae;Uroviricota;Caudoviricetes	dsDNA	Prokaryote	Duplodnaviria	Heunggongvirae	Uroviricota	Caudoviricetes
SM1000_MG_virome_scaffold_1319_c1	SM1000_MG_virome_scaffold_1319_c1	MG_virome	yes	35624	No	52	5	0	High-quality	High-quality	100	AAI-based (high-confidence)	1		11	0.9459	1	25.382	Viruses;Duplodnaviria;Heunggongvirae;Uroviricota;Caudoviricetes	dsDNA	Prokaryote	Duplodnaviria	Heunggongvirae	Uroviricota	Caudoviricetes
SM1000_MG_virome_scaffold_132_c1	SM1000_MG_virome_scaffold_132_c1	MG_virome	yes	88765	No	139	21	3	Medium-quality	Genome-fragment	89.09	HMM-based (lower-bound)	1		11	0.9671	6	63.319	Viruses;Duplodnaviria;Heunggongvirae;Uroviricota;Caudoviricetes	dsDNA	Prokaryote	Duplodnaviria	Heunggongvirae	Uroviricota	Caudoviricetes
SM1000_MG_virome_scaffold_1320_c1	SM1000_MG_virome_scaffold_1320_c1	MG_virome	yes	35611	No	65	11	0	Low-quality	Genome-fragment	49.32	HMM-based (lower-bound)	1		11	0.975	5	17.1159	Viruses;Duplodnaviria;Heunggongvirae;Uroviricota;Caudoviricetes	dsDNA	Prokaryote	Duplodnaviria	Heunggongvirae	Uroviricota	Caudoviricetes
SM1000_MG_virome_scaffold_1321_c1	SM1000_MG_virome_scaffold_1321_c1,SM1028_MG_virome_scaffold_278_c1,SM1027_MG_virome_scaffold_490_c1,SM1050_MG_virome_scaffold_2432_c1,SM1027_MG_virome_scaffold_899_c1	MG_virome	yes	33682	No	37	9	0	Low-quality	Genome-fragment	49.67	AAI-based (medium-confidence)	1		11	0.9758	3	29.0872	Viruses;Duplodnaviria;Heunggongvirae;Uroviricota;Caudoviricetes	dsDNA	Prokaryote	Duplodnaviria	Heunggongvirae	Uroviricota	Caudoviricetes
SM1000_MG_virome_scaffold_1323_c1	SM1000_MG_virome_scaffold_1323_c1	MG_virome	yes	19282	No	28	3	0	Low-quality	Genome-fragment	39.34	AAI-based (medium-confidence)	1		11	0.9775	1	16.8523	Viruses;Duplodnaviria;Heunggongvirae;Uroviricota;Caudoviricetes	dsDNA	Prokaryote	Duplodnaviria	Heunggongvirae	Uroviricota	Caudoviricetes
SM1000_MG_virome_scaffold_1323_c2	SM1000_MG_virome_scaffold_1323_c2	MG_virome	yes	16273	No	25	6	0	Low-quality	Genome-fragment	32.97	AAI-based (medium-confidence)	1		11	0.9725	2	13.0021	Viruses;Duplodnaviria;Heunggongvirae;Uroviricota;Caudoviricetes	dsDNA	Prokaryote	Duplodnaviria	Heunggongvirae	Uroviricota	Caudoviricetes
SM1000_MG_virome_scaffold_1324_c2	SM1000_MG_virome_scaffold_1324_c2	MG_virome	yes	27821	No	46	11	2	Low-quality	Genome-fragment	29.75	AAI-based (medium-confidence)	1		11	0.9787	3	23.2024	Viruses;Duplodnaviria;Heunggongvirae;Uroviricota;Caudoviricetes	dsDNA	Prokaryote	Duplodnaviria	Heunggongvirae	Uroviricota	Caudoviricetes
SM1000_MG_virome_scaffold_1326_c5	SM1000_MG_virome_scaffold_1326_c5	MG_virome	yes	11728	No	10	2	0	Low-quality	Genome-fragment	5.92	HMM-based (lower-bound)	1		11	0.9471	0	3.3989	Viruses;Duplodnaviria;Heunggongvirae;Uroviricota;Caudoviricetes	dsDNA	Prokaryote	Duplodnaviria	Heunggongvirae	Uroviricota	Caudoviricetes
SM1000_MG_virome_scaffold_1327_c2	SM1000_MG_virome_scaffold_1327_c2	MG_virome	yes	12158	No	5	1	0	Low-quality	Genome-fragment	6.47	HMM-based (lower-bound)	1		11	0.9383	0	2.3044	Viruses;Duplodnaviria;Heunggongvirae;Uroviricota;Caudoviricetes	dsDNA	Prokaryote	Duplodnaviria	Heunggongvirae	Uroviricota	Caudoviricetes
SM1000_MG_virome_scaffold_1328_c4	SM1000_MG_virome_scaffold_1328_c4	MG_virome	yes	11149	No	10	4	0	Low-quality	Genome-fragment	14.98	AAI-based (medium-confidence)	1		11	0.9764	1	9.7332	Viruses;Duplodnaviria;Heunggongvirae;Uroviricota;Caudoviricetes	dsDNA	Prokaryote	Duplodnaviria	Heunggongvirae	Uroviricota	Caudoviricetes
SM1000_MG_virome_scaffold_1329_c1	SM1000_MG_virome_scaffold_1329_c1	MG_virome	yes	35483	No	57	12	0	Low-quality	Genome-fragment	38.77	HMM-based (lower-bound)	1.01		11	0.9729	7	26.9102	Viruses;Duplodnaviria;Heunggongvirae;Uroviricota;Caudoviricetes	dsDNA	Prokaryote	Duplodnaviria	Heunggongvirae	Uroviricota	Caudoviricetes
SM1000_MG_virome_scaffold_133_c1	SM1000_MG_virome_scaffold_133_c1	MG_virome	yes	88326	No	131	39	1	Complete	High-quality	100	DTR (high-confidence)	1		11	0.9651	9	66.3191	Viruses;Duplodnaviria;Heunggongvirae;Uroviricota;Caudoviricetes	dsDNA	Prokaryote	Duplodnaviria	Heunggongvirae	Uroviricota	Caudoviricetes
SM1000_MG_virome_scaffold_1330_c1	SM1000_MG_virome_scaffold_1330_c1	MG_virome	yes	15839	No	24	3	2	Low-quality	Genome-fragment	11.6	HMM-based (lower-bound)	1		11	0.9612	0	10.4578	Viruses;Duplodnaviria;Heunggongvirae;Uroviricota;Caudoviricetes	dsDNA	Prokaryote	Duplodnaviria	Heunggongvirae	Uroviricota	Caudoviricetes
SM1000_MG_virome_scaffold_1330_c2	SM1000_MG_virome_scaffold_1330_c2	MG_virome	yes	19611	No	25	7	0	Low-quality	Genome-fragment	44.58	AAI-based (medium-confidence)	1		11	0.9704	7	18.6402	Viruses;Duplodnaviria;Heunggongvirae;Uroviricota;Caudoviricetes	dsDNA	Prokaryote	Duplodnaviria	Heunggongvirae	Uroviricota	Caudoviricetes
SM1000_MG_virome_scaffold_1331_c1	SM1000_MG_virome_scaffold_1331_c1	MG_virome	yes	35432	No	58	12	0	Complete	High-quality	100	DTR (high-confidence)	1		11	0.9636	7	29.8483	Viruses;Duplodnaviria;Heunggongvirae;Uroviricota;Caudoviricetes	dsDNA	Prokaryote	Duplodnaviria	Heunggongvirae	Uroviricota	Caudoviricetes
SM1000_MG_virome_scaffold_1332_c1	SM1000_MG_virome_scaffold_1332_c1	MG_virome	yes	35427	No	46	4	2	Low-quality	Genome-fragment	25.58	HMM-based (lower-bound)	1.01		11	0.9381	5	14.3496	Viruses;Duplodnaviria;Heunggongvirae;Uroviricota;Caudoviricetes	dsDNA	Prokaryote	Duplodnaviria	Heunggongvirae	Uroviricota	Caudoviricetes
SM1000_MG_virome_scaffold_1333_c3	SM1000_MG_virome_scaffold_1333_c3	MG_virome	yes	18599	No	31	5	0	Low-quality	Genome-fragment	24.71	HMM-based (lower-bound)	1		11	0.965	2	16.4248	Viruses;Duplodnaviria;Heunggongvirae;Uroviricota;Caudoviricetes	dsDNA	Prokaryote	Duplodnaviria	Heunggongvirae	Uroviricota	Caudoviricetes
SM1000_MG_virome_scaffold_1334_c1	SM1000_MG_virome_scaffold_1334_c1	MG_virome	yes	29644	No	57	15	0	Medium-quality	Genome-fragment	55.57	AAI-based (medium-confidence)	1		11	0.9767	4	30.626	Viruses;Duplodnaviria;Heunggongvirae;Uroviricota;Caudoviricetes	dsDNA	Prokaryote	Duplodnaviria	Heunggongvirae	Uroviricota	Caudoviricetes
SM1000_MG_virome_scaffold_1337_c1	SM1000_MG_virome_scaffold_1337_c1	MG_virome	yes	35311	No	47	6	0	Medium-quality	Genome-fragment	73.65	AAI-based (medium-confidence)	1		11	0.9758	1	18.0003	Viruses;Duplodnaviria;Heunggongvirae;Uroviricota;Caudoviricetes	dsDNA	Prokaryote	Duplodnaviria	Heunggongvirae	Uroviricota	Caudoviricetes
SM1000_MG_virome_scaffold_1338_c5	SM1000_MG_virome_scaffold_1338_c5	MG_virome	yes	12621	No	11	9	0	Low-quality	Genome-fragment	26.76	AAI-based (medium-confidence)	1		11	0.9827	2	18.9011	Viruses;Duplodnaviria;Heunggongvirae;Uroviricota;Caudoviricetes;Zobellviridae	dsDNA	Prokaryote	Duplodnaviria	Heunggongvirae	Uroviricota	Caudoviricetes		Zobellviridae
SM1000_MG_virome_scaffold_1339_c4	SM1000_MG_virome_scaffold_1339_c4	MG_virome	yes	15471	No	21	1	0	Low-quality	Genome-fragment	22.39	HMM-based (lower-bound)	1		11	0.9347	0	1.7382	Viruses;Duplodnaviria;Heunggongvirae;Uroviricota;Caudoviricetes	dsDNA	Prokaryote	Duplodnaviria	Heunggongvirae	Uroviricota	Caudoviricetes
SM1000_MG_virome_scaffold_134_c1	SM1000_MG_virome_scaffold_134_c1	MG_virome	yes	87778	No	96	25	3	Low-quality	Genome-fragment	22.78	AAI-based (high-confidence)	1		11	0.972	4	83.4109	Viruses;Duplodnaviria;Heunggongvirae;Uroviricota;Caudoviricetes	dsDNA	Prokaryote	Duplodnaviria	Heunggongvirae	Uroviricota	Caudoviricetes
SM1000_MG_virome_scaffold_1340_c1	SM1000_MG_virome_scaffold_1340_c1	MG_virome	yes	35162	No	50	12	0	Complete	High-quality	100	DTR (high-confidence)	1		11	0.9773	5	25.9647	Viruses;Duplodnaviria;Heunggongvirae;Uroviricota;Caudoviricetes	dsDNA	Prokaryote	Duplodnaviria	Heunggongvirae	Uroviricota	Caudoviricetes
SM1000_MG_virome_scaffold_1341_c1	SM1000_MG_virome_scaffold_1341_c1	MG_virome	yes	35155	No	58	16	0	Medium-quality	Genome-fragment	60.9	HMM-based (lower-bound)	1		11	0.9798	9	33.8367	Viruses;Duplodnaviria;Heunggongvirae;Uroviricota;Caudoviricetes	dsDNA	Prokaryote	Duplodnaviria	Heunggongvirae	Uroviricota	Caudoviricetes
SM1000_MG_virome_scaffold_1342_c1	SM1000_MG_virome_scaffold_1342_c1,SM1029_MG_virome_scaffold_502_c1,SM1031_MG_virome_scaffold_3695_c1	MG_virome	yes	32508	No	49	4	0	Medium-quality	Genome-fragment	69.21	AAI-based (medium-confidence)	1		11	0.9601	5	16.206	Viruses;Duplodnaviria;Heunggongvirae;Uroviricota;Caudoviricetes	dsDNA	Prokaryote	Duplodnaviria	Heunggongvirae	Uroviricota	Caudoviricetes
SM1000_MG_virome_scaffold_1343_c2	SM1000_MG_virome_scaffold_1343_c2	MG_virome	yes	30834	No	56	4	2	Low-quality	Genome-fragment	20.8	HMM-based (lower-bound)	1		11	0.9615	4	18.4693	Viruses;Duplodnaviria;Heunggongvirae;Uroviricota;Caudoviricetes	dsDNA	Prokaryote	Duplodnaviria	Heunggongvirae	Uroviricota	Caudoviricetes
SM1000_MG_virome_scaffold_1344_c1	SM1000_MG_virome_scaffold_1344_c1	MG_virome	yes	35117	No	40	2	0	Medium-quality	Genome-fragment	62.83	AAI-based (medium-confidence)	1.01		11	0.9599	4	20.6922	Viruses;Duplodnaviria;Heunggongvirae;Uroviricota;Caudoviricetes	dsDNA	Prokaryote	Duplodnaviria	Heunggongvirae	Uroviricota	Caudoviricetes
SM1000_MG_virome_scaffold_1345_c1	SM1000_MG_virome_scaffold_1345_c1	MG_virome	yes	26436	No	37	5	2	Low-quality	Genome-fragment	43.96	AAI-based (medium-confidence)	1		11	0.9789	5	17.9045	Viruses;Duplodnaviria;Heunggongvirae;Uroviricota;Caudoviricetes	dsDNA	Prokaryote	Duplodnaviria	Heunggongvirae	Uroviricota	Caudoviricetes
SM1000_MG_virome_scaffold_1346_c1	SM1000_MG_virome_scaffold_1346_c1	MG_virome	yes	35103	No	45	14	0	High-quality	High-quality	92.39	AAI-based (medium-confidence)	1.02		11	0.9805	6	36.2114	Viruses;Duplodnaviria;Heunggongvirae;Uroviricota;Caudoviricetes	dsDNA	Prokaryote	Duplodnaviria	Heunggongvirae	Uroviricota	Caudoviricetes
SM1000_MG_virome_scaffold_1347_c1	SM1000_MG_virome_scaffold_1347_c1	MG_virome	yes	35073	No	45	4	1	Low-quality	Genome-fragment	49.3	AAI-based (medium-confidence)	1		11	0.976	2	17.8723	Viruses;Duplodnaviria;Heunggongvirae;Uroviricota;Caudoviricetes	dsDNA	Prokaryote	Duplodnaviria	Heunggongvirae	Uroviricota	Caudoviricetes
SM1000_MG_virome_scaffold_1348_c1	SM1000_MG_virome_scaffold_1348_c1	MG_virome	yes	23629	No	32	3	1	Low-quality	Genome-fragment	16.05	AAI-based (medium-confidence)	1		11	0.9624	1	39.0932	Viruses;Duplodnaviria;Heunggongvirae;Uroviricota;Caudoviricetes	dsDNA	Prokaryote	Duplodnaviria	Heunggongvirae	Uroviricota	Caudoviricetes
SM1000_MG_virome_scaffold_1348_c2	SM1000_MG_virome_scaffold_1348_c2	MG_virome	yes	10778	No	16	2	0	Low-quality	Genome-fragment	6.58	HMM-based (lower-bound)	1		11	0.9582	1	10.1096	Viruses;Duplodnaviria;Heunggongvirae;Uroviricota;Caudoviricetes	dsDNA	Prokaryote	Duplodnaviria	Heunggongvirae	Uroviricota	Caudoviricetes
SM1000_MG_virome_scaffold_1349_c1	SM1000_MG_virome_scaffold_1349_c1,SM1004_MG_virome_scaffold_1266_c1	MG_virome	yes	35050	No	50	12	0	Medium-quality	Genome-fragment	72.12	AAI-based (high-confidence)	1.01		11	0.9726	2	31.0313	Viruses;Duplodnaviria;Heunggongvirae;Uroviricota;Caudoviricetes	dsDNA	Prokaryote	Duplodnaviria	Heunggongvirae	Uroviricota	Caudoviricetes
SM1000_MG_virome_scaffold_135_c1	SM1000_MG_virome_scaffold_135_c1	MG_virome	yes	87170	No	148	18	1	Complete	High-quality	100	DTR (high-confidence)	1		11	0.9783	4	63.3272	Viruses;Duplodnaviria;Heunggongvirae;Uroviricota;Caudoviricetes	dsDNA	Prokaryote	Duplodnaviria	Heunggongvirae	Uroviricota	Caudoviricetes
SM1000_MG_virome_scaffold_1350_c1	SM1000_MG_virome_scaffold_1350_c1	MG_virome	yes	35030	No	47	6	1	Low-quality	Genome-fragment	37.4	AAI-based (medium-confidence)	1		11	0.9767	4	35.9927	Viruses;Duplodnaviria;Heunggongvirae;Uroviricota;Caudoviricetes	dsDNA	Prokaryote	Duplodnaviria	Heunggongvirae	Uroviricota	Caudoviricetes
SM1000_MG_virome_scaffold_1352_c2	SM1000_MG_virome_scaffold_1352_c2	MG_virome	yes	22701	No	42	9	1	Low-quality	Genome-fragment	38.66	AAI-based (medium-confidence)	1		11	0.9681	6	23.0867	Viruses;Duplodnaviria;Heunggongvirae;Uroviricota;Caudoviricetes	dsDNA	Prokaryote	Duplodnaviria	Heunggongvirae	Uroviricota	Caudoviricetes
SM1000_MG_virome_scaffold_1352_c3	SM1000_MG_virome_scaffold_1352_c3	MG_virome	yes	10310	No	25	10	0	Low-quality	Genome-fragment	12.2	HMM-based (lower-bound)	1		11	0.9766	4	19.8147	Viruses;Duplodnaviria;Heunggongvirae;Uroviricota;Caudoviricetes	dsDNA	Prokaryote	Duplodnaviria	Heunggongvirae	Uroviricota	Caudoviricetes
SM1000_MG_virome_scaffold_1353_c1	SM1000_MG_virome_scaffold_1353_c1	MG_virome	yes	23370	No	54	2	0	Low-quality	Genome-fragment	14.06	HMM-based (lower-bound)	1		11	0.9781	0	14.1077	Viruses;Duplodnaviria;Heunggongvirae;Uroviricota;Caudoviricetes	dsDNA	Prokaryote	Duplodnaviria	Heunggongvirae	Uroviricota	Caudoviricetes
SM1000_MG_virome_scaffold_1354_c7	SM1000_MG_virome_scaffold_1354_c7	MG_virome	yes	14648	No	21	8	0	Low-quality	Genome-fragment	30.54	AAI-based (medium-confidence)	1		11	0.9715	4	16.5564	Viruses;Duplodnaviria;Heunggongvirae;Uroviricota;Caudoviricetes	dsDNA	Prokaryote	Duplodnaviria	Heunggongvirae	Uroviricota	Caudoviricetes
SM1000_MG_virome_scaffold_1355_c2	SM1000_MG_virome_scaffold_1355_c2	MG_virome	yes	18676	No	23	4	1	Low-quality	Genome-fragment	11.05	AAI-based (high-confidence)	1		11	0.9627	4	9.5436	Viruses;Duplodnaviria;Heunggongvirae;Uroviricota;Caudoviricetes;Herelleviridae	dsDNA	Prokaryote	Duplodnaviria	Heunggongvirae	Uroviricota	Caudoviricetes		Herelleviridae
SM1000_MG_virome_scaffold_1355_c5	SM1000_MG_virome_scaffold_1355_c5	MG_virome	yes	11278	No	22	1	0	Low-quality	Genome-fragment	11.65	AAI-based (high-confidence)	1		11	0.9389	0	5.7622	Viruses;Duplodnaviria;Heunggongvirae;Uroviricota;Caudoviricetes	dsDNA	Prokaryote	Duplodnaviria	Heunggongvirae	Uroviricota	Caudoviricetes
SM1000_MG_virome_scaffold_1356_c3	SM1000_MG_virome_scaffold_1356_c3	MG_virome	yes	11047	No	8	2	0	Low-quality	Genome-fragment	6.61	AAI-based (medium-confidence)	1		11	0.9778	1	6.8731	Viruses;Duplodnaviria;Heunggongvirae;Uroviricota;Caudoviricetes	dsDNA	Prokaryote	Duplodnaviria	Heunggongvirae	Uroviricota	Caudoviricetes
SM1000_MG_virome_scaffold_1358_c2	SM1000_MG_virome_scaffold_1358_c2	MG_virome	yes	15755	No	14	1	0	Low-quality	Genome-fragment	13.16	AAI-based (medium-confidence)	1		11	0.8883	0	0.9262	Viruses;Duplodnaviria;Heunggongvirae;Uroviricota;Caudoviricetes	dsDNA	Prokaryote	Duplodnaviria	Heunggongvirae	Uroviricota	Caudoviricetes
SM1000_MG_virome_scaffold_1358_c3	SM1000_MG_virome_scaffold_1358_c3,SM1050_MG_virome_scaffold_3300_c1	MG_virome	yes	18149	No	18	3	1	Low-quality	Genome-fragment	15.16	AAI-based (high-confidence)	1		11	0.9807	3	9.8848	Viruses;Duplodnaviria;Heunggongvirae;Uroviricota;Caudoviricetes	dsDNA	Prokaryote	Duplodnaviria	Heunggongvirae	Uroviricota	Caudoviricetes
SM1000_MG_virome_scaffold_1359_c2	SM1000_MG_virome_scaffold_1359_c2	MG_virome	yes	26212	No	41	3	1	Low-quality	Genome-fragment	24.44	HMM-based (lower-bound)	1		11	0.9801	1	11.8941	Viruses;Duplodnaviria;Heunggongvirae;Uroviricota;Caudoviricetes	dsDNA	Prokaryote	Duplodnaviria	Heunggongvirae	Uroviricota	Caudoviricetes
SM1000_MG_virome_scaffold_136_c1	SM1000_MG_virome_scaffold_136_c1	MG_virome	yes	32602	No	27	5	1	Low-quality	Genome-fragment	38.94	AAI-based (medium-confidence)	1		11	0.9588	1	22.2214	Viruses;Duplodnaviria;Heunggongvirae;Uroviricota;Caudoviricetes	dsDNA	Prokaryote	Duplodnaviria	Heunggongvirae	Uroviricota	Caudoviricetes
SM1000_MG_virome_scaffold_136_c2	SM1000_MG_virome_scaffold_136_c2	MG_virome	yes	54440	No	95	18	1	Medium-quality	Genome-fragment	66.1	AAI-based (high-confidence)	1		11	0.9665	9	55.0258	Viruses;Duplodnaviria;Heunggongvirae;Uroviricota;Caudoviricetes	dsDNA	Prokaryote	Duplodnaviria	Heunggongvirae	Uroviricota	Caudoviricetes
SM1000_MG_virome_scaffold_1360_c4	SM1000_MG_virome_scaffold_1360_c4	MG_virome	yes	17578	No	12	2	0	Low-quality	Genome-fragment	23.7	AAI-based (medium-confidence)	1		11	0.9761	0	6.6294	Viruses;Duplodnaviria;Heunggongvirae;Uroviricota;Caudoviricetes	dsDNA	Prokaryote	Duplodnaviria	Heunggongvirae	Uroviricota	Caudoviricetes
SM1000_MG_virome_scaffold_1361_c1	SM1000_MG_virome_scaffold_1361_c1	MG_virome	yes	34665	No	37	5	0	Medium-quality	Genome-fragment	68.38	AAI-based (medium-confidence)	1		11	0.9767	2	24.1181	Viruses;Duplodnaviria;Heunggongvirae;Uroviricota;Caudoviricetes	dsDNA	Prokaryote	Duplodnaviria	Heunggongvirae	Uroviricota	Caudoviricetes
SM1000_MG_virome_scaffold_1364_c1	SM1000_MG_virome_scaffold_1364_c1	MG_virome	yes	33684	No	44	17	0	High-quality	High-quality	91.92	AAI-based (high-confidence)	1		11	0.977	8	47.9478	Viruses;Duplodnaviria;Heunggongvirae;Uroviricota;Caudoviricetes	dsDNA	Prokaryote	Duplodnaviria	Heunggongvirae	Uroviricota	Caudoviricetes
SM1000_MG_virome_scaffold_1365_c2	SM1000_MG_virome_scaffold_1365_c2	MG_virome	yes	13073	No	24	2	1	Low-quality	Genome-fragment	10.2	HMM-based (lower-bound)	1		11	0.9622	0	5.8535	Viruses;Duplodnaviria;Heunggongvirae;Uroviricota;Caudoviricetes	dsDNA	Prokaryote	Duplodnaviria	Heunggongvirae	Uroviricota	Caudoviricetes
SM1000_MG_virome_scaffold_1365_c3	SM1000_MG_virome_scaffold_1365_c3	MG_virome	yes	20913	No	50	7	0	Low-quality	Genome-fragment	41.16	AAI-based (medium-confidence)	1		11	0.9795	6	21.603	Viruses;Duplodnaviria;Heunggongvirae;Uroviricota;Caudoviricetes	dsDNA	Prokaryote	Duplodnaviria	Heunggongvirae	Uroviricota	Caudoviricetes
SM1000_MG_virome_scaffold_1366_c1	SM1000_MG_virome_scaffold_1366_c1	MG_virome	yes	16501	No	29	5	0	Low-quality	Genome-fragment	23.5	HMM-based (lower-bound)	1		11	0.9495	1	14.6026	Viruses;Duplodnaviria;Heunggongvirae;Uroviricota;Caudoviricetes	dsDNA	Prokaryote	Duplodnaviria	Heunggongvirae	Uroviricota	Caudoviricetes
SM1000_MG_virome_scaffold_1369_c1	SM1000_MG_virome_scaffold_1369_c1	MG_virome	yes	32619	No	59	11	0	Low-quality	Genome-fragment	42.88	HMM-based (lower-bound)	1		11	0.9739	6	23.2444	Viruses;Duplodnaviria;Heunggongvirae;Uroviricota;Caudoviricetes	dsDNA	Prokaryote	Duplodnaviria	Heunggongvirae	Uroviricota	Caudoviricetes
SM1000_MG_virome_scaffold_137_c1	SM1000_MG_virome_scaffold_137_c1	MG_virome	yes	86929	No	143	31	2	High-quality	High-quality	100	AAI-based (medium-confidence)	1		11	0.9759	2	58.1099	Viruses;Duplodnaviria;Heunggongvirae;Uroviricota;Caudoviricetes	dsDNA	Prokaryote	Duplodnaviria	Heunggongvirae	Uroviricota	Caudoviricetes
SM1000_MG_virome_scaffold_1370_c1	SM1000_MG_virome_scaffold_1370_c1	MG_virome	yes	34143	No	61	25	0	Medium-quality	Genome-fragment	63.52	AAI-based (high-confidence)	1		11	0.9796	9	44.1563	Viruses;Duplodnaviria;Heunggongvirae;Uroviricota;Caudoviricetes	dsDNA	Prokaryote	Duplodnaviria	Heunggongvirae	Uroviricota	Caudoviricetes
SM1000_MG_virome_scaffold_1371_c1	SM1000_MG_virome_scaffold_1371_c1,SM1026_MG_virome_scaffold_180_c1	MG_virome	yes	34133	No	56	13	0	Low-quality	Genome-fragment	46.69	HMM-based (lower-bound)	1		11	0.9737	2	33.7488	Viruses;Duplodnaviria;Heunggongvirae;Uroviricota;Caudoviricetes	dsDNA	Prokaryote	Duplodnaviria	Heunggongvirae	Uroviricota	Caudoviricetes
SM1000_MG_virome_scaffold_1373_c1	SM1000_MG_virome_scaffold_1373_c1	MG_virome	yes	34114	No	43	8	0	Medium-quality	Genome-fragment	57.3	AAI-based (medium-confidence)	1		11	0.9695	0	26.5448	Viruses;Duplodnaviria;Heunggongvirae;Uroviricota;Caudoviricetes	dsDNA	Prokaryote	Duplodnaviria	Heunggongvirae	Uroviricota	Caudoviricetes
SM1000_MG_virome_scaffold_1374_c1	SM1000_MG_virome_scaffold_1374_c1	MG_virome	yes	34057	No	31	4	1	Low-quality	Genome-fragment	7.63	HMM-based (lower-bound)	1.02		11	0.9398	1	11.976	Viruses;Duplodnaviria;Heunggongvirae;Uroviricota;Caudoviricetes	dsDNA	Prokaryote	Duplodnaviria	Heunggongvirae	Uroviricota	Caudoviricetes
SM1000_MG_virome_scaffold_1375_c1	SM1000_MG_virome_scaffold_1375_c1	MG_virome	yes	34037	No	54	5	0	Low-quality	Genome-fragment	20.65	HMM-based (lower-bound)	1		11	0.9783	1	16.0621	Viruses;Duplodnaviria;Heunggongvirae;Uroviricota;Caudoviricetes	dsDNA	Prokaryote	Duplodnaviria	Heunggongvirae	Uroviricota	Caudoviricetes
SM1000_MG_virome_scaffold_1376_c1	SM1000_MG_virome_scaffold_1376_c1	MG_virome	yes	25608	No	29	4	0	Medium-quality	Genome-fragment	56.43	AAI-based (high-confidence)	1		11	0.9826	4	33.1321	Viruses;Duplodnaviria;Heunggongvirae;Uroviricota;Caudoviricetes	dsDNA	Prokaryote	Duplodnaviria	Heunggongvirae	Uroviricota	Caudoviricetes
SM1000_MG_virome_scaffold_1377_c1	SM1000_MG_virome_scaffold_1377_c1	MG_virome	yes	22897	No	27	9	0	Medium-quality	Genome-fragment	64.74	AAI-based (medium-confidence)	1		11	0.98	5	21.3628	Viruses;Duplodnaviria;Heunggongvirae;Uroviricota;Caudoviricetes	dsDNA	Prokaryote	Duplodnaviria	Heunggongvirae	Uroviricota	Caudoviricetes
SM1000_MG_virome_scaffold_1377_c2	SM1000_MG_virome_scaffold_1377_c2	MG_virome	yes	11109	No	9	6	0	Low-quality	Genome-fragment	11.04	HMM-based (lower-bound)	1		11	0.9812	4	10.6221	Viruses;Duplodnaviria;Heunggongvirae;Uroviricota;Caudoviricetes	dsDNA	Prokaryote	Duplodnaviria	Heunggongvirae	Uroviricota	Caudoviricetes
SM1000_MG_virome_scaffold_1378_c1	SM1000_MG_virome_scaffold_1378_c1	MG_virome	yes	33998	No	55	10	0	Low-quality	Genome-fragment	49.18	HMM-based (lower-bound)	1		11	0.9774	11	29.8859	Viruses;Duplodnaviria;Heunggongvirae;Uroviricota;Caudoviricetes	dsDNA	Prokaryote	Duplodnaviria	Heunggongvirae	Uroviricota	Caudoviricetes
SM1000_MG_virome_scaffold_1379_c1	SM1000_MG_virome_scaffold_1379_c1	MG_virome	yes	24801	No	21	3	0	Low-quality	Genome-fragment	27.53	HMM-based (lower-bound)	1		11	0.9803	3	9.2152	Viruses;Duplodnaviria;Heunggongvirae;Uroviricota;Caudoviricetes	dsDNA	Prokaryote	Duplodnaviria	Heunggongvirae	Uroviricota	Caudoviricetes
SM1000_MG_virome_scaffold_138_c1	SM1000_MG_virome_scaffold_138_c1	MG_virome	yes	86625	No	199	9	7	Low-quality	Genome-fragment	41.51	HMM-based (lower-bound)	1		11	0.9634	0	33.6954	Viruses;Duplodnaviria;Heunggongvirae;Uroviricota;Caudoviricetes	dsDNA	Prokaryote	Duplodnaviria	Heunggongvirae	Uroviricota	Caudoviricetes
SM1000_MG_virome_scaffold_1380_c1	SM1000_MG_virome_scaffold_1380_c1	MG_virome	yes	33919	No	62	17	0	Medium-quality	Genome-fragment	58.31	AAI-based (medium-confidence)	1		11	0.9784	11	50.9768	Viruses;Duplodnaviria;Heunggongvirae;Uroviricota;Caudoviricetes	dsDNA	Prokaryote	Duplodnaviria	Heunggongvirae	Uroviricota	Caudoviricetes
SM1000_MG_virome_scaffold_1382_c2	SM1000_MG_virome_scaffold_1382_c2	MG_virome	yes	15293	No	16	7	0	Low-quality	Genome-fragment	27.03	AAI-based (medium-confidence)	1		11	0.9681	3	12.1288	Viruses;Duplodnaviria;Heunggongvirae;Uroviricota;Caudoviricetes	dsDNA	Prokaryote	Duplodnaviria	Heunggongvirae	Uroviricota	Caudoviricetes
SM1000_MG_virome_scaffold_1382_c3	SM1000_MG_virome_scaffold_1382_c3	MG_virome	yes	14830	No	28	3	0	Low-quality	Genome-fragment	26.09	AAI-based (medium-confidence)	1		11	0.8789	2	9.4931	Viruses;Duplodnaviria;Heunggongvirae;Uroviricota;Caudoviricetes	dsDNA	Prokaryote	Duplodnaviria	Heunggongvirae	Uroviricota	Caudoviricetes
SM1000_MG_virome_scaffold_1383_c1	SM1000_MG_virome_scaffold_1383_c1	MG_virome	yes	33824	No	30	3	1	Low-quality	Genome-fragment	38.46	HMM-based (lower-bound)	1		15	0.9761	5	12.4615	Viruses;Duplodnaviria;Heunggongvirae;Uroviricota;Caudoviricetes	dsDNA	Prokaryote	Duplodnaviria	Heunggongvirae	Uroviricota	Caudoviricetes
SM1000_MG_virome_scaffold_1385_c1	SM1000_MG_virome_scaffold_1385_c1	MG_virome	yes	33800	No	43	12	0	Medium-quality	Genome-fragment	87.86	AAI-based (medium-confidence)	1		11	0.9612	9	31.6765	Viruses;Duplodnaviria;Heunggongvirae;Uroviricota;Caudoviricetes	dsDNA	Prokaryote	Duplodnaviria	Heunggongvirae	Uroviricota	Caudoviricetes
SM1000_MG_virome_scaffold_1387_c5	SM1000_MG_virome_scaffold_1387_c5	MG_virome	yes	12384	No	21	1	0	Low-quality	Genome-fragment	22.89	AAI-based (high-confidence)	1		11	0.9787	1	11.8462	Viruses;Duplodnaviria;Heunggongvirae;Uroviricota;Caudoviricetes	dsDNA	Prokaryote	Duplodnaviria	Heunggongvirae	Uroviricota	Caudoviricetes
SM1000_MG_virome_scaffold_1388_c1	SM1000_MG_virome_scaffold_1388_c1	MG_virome	yes	33605	No	49	2	1	Medium-quality	Genome-fragment	88.53	AAI-based (medium-confidence)	1		11	0.9675	3	12.9868	Viruses;Duplodnaviria;Heunggongvirae;Uroviricota;Caudoviricetes	dsDNA	Prokaryote	Duplodnaviria	Heunggongvirae	Uroviricota	Caudoviricetes
SM1000_MG_virome_scaffold_1389_c1	SM1000_MG_virome_scaffold_1389_c1	MG_virome	yes	23900	No	25	4	0	Low-quality	Genome-fragment	40.46	AAI-based (medium-confidence)	1		11	0.9797	4	14.9447	Viruses;Duplodnaviria;Heunggongvirae;Uroviricota;Caudoviricetes	dsDNA	Prokaryote	Duplodnaviria	Heunggongvirae	Uroviricota	Caudoviricetes
SM1000_MG_virome_scaffold_139_c1	SM1000_MG_virome_scaffold_139_c1	MG_virome	yes	86468	No	121	17	0	High-quality	High-quality	100	AAI-based (medium-confidence)	1.8		11	0.9787	8	79.2755	Viruses;Duplodnaviria;Heunggongvirae;Uroviricota;Caudoviricetes	dsDNA	Prokaryote	Duplodnaviria	Heunggongvirae	Uroviricota	Caudoviricetes
SM1000_MG_virome_scaffold_1390_c1	SM1000_MG_virome_scaffold_1390_c1	MG_virome	yes	33552	No	50	11	0	High-quality	High-quality	100	AAI-based (medium-confidence)	1.01		11	0.9704	4	30.1756	Viruses;Duplodnaviria;Heunggongvirae;Uroviricota;Caudoviricetes	dsDNA	Prokaryote	Duplodnaviria	Heunggongvirae	Uroviricota	Caudoviricetes
SM1000_MG_virome_scaffold_1391_c1	SM1000_MG_virome_scaffold_1391_c1	MG_virome	yes	33522	No	51	9	0	Complete	High-quality	100	DTR (high-confidence)	1		11	0.8818	4	37.6845	Viruses;Duplodnaviria;Heunggongvirae;Uroviricota;Caudoviricetes	dsDNA	Prokaryote	Duplodnaviria	Heunggongvirae	Uroviricota	Caudoviricetes
SM1000_MG_virome_scaffold_1392_c1	SM1000_MG_virome_scaffold_1392_c1	MG_virome	yes	30870	No	49	9	0	Medium-quality	Genome-fragment	84.72	AAI-based (medium-confidence)	1		11	0.9687	7	20.9809	Viruses;Duplodnaviria;Heunggongvirae;Uroviricota;Caudoviricetes	dsDNA	Prokaryote	Duplodnaviria	Heunggongvirae	Uroviricota	Caudoviricetes
SM1000_MG_virome_scaffold_1393_c1	SM1000_MG_virome_scaffold_1393_c1	MG_virome	yes	33454	No	57	6	0	High-quality	High-quality	100	AAI-based (medium-confidence)	1.03		11	0.9807	3	38.4292	Viruses;Duplodnaviria;Heunggongvirae;Uroviricota;Caudoviricetes	dsDNA	Prokaryote	Duplodnaviria	Heunggongvirae	Uroviricota	Caudoviricetes
SM1000_MG_virome_scaffold_1394_c1	SM1000_MG_virome_scaffold_1394_c1	MG_virome	yes	13844	No	25	5	1	Low-quality	Genome-fragment	24.58	HMM-based (lower-bound)	1		11	0.9709	2	14.9469	Viruses;Duplodnaviria;Heunggongvirae;Uroviricota;Caudoviricetes	dsDNA	Prokaryote	Duplodnaviria	Heunggongvirae	Uroviricota	Caudoviricetes
SM1000_MG_virome_scaffold_1394_c2	SM1000_MG_virome_scaffold_1394_c2	MG_virome	yes	13651	No	14	4	0	Low-quality	Genome-fragment	39.37	AAI-based (medium-confidence)	1		11	0.9752	2	17.1804	Viruses;Duplodnaviria;Heunggongvirae;Uroviricota;Caudoviricetes	dsDNA	Prokaryote	Duplodnaviria	Heunggongvirae	Uroviricota	Caudoviricetes
SM1000_MG_virome_scaffold_1395_c2	SM1000_MG_virome_scaffold_1395_c2	MG_virome	yes	30484	No	58	10	0	Medium-quality	Genome-fragment	51.29	HMM-based (lower-bound)	1.01		11	0.9769	3	41.6173	Viruses;Duplodnaviria;Heunggongvirae;Uroviricota;Caudoviricetes	dsDNA	Prokaryote	Duplodnaviria	Heunggongvirae	Uroviricota	Caudoviricetes
SM1000_MG_virome_scaffold_1397_c1	SM1000_MG_virome_scaffold_1397_c1	MG_virome	yes	33349	No	49	16	0	Low-quality	Genome-fragment	48.55	HMM-based (lower-bound)	1		11	0.9806	5	31.6767	Viruses;Duplodnaviria;Heunggongvirae;Uroviricota;Caudoviricetes	dsDNA	Prokaryote	Duplodnaviria	Heunggongvirae	Uroviricota	Caudoviricetes
SM1000_MG_virome_scaffold_1398_c1	SM1000_MG_virome_scaffold_1398_c1	MG_virome	yes	33274	No	40	7	0	High-quality	High-quality	100	AAI-based (high-confidence)	1		11	0.9776	1	29.1578	Viruses;Duplodnaviria;Heunggongvirae;Uroviricota;Caudoviricetes	dsDNA	Prokaryote	Duplodnaviria	Heunggongvirae	Uroviricota	Caudoviricetes
SM1000_MG_virome_scaffold_1399_c1	SM1000_MG_virome_scaffold_1399_c1	MG_virome	yes	33265	No	59	12	0	Low-quality	Genome-fragment	19.63	AAI-based (medium-confidence)	1		11	0.976	5	32.3473	Viruses;Duplodnaviria;Heunggongvirae;Uroviricota;Caudoviricetes	dsDNA	Prokaryote	Duplodnaviria	Heunggongvirae	Uroviricota	Caudoviricetes
SM1000_MG_virome_scaffold_14_c1	SM1000_MG_virome_scaffold_14_c1	MG_virome	yes	223821	No	349	43	2	High-quality	High-quality	94.6	AAI-based (medium-confidence)	1		11	0.9751	12	193.214	Viruses;Duplodnaviria;Heunggongvirae;Uroviricota;Caudoviricetes	dsDNA	Prokaryote	Duplodnaviria	Heunggongvirae	Uroviricota	Caudoviricetes
SM1000_MG_virome_scaffold_1400_c1	SM1000_MG_virome_scaffold_1400_c1	MG_virome	yes	18849	No	15	3	0	Low-quality	Genome-fragment	16.36	AAI-based (medium-confidence)	1		11	0.9785	3	5.6187	Viruses;Duplodnaviria;Heunggongvirae;Uroviricota;Caudoviricetes	dsDNA	Prokaryote	Duplodnaviria	Heunggongvirae	Uroviricota	Caudoviricetes
SM1000_MG_virome_scaffold_1401_c1	SM1000_MG_virome_scaffold_1401_c1	MG_virome	yes	17697	No	37	3	0	Low-quality	Genome-fragment	20.1	HMM-based (lower-bound)	1		11	0.9703	1	11.9614	Viruses;Duplodnaviria;Heunggongvirae;Uroviricota;Caudoviricetes	dsDNA	Prokaryote	Duplodnaviria	Heunggongvirae	Uroviricota	Caudoviricetes
SM1000_MG_virome_scaffold_1401_c2	SM1000_MG_virome_scaffold_1401_c2	MG_virome	yes	15553	No	23	10	0	Low-quality	Genome-fragment	31.44	AAI-based (medium-confidence)	1		11	0.9424	8	24.6672	Viruses;Duplodnaviria;Heunggongvirae;Uroviricota;Caudoviricetes	dsDNA	Prokaryote	Duplodnaviria	Heunggongvirae	Uroviricota	Caudoviricetes
SM1000_MG_virome_scaffold_1402_c3	SM1000_MG_virome_scaffold_1402_c3	MG_virome	yes	13343	No	12	12	0	Low-quality	Genome-fragment	22.61	AAI-based (medium-confidence)	1		11	0.98	5	18.9011	Viruses;Duplodnaviria;Heunggongvirae;Uroviricota;Caudoviricetes	dsDNA	Prokaryote	Duplodnaviria	Heunggongvirae	Uroviricota	Caudoviricetes
SM1000_MG_virome_scaffold_1403_c1	SM1000_MG_virome_scaffold_1403_c1	MG_virome	yes	33226	No	46	18	1	Medium-quality	Genome-fragment	71.98	AAI-based (medium-confidence)	1		11	0.9788	6	33.9998	Viruses;Duplodnaviria;Heunggongvirae;Uroviricota;Caudoviricetes	dsDNA	Prokaryote	Duplodnaviria	Heunggongvirae	Uroviricota	Caudoviricetes
SM1000_MG_virome_scaffold_1404_c3	SM1000_MG_virome_scaffold_1404_c3	MG_virome	yes	10940	No	13	3	0	Low-quality	Genome-fragment	34.46	AAI-based (medium-confidence)	1		11	0.9797	2	13.4839	Viruses;Duplodnaviria;Heunggongvirae;Uroviricota;Caudoviricetes	dsDNA	Prokaryote	Duplodnaviria	Heunggongvirae	Uroviricota	Caudoviricetes
SM1000_MG_virome_scaffold_1405_c3	SM1000_MG_virome_scaffold_1405_c3	MG_virome	yes	14912	No	17	5	0	Low-quality	Genome-fragment	7.29	HMM-based (lower-bound)	1		11	0.9705	0	16.1319	Viruses;Duplodnaviria;Heunggongvirae;Uroviricota;Caudoviricetes	dsDNA	Prokaryote	Duplodnaviria	Heunggongvirae	Uroviricota	Caudoviricetes
SM1000_MG_virome_scaffold_1406_c4	SM1000_MG_virome_scaffold_1406_c4	MG_virome	yes	10268	No	20	2	0	Low-quality	Genome-fragment	22.34	AAI-based (medium-confidence)	1		11	0.9791	2	15.0425	Viruses;Duplodnaviria;Heunggongvirae;Uroviricota;Caudoviricetes	dsDNA	Prokaryote	Duplodnaviria	Heunggongvirae	Uroviricota	Caudoviricetes
SM1000_MG_virome_scaffold_1407_c1	SM1000_MG_virome_scaffold_1407_c1	MG_virome	yes	33202	No	48	5	3	Low-quality	Genome-fragment	8.93	AAI-based (medium-confidence)	1.02		11	0.948	0	17.6637	Viruses;Duplodnaviria;Heunggongvirae;Uroviricota;Caudoviricetes	dsDNA	Prokaryote	Duplodnaviria	Heunggongvirae	Uroviricota	Caudoviricetes
SM1000_MG_virome_scaffold_1408_c1	SM1000_MG_virome_scaffold_1408_c1	MG_virome	yes	11095	No	25	1	1	Low-quality	Genome-fragment	15.58	HMM-based (lower-bound)	1		11	0.9766	0	4.7144	Viruses;Duplodnaviria;Heunggongvirae;Uroviricota;Caudoviricetes	dsDNA	Prokaryote	Duplodnaviria	Heunggongvirae	Uroviricota	Caudoviricetes
SM1000_MG_virome_scaffold_1408_c2	SM1000_MG_virome_scaffold_1408_c2	MG_virome	yes	10450	No	32	2	0	Low-quality	Genome-fragment	10.01	HMM-based (lower-bound)	1		11	0.9751	1	7.5805	Viruses;Duplodnaviria;Heunggongvirae;Uroviricota;Caudoviricetes	dsDNA	Prokaryote	Duplodnaviria	Heunggongvirae	Uroviricota	Caudoviricetes
SM1000_MG_virome_scaffold_1409_c1	SM1000_MG_virome_scaffold_1409_c1,SM1050_MG_virome_scaffold_1375_c1,SM1031_MG_virome_scaffold_2028_c1,SM1029_MG_virome_scaffold_539_c1,SM1031_MG_virome_scaffold_2963_c1,SM1004_MG_virome_scaffold_1279_c1,SM1028_MG_virome_scaffold_613_c2,SM1005_MG_virome_scaffold_4080_c1	MG_virome	yes	33191	No	66	9	0	Low-quality	Genome-fragment	46.71	HMM-based (lower-bound)	1		11	0.9651	6	24.8893	Viruses;Duplodnaviria;Heunggongvirae;Uroviricota;Caudoviricetes	dsDNA	Prokaryote	Duplodnaviria	Heunggongvirae	Uroviricota	Caudoviricetes
SM1000_MG_virome_scaffold_141_c1	SM1000_MG_virome_scaffold_141_c1	MG_virome	yes	86139	No	143	37	4	High-quality	High-quality	100	AAI-based (medium-confidence)	1		11	0.9781	8	70.6257	Viruses;Duplodnaviria;Heunggongvirae;Uroviricota;Caudoviricetes	dsDNA	Prokaryote	Duplodnaviria	Heunggongvirae	Uroviricota	Caudoviricetes
SM1000_MG_virome_scaffold_1410_c1	SM1000_MG_virome_scaffold_1410_c1	MG_virome	yes	33190	No	40	5	0	Medium-quality	Genome-fragment	73.16	AAI-based (medium-confidence)	1		11	0.9715	4	23.4654	Viruses;Duplodnaviria;Heunggongvirae;Uroviricota;Caudoviricetes	dsDNA	Prokaryote	Duplodnaviria	Heunggongvirae	Uroviricota	Caudoviricetes
SM1000_MG_virome_scaffold_1411_c1	SM1000_MG_virome_scaffold_1411_c1	MG_virome	yes	11001	No	13	2	0	Low-quality	Genome-fragment	4.58	HMM-based (lower-bound)	1		11	0.9782	2	16.6528	Viruses;Duplodnaviria;Heunggongvirae;Uroviricota;Caudoviricetes	dsDNA	Prokaryote	Duplodnaviria	Heunggongvirae	Uroviricota	Caudoviricetes
SM1000_MG_virome_scaffold_1411_c3	SM1000_MG_virome_scaffold_1411_c3	MG_virome	yes	15012	No	26	3	0	Low-quality	Genome-fragment	40.15	AAI-based (medium-confidence)	1		11	0.974	6	15.5978	Viruses;Duplodnaviria;Heunggongvirae;Uroviricota;Caudoviricetes	dsDNA	Prokaryote	Duplodnaviria	Heunggongvirae	Uroviricota	Caudoviricetes
SM1000_MG_virome_scaffold_1413_c1	SM1000_MG_virome_scaffold_1413_c1	MG_virome	yes	33122	No	48	6	1	Medium-quality	Genome-fragment	53.68	HMM-based (lower-bound)	1		11	0.9749	2	15.6616	Viruses;Duplodnaviria;Heunggongvirae;Uroviricota;Caudoviricetes	dsDNA	Prokaryote	Duplodnaviria	Heunggongvirae	Uroviricota	Caudoviricetes
SM1000_MG_virome_scaffold_1415_c1	SM1000_MG_virome_scaffold_1415_c1	MG_virome	yes	33109	No	65	10	2	Low-quality	Genome-fragment	48.67	HMM-based (lower-bound)	1		11	0.9631	4	26.2057	Viruses;Duplodnaviria;Heunggongvirae;Uroviricota;Caudoviricetes	dsDNA	Prokaryote	Duplodnaviria	Heunggongvirae	Uroviricota	Caudoviricetes
SM1000_MG_virome_scaffold_1416_c1	SM1000_MG_virome_scaffold_1416_c1	MG_virome	yes	33107	No	51	19	1	High-quality	High-quality	93.15	AAI-based (high-confidence)	1		11	0.9797	5	46.1425	Viruses;Duplodnaviria;Heunggongvirae;Uroviricota;Caudoviricetes	dsDNA	Prokaryote	Duplodnaviria	Heunggongvirae	Uroviricota	Caudoviricetes
SM1000_MG_virome_scaffold_1418_c2	SM1000_MG_virome_scaffold_1418_c2	MG_virome	yes	12441	No	13	2	0	Low-quality	Genome-fragment	8.41	AAI-based (medium-confidence)	1		11	0.9826	0	18.8571	Viruses;Duplodnaviria;Heunggongvirae;Uroviricota;Caudoviricetes	dsDNA	Prokaryote	Duplodnaviria	Heunggongvirae	Uroviricota	Caudoviricetes
SM1000_MG_virome_scaffold_1419_c1	SM1000_MG_virome_scaffold_1419_c1	MG_virome	yes	33066	No	43	4	1	Medium-quality	Genome-fragment	77.43	AAI-based (medium-confidence)	1		11	0.9734	3	27.3727	Viruses;Duplodnaviria;Heunggongvirae;Uroviricota;Caudoviricetes	dsDNA	Prokaryote	Duplodnaviria	Heunggongvirae	Uroviricota	Caudoviricetes
SM1000_MG_virome_scaffold_142_c1	SM1000_MG_virome_scaffold_142_c1	MG_virome	yes	85985	No	143	8	4	High-quality	High-quality	100	AAI-based (medium-confidence)	1		11	0.975	4	31.9198	Viruses;Duplodnaviria;Heunggongvirae;Uroviricota;Caudoviricetes	dsDNA	Prokaryote	Duplodnaviria	Heunggongvirae	Uroviricota	Caudoviricetes
SM1000_MG_virome_scaffold_1420_c1	SM1000_MG_virome_scaffold_1420_c1	MG_virome	yes	33056	No	47	21	0	Medium-quality	Genome-fragment	56.37	AAI-based (medium-confidence)	1		11	0.9812	7	40.077	Viruses;Duplodnaviria;Heunggongvirae;Uroviricota;Caudoviricetes	dsDNA	Prokaryote	Duplodnaviria	Heunggongvirae	Uroviricota	Caudoviricetes
SM1000_MG_virome_scaffold_1421_c1	SM1000_MG_virome_scaffold_1421_c1	MG_virome	yes	33030	No	55	5	0	Medium-quality	Genome-fragment	78.98	AAI-based (medium-confidence)	1		11	0.9725	2	21.5111	Viruses;Duplodnaviria;Heunggongvirae;Uroviricota;Caudoviricetes	dsDNA	Prokaryote	Duplodnaviria	Heunggongvirae	Uroviricota	Caudoviricetes
SM1000_MG_virome_scaffold_1422_c1	SM1000_MG_virome_scaffold_1422_c1	MG_virome	yes	33017	No	55	17	1	High-quality	High-quality	100	AAI-based (high-confidence)	1		11	0.9731	3	38.5108	Viruses;Duplodnaviria;Heunggongvirae;Uroviricota;Caudoviricetes	dsDNA	Prokaryote	Duplodnaviria	Heunggongvirae	Uroviricota	Caudoviricetes
SM1000_MG_virome_scaffold_1423_c3	SM1000_MG_virome_scaffold_1423_c3	MG_virome	yes	25996	No	67	1	0	Low-quality	Genome-fragment	6.85	HMM-based (lower-bound)	1		11	0.8881	0	4.7793	Viruses;Duplodnaviria;Heunggongvirae;Uroviricota;Caudoviricetes	dsDNA	Prokaryote	Duplodnaviria	Heunggongvirae	Uroviricota	Caudoviricetes
SM1000_MG_virome_scaffold_1424_c4	SM1000_MG_virome_scaffold_1424_c4	MG_virome	yes	18113	No	31	3	1	Low-quality	Genome-fragment	11.51	AAI-based (medium-confidence)	1		11	0.9771	1	13.2882	Viruses;Duplodnaviria;Heunggongvirae;Uroviricota;Caudoviricetes	dsDNA	Prokaryote	Duplodnaviria	Heunggongvirae	Uroviricota	Caudoviricetes
SM1000_MG_virome_scaffold_1425_c1	SM1000_MG_virome_scaffold_1425_c1	MG_virome	yes	33007	No	57	6	0	Low-quality	Genome-fragment	47.8	HMM-based (lower-bound)	1		11	0.9566	2	11.1533	Viruses;Duplodnaviria;Heunggongvirae;Uroviricota;Caudoviricetes	dsDNA	Prokaryote	Duplodnaviria	Heunggongvirae	Uroviricota	Caudoviricetes
SM1000_MG_virome_scaffold_1426_c1	SM1000_MG_virome_scaffold_1426_c1	MG_virome	yes	32986	No	51	27	0	Medium-quality	Genome-fragment	63.54	AAI-based (medium-confidence)	1		11	0.9818	11	62.2479	Viruses;Duplodnaviria;Heunggongvirae;Uroviricota;Caudoviricetes	dsDNA	Prokaryote	Duplodnaviria	Heunggongvirae	Uroviricota	Caudoviricetes
SM1000_MG_virome_scaffold_1427_c1	SM1000_MG_virome_scaffold_1427_c1	MG_virome	yes	32982	No	42	17	1	Low-quality	Genome-fragment	49.24	HMM-based (lower-bound)	1		11	0.9627	14	32.2071	Viruses;Duplodnaviria;Heunggongvirae;Uroviricota;Caudoviricetes	dsDNA	Prokaryote	Duplodnaviria	Heunggongvirae	Uroviricota	Caudoviricetes
SM1000_MG_virome_scaffold_1428_c1	SM1000_MG_virome_scaffold_1428_c1	MG_virome	yes	32980	No	43	9	1	Medium-quality	Genome-fragment	60.56	AAI-based (medium-confidence)	1		11	0.9792	4	27.9407	Viruses;Duplodnaviria;Heunggongvirae;Uroviricota;Caudoviricetes	dsDNA	Prokaryote	Duplodnaviria	Heunggongvirae	Uroviricota	Caudoviricetes
SM1000_MG_virome_scaffold_1429_c1	SM1000_MG_virome_scaffold_1429_c1	MG_virome	yes	32954	No	61	12	0	Medium-quality	Genome-fragment	86.08	AAI-based (medium-confidence)	1		11	0.9491	7	36.1046	Viruses;Duplodnaviria;Heunggongvirae;Uroviricota;Caudoviricetes	dsDNA	Prokaryote	Duplodnaviria	Heunggongvirae	Uroviricota	Caudoviricetes
SM1000_MG_virome_scaffold_143_c1	SM1000_MG_virome_scaffold_143_c1	MG_virome	yes	26666	No	45	5	0	Low-quality	Genome-fragment	33.25	HMM-based (lower-bound)	1.02		11	0.9598	3	15.906	Viruses;Duplodnaviria;Heunggongvirae;Uroviricota;Caudoviricetes	dsDNA	Prokaryote	Duplodnaviria	Heunggongvirae	Uroviricota	Caudoviricetes
SM1000_MG_virome_scaffold_143_c2	SM1000_MG_virome_scaffold_143_c2	MG_virome	yes	36556	No	53	12	0	Medium-quality	Genome-fragment	77.01	AAI-based (medium-confidence)	1		11	0.9644	3	25.7745	Viruses;Duplodnaviria;Heunggongvirae;Uroviricota;Caudoviricetes	dsDNA	Prokaryote	Duplodnaviria	Heunggongvirae	Uroviricota	Caudoviricetes
SM1000_MG_virome_scaffold_143_c3	SM1000_MG_virome_scaffold_143_c3	MG_virome	yes	22731	No	34	11	0	Low-quality	Genome-fragment	46.59	AAI-based (medium-confidence)	1		11	0.9656	5	22.3632	Viruses;Duplodnaviria;Heunggongvirae;Uroviricota;Caudoviricetes	dsDNA	Prokaryote	Duplodnaviria	Heunggongvirae	Uroviricota	Caudoviricetes
SM1000_MG_virome_scaffold_1430_c1	SM1000_MG_virome_scaffold_1430_c1	MG_virome	yes	32941	No	39	24	1	Medium-quality	Genome-fragment	65.34	AAI-based (medium-confidence)	1.01		11	0.969	10	42.5042	Viruses;Duplodnaviria;Heunggongvirae;Uroviricota;Caudoviricetes	dsDNA	Prokaryote	Duplodnaviria	Heunggongvirae	Uroviricota	Caudoviricetes
SM1000_MG_virome_scaffold_1431_c4	SM1000_MG_virome_scaffold_1431_c4	MG_virome	yes	10708	No	24	4	0	Low-quality	Genome-fragment	13.43	HMM-based (lower-bound)	1		11	0.9625	0	5.2943	Viruses;Duplodnaviria;Heunggongvirae;Uroviricota;Caudoviricetes	dsDNA	Prokaryote	Duplodnaviria	Heunggongvirae	Uroviricota	Caudoviricetes
SM1000_MG_virome_scaffold_1432_c2	SM1000_MG_virome_scaffold_1432_c2	MG_virome	yes	14272	No	24	4	0	Low-quality	Genome-fragment	16.51	HMM-based (lower-bound)	1		11	0.9713	1	5.2828	Viruses;Duplodnaviria;Heunggongvirae;Uroviricota;Caudoviricetes	dsDNA	Prokaryote	Duplodnaviria	Heunggongvirae	Uroviricota	Caudoviricetes
SM1000_MG_virome_scaffold_1433_c1	SM1000_MG_virome_scaffold_1433_c1,SM1005_MG_virome_scaffold_3698_c1	MG_virome	yes	32874	No	55	12	0	Complete	High-quality	100	DTR (high-confidence)	1.01		11	0.9804	4	46.7704	Viruses;Duplodnaviria;Heunggongvirae;Uroviricota;Caudoviricetes	dsDNA	Prokaryote	Duplodnaviria	Heunggongvirae	Uroviricota	Caudoviricetes
SM1000_MG_virome_scaffold_1434_c1	SM1000_MG_virome_scaffold_1434_c1,SM1050_MG_virome_scaffold_538_c2,SM1029_MG_virome_scaffold_566_c2	MG_virome	yes	25692	No	35	4	0	Low-quality	Genome-fragment	46.79	AAI-based (medium-confidence)	1		11	0.9737	1	18.9824	Viruses;Duplodnaviria;Heunggongvirae;Uroviricota;Caudoviricetes	dsDNA	Prokaryote	Duplodnaviria	Heunggongvirae	Uroviricota	Caudoviricetes
SM1000_MG_virome_scaffold_1435_c1	SM1000_MG_virome_scaffold_1435_c1	MG_virome	yes	32794	No	49	8	0	Medium-quality	Genome-fragment	53.9	HMM-based (lower-bound)	1		11	0.9811	5	28.7587	Viruses;Duplodnaviria;Heunggongvirae;Uroviricota;Caudoviricetes	dsDNA	Prokaryote	Duplodnaviria	Heunggongvirae	Uroviricota	Caudoviricetes
SM1000_MG_virome_scaffold_1436_c1	SM1000_MG_virome_scaffold_1436_c1	MG_virome	yes	32777	No	44	7	0	High-quality	High-quality	95.74	AAI-based (medium-confidence)	1		11	0.9587	2	20.1347	Viruses;Duplodnaviria;Heunggongvirae;Uroviricota;Caudoviricetes	dsDNA	Prokaryote	Duplodnaviria	Heunggongvirae	Uroviricota	Caudoviricetes
SM1000_MG_virome_scaffold_1437_c3	SM1000_MG_virome_scaffold_1437_c3	MG_virome	yes	22229	No	36	7	2	Medium-quality	Genome-fragment	51.6	AAI-based (medium-confidence)	1		11	0.9798	6	26.1518	Viruses;Duplodnaviria;Heunggongvirae;Uroviricota;Caudoviricetes	dsDNA	Prokaryote	Duplodnaviria	Heunggongvirae	Uroviricota	Caudoviricetes
SM1000_MG_virome_scaffold_1438_c2	SM1000_MG_virome_scaffold_1438_c2	MG_virome	yes	23822	No	32	9	0	Low-quality	Genome-fragment	38.66	AAI-based (medium-confidence)	1		11	0.9823	0	29.4151	Viruses;Duplodnaviria;Heunggongvirae;Uroviricota;Caudoviricetes	dsDNA	Prokaryote	Duplodnaviria	Heunggongvirae	Uroviricota	Caudoviricetes
SM1000_MG_virome_scaffold_1439_c1	SM1000_MG_virome_scaffold_1439_c1	MG_virome	yes	32682	No	62	16	0	Medium-quality	Genome-fragment	52.72	HMM-based (lower-bound)	1		11	0.9791	6	40.442	Viruses;Duplodnaviria;Heunggongvirae;Uroviricota;Caudoviricetes	dsDNA	Prokaryote	Duplodnaviria	Heunggongvirae	Uroviricota	Caudoviricetes
SM1000_MG_virome_scaffold_144_c3_1|1-26097/40376	SM1000_MG_virome_scaffold_144_c3_1|1-26097/40376	MG_virome	yes	26097	Yes	27	3	0	Low-quality	Genome-fragment	20.33	AAI-based (medium-confidence)	1	1-26097	11	0.7229	3	5.476	Viruses;Duplodnaviria;Heunggongvirae;Uroviricota;Caudoviricetes	dsDNA	Prokaryote	Duplodnaviria	Heunggongvirae	Uroviricota	Caudoviricetes
SM1000_MG_virome_scaffold_144_c4	SM1000_MG_virome_scaffold_144_c4	MG_virome	yes	36915	No	50	6	2	Low-quality	Genome-fragment	32.79	AAI-based (medium-confidence)	1		11	0.7971	1	15.4192	Viruses;Duplodnaviria;Heunggongvirae;Uroviricota;Caudoviricetes	dsDNA	Prokaryote	Duplodnaviria	Heunggongvirae	Uroviricota	Caudoviricetes
SM1000_MG_virome_scaffold_1440_c5	SM1000_MG_virome_scaffold_1440_c5	MG_virome	yes	20391	No	38	3	0	Low-quality	Genome-fragment	21.19	HMM-based (lower-bound)	1		11	0.9716	0	10.7308	Viruses;Duplodnaviria;Heunggongvirae;Uroviricota;Caudoviricetes	dsDNA	Prokaryote	Duplodnaviria	Heunggongvirae	Uroviricota	Caudoviricetes
SM1000_MG_virome_scaffold_1441_c1	SM1000_MG_virome_scaffold_1441_c1	MG_virome	yes	15162	No	38	5	1	Low-quality	Genome-fragment	24.11	HMM-based (lower-bound)	1		11	0.9306	0	19.1365	Viruses;Duplodnaviria;Heunggongvirae;Uroviricota;Caudoviricetes	dsDNA	Prokaryote	Duplodnaviria	Heunggongvirae	Uroviricota	Caudoviricetes
SM1000_MG_virome_scaffold_1441_c4	SM1000_MG_virome_scaffold_1441_c4	MG_virome	yes	12394	No	17	2	0	Low-quality	Genome-fragment	11.02	AAI-based (medium-confidence)	1		11	0.9538	0	9.1593	Viruses;Duplodnaviria;Heunggongvirae;Uroviricota;Caudoviricetes	dsDNA	Prokaryote	Duplodnaviria	Heunggongvirae	Uroviricota	Caudoviricetes
SM1000_MG_virome_scaffold_1442_c2	SM1000_MG_virome_scaffold_1442_c2	MG_virome	yes	28682	No	48	20	0	Low-quality	Genome-fragment	33.16	AAI-based (medium-confidence)	1		11	0.9777	5	32.1072	Viruses;Duplodnaviria;Heunggongvirae;Uroviricota;Caudoviricetes	dsDNA	Prokaryote	Duplodnaviria	Heunggongvirae	Uroviricota	Caudoviricetes
SM1000_MG_virome_scaffold_1443_c1	SM1000_MG_virome_scaffold_1443_c1	MG_virome	yes	32613	No	38	10	1	Low-quality	Genome-fragment	5.89	AAI-based (medium-confidence)	1.01		11	0.956	2	18.2378	Viruses;Varidnaviria;Bamfordvirae;Nucleocytoviricota	dsDNA	Eukaryote	Varidnaviria	Bamfordvirae	Nucleocytoviricota
SM1000_MG_virome_scaffold_1444_c1	SM1000_MG_virome_scaffold_1444_c1	MG_virome	yes	10566	No	20	1	0	Low-quality	Genome-fragment	12.2	HMM-based (lower-bound)	1		11	0.9477	1	2.9178	Viruses;Duplodnaviria;Heunggongvirae;Uroviricota;Caudoviricetes	dsDNA	Prokaryote	Duplodnaviria	Heunggongvirae	Uroviricota	Caudoviricetes
SM1000_MG_virome_scaffold_1445_c1	SM1000_MG_virome_scaffold_1445_c1	MG_virome	yes	17056	No	15	1	0	Low-quality	Genome-fragment	26.02	AAI-based (medium-confidence)	1		11	0.9707	2	7.4151	Viruses;Duplodnaviria;Heunggongvirae;Uroviricota;Caudoviricetes	dsDNA	Prokaryote	Duplodnaviria	Heunggongvirae	Uroviricota	Caudoviricetes
SM1000_MG_virome_scaffold_1447_c1	SM1000_MG_virome_scaffold_1447_c1	MG_virome	yes	32474	No	53	1	0	Low-quality	Genome-fragment	29.08	HMM-based (lower-bound)	1		11	0.9385	0	13.1764	Viruses;Duplodnaviria;Heunggongvirae;Uroviricota;Caudoviricetes	dsDNA	Prokaryote	Duplodnaviria	Heunggongvirae	Uroviricota	Caudoviricetes
SM1000_MG_virome_scaffold_1449_c2	SM1000_MG_virome_scaffold_1449_c2	MG_virome	yes	30534	No	45	4	0	Medium-quality	Genome-fragment	53.76	AAI-based (medium-confidence)	1		11	0.9679	5	25.6779	Viruses;Duplodnaviria;Heunggongvirae;Uroviricota;Caudoviricetes	dsDNA	Prokaryote	Duplodnaviria	Heunggongvirae	Uroviricota	Caudoviricetes
SM1000_MG_virome_scaffold_145_c1	SM1000_MG_virome_scaffold_145_c1	MG_virome	yes	84338	No	141	25	0	Complete	High-quality	100	DTR (high-confidence)	1.05		11	0.9785	14	99.9079	Viruses;Duplodnaviria;Heunggongvirae;Uroviricota;Caudoviricetes	dsDNA	Prokaryote	Duplodnaviria	Heunggongvirae	Uroviricota	Caudoviricetes
SM1000_MG_virome_scaffold_1450_c1	SM1000_MG_virome_scaffold_1450_c1	MG_virome	yes	32335	No	55	14	0	Low-quality	Genome-fragment	45.54	HMM-based (lower-bound)	1.01		11	0.9652	6	23.662	Viruses;Duplodnaviria;Heunggongvirae;Uroviricota;Caudoviricetes	dsDNA	Prokaryote	Duplodnaviria	Heunggongvirae	Uroviricota	Caudoviricetes
SM1000_MG_virome_scaffold_1451_c1	SM1000_MG_virome_scaffold_1451_c1	MG_virome	yes	32310	No	64	12	0	Medium-quality	Genome-fragment	55.66	AAI-based (high-confidence)	1		11	0.9627	4	29.7757	Viruses;Duplodnaviria;Heunggongvirae;Uroviricota;Caudoviricetes	dsDNA	Prokaryote	Duplodnaviria	Heunggongvirae	Uroviricota	Caudoviricetes
SM1000_MG_virome_scaffold_1452_c2	SM1000_MG_virome_scaffold_1452_c2	MG_virome	yes	19606	No	16	4	0	Low-quality	Genome-fragment	25.4	AAI-based (medium-confidence)	1		11	0.9749	0	16.1544	Viruses;Duplodnaviria;Heunggongvirae;Uroviricota;Caudoviricetes	dsDNA	Prokaryote	Duplodnaviria	Heunggongvirae	Uroviricota	Caudoviricetes
SM1000_MG_virome_scaffold_1452_c3	SM1000_MG_virome_scaffold_1452_c3	MG_virome	yes	10943	No	9	2	0	Low-quality	Genome-fragment	12.99	AAI-based (medium-confidence)	1		11	0.9755	0	6.2503	Viruses;Duplodnaviria;Heunggongvirae;Uroviricota;Caudoviricetes;Crassvirales	dsDNA	Prokaryote	Duplodnaviria	Heunggongvirae	Uroviricota	Caudoviricetes	Crassvirales
SM1000_MG_virome_scaffold_1453_c3	SM1000_MG_virome_scaffold_1453_c3	MG_virome	yes	12310	No	25	1	0	Low-quality	Genome-fragment	5.67	HMM-based (lower-bound)	1		11	0.9405	1	4.7835	Viruses;Duplodnaviria;Heunggongvirae;Uroviricota;Caudoviricetes	dsDNA	Prokaryote	Duplodnaviria	Heunggongvirae	Uroviricota	Caudoviricetes
SM1000_MG_virome_scaffold_1455_c1	SM1000_MG_virome_scaffold_1455_c1	MG_virome	yes	32207	No	47	30	0	Medium-quality	Genome-fragment	54.85	AAI-based (medium-confidence)	1		11	0.9796	8	52.5524	Viruses;Duplodnaviria;Heunggongvirae;Uroviricota;Caudoviricetes	dsDNA	Prokaryote	Duplodnaviria	Heunggongvirae	Uroviricota	Caudoviricetes
SM1000_MG_virome_scaffold_1456_c3	SM1000_MG_virome_scaffold_1456_c3	MG_virome	yes	18595	No	24	3	0	Low-quality	Genome-fragment	48.44	AAI-based (high-confidence)	1		11	0.9526	2	5.4412	Viruses;Duplodnaviria;Heunggongvirae;Uroviricota;Caudoviricetes	dsDNA	Prokaryote	Duplodnaviria	Heunggongvirae	Uroviricota	Caudoviricetes
SM1000_MG_virome_scaffold_1457_c1	SM1000_MG_virome_scaffold_1457_c1	MG_virome	yes	32185	No	66	18	0	Low-quality	Genome-fragment	43.65	HMM-based (lower-bound)	1		11	0.9673	10	38.1901	Viruses;Duplodnaviria;Heunggongvirae;Uroviricota;Caudoviricetes	dsDNA	Prokaryote	Duplodnaviria	Heunggongvirae	Uroviricota	Caudoviricetes
SM1000_MG_virome_scaffold_1459_c1	SM1000_MG_virome_scaffold_1459_c1	MG_virome	yes	10176	No	15	1	0	Low-quality	Genome-fragment	3.33	HMM-based (lower-bound)	1		11	0.959	0	5.8547	Viruses;Duplodnaviria;Heunggongvirae;Uroviricota;Caudoviricetes	dsDNA	Prokaryote	Duplodnaviria	Heunggongvirae	Uroviricota	Caudoviricetes
SM1000_MG_virome_scaffold_1459_c4	SM1000_MG_virome_scaffold_1459_c4	MG_virome	yes	14428	No	18	4	0	Low-quality	Genome-fragment	27.65	AAI-based (medium-confidence)	1		11	0.9791	6	17.6032	Viruses;Duplodnaviria;Heunggongvirae;Uroviricota;Caudoviricetes	dsDNA	Prokaryote	Duplodnaviria	Heunggongvirae	Uroviricota	Caudoviricetes
SM1000_MG_virome_scaffold_146_c1	SM1000_MG_virome_scaffold_146_c1	MG_virome	yes	84327	No	150	25	1	High-quality	High-quality	100	AAI-based (medium-confidence)	1		11	0.9704	3	57.2852	Viruses;Duplodnaviria;Heunggongvirae;Uroviricota;Caudoviricetes	dsDNA	Prokaryote	Duplodnaviria	Heunggongvirae	Uroviricota	Caudoviricetes
SM1000_MG_virome_scaffold_1462_c1	SM1000_MG_virome_scaffold_1462_c1	MG_virome	yes	32137	No	52	4	1	Low-quality	Genome-fragment	24.73	HMM-based (lower-bound)	1		11	0.9713	0	20.2942	Viruses;Duplodnaviria;Heunggongvirae;Uroviricota;Caudoviricetes	dsDNA	Prokaryote	Duplodnaviria	Heunggongvirae	Uroviricota	Caudoviricetes
SM1000_MG_virome_scaffold_1463_c1	SM1000_MG_virome_scaffold_1463_c1	MG_virome	yes	10368	No	9	2	0	Low-quality	Genome-fragment	7.01	HMM-based (lower-bound)	1		11	0.9743	1	3.1623	Viruses;Duplodnaviria;Heunggongvirae;Uroviricota;Caudoviricetes	dsDNA	Prokaryote	Duplodnaviria	Heunggongvirae	Uroviricota	Caudoviricetes
SM1000_MG_virome_scaffold_1463_c2	SM1000_MG_virome_scaffold_1463_c2	MG_virome	yes	17804	No	29	3	0	Low-quality	Genome-fragment	20.77	HMM-based (lower-bound)	1		11	0.9575	3	9.6312	Viruses;Duplodnaviria;Heunggongvirae;Uroviricota;Caudoviricetes	dsDNA	Prokaryote	Duplodnaviria	Heunggongvirae	Uroviricota	Caudoviricetes
SM1000_MG_virome_scaffold_1464_c1	SM1000_MG_virome_scaffold_1464_c1	MG_virome	yes	31995	No	44	3	2	Medium-quality	Genome-fragment	60	AAI-based (medium-confidence)	1		11	0.9763	1	20.4131	Viruses;Duplodnaviria;Heunggongvirae;Uroviricota;Caudoviricetes	dsDNA	Prokaryote	Duplodnaviria	Heunggongvirae	Uroviricota	Caudoviricetes
SM1000_MG_virome_scaffold_1466_c3	SM1000_MG_virome_scaffold_1466_c3	MG_virome	yes	12082	No	14	1	0	Low-quality	Genome-fragment	32.86	AAI-based (medium-confidence)	1		11	0.9628	0	5.1321	Viruses;Duplodnaviria;Heunggongvirae;Uroviricota;Caudoviricetes	dsDNA	Prokaryote	Duplodnaviria	Heunggongvirae	Uroviricota	Caudoviricetes
SM1000_MG_virome_scaffold_1467_c1	SM1000_MG_virome_scaffold_1467_c1	MG_virome	yes	31949	No	53	10	0	Low-quality	Genome-fragment	35.09	HMM-based (lower-bound)	1		11	0.9725	7	29.1695	Viruses;Duplodnaviria;Heunggongvirae;Uroviricota;Caudoviricetes	dsDNA	Prokaryote	Duplodnaviria	Heunggongvirae	Uroviricota	Caudoviricetes
SM1000_MG_virome_scaffold_1468_c3	SM1000_MG_virome_scaffold_1468_c3	MG_virome	yes	19420	No	24	5	0	Low-quality	Genome-fragment	12.15	AAI-based (medium-confidence)	1		11	0.9703	1	15.1055	Viruses;Duplodnaviria;Heunggongvirae;Uroviricota;Caudoviricetes	dsDNA	Prokaryote	Duplodnaviria	Heunggongvirae	Uroviricota	Caudoviricetes
SM1000_MG_virome_scaffold_147_c1	SM1000_MG_virome_scaffold_147_c1	MG_virome	yes	74586	No	166	12	2	Medium-quality	Genome-fragment	87.06	AAI-based (medium-confidence)	1		11	0.971	1	46.4245	Viruses;Duplodnaviria;Heunggongvirae;Uroviricota;Caudoviricetes	dsDNA	Prokaryote	Duplodnaviria	Heunggongvirae	Uroviricota	Caudoviricetes
SM1000_MG_virome_scaffold_1472_c1	SM1000_MG_virome_scaffold_1472_c1	MG_virome	yes	28496	No	53	12	0	Medium-quality	Genome-fragment	50.67	AAI-based (medium-confidence)	1		11	0.9757	8	32.8257	Viruses;Duplodnaviria;Heunggongvirae;Uroviricota;Caudoviricetes	dsDNA	Prokaryote	Duplodnaviria	Heunggongvirae	Uroviricota	Caudoviricetes
SM1000_MG_virome_scaffold_1473_c1	SM1000_MG_virome_scaffold_1473_c1	MG_virome	yes	31807	No	57	7	0	Low-quality	Genome-fragment	13.21	HMM-based (lower-bound)	1		11	0.9784	0	18.4523	Viruses;Duplodnaviria;Heunggongvirae;Uroviricota;Caudoviricetes	dsDNA	Prokaryote	Duplodnaviria	Heunggongvirae	Uroviricota	Caudoviricetes
SM1000_MG_virome_scaffold_1474_c1	SM1000_MG_virome_scaffold_1474_c1	MG_virome	yes	31800	No	46	11	0	Complete	High-quality	100	DTR (high-confidence)	1		11	0.9675	4	37.5214	Viruses;Duplodnaviria;Heunggongvirae;Uroviricota;Caudoviricetes	dsDNA	Prokaryote	Duplodnaviria	Heunggongvirae	Uroviricota	Caudoviricetes
SM1000_MG_virome_scaffold_1475_c5	SM1000_MG_virome_scaffold_1475_c5	MG_virome	yes	11894	No	14	3	0	Low-quality	Genome-fragment	12.6	AAI-based (medium-confidence)	1		11	0.9814	3	16.9382	Viruses;Duplodnaviria;Heunggongvirae;Uroviricota;Caudoviricetes	dsDNA	Prokaryote	Duplodnaviria	Heunggongvirae	Uroviricota	Caudoviricetes
SM1000_MG_virome_scaffold_1476_c1	SM1000_MG_virome_scaffold_1476_c1	MG_virome	yes	20659	No	41	9	0	Low-quality	Genome-fragment	32.94	HMM-based (lower-bound)	1.01		11	0.9658	0	25.9039	Viruses;Duplodnaviria;Heunggongvirae;Uroviricota;Caudoviricetes	dsDNA	Prokaryote	Duplodnaviria	Heunggongvirae	Uroviricota	Caudoviricetes
SM1000_MG_virome_scaffold_1477_c1|provirus_18997_31786	SM1000_MG_virome_scaffold_1477_c1|provirus_18997_31786	MG_virome	yes	12790	Yes	20	1	1	Low-quality	Genome-fragment	6.2	HMM-based (lower-bound)	1	18997-31786	11	0.966	3	8.5543	Viruses;Duplodnaviria;Heunggongvirae;Uroviricota;Caudoviricetes	dsDNA	Prokaryote	Duplodnaviria	Heunggongvirae	Uroviricota	Caudoviricetes
SM1000_MG_virome_scaffold_1478_c3	SM1000_MG_virome_scaffold_1478_c3	MG_virome	yes	18485	No	26	10	0	Low-quality	Genome-fragment	41.74	AAI-based (medium-confidence)	1		11	0.9763	4	27.7738	Viruses;Duplodnaviria;Heunggongvirae;Uroviricota;Caudoviricetes	dsDNA	Prokaryote	Duplodnaviria	Heunggongvirae	Uroviricota	Caudoviricetes
SM1000_MG_virome_scaffold_148_c1	SM1000_MG_virome_scaffold_148_c1	MG_virome	yes	15139	No	28	2	0	Low-quality	Genome-fragment	9.5	HMM-based (lower-bound)	1		11	0.9605	0	7.5368	Viruses;Duplodnaviria;Heunggongvirae;Uroviricota;Caudoviricetes	dsDNA	Prokaryote	Duplodnaviria	Heunggongvirae	Uroviricota	Caudoviricetes
SM1000_MG_virome_scaffold_148_c2	SM1000_MG_virome_scaffold_148_c2	MG_virome	yes	67394	No	91	15	2	Medium-quality	Genome-fragment	62.7	AAI-based (medium-confidence)	1		11	0.9283	11	43.1843	Viruses;Duplodnaviria;Heunggongvirae;Uroviricota;Caudoviricetes	dsDNA	Prokaryote	Duplodnaviria	Heunggongvirae	Uroviricota	Caudoviricetes
SM1000_MG_virome_scaffold_1480_c1	SM1000_MG_virome_scaffold_1480_c1	MG_virome	yes	31722	No	49	18	0	Medium-quality	Genome-fragment	51.3	HMM-based (lower-bound)	1.01		11	0.9726	13	33.5327	Viruses;Duplodnaviria;Heunggongvirae;Uroviricota;Caudoviricetes	dsDNA	Prokaryote	Duplodnaviria	Heunggongvirae	Uroviricota	Caudoviricetes
SM1000_MG_virome_scaffold_1481_c1	SM1000_MG_virome_scaffold_1481_c1	MG_virome	yes	31701	No	42	8	0	Complete	High-quality	100	DTR (high-confidence)	1		11	0.9721	3	17.3385	Viruses;Duplodnaviria;Heunggongvirae;Uroviricota;Caudoviricetes	dsDNA	Prokaryote	Duplodnaviria	Heunggongvirae	Uroviricota	Caudoviricetes
SM1000_MG_virome_scaffold_1482_c2	SM1000_MG_virome_scaffold_1482_c2	MG_virome	yes	24180	No	32	12	1	Medium-quality	Genome-fragment	54.66	AAI-based (medium-confidence)	1		11	0.9577	3	24.8233	Viruses;Duplodnaviria;Heunggongvirae;Uroviricota;Caudoviricetes	dsDNA	Prokaryote	Duplodnaviria	Heunggongvirae	Uroviricota	Caudoviricetes
SM1000_MG_virome_scaffold_1483_c1	SM1000_MG_virome_scaffold_1483_c1	MG_virome	yes	31643	No	49	6	1	Medium-quality	Genome-fragment	75.64	AAI-based (medium-confidence)	1		11	0.978	8	37.5006	Viruses;Duplodnaviria;Heunggongvirae;Uroviricota;Caudoviricetes	dsDNA	Prokaryote	Duplodnaviria	Heunggongvirae	Uroviricota	Caudoviricetes
SM1000_MG_virome_scaffold_1484_c3	SM1000_MG_virome_scaffold_1484_c3	MG_virome	yes	10387	No	16	3	0	Low-quality	Genome-fragment	6.55	HMM-based (lower-bound)	1		11	0.9765	0	5.0118	Viruses;Duplodnaviria;Heunggongvirae;Uroviricota;Caudoviricetes	dsDNA	Prokaryote	Duplodnaviria	Heunggongvirae	Uroviricota	Caudoviricetes
SM1000_MG_virome_scaffold_1485_c1	SM1000_MG_virome_scaffold_1485_c1	MG_virome	yes	14995	No	30	5	0	Low-quality	Genome-fragment	18.27	HMM-based (lower-bound)	1		11	0.9699	0	9.1031	Viruses;Duplodnaviria;Heunggongvirae;Uroviricota;Caudoviricetes	dsDNA	Prokaryote	Duplodnaviria	Heunggongvirae	Uroviricota	Caudoviricetes
SM1000_MG_virome_scaffold_1485_c4	SM1000_MG_virome_scaffold_1485_c4	MG_virome	yes	10786	No	14	3	0	Low-quality	Genome-fragment	16.9	AAI-based (medium-confidence)	1		11	0.981	0	10.3279	Viruses;Duplodnaviria;Heunggongvirae;Uroviricota;Caudoviricetes	dsDNA	Prokaryote	Duplodnaviria	Heunggongvirae	Uroviricota	Caudoviricetes
SM1000_MG_virome_scaffold_1486_c4	SM1000_MG_virome_scaffold_1486_c4	MG_virome	yes	21538	No	34	5	0	Medium-quality	Genome-fragment	54.79	AAI-based (medium-confidence)	1		11	0.9774	2	13.6684	Viruses;Duplodnaviria;Heunggongvirae;Uroviricota;Caudoviricetes	dsDNA	Prokaryote	Duplodnaviria	Heunggongvirae	Uroviricota	Caudoviricetes
SM1000_MG_virome_scaffold_1488_c1	SM1000_MG_virome_scaffold_1488_c1	MG_virome	yes	31464	No	42	19	0	Medium-quality	Genome-fragment	83.8	AAI-based (medium-confidence)	1		11	0.9765	7	34.5837	Viruses;Duplodnaviria;Heunggongvirae;Uroviricota;Caudoviricetes	dsDNA	Prokaryote	Duplodnaviria	Heunggongvirae	Uroviricota	Caudoviricetes
SM1000_MG_virome_scaffold_149_c1	SM1000_MG_virome_scaffold_149_c1	MG_virome	yes	83401	No	106	5	2	High-quality	High-quality	100	AAI-based (medium-confidence)	1		11	0.8695	2	22.4331	Viruses;Duplodnaviria;Heunggongvirae;Uroviricota;Caudoviricetes	dsDNA	Prokaryote	Duplodnaviria	Heunggongvirae	Uroviricota	Caudoviricetes
SM1000_MG_virome_scaffold_1490_c1_1|1-14147/24719	SM1000_MG_virome_scaffold_1490_c1_1|1-14147/24719	MG_virome	yes	14147	Yes	21	5	0	Low-quality	Genome-fragment	18.65	HMM-based (lower-bound)	1	1-14147	11	0.9785	2	11.3369	Viruses;Duplodnaviria;Heunggongvirae;Uroviricota;Caudoviricetes	dsDNA	Prokaryote	Duplodnaviria	Heunggongvirae	Uroviricota	Caudoviricetes
SM1000_MG_virome_scaffold_1491_c1	SM1000_MG_virome_scaffold_1491_c1	MG_virome	yes	31369	No	51	15	0	Complete	High-quality	100	DTR (high-confidence)	1		11	0.9797	8	33.9276	Viruses;Duplodnaviria;Heunggongvirae;Uroviricota;Caudoviricetes	dsDNA	Prokaryote	Duplodnaviria	Heunggongvirae	Uroviricota	Caudoviricetes
SM1000_MG_virome_scaffold_1492_c1	SM1000_MG_virome_scaffold_1492_c1	MG_virome	yes	12217	No	29	2	0	Low-quality	Genome-fragment	25.08	AAI-based (high-confidence)	1		11	0.9214	0	6.0399	Viruses;Duplodnaviria;Heunggongvirae;Uroviricota;Caudoviricetes	dsDNA	Prokaryote	Duplodnaviria	Heunggongvirae	Uroviricota	Caudoviricetes
SM1000_MG_virome_scaffold_1492_c3	SM1000_MG_virome_scaffold_1492_c3	MG_virome	yes	16001	No	20	5	0	Low-quality	Genome-fragment	47.45	AAI-based (high-confidence)	1		11	0.9803	3	23.7337	Viruses;Duplodnaviria;Heunggongvirae;Uroviricota;Caudoviricetes	dsDNA	Prokaryote	Duplodnaviria	Heunggongvirae	Uroviricota	Caudoviricetes
SM1000_MG_virome_scaffold_1493_c1	SM1000_MG_virome_scaffold_1493_c1	MG_virome	yes	10922	No	19	3	0	Low-quality	Genome-fragment	8.91	AAI-based (medium-confidence)	1		11	0.9813	1	17.0871	Viruses;Duplodnaviria;Heunggongvirae;Uroviricota;Caudoviricetes	dsDNA	Prokaryote	Duplodnaviria	Heunggongvirae	Uroviricota	Caudoviricetes
SM1000_MG_virome_scaffold_1493_c2	SM1000_MG_virome_scaffold_1493_c2	MG_virome	yes	20413	No	34	9	1	Low-quality	Genome-fragment	15.81	AAI-based (medium-confidence)	1		11	0.98	1	16.3826	Viruses;Duplodnaviria;Heunggongvirae;Uroviricota;Caudoviricetes	dsDNA	Prokaryote	Duplodnaviria	Heunggongvirae	Uroviricota	Caudoviricetes
SM1000_MG_virome_scaffold_1494_c1	SM1000_MG_virome_scaffold_1494_c1	MG_virome	yes	31328	No	43	6	0	Low-quality	Genome-fragment	22.91	HMM-based (lower-bound)	1		11	0.9772	2	20.9709	Viruses;Duplodnaviria;Heunggongvirae;Uroviricota;Caudoviricetes	dsDNA	Prokaryote	Duplodnaviria	Heunggongvirae	Uroviricota	Caudoviricetes
SM1000_MG_virome_scaffold_1495_c2	SM1000_MG_virome_scaffold_1495_c2	MG_virome	yes	15935	No	26	4	1	Low-quality	Genome-fragment	5.6	HMM-based (lower-bound)	1		11	0.9786	2	12.501	Viruses;Duplodnaviria;Heunggongvirae;Uroviricota;Caudoviricetes	dsDNA	Prokaryote	Duplodnaviria	Heunggongvirae	Uroviricota	Caudoviricetes
SM1000_MG_virome_scaffold_1496_c2	SM1000_MG_virome_scaffold_1496_c2	MG_virome	yes	26150	No	40	4	2	Low-quality	Genome-fragment	23.99	HMM-based (lower-bound)	1		11	0.9779	1	17.7323	Viruses;Duplodnaviria;Heunggongvirae;Uroviricota;Caudoviricetes	dsDNA	Prokaryote	Duplodnaviria	Heunggongvirae	Uroviricota	Caudoviricetes
SM1000_MG_virome_scaffold_1497_c1	SM1000_MG_virome_scaffold_1497_c1	MG_virome	yes	21972	No	59	11	0	Low-quality	Genome-fragment	16.67	AAI-based (medium-confidence)	1		11	0.9812	0	25.0715	Viruses;Duplodnaviria;Heunggongvirae;Uroviricota;Caudoviricetes	dsDNA	Prokaryote	Duplodnaviria	Heunggongvirae	Uroviricota	Caudoviricetes
SM1000_MG_virome_scaffold_1498_c1	SM1000_MG_virome_scaffold_1498_c1,SM1031_MG_virome_scaffold_2559_c1	MG_virome	yes	28400	No	39	15	0	Low-quality	Genome-fragment	45.02	AAI-based (medium-confidence)	1		11	0.9803	7	32.456	Viruses;Duplodnaviria;Heunggongvirae;Uroviricota;Caudoviricetes	dsDNA	Prokaryote	Duplodnaviria	Heunggongvirae	Uroviricota	Caudoviricetes
SM1000_MG_virome_scaffold_1499_c1	SM1000_MG_virome_scaffold_1499_c1	MG_virome	yes	31259	No	39	4	0	Medium-quality	Genome-fragment	64.93	AAI-based (medium-confidence)	1		11	0.9709	1	14.6338	Viruses;Duplodnaviria;Heunggongvirae;Uroviricota;Caudoviricetes	dsDNA	Prokaryote	Duplodnaviria	Heunggongvirae	Uroviricota	Caudoviricetes
SM1000_MG_virome_scaffold_15_c1	SM1000_MG_virome_scaffold_15_c1	MG_virome	yes	221098	No	406	44	7	High-quality	High-quality	91.06	HMM-based (lower-bound)	1		11	0.9388	12	193.089	Viruses;Duplodnaviria;Heunggongvirae;Uroviricota;Caudoviricetes	dsDNA	Prokaryote	Duplodnaviria	Heunggongvirae	Uroviricota	Caudoviricetes
SM1000_MG_virome_scaffold_150_c1	SM1000_MG_virome_scaffold_150_c1	MG_virome	yes	82614	No	115	18	0	High-quality	High-quality	96.22	AAI-based (medium-confidence)	1		11	0.9772	6	52.2013	Viruses;Duplodnaviria;Heunggongvirae;Uroviricota;Caudoviricetes	dsDNA	Prokaryote	Duplodnaviria	Heunggongvirae	Uroviricota	Caudoviricetes
SM1000_MG_virome_scaffold_1501_c2	SM1000_MG_virome_scaffold_1501_c2	MG_virome	yes	30318	No	38	10	1	Low-quality	Genome-fragment	5.3	HMM-based (lower-bound)	1.03		11	0.9299	1	13.0938	Viruses;Varidnaviria;Bamfordvirae;Nucleocytoviricota;Megaviricetes	dsDNA	Eukaryote	Varidnaviria	Bamfordvirae	Nucleocytoviricota	Megaviricetes
SM1000_MG_virome_scaffold_1502_c1	SM1000_MG_virome_scaffold_1502_c1	MG_virome	yes	27885	No	40	6	0	Medium-quality	Genome-fragment	66.13	AAI-based (medium-confidence)	1.01		11	0.9804	4	19.3096	Viruses;Duplodnaviria;Heunggongvirae;Uroviricota;Caudoviricetes	dsDNA	Prokaryote	Duplodnaviria	Heunggongvirae	Uroviricota	Caudoviricetes
SM1000_MG_virome_scaffold_1503_c3	SM1000_MG_virome_scaffold_1503_c3	MG_virome	yes	22271	No	31	2	1	Low-quality	Genome-fragment	43.7	AAI-based (medium-confidence)	1		11	0.939	1	17.3059	Viruses;Duplodnaviria;Heunggongvirae;Uroviricota;Caudoviricetes	dsDNA	Prokaryote	Duplodnaviria	Heunggongvirae	Uroviricota	Caudoviricetes
SM1000_MG_virome_scaffold_1504_c1	SM1000_MG_virome_scaffold_1504_c1	MG_virome	yes	31119	No	61	1	1	Low-quality	Genome-fragment	22.05	HMM-based (lower-bound)	1.01		11	0.97	2	17.0618	Viruses;Duplodnaviria;Heunggongvirae;Uroviricota;Caudoviricetes	dsDNA	Prokaryote	Duplodnaviria	Heunggongvirae	Uroviricota	Caudoviricetes
SM1000_MG_virome_scaffold_1505_c1	SM1000_MG_virome_scaffold_1505_c1	MG_virome	yes	29297	No	40	8	1	Low-quality	Genome-fragment	35.57	HMM-based (lower-bound)	1		11	0.975	5	18.7938	Viruses;Duplodnaviria;Heunggongvirae;Uroviricota;Caudoviricetes	dsDNA	Prokaryote	Duplodnaviria	Heunggongvirae	Uroviricota	Caudoviricetes
SM1000_MG_virome_scaffold_1506_c4	SM1000_MG_virome_scaffold_1506_c4	MG_virome	yes	16174	No	35	5	0	Low-quality	Genome-fragment	2.43	HMM-based (lower-bound)	1		11	0.9791	0	10.5689	Viruses;Duplodnaviria;Heunggongvirae;Uroviricota;Caudoviricetes	dsDNA	Prokaryote	Duplodnaviria	Heunggongvirae	Uroviricota	Caudoviricetes
SM1000_MG_virome_scaffold_1507_c1	SM1000_MG_virome_scaffold_1507_c1	MG_virome	yes	10422	No	17	1	0	Low-quality	Genome-fragment	6.95	HMM-based (lower-bound)	1		11	0.9352	0	2.6979	Viruses;Duplodnaviria;Heunggongvirae;Uroviricota;Caudoviricetes	dsDNA	Prokaryote	Duplodnaviria	Heunggongvirae	Uroviricota	Caudoviricetes
SM1000_MG_virome_scaffold_1507_c3	SM1000_MG_virome_scaffold_1507_c3	MG_virome	yes	11658	No	16	2	2	Low-quality	Genome-fragment	6.82	HMM-based (lower-bound)	1		11	0.9681	0	4.6086	Viruses;Duplodnaviria;Heunggongvirae;Uroviricota;Caudoviricetes	dsDNA	Prokaryote	Duplodnaviria	Heunggongvirae	Uroviricota	Caudoviricetes
SM1000_MG_virome_scaffold_151_c1	SM1000_MG_virome_scaffold_151_c1	MG_virome	yes	82340	No	136	7	0	Complete	High-quality	100	DTR (high-confidence)	1		11	0.9067	0	28.9814	Viruses;Duplodnaviria;Heunggongvirae;Uroviricota;Caudoviricetes	dsDNA	Prokaryote	Duplodnaviria	Heunggongvirae	Uroviricota	Caudoviricetes
SM1000_MG_virome_scaffold_1510_c2	SM1000_MG_virome_scaffold_1510_c2	MG_virome	yes	19334	No	33	6	0	Low-quality	Genome-fragment	19.61	HMM-based (lower-bound)	1		11	0.973	4	8.0261	Viruses;Duplodnaviria;Heunggongvirae;Uroviricota;Caudoviricetes	dsDNA	Prokaryote	Duplodnaviria	Heunggongvirae	Uroviricota	Caudoviricetes
SM1000_MG_virome_scaffold_1511_c1	SM1000_MG_virome_scaffold_1511_c1	MG_virome	yes	30936	No	47	13	0	High-quality	High-quality	96.94	AAI-based (high-confidence)	1		11	0.98	8	33.5354	Viruses;Duplodnaviria;Heunggongvirae;Uroviricota;Caudoviricetes	dsDNA	Prokaryote	Duplodnaviria	Heunggongvirae	Uroviricota	Caudoviricetes
SM1000_MG_virome_scaffold_1512_c1	SM1000_MG_virome_scaffold_1512_c1	MG_virome	yes	30935	No	38	12	0	High-quality	High-quality	100	AAI-based (medium-confidence)	1.08		11	0.9806	4	31.3351	Viruses;Duplodnaviria;Heunggongvirae;Uroviricota;Caudoviricetes	dsDNA	Prokaryote	Duplodnaviria	Heunggongvirae	Uroviricota	Caudoviricetes
SM1000_MG_virome_scaffold_1514_c2	SM1000_MG_virome_scaffold_1514_c2	MG_virome	yes	28759	No	29	4	1	Medium-quality	Genome-fragment	54.55	AAI-based (high-confidence)	1		11	0.9592	2	21.2689	Viruses;Duplodnaviria;Heunggongvirae;Uroviricota;Caudoviricetes	dsDNA	Prokaryote	Duplodnaviria	Heunggongvirae	Uroviricota	Caudoviricetes
SM1000_MG_virome_scaffold_1515_c3	SM1000_MG_virome_scaffold_1515_c3	MG_virome	yes	13960	No	16	2	0	Low-quality	Genome-fragment	23.7	AAI-based (medium-confidence)	1		11	0.9672	1	12.6543	Viruses;Duplodnaviria;Heunggongvirae;Uroviricota;Caudoviricetes	dsDNA	Prokaryote	Duplodnaviria	Heunggongvirae	Uroviricota	Caudoviricetes
SM1000_MG_virome_scaffold_1516_c1	SM1000_MG_virome_scaffold_1516_c1	MG_virome	yes	30810	No	66	6	0	Low-quality	Genome-fragment	15.87	AAI-based (medium-confidence)	1		11	0.9795	2	13.4837	Viruses;Duplodnaviria;Heunggongvirae;Uroviricota;Caudoviricetes	dsDNA	Prokaryote	Duplodnaviria	Heunggongvirae	Uroviricota	Caudoviricetes
SM1000_MG_virome_scaffold_1518_c1	SM1000_MG_virome_scaffold_1518_c1	MG_virome	yes	30779	No	33	5	0	Medium-quality	Genome-fragment	51.4	AAI-based (medium-confidence)	1		11	0.9636	0	25.4956	Viruses;Duplodnaviria;Heunggongvirae;Uroviricota;Caudoviricetes	dsDNA	Prokaryote	Duplodnaviria	Heunggongvirae	Uroviricota	Caudoviricetes
SM1000_MG_virome_scaffold_152_c1	SM1000_MG_virome_scaffold_152_c1	MG_virome	yes	82335	No	136	30	4	Low-quality	Genome-fragment	26.6	AAI-based (medium-confidence)	1		11	0.9106	12	82.8541	Viruses;Duplodnaviria;Heunggongvirae;Uroviricota;Caudoviricetes	dsDNA	Prokaryote	Duplodnaviria	Heunggongvirae	Uroviricota	Caudoviricetes
SM1000_MG_virome_scaffold_1520_c1	SM1000_MG_virome_scaffold_1520_c1	MG_virome	yes	30749	No	41	5	0	Low-quality	Genome-fragment	33.07	AAI-based (medium-confidence)	1		11	0.9726	3	23.0586	Viruses;Duplodnaviria;Heunggongvirae;Uroviricota;Caudoviricetes	dsDNA	Prokaryote	Duplodnaviria	Heunggongvirae	Uroviricota	Caudoviricetes
SM1000_MG_virome_scaffold_1521_c1	SM1000_MG_virome_scaffold_1521_c1	MG_virome	yes	30394	No	73	2	0	Low-quality	Genome-fragment	18.4	HMM-based (lower-bound)	1		11	0.9331	0	5.7606	Viruses;Duplodnaviria;Heunggongvirae;Uroviricota;Caudoviricetes	dsDNA	Prokaryote	Duplodnaviria	Heunggongvirae	Uroviricota	Caudoviricetes
SM1000_MG_virome_scaffold_1522_c1	SM1000_MG_virome_scaffold_1522_c1	MG_virome	yes	30715	No	74	2	2	Low-quality	Genome-fragment	11.8	HMM-based (lower-bound)	1		11	0.9184	0	10.9651	Viruses;Duplodnaviria;Heunggongvirae;Uroviricota;Caudoviricetes	dsDNA	Prokaryote	Duplodnaviria	Heunggongvirae	Uroviricota	Caudoviricetes
SM1000_MG_virome_scaffold_1523_c1	SM1000_MG_virome_scaffold_1523_c1	MG_virome	yes	30685	No	30	7	1	Low-quality	Genome-fragment	40.21	HMM-based (lower-bound)	1		11	0.9657	4	11.5098	Viruses;Duplodnaviria;Heunggongvirae;Uroviricota;Caudoviricetes	dsDNA	Prokaryote	Duplodnaviria	Heunggongvirae	Uroviricota	Caudoviricetes
SM1000_MG_virome_scaffold_1524_c1	SM1000_MG_virome_scaffold_1524_c1	MG_virome	yes	30665	No	40	36	0	Low-quality	Genome-fragment	32.05	AAI-based (high-confidence)	1		11	0.9837	10	61.9154	Viruses;Duplodnaviria;Heunggongvirae;Uroviricota;Caudoviricetes	dsDNA	Prokaryote	Duplodnaviria	Heunggongvirae	Uroviricota	Caudoviricetes
SM1000_MG_virome_scaffold_1525_c4	SM1000_MG_virome_scaffold_1525_c4	MG_virome	yes	22066	No	57	2	1	Low-quality	Genome-fragment	14.56	HMM-based (lower-bound)	1		11	0.9589	0	17.0534	Viruses;Duplodnaviria;Heunggongvirae;Uroviricota;Caudoviricetes	dsDNA	Prokaryote	Duplodnaviria	Heunggongvirae	Uroviricota	Caudoviricetes
SM1000_MG_virome_scaffold_1526_c1	SM1000_MG_virome_scaffold_1526_c1	MG_virome	yes	30595	No	56	8	0	Low-quality	Genome-fragment	29.89	HMM-based (lower-bound)	1		11	0.9785	2	28.4481	Viruses;Duplodnaviria;Heunggongvirae;Uroviricota;Caudoviricetes	dsDNA	Prokaryote	Duplodnaviria	Heunggongvirae	Uroviricota	Caudoviricetes
SM1000_MG_virome_scaffold_1527_c7	SM1000_MG_virome_scaffold_1527_c7	MG_virome	yes	17190	No	15	2	0	Low-quality	Genome-fragment	10.4	HMM-based (lower-bound)	1		11	0.9816	0	23.6376	Viruses;Duplodnaviria;Heunggongvirae;Uroviricota;Caudoviricetes	dsDNA	Prokaryote	Duplodnaviria	Heunggongvirae	Uroviricota	Caudoviricetes
SM1000_MG_virome_scaffold_1528_c1	SM1000_MG_virome_scaffold_1528_c1	MG_virome	yes	14402	No	12	3	0	Low-quality	Genome-fragment	24.5	HMM-based (lower-bound)	1		11	0.9786	1	12.0157	Viruses;Duplodnaviria;Heunggongvirae;Uroviricota;Caudoviricetes	dsDNA	Prokaryote	Duplodnaviria	Heunggongvirae	Uroviricota	Caudoviricetes
SM1000_MG_virome_scaffold_1529_c2	SM1000_MG_virome_scaffold_1529_c2	MG_virome	yes	20538	No	23	2	0	Low-quality	Genome-fragment	32.65	HMM-based (lower-bound)	1		11	0.9788	4	18.2858	Viruses;Duplodnaviria;Heunggongvirae;Uroviricota;Caudoviricetes	dsDNA	Prokaryote	Duplodnaviria	Heunggongvirae	Uroviricota	Caudoviricetes
SM1000_MG_virome_scaffold_153_c3	SM1000_MG_virome_scaffold_153_c3	MG_virome	yes	20560	No	39	4	0	Low-quality	Genome-fragment	28.96	AAI-based (medium-confidence)	1		11	0.9738	1	10.8506	Viruses;Duplodnaviria;Heunggongvirae;Uroviricota;Caudoviricetes	dsDNA	Prokaryote	Duplodnaviria	Heunggongvirae	Uroviricota	Caudoviricetes
SM1000_MG_virome_scaffold_1530_c1	SM1000_MG_virome_scaffold_1530_c1	MG_virome	yes	30458	No	45	15	0	Medium-quality	Genome-fragment	81.58	AAI-based (high-confidence)	1		11	0.9801	3	48.2511	Viruses;Duplodnaviria;Heunggongvirae;Uroviricota;Caudoviricetes	dsDNA	Prokaryote	Duplodnaviria	Heunggongvirae	Uroviricota	Caudoviricetes
SM1000_MG_virome_scaffold_1531_c4	SM1000_MG_virome_scaffold_1531_c4	MG_virome	yes	10384	No	11	2	0	Low-quality	Genome-fragment	27.02	AAI-based (medium-confidence)	1		11	0.9259	2	6.3273	Viruses;Duplodnaviria;Heunggongvirae;Uroviricota;Caudoviricetes	dsDNA	Prokaryote	Duplodnaviria	Heunggongvirae	Uroviricota	Caudoviricetes
SM1000_MG_virome_scaffold_1532_c2	SM1000_MG_virome_scaffold_1532_c2	MG_virome	yes	25713	No	24	12	0	Medium-quality	Genome-fragment	55.77	AAI-based (medium-confidence)	1		11	0.9831	3	29.2044	Viruses;Duplodnaviria;Heunggongvirae;Uroviricota;Caudoviricetes;Zobellviridae	dsDNA	Prokaryote	Duplodnaviria	Heunggongvirae	Uroviricota	Caudoviricetes		Zobellviridae
SM1000_MG_virome_scaffold_1536_c1	SM1000_MG_virome_scaffold_1536_c1	MG_virome	yes	30308	No	49	9	0	Low-quality	Genome-fragment	49.91	AAI-based (medium-confidence)	1		11	0.9634	5	27.5543	Viruses;Duplodnaviria;Heunggongvirae;Uroviricota;Caudoviricetes	dsDNA	Prokaryote	Duplodnaviria	Heunggongvirae	Uroviricota	Caudoviricetes
SM1000_MG_virome_scaffold_1537_c1	SM1000_MG_virome_scaffold_1537_c1	MG_virome	yes	18428	No	38	7	0	Low-quality	Genome-fragment	27.06	HMM-based (lower-bound)	1		11	0.9713	4	12.7644	Viruses;Duplodnaviria;Heunggongvirae;Uroviricota;Caudoviricetes	dsDNA	Prokaryote	Duplodnaviria	Heunggongvirae	Uroviricota	Caudoviricetes
SM1000_MG_virome_scaffold_1537_c2	SM1000_MG_virome_scaffold_1537_c2	MG_virome	yes	11848	No	39	4	0	Low-quality	Genome-fragment	9.94	HMM-based (lower-bound)	1		11	0.9712	0	7.953	Viruses;Duplodnaviria;Heunggongvirae;Uroviricota;Caudoviricetes	dsDNA	Prokaryote	Duplodnaviria	Heunggongvirae	Uroviricota	Caudoviricetes
SM1000_MG_virome_scaffold_1538_c1	SM1000_MG_virome_scaffold_1538_c1	MG_virome	yes	17123	No	17	4	0	Low-quality	Genome-fragment	24.35	AAI-based (medium-confidence)	1		11	0.9433	2	6.9323	Viruses;Duplodnaviria;Heunggongvirae;Uroviricota;Caudoviricetes	dsDNA	Prokaryote	Duplodnaviria	Heunggongvirae	Uroviricota	Caudoviricetes
SM1000_MG_virome_scaffold_1538_c2	SM1000_MG_virome_scaffold_1538_c2	MG_virome	yes	13133	No	23	2	1	Low-quality	Genome-fragment	15.32	HMM-based (lower-bound)	1		11	0.9529	2	5.3511	Viruses;Duplodnaviria;Heunggongvirae;Uroviricota;Caudoviricetes	dsDNA	Prokaryote	Duplodnaviria	Heunggongvirae	Uroviricota	Caudoviricetes
SM1000_MG_virome_scaffold_1539_c2	SM1000_MG_virome_scaffold_1539_c2	MG_virome	yes	22212	No	48	10	0	Low-quality	Genome-fragment	41.71	AAI-based (medium-confidence)	1		11	0.9773	2	10.9304	Viruses;Duplodnaviria;Heunggongvirae;Uroviricota;Caudoviricetes	dsDNA	Prokaryote	Duplodnaviria	Heunggongvirae	Uroviricota	Caudoviricetes
SM1000_MG_virome_scaffold_154_c1	SM1000_MG_virome_scaffold_154_c1	MG_virome	yes	82245	No	138	14	4	Low-quality	Genome-fragment	47.26	AAI-based (high-confidence)	1		11	0.9722	2	47.5183	Viruses;Duplodnaviria;Heunggongvirae;Uroviricota;Caudoviricetes	dsDNA	Prokaryote	Duplodnaviria	Heunggongvirae	Uroviricota	Caudoviricetes
SM1000_MG_virome_scaffold_1540_c1	SM1000_MG_virome_scaffold_1540_c1	MG_virome	yes	30215	No	26	10	0	Medium-quality	Genome-fragment	51.29	AAI-based (medium-confidence)	1		11	0.9754	4	21.4561	Viruses;Duplodnaviria;Heunggongvirae;Uroviricota;Caudoviricetes	dsDNA	Prokaryote	Duplodnaviria	Heunggongvirae	Uroviricota	Caudoviricetes
SM1000_MG_virome_scaffold_1541_c1	SM1000_MG_virome_scaffold_1541_c1	MG_virome	yes	30164	No	38	6	0	Complete	High-quality	100	DTR (high-confidence)	1		11	0.9798	5	39.8737	Viruses;Duplodnaviria;Heunggongvirae;Uroviricota;Caudoviricetes	dsDNA	Prokaryote	Duplodnaviria	Heunggongvirae	Uroviricota	Caudoviricetes
SM1000_MG_virome_scaffold_1542_c1	SM1000_MG_virome_scaffold_1542_c1	MG_virome	yes	23084	No	32	3	1	Low-quality	Genome-fragment	38.61	AAI-based (medium-confidence)	1		11	0.8975	1	4.8001	Viruses;Duplodnaviria;Heunggongvirae;Uroviricota;Caudoviricetes	dsDNA	Prokaryote	Duplodnaviria	Heunggongvirae	Uroviricota	Caudoviricetes
SM1000_MG_virome_scaffold_1543_c1	SM1000_MG_virome_scaffold_1543_c1	MG_virome	yes	30145	No	49	8	0	High-quality	High-quality	100	AAI-based (medium-confidence)	1		11	0.9729	2	16.7248	Viruses;Duplodnaviria;Heunggongvirae;Uroviricota;Caudoviricetes	dsDNA	Prokaryote	Duplodnaviria	Heunggongvirae	Uroviricota	Caudoviricetes
SM1000_MG_virome_scaffold_1544_c1	SM1000_MG_virome_scaffold_1544_c1	MG_virome	yes	30145	No	44	18	0	Medium-quality	Genome-fragment	57.36	AAI-based (medium-confidence)	1		11	0.9819	13	44.5588	Viruses;Duplodnaviria;Heunggongvirae;Uroviricota;Caudoviricetes	dsDNA	Prokaryote	Duplodnaviria	Heunggongvirae	Uroviricota	Caudoviricetes
SM1000_MG_virome_scaffold_1545_c1	SM1000_MG_virome_scaffold_1545_c1	MG_virome	yes	15095	No	18	3	1	Low-quality	Genome-fragment	8.39	AAI-based (medium-confidence)	1		11	0.978	2	20.2621	Viruses;Duplodnaviria;Heunggongvirae;Uroviricota;Caudoviricetes	dsDNA	Prokaryote	Duplodnaviria	Heunggongvirae	Uroviricota	Caudoviricetes
SM1000_MG_virome_scaffold_1545_c4	SM1000_MG_virome_scaffold_1545_c4	MG_virome	yes	13466	No	22	5	0	Low-quality	Genome-fragment	6.82	HMM-based (lower-bound)	1		11	0.9804	0	17.0911	Viruses;Duplodnaviria;Heunggongvirae;Uroviricota;Caudoviricetes	dsDNA	Prokaryote	Duplodnaviria	Heunggongvirae	Uroviricota	Caudoviricetes
SM1000_MG_virome_scaffold_1546_c3	SM1000_MG_virome_scaffold_1546_c3	MG_virome	yes	11629	No	20	3	0	Low-quality	Genome-fragment	12.57	AAI-based (medium-confidence)	1		11	0.9276	1	11.7956	Viruses;Duplodnaviria;Heunggongvirae;Uroviricota;Caudoviricetes	dsDNA	Prokaryote	Duplodnaviria	Heunggongvirae	Uroviricota	Caudoviricetes
SM1000_MG_virome_scaffold_1548_c1	SM1000_MG_virome_scaffold_1548_c1	MG_virome	yes	30105	No	45	4	2	Medium-quality	Genome-fragment	50.79	HMM-based (lower-bound)	1		11	0.9598	4	9.5264	Viruses;Duplodnaviria;Heunggongvirae;Uroviricota;Caudoviricetes	dsDNA	Prokaryote	Duplodnaviria	Heunggongvirae	Uroviricota	Caudoviricetes
SM1000_MG_virome_scaffold_1549_c1	SM1000_MG_virome_scaffold_1549_c1	MG_virome	yes	30078	No	61	11	0	Medium-quality	Genome-fragment	51.74	AAI-based (medium-confidence)	1		11	0.9699	3	24.7642	Viruses;Duplodnaviria;Heunggongvirae;Uroviricota;Caudoviricetes	dsDNA	Prokaryote	Duplodnaviria	Heunggongvirae	Uroviricota	Caudoviricetes
SM1000_MG_virome_scaffold_155_c1	SM1000_MG_virome_scaffold_155_c1,SM1028_MG_virome_scaffold_201_c3	MG_virome	yes	79407	No	111	12	2	High-quality	High-quality	100	AAI-based (high-confidence)	1.01		11	0.9069	6	29.4617	Viruses;Duplodnaviria;Heunggongvirae;Uroviricota;Caudoviricetes	dsDNA	Prokaryote	Duplodnaviria	Heunggongvirae	Uroviricota	Caudoviricetes
SM1000_MG_virome_scaffold_1550_c1	SM1000_MG_virome_scaffold_1550_c1	MG_virome	yes	30049	No	47	15	0	Low-quality	Genome-fragment	36.39	HMM-based (lower-bound)	1		11	0.9696	10	31.5815	Viruses;Duplodnaviria;Heunggongvirae;Uroviricota;Caudoviricetes	dsDNA	Prokaryote	Duplodnaviria	Heunggongvirae	Uroviricota	Caudoviricetes
SM1000_MG_virome_scaffold_1552_c1	SM1000_MG_virome_scaffold_1552_c1	MG_virome	yes	15570	No	13	2	0	Low-quality	Genome-fragment	29.02	AAI-based (high-confidence)	1		11	0.9705	1	8.366	Viruses;Duplodnaviria;Heunggongvirae;Uroviricota;Caudoviricetes	dsDNA	Prokaryote	Duplodnaviria	Heunggongvirae	Uroviricota	Caudoviricetes
SM1000_MG_virome_scaffold_1552_c2	SM1000_MG_virome_scaffold_1552_c2	MG_virome	yes	14438	No	12	6	0	Low-quality	Genome-fragment	20.08	HMM-based (lower-bound)	1		11	0.9812	2	13.8632	Viruses;Duplodnaviria;Heunggongvirae;Uroviricota;Caudoviricetes	dsDNA	Prokaryote	Duplodnaviria	Heunggongvirae	Uroviricota	Caudoviricetes
SM1000_MG_virome_scaffold_1553_c4	SM1000_MG_virome_scaffold_1553_c4	MG_virome	yes	15986	No	36	9	0	Low-quality	Genome-fragment	41.97	AAI-based (medium-confidence)	1		11	0.9674	2	15.8996	Viruses;Duplodnaviria;Heunggongvirae;Uroviricota;Caudoviricetes	dsDNA	Prokaryote	Duplodnaviria	Heunggongvirae	Uroviricota	Caudoviricetes
SM1000_MG_virome_scaffold_1553_c5	SM1000_MG_virome_scaffold_1553_c5	MG_virome	yes	10303	No	11	4	0	Low-quality	Genome-fragment	25.07	AAI-based (medium-confidence)	1		11	0.9807	3	12.8189	Viruses;Duplodnaviria;Heunggongvirae;Uroviricota;Caudoviricetes	dsDNA	Prokaryote	Duplodnaviria	Heunggongvirae	Uroviricota	Caudoviricetes
SM1000_MG_virome_scaffold_1554_c1	SM1000_MG_virome_scaffold_1554_c1	MG_virome	yes	29957	No	52	16	0	Low-quality	Genome-fragment	45.84	HMM-based (lower-bound)	1		11	0.9544	2	29.39	Viruses;Duplodnaviria;Heunggongvirae;Uroviricota;Caudoviricetes	dsDNA	Prokaryote	Duplodnaviria	Heunggongvirae	Uroviricota	Caudoviricetes
SM1000_MG_virome_scaffold_1555_c1	SM1000_MG_virome_scaffold_1555_c1	MG_virome	yes	29925	No	57	3	1	Low-quality	Genome-fragment	31.87	HMM-based (lower-bound)	1		11	0.9777	1	17.0921	Viruses;Duplodnaviria;Heunggongvirae;Uroviricota;Caudoviricetes	dsDNA	Prokaryote	Duplodnaviria	Heunggongvirae	Uroviricota	Caudoviricetes
SM1000_MG_virome_scaffold_1556_c2	SM1000_MG_virome_scaffold_1556_c2	MG_virome	yes	19175	No	25	2	2	Low-quality	Genome-fragment	4.96	HMM-based (lower-bound)	1		11	0.9629	2	10.8719	Viruses;Duplodnaviria;Heunggongvirae;Uroviricota;Caudoviricetes	dsDNA	Prokaryote	Duplodnaviria	Heunggongvirae	Uroviricota	Caudoviricetes
SM1000_MG_virome_scaffold_1557_c4	SM1000_MG_virome_scaffold_1557_c4	MG_virome	yes	19421	No	11	3	1	Low-quality	Genome-fragment	17.92	HMM-based (lower-bound)	1		11	0.977	0	11.0563	Viruses;Duplodnaviria;Heunggongvirae;Uroviricota;Caudoviricetes	dsDNA	Prokaryote	Duplodnaviria	Heunggongvirae	Uroviricota	Caudoviricetes
SM1000_MG_virome_scaffold_1558_c1	SM1000_MG_virome_scaffold_1558_c1	MG_virome	yes	29860	No	49	1	1	Low-quality	Genome-fragment	22.28	HMM-based (lower-bound)	1		11	0.7733	1	5.3528	Viruses;Duplodnaviria;Heunggongvirae;Uroviricota;Caudoviricetes	dsDNA	Prokaryote	Duplodnaviria	Heunggongvirae	Uroviricota	Caudoviricetes
SM1000_MG_virome_scaffold_1559_c1	SM1000_MG_virome_scaffold_1559_c1	MG_virome	yes	22884	No	28	7	1	Low-quality	Genome-fragment	22.29	AAI-based (high-confidence)	1		11	0.9794	3	16.1222	Viruses;Duplodnaviria;Heunggongvirae;Uroviricota;Caudoviricetes	dsDNA	Prokaryote	Duplodnaviria	Heunggongvirae	Uroviricota	Caudoviricetes
SM1000_MG_virome_scaffold_156_c1	SM1000_MG_virome_scaffold_156_c1	MG_virome	yes	82021	No	111	16	2	Complete	High-quality	100	DTR (high-confidence)	1		11	0.9797	11	55.9069	Viruses;Duplodnaviria;Heunggongvirae;Uroviricota;Caudoviricetes	dsDNA	Prokaryote	Duplodnaviria	Heunggongvirae	Uroviricota	Caudoviricetes
SM1000_MG_virome_scaffold_1560_c1	SM1000_MG_virome_scaffold_1560_c1,SM1027_MG_virome_scaffold_409_c1_1|5215-21206/21206,SM1050_MG_virome_scaffold_1281_c2,SM1050_MG_virome_scaffold_1281_c1_1|1-8107/11871	MG_virome	yes	29842	No	38	8	5	Low-quality	Genome-fragment	48.84	AAI-based (medium-confidence)	1		11	0.9654	4	31.6099	Viruses;Duplodnaviria;Heunggongvirae;Uroviricota;Caudoviricetes	dsDNA	Prokaryote	Duplodnaviria	Heunggongvirae	Uroviricota	Caudoviricetes
SM1000_MG_virome_scaffold_1561_c1	SM1000_MG_virome_scaffold_1561_c1	MG_virome	yes	18713	No	32	5	0	Low-quality	Genome-fragment	33.77	AAI-based (medium-confidence)	1		11	0.9772	0	9.9172	Viruses;Duplodnaviria;Heunggongvirae;Uroviricota;Caudoviricetes	dsDNA	Prokaryote	Duplodnaviria	Heunggongvirae	Uroviricota	Caudoviricetes
SM1000_MG_virome_scaffold_1561_c2	SM1000_MG_virome_scaffold_1561_c2	MG_virome	yes	11046	No	19	5	0	Low-quality	Genome-fragment	19.98	AAI-based (medium-confidence)	1		11	0.9819	2	20.5454	Viruses;Duplodnaviria;Heunggongvirae;Uroviricota;Caudoviricetes	dsDNA	Prokaryote	Duplodnaviria	Heunggongvirae	Uroviricota	Caudoviricetes
SM1000_MG_virome_scaffold_1562_c2	SM1000_MG_virome_scaffold_1562_c2	MG_virome	yes	27537	No	36	16	0	Low-quality	Genome-fragment	37.11	HMM-based (lower-bound)	1		11	0.975	9	29.9464	Viruses;Duplodnaviria;Heunggongvirae;Uroviricota;Caudoviricetes	dsDNA	Prokaryote	Duplodnaviria	Heunggongvirae	Uroviricota	Caudoviricetes
SM1000_MG_virome_scaffold_1563_c1	SM1000_MG_virome_scaffold_1563_c1,SM1005_MG_virome_scaffold_2731_c2	MG_virome	yes	29710	No	46	9	0	Medium-quality	Genome-fragment	64.11	AAI-based (medium-confidence)	1		11	0.9723	8	21.854	Viruses;Duplodnaviria;Heunggongvirae;Uroviricota;Caudoviricetes	dsDNA	Prokaryote	Duplodnaviria	Heunggongvirae	Uroviricota	Caudoviricetes
SM1000_MG_virome_scaffold_1564_c1	SM1000_MG_virome_scaffold_1564_c1	MG_virome	yes	18061	No	17	4	0	Low-quality	Genome-fragment	8.93	AAI-based (medium-confidence)	1		11	0.9808	2	18.5494	Viruses;Duplodnaviria;Heunggongvirae;Uroviricota;Caudoviricetes	dsDNA	Prokaryote	Duplodnaviria	Heunggongvirae	Uroviricota	Caudoviricetes
SM1000_MG_virome_scaffold_1565_c1	SM1000_MG_virome_scaffold_1565_c1	MG_virome	yes	16362	No	21	3	0	Low-quality	Genome-fragment	4.7	AAI-based (medium-confidence)	1		11	0.9789	2	28.4535	Viruses;Duplodnaviria;Heunggongvirae;Uroviricota;Caudoviricetes	dsDNA	Prokaryote	Duplodnaviria	Heunggongvirae	Uroviricota	Caudoviricetes
SM1000_MG_virome_scaffold_1565_c2	SM1000_MG_virome_scaffold_1565_c2	MG_virome	yes	13245	No	14	2	0	Low-quality	Genome-fragment	3.95	AAI-based (medium-confidence)	1		11	0.9766	2	13.8841	Viruses;Duplodnaviria;Heunggongvirae;Uroviricota;Caudoviricetes	dsDNA	Prokaryote	Duplodnaviria	Heunggongvirae	Uroviricota	Caudoviricetes
SM1000_MG_virome_scaffold_1566_c2	SM1000_MG_virome_scaffold_1566_c2	MG_virome	yes	22070	No	28	7	0	Medium-quality	Genome-fragment	69.06	AAI-based (medium-confidence)	1		11	0.9816	4	27.4084	Viruses;Duplodnaviria;Heunggongvirae;Uroviricota;Caudoviricetes	dsDNA	Prokaryote	Duplodnaviria	Heunggongvirae	Uroviricota	Caudoviricetes
SM1000_MG_virome_scaffold_1567_c1	SM1000_MG_virome_scaffold_1567_c1	MG_virome	yes	29599	No	57	21	0	Medium-quality	Genome-fragment	54.5	AAI-based (high-confidence)	1		11	0.9793	3	39.4729	Viruses;Duplodnaviria;Heunggongvirae;Uroviricota;Caudoviricetes	dsDNA	Prokaryote	Duplodnaviria	Heunggongvirae	Uroviricota	Caudoviricetes
SM1000_MG_virome_scaffold_1568_c2	SM1000_MG_virome_scaffold_1568_c2	MG_virome	yes	21579	No	20	18	0	Low-quality	Genome-fragment	16.61	AAI-based (high-confidence)	1		11	0.9822	2	30.207	Viruses;Duplodnaviria;Heunggongvirae;Uroviricota;Caudoviricetes	dsDNA	Prokaryote	Duplodnaviria	Heunggongvirae	Uroviricota	Caudoviricetes
SM1000_MG_virome_scaffold_157_c1	SM1000_MG_virome_scaffold_157_c1	MG_virome	yes	81444	No	128	15	1	Complete	High-quality	100	DTR (high-confidence)	1		11	0.9683	11	84.0883	Viruses;Duplodnaviria;Heunggongvirae;Uroviricota;Caudoviricetes	dsDNA	Prokaryote	Duplodnaviria	Heunggongvirae	Uroviricota	Caudoviricetes
SM1000_MG_virome_scaffold_1570_c1	SM1000_MG_virome_scaffold_1570_c1	MG_virome	yes	29529	No	42	7	2	Low-quality	Genome-fragment	25.88	AAI-based (medium-confidence)	1		11	0.9808	2	22.6394	Viruses;Duplodnaviria;Heunggongvirae;Uroviricota;Caudoviricetes	dsDNA	Prokaryote	Duplodnaviria	Heunggongvirae	Uroviricota	Caudoviricetes
SM1000_MG_virome_scaffold_1572_c3	SM1000_MG_virome_scaffold_1572_c3	MG_virome	yes	10200	No	16	4	0	Low-quality	Genome-fragment	15.76	AAI-based (medium-confidence)	1		11	0.9697	1	6.3015	Viruses;Duplodnaviria;Heunggongvirae;Uroviricota;Caudoviricetes	dsDNA	Prokaryote	Duplodnaviria	Heunggongvirae	Uroviricota	Caudoviricetes
SM1000_MG_virome_scaffold_1573_c1	SM1000_MG_virome_scaffold_1573_c1	MG_virome	yes	21080	No	28	5	1	Medium-quality	Genome-fragment	50.46	AAI-based (high-confidence)	1		11	0.9743	4	10.393	Viruses;Duplodnaviria;Heunggongvirae;Uroviricota;Caudoviricetes	dsDNA	Prokaryote	Duplodnaviria	Heunggongvirae	Uroviricota	Caudoviricetes
SM1000_MG_virome_scaffold_1575_c3	SM1000_MG_virome_scaffold_1575_c3	MG_virome	yes	18134	No	38	5	2	Low-quality	Genome-fragment	22.12	AAI-based (high-confidence)	1		11	0.9797	0	17.5251	Viruses;Duplodnaviria;Heunggongvirae;Uroviricota;Caudoviricetes	dsDNA	Prokaryote	Duplodnaviria	Heunggongvirae	Uroviricota	Caudoviricetes
SM1000_MG_virome_scaffold_1576_c2	SM1000_MG_virome_scaffold_1576_c2	MG_virome	yes	22425	No	26	3	2	Low-quality	Genome-fragment	26.69	HMM-based (lower-bound)	1		11	0.9497	0	8.0368	Viruses;Duplodnaviria;Heunggongvirae;Uroviricota;Caudoviricetes	dsDNA	Prokaryote	Duplodnaviria	Heunggongvirae	Uroviricota	Caudoviricetes
SM1000_MG_virome_scaffold_1577_c3	SM1000_MG_virome_scaffold_1577_c3	MG_virome	yes	11872	No	18	3	0	Low-quality	Genome-fragment	31.67	AAI-based (medium-confidence)	1		11	0.9779	1	6.5967	Viruses;Duplodnaviria;Heunggongvirae;Uroviricota;Caudoviricetes	dsDNA	Prokaryote	Duplodnaviria	Heunggongvirae	Uroviricota	Caudoviricetes
SM1000_MG_virome_scaffold_1578_c1	SM1000_MG_virome_scaffold_1578_c1	MG_virome	yes	29432	No	70	7	2	Low-quality	Genome-fragment	19.95	AAI-based (high-confidence)	1		11	0.978	3	18.5321	Viruses;Duplodnaviria;Heunggongvirae;Uroviricota;Caudoviricetes	dsDNA	Prokaryote	Duplodnaviria	Heunggongvirae	Uroviricota	Caudoviricetes
SM1000_MG_virome_scaffold_1579_c4	SM1000_MG_virome_scaffold_1579_c4	MG_virome	yes	15342	No	16	12	0	Low-quality	Genome-fragment	35.65	AAI-based (high-confidence)	1		11	0.9624	5	18.4014	Viruses;Duplodnaviria;Heunggongvirae;Uroviricota;Caudoviricetes	dsDNA	Prokaryote	Duplodnaviria	Heunggongvirae	Uroviricota	Caudoviricetes
SM1000_MG_virome_scaffold_158_c7	SM1000_MG_virome_scaffold_158_c7	MG_virome	yes	42602	No	74	8	0	Low-quality	Genome-fragment	30.96	AAI-based (medium-confidence)	1		11	0.9764	2	28.9776	Viruses;Duplodnaviria;Heunggongvirae;Uroviricota;Caudoviricetes	dsDNA	Prokaryote	Duplodnaviria	Heunggongvirae	Uroviricota	Caudoviricetes
SM1000_MG_virome_scaffold_1580_c1	SM1000_MG_virome_scaffold_1580_c1	MG_virome	yes	29430	No	26	17	0	Low-quality	Genome-fragment	22.36	AAI-based (high-confidence)	1		11	0.9825	1	31.2921	Viruses;Duplodnaviria;Heunggongvirae;Uroviricota;Caudoviricetes	dsDNA	Prokaryote	Duplodnaviria	Heunggongvirae	Uroviricota	Caudoviricetes
SM1000_MG_virome_scaffold_1581_c1	SM1000_MG_virome_scaffold_1581_c1	MG_virome	yes	18121	No	44	10	0	Low-quality	Genome-fragment	31.3	AAI-based (medium-confidence)	1		11	0.9774	1	19.4372	Viruses;Duplodnaviria;Heunggongvirae;Uroviricota;Caudoviricetes	dsDNA	Prokaryote	Duplodnaviria	Heunggongvirae	Uroviricota	Caudoviricetes
SM1000_MG_virome_scaffold_1581_c2	SM1000_MG_virome_scaffold_1581_c2	MG_virome	yes	11229	No	13	10	0	Low-quality	Genome-fragment	17.27	HMM-based (lower-bound)	1		11	0.9759	9	16.3852	Viruses;Duplodnaviria;Heunggongvirae;Uroviricota;Caudoviricetes	dsDNA	Prokaryote	Duplodnaviria	Heunggongvirae	Uroviricota	Caudoviricetes
SM1000_MG_virome_scaffold_1582_c2	SM1000_MG_virome_scaffold_1582_c2	MG_virome	yes	28251	No	54	2	0	Low-quality	Genome-fragment	25.03	HMM-based (lower-bound)	1		11	0.9757	1	20.8193	Viruses;Duplodnaviria;Heunggongvirae;Uroviricota;Caudoviricetes	dsDNA	Prokaryote	Duplodnaviria	Heunggongvirae	Uroviricota	Caudoviricetes
SM1000_MG_virome_scaffold_1584_c1	SM1000_MG_virome_scaffold_1584_c1	MG_virome	yes	29381	No	46	9	2	Medium-quality	Genome-fragment	61.95	AAI-based (medium-confidence)	1.01		11	0.9777	6	20.4746	Viruses;Duplodnaviria;Heunggongvirae;Uroviricota;Caudoviricetes	dsDNA	Prokaryote	Duplodnaviria	Heunggongvirae	Uroviricota	Caudoviricetes
SM1000_MG_virome_scaffold_1585_c1	SM1000_MG_virome_scaffold_1585_c1	MG_virome	yes	15157	No	16	6	0	Low-quality	Genome-fragment	8.47	AAI-based (high-confidence)	1		11	0.98	1	19.2771	Viruses;Duplodnaviria;Heunggongvirae;Uroviricota;Caudoviricetes	dsDNA	Prokaryote	Duplodnaviria	Heunggongvirae	Uroviricota	Caudoviricetes
SM1000_MG_virome_scaffold_1585_c2	SM1000_MG_virome_scaffold_1585_c2	MG_virome	yes	14195	No	11	4	0	Low-quality	Genome-fragment	7.64	AAI-based (medium-confidence)	1		11	0.9622	1	16.4694	Viruses;Duplodnaviria;Heunggongvirae;Uroviricota;Caudoviricetes	dsDNA	Prokaryote	Duplodnaviria	Heunggongvirae	Uroviricota	Caudoviricetes
SM1000_MG_virome_scaffold_1586_c1	SM1000_MG_virome_scaffold_1586_c1	MG_virome	yes	29340	No	44	9	0	Medium-quality	Genome-fragment	59.04	AAI-based (medium-confidence)	1		11	0.9696	4	28.0794	Viruses;Duplodnaviria;Heunggongvirae;Uroviricota;Caudoviricetes	dsDNA	Prokaryote	Duplodnaviria	Heunggongvirae	Uroviricota	Caudoviricetes
SM1000_MG_virome_scaffold_1587_c1	SM1000_MG_virome_scaffold_1587_c1	MG_virome	yes	10977	No	14	1	0	Low-quality	Genome-fragment	16.42	HMM-based (lower-bound)	1		11	0.9822	2	15.9984	Viruses;Duplodnaviria;Heunggongvirae;Uroviricota;Caudoviricetes	dsDNA	Prokaryote	Duplodnaviria	Heunggongvirae	Uroviricota	Caudoviricetes
SM1000_MG_virome_scaffold_1587_c2	SM1000_MG_virome_scaffold_1587_c2	MG_virome	yes	18317	No	27	8	0	Medium-quality	Genome-fragment	60.73	AAI-based (medium-confidence)	1		11	0.9785	2	23.0441	Viruses;Duplodnaviria;Heunggongvirae;Uroviricota;Caudoviricetes	dsDNA	Prokaryote	Duplodnaviria	Heunggongvirae	Uroviricota	Caudoviricetes
SM1000_MG_virome_scaffold_1589_c3	SM1000_MG_virome_scaffold_1589_c3	MG_virome	yes	22680	No	35	2	0	Low-quality	Genome-fragment	33.91	HMM-based (lower-bound)	1		11	0.886	1	4.9087	Viruses;Duplodnaviria;Heunggongvirae;Uroviricota;Caudoviricetes	dsDNA	Prokaryote	Duplodnaviria	Heunggongvirae	Uroviricota	Caudoviricetes
SM1000_MG_virome_scaffold_159_c3	SM1000_MG_virome_scaffold_159_c3	MG_virome	yes	36365	No	50	2	2	Low-quality	Genome-fragment	11.49	AAI-based (medium-confidence)	1		11	0.9725	0	49.9527	Viruses;Duplodnaviria;Heunggongvirae;Uroviricota;Caudoviricetes	dsDNA	Prokaryote	Duplodnaviria	Heunggongvirae	Uroviricota	Caudoviricetes
SM1000_MG_virome_scaffold_159_c4	SM1000_MG_virome_scaffold_159_c4	MG_virome	yes	24998	No	22	5	1	Low-quality	Genome-fragment	7.92	AAI-based (medium-confidence)	1		11	0.976	5	33.7292	Viruses;Duplodnaviria;Heunggongvirae;Uroviricota;Caudoviricetes	dsDNA	Prokaryote	Duplodnaviria	Heunggongvirae	Uroviricota	Caudoviricetes
SM1000_MG_virome_scaffold_1590_c1	SM1000_MG_virome_scaffold_1590_c1	MG_virome	yes	10822	No	15	5	0	Low-quality	Genome-fragment	18.47	HMM-based (lower-bound)	1		11	0.9712	4	11.1008	Viruses;Duplodnaviria;Heunggongvirae;Uroviricota;Caudoviricetes	dsDNA	Prokaryote	Duplodnaviria	Heunggongvirae	Uroviricota	Caudoviricetes
SM1000_MG_virome_scaffold_1590_c4	SM1000_MG_virome_scaffold_1590_c4	MG_virome	yes	13347	No	9	1	0	Low-quality	Genome-fragment	26.86	HMM-based (lower-bound)	1		11	0.9485	1	8.3686	Viruses;Duplodnaviria;Heunggongvirae;Uroviricota;Caudoviricetes	dsDNA	Prokaryote	Duplodnaviria	Heunggongvirae	Uroviricota	Caudoviricetes
SM1000_MG_virome_scaffold_1593_c1	SM1000_MG_virome_scaffold_1593_c1	MG_virome	yes	28987	No	43	7	2	Low-quality	Genome-fragment	21.4	AAI-based (medium-confidence)	1		11	0.9485	4	19.6821	Viruses;Duplodnaviria;Heunggongvirae;Uroviricota;Caudoviricetes	dsDNA	Prokaryote	Duplodnaviria	Heunggongvirae	Uroviricota	Caudoviricetes
SM1000_MG_virome_scaffold_1594_c1	SM1000_MG_virome_scaffold_1594_c1	MG_virome	yes	28980	No	27	6	0	Low-quality	Genome-fragment	48.83	AAI-based (medium-confidence)	1		11	0.9801	3	21.3207	Viruses;Duplodnaviria;Heunggongvirae;Uroviricota;Caudoviricetes	dsDNA	Prokaryote	Duplodnaviria	Heunggongvirae	Uroviricota	Caudoviricetes
SM1000_MG_virome_scaffold_1595_c1	SM1000_MG_virome_scaffold_1595_c1	MG_virome	yes	28947	No	57	4	1	Low-quality	Genome-fragment	20.07	HMM-based (lower-bound)	1		11	0.9526	3	24.4479	Viruses;Duplodnaviria;Heunggongvirae;Uroviricota;Caudoviricetes	dsDNA	Prokaryote	Duplodnaviria	Heunggongvirae	Uroviricota	Caudoviricetes
SM1000_MG_virome_scaffold_1597_c1	SM1000_MG_virome_scaffold_1597_c1	MG_virome	yes	20006	No	36	9	1	Low-quality	Genome-fragment	15.58	AAI-based (medium-confidence)	1		11	0.9697	1	21.6959	Viruses;Duplodnaviria;Heunggongvirae;Uroviricota;Caudoviricetes	dsDNA	Prokaryote	Duplodnaviria	Heunggongvirae	Uroviricota	Caudoviricetes
SM1000_MG_virome_scaffold_1598_c1	SM1000_MG_virome_scaffold_1598_c1	MG_virome	yes	28854	No	47	11	1	Low-quality	Genome-fragment	40.71	AAI-based (medium-confidence)	1		11	0.9807	4	18.5095	Viruses;Duplodnaviria;Heunggongvirae;Uroviricota;Caudoviricetes	dsDNA	Prokaryote	Duplodnaviria	Heunggongvirae	Uroviricota	Caudoviricetes
SM1000_MG_virome_scaffold_1599_c1	SM1000_MG_virome_scaffold_1599_c1	MG_virome	yes	28852	No	32	21	0	Medium-quality	Genome-fragment	56.09	AAI-based (high-confidence)	1		11	0.9804	13	41.7259	Viruses;Duplodnaviria;Heunggongvirae;Uroviricota;Caudoviricetes	dsDNA	Prokaryote	Duplodnaviria	Heunggongvirae	Uroviricota	Caudoviricetes
SM1000_MG_virome_scaffold_16_c2	SM1000_MG_virome_scaffold_16_c2	MG_virome	yes	39668	No	68	1	1	Low-quality	Genome-fragment	18.81	AAI-based (medium-confidence)	1		11	0.9681	1	4.634	Viruses;Duplodnaviria;Heunggongvirae;Uroviricota;Caudoviricetes	dsDNA	Prokaryote	Duplodnaviria	Heunggongvirae	Uroviricota	Caudoviricetes
SM1000_MG_virome_scaffold_16_c3	SM1000_MG_virome_scaffold_16_c3	MG_virome	yes	63633	No	51	13	0	Low-quality	Genome-fragment	30.04	AAI-based (high-confidence)	1		11	0.9818	5	57.0238	Viruses;Duplodnaviria;Heunggongvirae;Uroviricota;Caudoviricetes	dsDNA	Prokaryote	Duplodnaviria	Heunggongvirae	Uroviricota	Caudoviricetes
SM1000_MG_virome_scaffold_16_c5	SM1000_MG_virome_scaffold_16_c5	MG_virome	yes	49967	No	85	9	6	Low-quality	Genome-fragment	23.7	AAI-based (medium-confidence)	1		11	0.9806	5	43.0287	Viruses;Duplodnaviria;Heunggongvirae;Uroviricota;Caudoviricetes	dsDNA	Prokaryote	Duplodnaviria	Heunggongvirae	Uroviricota	Caudoviricetes
SM1000_MG_virome_scaffold_16_c6	SM1000_MG_virome_scaffold_16_c6	MG_virome	yes	10465	No	26	2	2	Low-quality	Genome-fragment	5.56	HMM-based (lower-bound)	1		11	0.9368	0	6.7952	Viruses;Duplodnaviria;Heunggongvirae;Uroviricota;Caudoviricetes	dsDNA	Prokaryote	Duplodnaviria	Heunggongvirae	Uroviricota	Caudoviricetes
SM1000_MG_virome_scaffold_160_c5	SM1000_MG_virome_scaffold_160_c5	MG_virome	yes	18614	No	34	3	1	Low-quality	Genome-fragment	4.16	AAI-based (medium-confidence)	1		11	0.9101	0	2.398	Viruses;Duplodnaviria;Heunggongvirae;Uroviricota;Caudoviricetes	dsDNA	Prokaryote	Duplodnaviria	Heunggongvirae	Uroviricota	Caudoviricetes
SM1000_MG_virome_scaffold_1601_c1	SM1000_MG_virome_scaffold_1601_c1	MG_virome	yes	28827	No	41	15	1	Medium-quality	Genome-fragment	68.94	AAI-based (medium-confidence)	1		11	0.9639	14	35.7425	Viruses;Duplodnaviria;Heunggongvirae;Uroviricota;Caudoviricetes	dsDNA	Prokaryote	Duplodnaviria	Heunggongvirae	Uroviricota	Caudoviricetes
SM1000_MG_virome_scaffold_1602_c2	SM1000_MG_virome_scaffold_1602_c2	MG_virome	yes	10278	No	13	6	0	Low-quality	Genome-fragment	24.92	AAI-based (medium-confidence)	1		11	0.9823	5	16.0306	Viruses;Duplodnaviria;Heunggongvirae;Uroviricota;Caudoviricetes	dsDNA	Prokaryote	Duplodnaviria	Heunggongvirae	Uroviricota	Caudoviricetes
SM1000_MG_virome_scaffold_1603_c1	SM1000_MG_virome_scaffold_1603_c1	MG_virome	yes	28794	No	39	14	1	Low-quality	Genome-fragment	43.5	HMM-based (lower-bound)	1		11	0.9788	9	30.9359	Viruses;Duplodnaviria;Heunggongvirae;Uroviricota;Caudoviricetes	dsDNA	Prokaryote	Duplodnaviria	Heunggongvirae	Uroviricota	Caudoviricetes
SM1000_MG_virome_scaffold_1604_c2	SM1000_MG_virome_scaffold_1604_c2	MG_virome	yes	11442	No	23	2	0	Low-quality	Genome-fragment	19.68	HMM-based (lower-bound)	1		11	0.973	1	4.9059	Viruses;Duplodnaviria;Heunggongvirae;Uroviricota;Caudoviricetes	dsDNA	Prokaryote	Duplodnaviria	Heunggongvirae	Uroviricota	Caudoviricetes
SM1000_MG_virome_scaffold_1604_c3	SM1000_MG_virome_scaffold_1604_c3	MG_virome	yes	10141	No	11	1	0	Low-quality	Genome-fragment	15.99	HMM-based (lower-bound)	1		11	0.9706	1	3.0375	Viruses;Duplodnaviria;Heunggongvirae;Uroviricota;Caudoviricetes	dsDNA	Prokaryote	Duplodnaviria	Heunggongvirae	Uroviricota	Caudoviricetes
SM1000_MG_virome_scaffold_1605_c1	SM1000_MG_virome_scaffold_1605_c1	MG_virome	yes	28685	No	67	2	1	Low-quality	Genome-fragment	35.62	HMM-based (lower-bound)	1.16		11	0.9375	0	6.5667	Viruses;Duplodnaviria;Heunggongvirae;Uroviricota;Caudoviricetes	dsDNA	Prokaryote	Duplodnaviria	Heunggongvirae	Uroviricota	Caudoviricetes
SM1000_MG_virome_scaffold_1606_c1	SM1000_MG_virome_scaffold_1606_c1	MG_virome	yes	15311	No	29	5	0	Low-quality	Genome-fragment	22	AAI-based (medium-confidence)	1		11	0.9717	1	8.1749	Viruses;Duplodnaviria;Heunggongvirae;Uroviricota;Caudoviricetes	dsDNA	Prokaryote	Duplodnaviria	Heunggongvirae	Uroviricota	Caudoviricetes
SM1000_MG_virome_scaffold_1606_c2	SM1000_MG_virome_scaffold_1606_c2	MG_virome	yes	12102	No	30	5	0	Low-quality	Genome-fragment	12.18	HMM-based (lower-bound)	1		11	0.9754	0	10.1141	Viruses;Duplodnaviria;Heunggongvirae;Uroviricota;Caudoviricetes	dsDNA	Prokaryote	Duplodnaviria	Heunggongvirae	Uroviricota	Caudoviricetes
SM1000_MG_virome_scaffold_1608_c1	SM1000_MG_virome_scaffold_1608_c1	MG_virome	yes	18829	No	18	8	1	Low-quality	Genome-fragment	47.86	AAI-based (high-confidence)	1		11	0.9705	1	13.3016	Viruses;Duplodnaviria;Heunggongvirae;Uroviricota;Caudoviricetes;Autographiviridae	dsDNA	Prokaryote	Duplodnaviria	Heunggongvirae	Uroviricota	Caudoviricetes		Autographiviridae
SM1000_MG_virome_scaffold_161_c1	SM1000_MG_virome_scaffold_161_c1	MG_virome	yes	79910	No	120	12	3	Medium-quality	Genome-fragment	59.25	AAI-based (medium-confidence)	1		11	0.973	6	31.0805	Viruses;Duplodnaviria;Heunggongvirae;Uroviricota;Caudoviricetes	dsDNA	Prokaryote	Duplodnaviria	Heunggongvirae	Uroviricota	Caudoviricetes
SM1000_MG_virome_scaffold_1610_c1	SM1000_MG_virome_scaffold_1610_c1	MG_virome	yes	28538	No	32	11	3	Low-quality	Genome-fragment	42.57	AAI-based (medium-confidence)	1		11	0.9656	10	33.3217	Viruses;Duplodnaviria;Heunggongvirae;Uroviricota;Caudoviricetes	dsDNA	Prokaryote	Duplodnaviria	Heunggongvirae	Uroviricota	Caudoviricetes
SM1000_MG_virome_scaffold_1612_c1	SM1000_MG_virome_scaffold_1612_c1	MG_virome	yes	28512	No	21	10	1	Low-quality	Genome-fragment	13.52	HMM-based (lower-bound)	1		11	0.9799	2	17.9424	Viruses;Duplodnaviria;Heunggongvirae;Uroviricota;Caudoviricetes	dsDNA	Prokaryote	Duplodnaviria	Heunggongvirae	Uroviricota	Caudoviricetes
SM1000_MG_virome_scaffold_1613_c3	SM1000_MG_virome_scaffold_1613_c3	MG_virome	yes	13370	No	18	3	0	Low-quality	Genome-fragment	31.94	AAI-based (medium-confidence)	1		4	0.9111	1	7.793	Viruses;Duplodnaviria;Heunggongvirae;Uroviricota;Caudoviricetes	dsDNA	Prokaryote	Duplodnaviria	Heunggongvirae	Uroviricota	Caudoviricetes
SM1000_MG_virome_scaffold_1615_c2	SM1000_MG_virome_scaffold_1615_c2	MG_virome	yes	13242	No	17	10	0	Low-quality	Genome-fragment	36.26	AAI-based (high-confidence)	1		11	0.9805	8	15.3203	Viruses;Duplodnaviria;Heunggongvirae;Uroviricota;Caudoviricetes	dsDNA	Prokaryote	Duplodnaviria	Heunggongvirae	Uroviricota	Caudoviricetes
SM1000_MG_virome_scaffold_1615_c3	SM1000_MG_virome_scaffold_1615_c3	MG_virome	yes	11275	No	24	2	0	Low-quality	Genome-fragment	30.88	AAI-based (high-confidence)	1		11	0.977	2	14.2284	Viruses;Duplodnaviria;Heunggongvirae;Uroviricota;Caudoviricetes	dsDNA	Prokaryote	Duplodnaviria	Heunggongvirae	Uroviricota	Caudoviricetes
SM1000_MG_virome_scaffold_1617_c2	SM1000_MG_virome_scaffold_1617_c2	MG_virome	yes	27959	No	38	5	0	Low-quality	Genome-fragment	38.16	HMM-based (lower-bound)	1		11	0.9733	1	16.8329	Viruses;Duplodnaviria;Heunggongvirae;Uroviricota;Caudoviricetes	dsDNA	Prokaryote	Duplodnaviria	Heunggongvirae	Uroviricota	Caudoviricetes
SM1000_MG_virome_scaffold_1618_c2	SM1000_MG_virome_scaffold_1618_c2	MG_virome	yes	26409	No	39	13	0	Low-quality	Genome-fragment	46.29	AAI-based (medium-confidence)	1		11	0.9754	2	24.1816	Viruses;Duplodnaviria;Heunggongvirae;Uroviricota;Caudoviricetes	dsDNA	Prokaryote	Duplodnaviria	Heunggongvirae	Uroviricota	Caudoviricetes
SM1000_MG_virome_scaffold_162_c1	SM1000_MG_virome_scaffold_162_c1	MG_virome	yes	27156	No	62	15	0	Low-quality	Genome-fragment	21.92	AAI-based (medium-confidence)	1		11	0.9784	0	23.1315	Viruses;Duplodnaviria;Heunggongvirae;Uroviricota;Caudoviricetes	dsDNA	Prokaryote	Duplodnaviria	Heunggongvirae	Uroviricota	Caudoviricetes
SM1000_MG_virome_scaffold_162_c3	SM1000_MG_virome_scaffold_162_c3	MG_virome	yes	20527	No	13	2	0	Low-quality	Genome-fragment	17.79	AAI-based (medium-confidence)	1		15	0.9798	2	9.4954	Viruses;Duplodnaviria;Heunggongvirae;Uroviricota;Caudoviricetes	dsDNA	Prokaryote	Duplodnaviria	Heunggongvirae	Uroviricota	Caudoviricetes
SM1000_MG_virome_scaffold_162_c4	SM1000_MG_virome_scaffold_162_c4	MG_virome	yes	12264	No	15	3	0	Low-quality	Genome-fragment	10.67	AAI-based (medium-confidence)	1		11	0.9791	1	8.1899	Viruses;Duplodnaviria;Heunggongvirae;Uroviricota;Caudoviricetes	dsDNA	Prokaryote	Duplodnaviria	Heunggongvirae	Uroviricota	Caudoviricetes
SM1000_MG_virome_scaffold_162_c5	SM1000_MG_virome_scaffold_162_c5	MG_virome	yes	16699	No	31	2	0	Low-quality	Genome-fragment	14.46	AAI-based (medium-confidence)	1		11	0.9746	3	4.6561	Viruses;Duplodnaviria;Heunggongvirae;Uroviricota;Caudoviricetes	dsDNA	Prokaryote	Duplodnaviria	Heunggongvirae	Uroviricota	Caudoviricetes
SM1000_MG_virome_scaffold_1620_c1	SM1000_MG_virome_scaffold_1620_c1	MG_virome	yes	28278	No	38	12	0	Low-quality	Genome-fragment	43.48	AAI-based (medium-confidence)	1		11	0.9795	3	29.9885	Viruses;Duplodnaviria;Heunggongvirae;Uroviricota;Caudoviricetes	dsDNA	Prokaryote	Duplodnaviria	Heunggongvirae	Uroviricota	Caudoviricetes
SM1000_MG_virome_scaffold_1622_c1_1|1-19717/22237	SM1000_MG_virome_scaffold_1622_c1_1|1-19717/22237	MG_virome	yes	19717	Yes	28	6	1	Low-quality	Genome-fragment	4.41	AAI-based (medium-confidence)	1	1-19717	11	0.9337	0	17.7048	Viruses;Duplodnaviria;Heunggongvirae;Uroviricota;Caudoviricetes	dsDNA	Prokaryote	Duplodnaviria	Heunggongvirae	Uroviricota	Caudoviricetes
SM1000_MG_virome_scaffold_1623_c3	SM1000_MG_virome_scaffold_1623_c3	MG_virome	yes	16824	No	29	9	0	Low-quality	Genome-fragment	27.07	HMM-based (lower-bound)	1		11	0.9767	1	22.8056	Viruses;Duplodnaviria;Heunggongvirae;Uroviricota;Caudoviricetes	dsDNA	Prokaryote	Duplodnaviria	Heunggongvirae	Uroviricota	Caudoviricetes
SM1000_MG_virome_scaffold_1624_c3	SM1000_MG_virome_scaffold_1624_c3	MG_virome	yes	14333	No	29	2	1	Low-quality	Genome-fragment	21.09	HMM-based (lower-bound)	1		11	0.9407	2	7.8808	Viruses;Duplodnaviria;Heunggongvirae;Uroviricota;Caudoviricetes	dsDNA	Prokaryote	Duplodnaviria	Heunggongvirae	Uroviricota	Caudoviricetes
SM1000_MG_virome_scaffold_1625_c6	SM1000_MG_virome_scaffold_1625_c6	MG_virome	yes	17211	No	21	5	0	Low-quality	Genome-fragment	44.94	AAI-based (medium-confidence)	1		11	0.9799	4	14.5664	Viruses;Duplodnaviria;Heunggongvirae;Uroviricota;Caudoviricetes	dsDNA	Prokaryote	Duplodnaviria	Heunggongvirae	Uroviricota	Caudoviricetes
SM1000_MG_virome_scaffold_1626_c1	SM1000_MG_virome_scaffold_1626_c1	MG_virome	yes	10478	No	16	3	0	Low-quality	Genome-fragment	19.73	AAI-based (medium-confidence)	1.05		11	0.9746	1	10.042	Viruses;Duplodnaviria;Heunggongvirae;Uroviricota;Caudoviricetes	dsDNA	Prokaryote	Duplodnaviria	Heunggongvirae	Uroviricota	Caudoviricetes
SM1000_MG_virome_scaffold_1628_c1	SM1000_MG_virome_scaffold_1628_c1	MG_virome	yes	28122	No	40	7	0	Low-quality	Genome-fragment	31.8	HMM-based (lower-bound)	1		11	0.9703	6	24.7269	Viruses;Duplodnaviria;Heunggongvirae;Uroviricota;Caudoviricetes	dsDNA	Prokaryote	Duplodnaviria	Heunggongvirae	Uroviricota	Caudoviricetes
SM1000_MG_virome_scaffold_1629_c1	SM1000_MG_virome_scaffold_1629_c1	MG_virome	yes	12477	No	29	3	1	Low-quality	Genome-fragment	2.65	AAI-based (medium-confidence)	1		11	0.9445	2	15.7825	Viruses;Duplodnaviria;Heunggongvirae;Uroviricota;Caudoviricetes	dsDNA	Prokaryote	Duplodnaviria	Heunggongvirae	Uroviricota	Caudoviricetes
SM1000_MG_virome_scaffold_163_c1	SM1000_MG_virome_scaffold_163_c1	MG_virome	yes	79636	No	110	17	0	High-quality	High-quality	100	AAI-based (medium-confidence)	1.01		11	0.9786	4	50.1657	Viruses;Duplodnaviria;Heunggongvirae;Uroviricota;Caudoviricetes	dsDNA	Prokaryote	Duplodnaviria	Heunggongvirae	Uroviricota	Caudoviricetes
SM1000_MG_virome_scaffold_1630_c4	SM1000_MG_virome_scaffold_1630_c4	MG_virome	yes	10550	No	23	5	0	Low-quality	Genome-fragment	10.96	HMM-based (lower-bound)	1		11	0.9779	0	15.108	Viruses;Duplodnaviria;Heunggongvirae;Uroviricota;Caudoviricetes	dsDNA	Prokaryote	Duplodnaviria	Heunggongvirae	Uroviricota	Caudoviricetes
SM1000_MG_virome_scaffold_1631_c2	SM1000_MG_virome_scaffold_1631_c2	MG_virome	yes	26658	No	52	3	0	Low-quality	Genome-fragment	46.98	HMM-based (lower-bound)	1		11	0.9493	2	13.9227	Viruses;Duplodnaviria;Heunggongvirae;Uroviricota;Caudoviricetes	dsDNA	Prokaryote	Duplodnaviria	Heunggongvirae	Uroviricota	Caudoviricetes
SM1000_MG_virome_scaffold_1632_c1	SM1000_MG_virome_scaffold_1632_c1	MG_virome	yes	28002	No	39	11	0	Low-quality	Genome-fragment	30.06	AAI-based (medium-confidence)	1		11	0.9712	3	41.0268	Viruses;Duplodnaviria;Heunggongvirae;Uroviricota;Caudoviricetes	dsDNA	Prokaryote	Duplodnaviria	Heunggongvirae	Uroviricota	Caudoviricetes
SM1000_MG_virome_scaffold_1635_c1	SM1000_MG_virome_scaffold_1635_c1	MG_virome	yes	27944	No	37	4	0	Medium-quality	Genome-fragment	66.86	AAI-based (medium-confidence)	1		11	0.9686	4	11.4187	Viruses;Duplodnaviria;Heunggongvirae;Uroviricota;Caudoviricetes	dsDNA	Prokaryote	Duplodnaviria	Heunggongvirae	Uroviricota	Caudoviricetes
SM1000_MG_virome_scaffold_1636_c3	SM1000_MG_virome_scaffold_1636_c3	MG_virome	yes	13851	No	15	2	0	Low-quality	Genome-fragment	27.28	AAI-based (medium-confidence)	1		11	0.9765	4	12.8772	Viruses;Duplodnaviria;Heunggongvirae;Uroviricota;Caudoviricetes	dsDNA	Prokaryote	Duplodnaviria	Heunggongvirae	Uroviricota	Caudoviricetes
SM1000_MG_virome_scaffold_1637_c1	SM1000_MG_virome_scaffold_1637_c1	MG_virome	yes	15970	No	28	7	0	Low-quality	Genome-fragment	29.27	AAI-based (medium-confidence)	1		11	0.9533	0	12.3969	Viruses;Duplodnaviria;Heunggongvirae;Uroviricota;Caudoviricetes	dsDNA	Prokaryote	Duplodnaviria	Heunggongvirae	Uroviricota	Caudoviricetes
SM1000_MG_virome_scaffold_164_c1	SM1000_MG_virome_scaffold_164_c1	MG_virome	yes	79583	No	88	14	1	Complete	High-quality	100	DTR (high-confidence)	1		11	0.9805	6	50.786	Viruses;Duplodnaviria;Heunggongvirae;Uroviricota;Caudoviricetes	dsDNA	Prokaryote	Duplodnaviria	Heunggongvirae	Uroviricota	Caudoviricetes
SM1000_MG_virome_scaffold_1640_c1	SM1000_MG_virome_scaffold_1640_c1	MG_virome	yes	19107	No	25	2	0	Low-quality	Genome-fragment	22.93	HMM-based (lower-bound)	1		11	0.8439	2	11.9933	Viruses;Duplodnaviria;Heunggongvirae;Uroviricota;Caudoviricetes	dsDNA	Prokaryote	Duplodnaviria	Heunggongvirae	Uroviricota	Caudoviricetes
SM1000_MG_virome_scaffold_1641_c4	SM1000_MG_virome_scaffold_1641_c4	MG_virome	yes	12588	No	21	2	0	Low-quality	Genome-fragment	30.42	AAI-based (medium-confidence)	1		11	0.9721	1	11.235	Viruses;Duplodnaviria;Heunggongvirae;Uroviricota;Caudoviricetes	dsDNA	Prokaryote	Duplodnaviria	Heunggongvirae	Uroviricota	Caudoviricetes
SM1000_MG_virome_scaffold_1642_c1	SM1000_MG_virome_scaffold_1642_c1,SM1050_MG_virome_scaffold_793_c1	MG_virome	yes	27851	No	40	4	0	Medium-quality	Genome-fragment	72.47	AAI-based (high-confidence)	1		11	0.9684	5	28.8243	Viruses;Duplodnaviria;Heunggongvirae;Uroviricota;Caudoviricetes	dsDNA	Prokaryote	Duplodnaviria	Heunggongvirae	Uroviricota	Caudoviricetes
SM1000_MG_virome_scaffold_1643_c6	SM1000_MG_virome_scaffold_1643_c6	MG_virome	yes	14274	No	20	3	0	Low-quality	Genome-fragment	34.28	AAI-based (high-confidence)	1		11	0.9782	3	10.2419	Viruses;Duplodnaviria;Heunggongvirae;Uroviricota;Caudoviricetes	dsDNA	Prokaryote	Duplodnaviria	Heunggongvirae	Uroviricota	Caudoviricetes
SM1000_MG_virome_scaffold_1644_c1	SM1000_MG_virome_scaffold_1644_c1	MG_virome	yes	27824	No	73	11	1	Low-quality	Genome-fragment	19.1	HMM-based (lower-bound)	1		11	0.9597	1	11.3722	Viruses;Duplodnaviria;Heunggongvirae;Uroviricota;Caudoviricetes	dsDNA	Prokaryote	Duplodnaviria	Heunggongvirae	Uroviricota	Caudoviricetes
SM1000_MG_virome_scaffold_1645_c1	SM1000_MG_virome_scaffold_1645_c1	MG_virome	yes	27730	No	58	13	0	Medium-quality	Genome-fragment	76.62	AAI-based (high-confidence)	1		11	0.9719	9	39.0918	Viruses;Duplodnaviria;Heunggongvirae;Uroviricota;Caudoviricetes	dsDNA	Prokaryote	Duplodnaviria	Heunggongvirae	Uroviricota	Caudoviricetes
SM1000_MG_virome_scaffold_1646_c1	SM1000_MG_virome_scaffold_1646_c1	MG_virome	yes	27714	No	34	1	0	Low-quality	Genome-fragment	22.98	HMM-based (lower-bound)	1		11	0.9566	2	14.5354	Viruses;Duplodnaviria;Heunggongvirae;Uroviricota;Caudoviricetes	dsDNA	Prokaryote	Duplodnaviria	Heunggongvirae	Uroviricota	Caudoviricetes
SM1000_MG_virome_scaffold_1647_c2	SM1000_MG_virome_scaffold_1647_c2	MG_virome	yes	19794	No	25	4	1	Low-quality	Genome-fragment	38.93	AAI-based (medium-confidence)	1		11	0.9759	1	16.0094	Viruses;Duplodnaviria;Heunggongvirae;Uroviricota;Caudoviricetes	dsDNA	Prokaryote	Duplodnaviria	Heunggongvirae	Uroviricota	Caudoviricetes
SM1000_MG_virome_scaffold_1648_c1	SM1000_MG_virome_scaffold_1648_c1	MG_virome	yes	27676	No	28	4	0	Medium-quality	Genome-fragment	57.49	AAI-based (medium-confidence)	1		11	0.973	2	17.5996	Viruses;Duplodnaviria;Heunggongvirae;Uroviricota;Caudoviricetes	dsDNA	Prokaryote	Duplodnaviria	Heunggongvirae	Uroviricota	Caudoviricetes
SM1000_MG_virome_scaffold_1649_c1	SM1000_MG_virome_scaffold_1649_c1,SM1028_MG_virome_scaffold_225_c1,SM1005_MG_virome_scaffold_1963_c1,SM1026_MG_virome_scaffold_216_c1	MG_virome	yes	27660	No	44	10	0	Low-quality	Genome-fragment	38.93	HMM-based (lower-bound)	1		11	0.9574	6	26.1003	Viruses;Duplodnaviria;Heunggongvirae;Uroviricota;Caudoviricetes	dsDNA	Prokaryote	Duplodnaviria	Heunggongvirae	Uroviricota	Caudoviricetes
SM1000_MG_virome_scaffold_165_c1	SM1000_MG_virome_scaffold_165_c1	MG_virome	yes	79397	No	95	5	0	High-quality	High-quality	100	AAI-based (high-confidence)	1		11	0.8569	4	35.9027	Viruses;Duplodnaviria;Heunggongvirae;Uroviricota;Caudoviricetes	dsDNA	Prokaryote	Duplodnaviria	Heunggongvirae	Uroviricota	Caudoviricetes
SM1000_MG_virome_scaffold_1651_c4	SM1000_MG_virome_scaffold_1651_c4	MG_virome	yes	10008	No	10	3	0	Low-quality	Genome-fragment	23.74	AAI-based (medium-confidence)	1		11	0.9729	4	9	Viruses;Duplodnaviria;Heunggongvirae;Uroviricota;Caudoviricetes	dsDNA	Prokaryote	Duplodnaviria	Heunggongvirae	Uroviricota	Caudoviricetes
SM1000_MG_virome_scaffold_1653_c3	SM1000_MG_virome_scaffold_1653_c3	MG_virome	yes	19146	No	14	2	0	Low-quality	Genome-fragment	26.82	HMM-based (lower-bound)	1		11	0.971	2	4.7042	Viruses;Duplodnaviria;Heunggongvirae;Uroviricota;Caudoviricetes	dsDNA	Prokaryote	Duplodnaviria	Heunggongvirae	Uroviricota	Caudoviricetes
SM1000_MG_virome_scaffold_1654_c2	SM1000_MG_virome_scaffold_1654_c2	MG_virome	yes	14981	No	21	10	0	Low-quality	Genome-fragment	26.33	AAI-based (medium-confidence)	1		11	0.9814	3	23.407	Viruses;Duplodnaviria;Heunggongvirae;Uroviricota;Caudoviricetes	dsDNA	Prokaryote	Duplodnaviria	Heunggongvirae	Uroviricota	Caudoviricetes
SM1000_MG_virome_scaffold_1655_c1	SM1000_MG_virome_scaffold_1655_c1	MG_virome	yes	27535	No	37	15	0	Medium-quality	Genome-fragment	69.42	AAI-based (medium-confidence)	1		11	0.968	5	34.1526	Viruses;Duplodnaviria;Heunggongvirae;Uroviricota;Caudoviricetes	dsDNA	Prokaryote	Duplodnaviria	Heunggongvirae	Uroviricota	Caudoviricetes
SM1000_MG_virome_scaffold_1658_c3	SM1000_MG_virome_scaffold_1658_c3	MG_virome	yes	15712	No	27	4	0	Low-quality	Genome-fragment	24.08	AAI-based (medium-confidence)	1		11	0.9638	6	16.1424	Viruses;Duplodnaviria;Heunggongvirae;Uroviricota;Caudoviricetes	dsDNA	Prokaryote	Duplodnaviria	Heunggongvirae	Uroviricota	Caudoviricetes
SM1000_MG_virome_scaffold_1659_c2_1|1-22432/26605	SM1000_MG_virome_scaffold_1659_c2_1|1-22432/26605	MG_virome	yes	22432	Yes	27	4	0	Low-quality	Genome-fragment	33.92	AAI-based (high-confidence)	1	1-22432	11	0.9685	4	21.8675	Viruses;Duplodnaviria;Heunggongvirae;Uroviricota;Caudoviricetes	dsDNA	Prokaryote	Duplodnaviria	Heunggongvirae	Uroviricota	Caudoviricetes
SM1000_MG_virome_scaffold_166_c2	SM1000_MG_virome_scaffold_166_c2	MG_virome	yes	12462	No	23	5	0	Low-quality	Genome-fragment	5.26	AAI-based (medium-confidence)	1		11	0.981	1	14.0456	Viruses;Duplodnaviria;Heunggongvirae;Uroviricota;Caudoviricetes	dsDNA	Prokaryote	Duplodnaviria	Heunggongvirae	Uroviricota	Caudoviricetes
SM1000_MG_virome_scaffold_166_c3	SM1000_MG_virome_scaffold_166_c3	MG_virome	yes	35877	No	27	5	0	Low-quality	Genome-fragment	35.63	AAI-based (high-confidence)	1		11	0.9761	1	27.2028	Viruses;Duplodnaviria;Heunggongvirae;Uroviricota;Caudoviricetes;Crassvirales	dsDNA	Prokaryote	Duplodnaviria	Heunggongvirae	Uroviricota	Caudoviricetes	Crassvirales
SM1000_MG_virome_scaffold_166_c4	SM1000_MG_virome_scaffold_166_c4	MG_virome	yes	12090	No	12	3	0	Low-quality	Genome-fragment	11.99	AAI-based (medium-confidence)	1		11	0.9714	0	15.226	Viruses;Duplodnaviria;Heunggongvirae;Uroviricota;Caudoviricetes;Crassvirales	dsDNA	Prokaryote	Duplodnaviria	Heunggongvirae	Uroviricota	Caudoviricetes	Crassvirales
SM1000_MG_virome_scaffold_1660_c1	SM1000_MG_virome_scaffold_1660_c1	MG_virome	yes	20449	No	53	4	2	Low-quality	Genome-fragment	30.86	HMM-based (lower-bound)	1		11	0.9782	0	9.9284	Viruses;Duplodnaviria;Heunggongvirae;Uroviricota;Caudoviricetes	dsDNA	Prokaryote	Duplodnaviria	Heunggongvirae	Uroviricota	Caudoviricetes
[truncated: 26,155 more rows]

## Sheet: DNA_Virome
Representative_Sequence	Sequences	virus_length	provirus	gene_count	viral_genes	host_genes	checkv_quality	miuvig_quality	completeness	completeness_method	kmer_freq	coordinates	genetic_code	virus_score	n_hallmarks	marker_enrichment	taxonomy	Genome type	Host type	final_call
[truncated: 14,301 more rows]

[truncated: 12 more sheets: RNA Virome, Bacterial DNA, EukFloat DNA, Bulk MetaT, PolyA_MetaT, 23117_clustered_across_vOTUs, vOTUs_NonRedundant_wCoass_28500, RdRP_phylogenetic_trees, ICTV_virus_masterlist, iPHoP_results, RNAVirHost_results, diversity_stats]
