# Supplementary material for: Comparisons of fractionation methods for DNA and RNA viruses unearths a multifaceted relationship between viruses and soil moisture
Source: Research Square preprint supplement (doi:10.21203/rs.3.rs-7274549/v1), 2025-08-14
Supplement: Supplementary file 3 [file 9ec9b66d5bdbf5ef375b7fd3.xlsx]

## Sheet: Overview
Legend	Description
Site metadata	Metadata for each site
Sample metadata	Metadata for each sample
Read mapping Stats	Stats for read mapping results
JGI_metadata	Project IDs and sample metadata from JGI for data accesibility
Biogeochemistry	Collected biogeochemical measurements from each sample

## Sheet: site_metadata
sample	Catalog	Plot	percent_water_content	water_category_soft	Depth_cm	Irrigation	Irrigation	Wheatgrass	Rep	Corer	Date	Season	Notes	Date Extracted	Extractor	Extraction Type	mg soil (+/- 10mg)	Final DNA volume uL	Buffer Volume	Sample Volume	Qubit DNA ng/ul	NanoDrop DNA ng/ul
SM1000	SM1000	16	0.1494	higher	5_15	T1	1	Alkar	1	5cm diameter	44852	fall	T1_P16_R1_2022Oct	44896	RWM	Soil	240	100	197	3	16.3	NA
SM1001	SM1001	3	0.1202	lower	5_15	T4	0.25	Alkar	1	5cm diameter	44852	fall	T4_P3_R1_2022Oct	44896	RWM	Soil	250	100	197	3	1.41	NA
SM1002	SM1002	23	0.1264	lower	5_15	T4	0.25	Alkar	1	5cm diameter	44852	fall	T4_P23_R1_2022Oct	44896	RWM	Soil	250	100	197	3	10	NA
SM1003	SM1003	40	0.1437	intermediate	5_15	T1	1	Jose	1	5cm diameter	44852	fall	T1_P40_R1_2022Oct	44896	RWM	Soil	250	100	197	3	6.33	NA
SM1004	SM1004	42	0.1553	higher	5_15	T1	1	Alkar	1	5cm diameter	44852	fall	T1_P42_R1_2022Oct	44896	RWM	Soil	250	100	197	3	16.3	NA
SM1005	SM1005	58	0.1601	higher	5_15	T4	0.25	Alkar	1	5cm diameter	44852	fall	T4_P58_R1_2022Oct	44896	RWM	Soil	250	100	197	3	10.1	NA
SM1026	SM1026	16	0.1487	intermediate	5_15	T1	1	Alkar	1	5cm diameter	44992	spring	T1_P16_R1_2023Mar	45015	RWM	Soil	249	100	197	3	5.92	10.428
SM1027	SM1027	3	0.1129	lower	5_15	T4	0.25	Alkar	1	5cm diameter	44992	spring	T4_P3_R1_2023Mar	45051	RWM	Soil_reextract	251	44	198	2	5.28	8.784
SM1028	SM1028	23	0.1114	lower	5_15	T4	0.25	Alkar	1	5cm diameter	44992	spring	T4_P23_R1_2023Mar	45015	RWM	Soil	249	100	197	3	6.62	12.09
SM1029	SM1029	10	0.1269	lower	5_15	T1	1	Alkar	1	5cm diameter	44992	spring	T1_P10_R1_2023Mar	45051	RWM	Soil_reextract	252	44	198	2	15.3	21.168
SM1030	SM1030	42	0.1465	intermediate	5_15	T1	1	Alkar	1	5cm diameter	44992	spring	T1_P42_R1_2023Mar	45015	RWM	Soil	248	100	197	3	9.87	13.224
SM1031	SM1031	58	0.1675	higher	5_15	T4	0.25	Alkar	1	5cm diameter	44992	spring	T4_P58_R1_2023Mar	45015	RWM	Soil	249	100	197	3	10.9	14.15
SM1050	SM1050	40	0.1331	intermediate	5_15	T1	1	Jose	1	5cm diameter	44994	spring	T1_P40_R1_2023Mar	45009	RWM	Soil	248	100	197	3	7.07	9.223

## Sheet: sample_metadata
sample_name	lib_id	data_stream	concentration	volume	yield_ng	soil_extracted_g	normalized_yield	sample_size_qcnumreads	perc_removed_ribosomal	water_category_soft
SM1000_MG_bacterial	NYYOH	DNA Bacterial	6.46	100	646	20.84	30.9981	440165978	0	intermediate
SM1002_MG_bacterial	NYYOO	DNA Bacterial	1.98	100	198	20.34	9.73451	354644416	0	lower
SM1004_MG_bacterial	NYYOS	DNA Bacterial	1.87	100	187	20.45	9.14425	258354536	0	higher
SM1005_MG_bacterial	NYYOT	DNA Bacterial	5.69	100	569	20.42	27.8648	544537504	0	higher
SM1028_MG_bacterial	NYYPG	DNA Bacterial	2.45	95	232.75	20	11.6375	334661778	0	lower
SM1030_MG_bacterial	NYYPN	DNA Bacterial	5.78	95	549.1	20	27.455	417285900	0	intermediate
SM1031_MG_bacterial	NYYPO	DNA Bacterial	11.7	95	1111.5	20.02	55.5195	435021030	0	higher
SM1050_MG_bacterial	NYYPP	DNA Bacterial	5.03	95	477.85	20.12	23.75	454178110	0	intermediate
SM1000_MG_fungal	NYYOU	DNA Fungal	30.7	100	3070	0.06	51166.7	322284056	0	intermediate
SM1001_MG_fungal	NYYOW	DNA Fungal	27.9	100	2790	0.05	55800	449608964	0	lower
SM1002_MG_fungal	NYYOX	DNA Fungal	32	100	3200	0.07	45714.3	415176654	0	lower
SM1003_MG_fungal	NYYOY	DNA Fungal	11.8	100	1180	0.02	59000	427614766	0	intermediate
SM1004_MG_fungal	NYYOZ	DNA Fungal	11.3	100	1130	NA	NA	430040342	0	higher
SM1005_MG_fungal	NYYPA	DNA Fungal	19.6	100	1960	0.03	65333.3	355302386	0	higher
SM1026_MG_fungal	NYYPS	DNA Fungal	36.7	95	3486.5	0.099	35217.2	340442088	0	intermediate
SM1027_MG_fungal	NYYPT	DNA Fungal	31.5	95	2992.5	0.08	37406.2	312583086	0	lower
SM1028_MG_fungal	NYYPU	DNA Fungal	22.9	95	2175.5	0.093	23392.5	421745204	0	lower
SM1029_MG_fungal	NYYPW	DNA Fungal	30.1	95	2859.5	0.088	32494.3	342464784	0	lower
SM1030_MG_fungal	NYYPX	DNA Fungal	28	95	2660	0.144	18472.2	445445244	0	intermediate
SM1031_MG_fungal	NYYPY	DNA Fungal	33.1	95	3144.5	0.097	32417.5	427658846	0	higher
SM1050_MG_fungal	NYYPZ	DNA Fungal	21.9	95	2080.5	0.092	22614.1	549439556	0	intermediate
SM1000_MG_virome	NZAGU	DNA Virome	6.34	40	253.6	20.81	12.1864	119172626	0	intermediate
SM1001_MG_virome	NZAGW	DNA Virome	OOR	25	NA	20.13	NA	66503964	0	lower
SM1002_MG_virome	NZAGX	DNA Virome	0.0071	25	0.1775	20.13	0.00881769	92208462	0	lower
SM1003_MG_virome	NZAGY	DNA Virome	0.926	40	37.04	20.9	1.77225	111410088	0	intermediate
SM1004_MG_virome	NZAGZ	DNA Virome	0.582	40	23.28	20.17	1.15419	122496514	0	higher
SM1005_MG_virome	NZAHA	DNA Virome	1.39	40	55.6	20.68	2.68859	123729984	0	higher
SM1026_MG_virome	NZAHB	DNA Virome	0.135	45	6.075	20.03	0.303295	98573304	0	intermediate
SM1027_MG_virome	NZAHC	DNA Virome	0.0312	45	1.404	20.08	0.0699203	118493438	0	lower
SM1028_MG_virome	NZAHG	DNA Virome	0.0592	45	2.664	20	0.1332	158439672	0	lower
SM1029_MG_virome	NZAHH	DNA Virome	0.0676	45	3.042	20.04	0.151796	118930906	0	lower
SM1030_MG_virome	NZAHN	DNA Virome	0.117	45	5.265	20.02	0.262987	89929002	0	intermediate
SM1031_MG_virome	NZAHO	DNA Virome	2.1	45	94.5	20.07	4.70852	130288774	0	higher
SM1050_MG_virome	NZAHP	DNA Virome	3.35	45	150.75	20	7.5375	114515514	0	intermediate
SM1000_MT	NZANU	RNA Bulk	21.2	25	530	1.09	486.239	85779320	10	intermediate
SM1001_MT	OBNPY	RNA Bulk	8.94	25	223.5	1.085	205.991	80828796	12	lower
SM1002_MT	NZANW	RNA Bulk	15	25	375	1.08	347.222	152689702	13	lower
SM1003_MT	NZANX	RNA Bulk	20	25	500	1.095	456.621	164793510	9	intermediate
SM1004_MT	NZANY	RNA Bulk	19.4	25	485	1.1	440.909	200390884	7	higher
SM1005_MT	NZANZ	RNA Bulk	34	25	850	1.08	787.037	134865270	25	higher
SM1026_MT	NZANG	RNA Bulk	24	50	1200	1.0465	1146.68	348242474	15	intermediate
SM1027_MT	NZANH	RNA Bulk	13.4	50	670	1.0195	657.185	167469504	8	lower
SM1028_MT	NZANN	RNA Bulk	19.2	50	960	1.0215	939.794	207583026	9	lower
SM1029_MT	NZANO	RNA Bulk	22.4	50	1120	1.0275	1090.02	229302222	8	lower
SM1030_MT	NZANP	RNA Bulk	17.4	50	870	1.013	858.835	105646138	8	intermediate
SM1031_MT	NZANS	RNA Bulk	26.8	50	1340	1.026	1306.04	96249124	10	higher
SM1050_MT	NZANT	RNA Bulk	24.8	50	1240	1.0245	1210.35	136338218	11	intermediate
SM1000_MT_polyA	NZGYB	RNA PolyA	21.2	25	530	1.09	486.239	128293036	12	intermediate
SM1001_MT_polyA	OHHCA	RNA PolyA	8.94	25	223.5	1.085	205.991	261676808	8	lower
SM1002_MT_polyA	NZGYC	RNA PolyA	15	25	375	1.08	347.222	101474852	10	lower
SM1003_MT_polyA	NZGYG	RNA PolyA	20	25	500	1.095	456.621	151456298	5	intermediate
SM1004_MT_polyA	NZGYH	RNA PolyA	19.4	25	485	1.1	440.909	135653972	7	higher
SM1005_MT_polyA	NZGYN	RNA PolyA	34	25	850	1.08	787.037	113613290	19	higher
SM1026_MT_polyA	NZGXT	RNA PolyA	24	50	1200	1.0465	1146.68	243449400	10	intermediate
SM1027_MT_polyA	NZGXU	RNA PolyA	13.4	50	670	1.0195	657.185	232810580	9	lower
SM1028_MT_polyA	NZGXW	RNA PolyA	19.2	50	960	1.0215	939.794	240674564	10	lower
SM1029_MT_polyA	NZGXX	RNA PolyA	22.4	50	1120	1.0275	1090.02	195230500	10	lower
SM1030_MT_polyA	NZGXY	RNA PolyA	17.4	50	870	1.013	858.835	232761364	10	intermediate
SM1031_MT_polyA	NZGXZ	RNA PolyA	26.8	50	1340	1.026	1306.04	84244082	7	higher
SM1050_MT_polyA	NZGYA	RNA PolyA	24.8	50	1240	1.0245	1210.35	76410988	7	intermediate
SM1000_MT_virome	NZACW	RNA Virome	0.584	40	23.36	20.81	1.12254	7354410	87	intermediate
SM1001_MT_virome	NZACX	RNA Virome	OOR	25	NA	20.13	NA	4917658	84	lower
SM1002_MT_virome	NZACY	RNA Virome	0.946	40	37.84	20.13	1.87978	5344312	91	lower
SM1003_MT_virome	NZACZ	RNA Virome	0.428	40	17.12	20.9	0.819139	7969126	81	intermediate
SM1004_MT_virome	NZAGA	RNA Virome	0.44	40	17.6	20.17	0.872583	13385118	87	higher
SM1005_MT_virome	NZAGB	RNA Virome	0.42	40	16.8	20.68	0.812379	14181804	87	higher
SM1026_MT_virome	NZAGC	RNA Virome	1.83	120	219.6	20.03	10.9636	7854524	92	intermediate
SM1027_MT_virome	NZAGG	RNA Virome	0.968	120	116.16	20.08	5.78486	7497370	91	lower
SM1028_MT_virome	NZAGH	RNA Virome	1.39	120	166.8	20	8.34	6811058	93	lower
SM1029_MT_virome	NZAGN	RNA Virome	2.7	120	324	20.04	16.1677	6948128	91	lower
SM1030_MT_virome	NZAGO	RNA Virome	1.44	120	172.8	20.02	8.63137	17293458	89	intermediate
SM1031_MT_virome	NZAGP	RNA Virome	4.18	120	501.6	20.07	24.9925	12008934	91	higher
SM1050_MT_virome	NZAGS	RNA Virome	3.88	120	465.6	20	23.28	11407810	91	intermediate

## Sheet: read_mapping_stats
sample	Type	ReadsMapped	ReadsUsed	ReadsNormalized	sample_moisture		extractiontype	sum_reads	bps	gbp	flooredgbp
SM1000	Bacterial	589734	440165978	0.0013398	intermediate		Bacterial	3238849252	489066237052	489.066	489
SM1002	Bacterial	220442	354644416	0.000621586	lower		EukFloat	5239805976	791210702376	791.211	791
SM1004	Bacterial	530310	258354536	0.00205264	higher		DNA Virome	1464692248	221168529448	221.169	221
SM1005	Bacterial	1586345	544537504	0.0029132	higher		RNA Virome	122973710	18569030210	18.569	18
SM1028	Bacterial	116460	334661778	0.000347993	lower		Bulk MetaT	2110178188	318636906388	318.637	318
SM1030	Bacterial	1134184	417285900	0.002718	intermediate		PolyA	2197749734	331860209834	331.86	331
SM1031	Bacterial	2585078	435021030	0.00594242	higher
SM1050	Bacterial	337419	454178110	0.000742922	intermediate
SM1000	EukFloat	2570641	322284056	0.00797632	intermediate
SM1001	EukFloat	2807384	449608964	0.00624406	lower
SM1002	EukFloat	3030804	415176654	0.00730003	lower
SM1003	EukFloat	2836505	427614766	0.00663332	intermediate
SM1004	EukFloat	3728636	430040342	0.00867043	higher
SM1005	EukFloat	5709695	355302386	0.01607	higher
SM1026	EukFloat	1125721	340442088	0.00330664	intermediate
SM1027	EukFloat	1340897	312583086	0.00428973	lower
SM1028	EukFloat	1663198	421745204	0.00394361	lower
SM1029	EukFloat	1672043	342464784	0.00488238	lower
SM1030	EukFloat	3336121	445445244	0.00748941	intermediate
SM1031	EukFloat	2383466	427658846	0.00557329	higher
SM1050	EukFloat	3178666	549439556	0.00578529	intermediate
SM1000	DNA Virome	40081457	119172626	0.336331	intermediate
SM1001	DNA Virome	1620921	66503964	0.0243733	lower
SM1002	DNA Virome	4565958	92208462	0.0495178	lower
SM1003	DNA Virome	12241969	111410088	0.109882	intermediate
SM1004	DNA Virome	28337654	122496514	0.231334	higher
SM1005	DNA Virome	38401454	123729984	0.310365	higher
SM1026	DNA Virome	9642858	98573304	0.0978242	intermediate
SM1027	DNA Virome	6618062	118493438	0.0558517	lower
SM1028	DNA Virome	16196719	158439672	0.102226	lower
SM1029	DNA Virome	7314146	118930906	0.0614991	lower
SM1030	DNA Virome	10403513	89929002	0.115686	intermediate
SM1031	DNA Virome	37634056	130288774	0.288851	higher
SM1050	DNA Virome	39015794	114515514	0.340703	intermediate
SM1000	RNA Virome	590746	7354410	0.0803254	intermediate
SM1001	RNA Virome	88977	4917658	0.0180934	lower
SM1002	RNA Virome	925769	5344312	0.173225	lower
SM1003	RNA Virome	1853654	7969126	0.232604	intermediate
SM1004	RNA Virome	1958233	13385118	0.146299	higher
SM1005	RNA Virome	4177852	14181804	0.294592	higher
SM1026	RNA Virome	1397424	7854524	0.177913	intermediate
SM1027	RNA Virome	518912	7497370	0.0692125	lower
SM1028	RNA Virome	363904	6811058	0.0534284	lower
SM1029	RNA Virome	580314	6948128	0.0835209	lower
SM1030	RNA Virome	5422776	17293458	0.313574	intermediate
SM1031	RNA Virome	3193428	12008934	0.265921	higher
SM1050	RNA Virome	1933896	11407810	0.169524	intermediate
SM1000	BulkMetaT	2850020	85779320	0.033225	intermediate
SM1001	BulkMetaT	1122070	80828796	0.0138821	lower
SM1002	BulkMetaT	3181154	152689702	0.0208341	lower
SM1003	BulkMetaT	8889534	164793510	0.0539435	intermediate
SM1004	BulkMetaT	11030269	200390884	0.0550438	higher
SM1005	BulkMetaT	6424343	134865270	0.0476353	higher
SM1026	BulkMetaT	5966275	348242474	0.0171325	intermediate
SM1027	BulkMetaT	1465563	167469504	0.00875122	lower
SM1028	BulkMetaT	2553007	207583026	0.0122987	lower
SM1029	BulkMetaT	3450762	229302222	0.015049	lower
SM1030	BulkMetaT	6334719	105646138	0.0599617	intermediate
SM1031	BulkMetaT	2866774	96249124	0.0297849	higher
SM1050	BulkMetaT	4065508	136338218	0.0298193	intermediate
SM1000	PolyA	5554903	128293036	0.0432986	intermediate
SM1001	PolyA	1081358	261676808	0.00413242	lower
SM1002	PolyA	3914517	101474852	0.0385762	lower
SM1003	PolyA	15065998	151456298	0.0994742	intermediate
SM1004	PolyA	8256811	135653972	0.0608667	higher
SM1005	PolyA	1095386	113613290	0.00964135	higher
SM1026	PolyA	3199673	243449400	0.0131431	intermediate
SM1027	PolyA	2184142	232810580	0.00938163	lower
SM1028	PolyA	1251201	240674564	0.00519873	lower
SM1029	PolyA	3438043	195230500	0.0176102	lower
SM1030	PolyA	19381799	232761364	0.083269	intermediate
SM1031	PolyA	1691940	84244082	0.0200838	higher
SM1050	PolyA	2461864	76410988	0.0322187	intermediate

## Sheet: JGI_metadata
fd_project_name	sp_project_id	sp_project_name	lib_name	lib_actual_queue	sam_name	sp_actual_product	analysis_project_name	data_type
SM1000_MG_bacterial	1441077	SM1000_MG_bacterial	NYYOH	Illumina Regular Fragment, 400bp, Plates	SM1000_MG_bacterial_T4	Metagenome Standard Draft	SM1000_MG_bacterial	bacterial DNA
SM1002_MG_bacterial	1441079	SM1002_MG_bacterial	NYYOO	Illumina Regular Fragment, 400bp, Plates	SM1002_MG_bacterial_T4	Metagenome Standard Draft	SM1002_MG_bacterial	bacterial DNA
SM1004_MG_bacterial	1441081	SM1004_MG_bacterial	NYYOS	Illumina Regular Fragment, 400bp, Plates	SM1004_MG_bacterial_T1	Metagenome Standard Draft	SM1004_MG_bacterial	bacterial DNA
SM1005_MG_bacterial	1441082	SM1005_MG_bacterial	NYYOT	Illumina Regular Fragment, 400bp, Plates	SM1005_MG_bacterial_T4	Metagenome Standard Draft	SM1005_MG_bacterial	bacterial DNA
SM1028_MG_bacterial	1441091	SM1028_MG_bacterial	NYYPG	Illumina Regular Fragment, 400bp, Plates	SM1028_MG_bacterial_T4	Metagenome Standard Draft	SM1028_MG_bacterial	bacterial DNA
SM1030_MG_bacterial	1441093	SM1030_MG_bacterial	NYYPN	Illumina Regular Fragment, 400bp, Plates	SM1030_MG_bacterial_T1	Metagenome Standard Draft	SM1030_MG_bacterial	bacterial DNA
SM1031_MG_bacterial	1441094	SM1031_MG_bacterial	NYYPO	Illumina Regular Fragment, 400bp, Plates	SM1031_MG_bacterial_T4	Metagenome Standard Draft	SM1031_MG_bacterial	bacterial DNA
SM1050_MG_bacterial	1441095	SM1050_MG_bacterial	NYYPP	Illumina Regular Fragment, 400bp, Plates	SM1050_MG_bacterial_T1	Metagenome Standard Draft	SM1050_MG_bacterial	bacterial DNA
SM1005_MT	1440986	SM1005_MT	NZANZ	Illumina Low Input RNASeq w/rRNA Depletion, Tubes	SM1005_MT_T4_MT_PolyA_Dep	Metagenome Metatranscriptome	SM1005_MT (2)	bulk RNA
SM1004_MT	1440987	SM1004_MT	NZANY	Illumina Low Input RNASeq w/rRNA Depletion, Tubes	SM1004_MT_T1_MT_PolyA_Dep	Metagenome Metatranscriptome	SM1004_MT (2)	bulk RNA
SM1003_MT	1440988	SM1003_MT	NZANX	Illumina Low Input RNASeq w/rRNA Depletion, Tubes	SM1003_MT_T1_MT_PolyA_Dep	Metagenome Metatranscriptome	SM1003_MT (2)	bulk RNA
SM1002_MT	1440989	SM1002_MT	NZANW	Illumina Low Input RNASeq w/rRNA Depletion, Tubes	SM1002_MT_T4_MT_PolyA_Dep	Metagenome Metatranscriptome	SM1002_MT (2)	bulk RNA
SM1001_MT	1440990	SM1001_MT	OBNPY	Illumina Low Input RNASeq w/rRNA Depletion, Tubes	SM1001_MT_2	Metagenome Metatranscriptome	SM1001_MT (2)	bulk RNA
SM1000_MT	1440991	SM1000_MT	NZANU	Illumina Low Input RNASeq w/rRNA Depletion, Tubes	SM1000_MT_T4_MT_PolyA_Dep	Metagenome Metatranscriptome	SM1000_MT (2)	bulk RNA
SM1050_MT	1441011	SM1050_MT	NZANT	Illumina Low Input RNASeq w/rRNA Depletion, Tubes	SM1050_MT_T1_MT_PolyA_Dep	Metagenome Metatranscriptome	SM1050_MT (2)	bulk RNA
SM1031_MT	1441012	SM1031_MT	NZANS	Illumina Low Input RNASeq w/rRNA Depletion, Tubes	SM1031_MT_T4_MT_PolyA_Dep	Metagenome Metatranscriptome	SM1031_MT (2)	bulk RNA
SM1030_MT	1441013	SM1030_MT	NZANP	Illumina Low Input RNASeq w/rRNA Depletion, Tubes	SM1030_MT_T1_MT_PolyA_Dep	Metagenome Metatranscriptome	SM1030_MT (2)	bulk RNA
SM1029_MT	1441014	SM1029_MT	NZANO	Illumina Low Input RNASeq w/rRNA Depletion, Tubes	SM1029_MT_T1_MT_PolyA_Dep	Metagenome Metatranscriptome	SM1029_MT (2)	bulk RNA
SM1028_MT	1441015	SM1028_MT	NZANN	Illumina Low Input RNASeq w/rRNA Depletion, Tubes	SM1028_MT_T4_MT_PolyA_Dep	Metagenome Metatranscriptome	SM1028_MT (2)	bulk RNA
SM1027_MT	1441016	SM1027_MT	NZANH	Illumina Low Input RNASeq w/rRNA Depletion, Tubes	SM1027_MT_T4_MT_PolyA_Dep	Metagenome Metatranscriptome	SM1027_MT (2)	bulk RNA
SM1026_MT	1441017	SM1026_MT	NZANG	Illumina Low Input RNASeq w/rRNA Depletion, Tubes	SM1026_MT_T1_MT_PolyA_Dep	Metagenome Metatranscriptome	SM1026_MT (2)	bulk RNA
SM1000_MG_fungal	1441083	SM1000_MG_fungal	NYYOU	Illumina Regular Fragment, 400bp, Plates	SM1000_MG_fungal_T4	Metagenome Standard Draft	SM1000_MG_fungal	fungal DNA
SM1001_MG_fungal	1441084	SM1001_MG_fungal	NYYOW	Illumina Regular Fragment, 400bp, Plates	SM1001_MG_fungal_T1	Metagenome Standard Draft	SM1001_MG_fungal	fungal DNA
SM1002_MG_fungal	1441085	SM1002_MG_fungal	NYYOX	Illumina Regular Fragment, 400bp, Plates	SM1002_MG_fungal_T4	Metagenome Standard Draft	SM1002_MG_fungal	fungal DNA
SM1003_MG_fungal	1441086	SM1003_MG_fungal	NYYOY	Illumina Regular Fragment, 400bp, Plates	SM1003_MG_fungal_T1	Metagenome Standard Draft	SM1003_MG_fungal	fungal DNA
SM1004_MG_fungal	1441087	SM1004_MG_fungal	NYYOZ	Illumina Regular Fragment, 400bp, Plates	SM1004_MG_fungal_T1	Metagenome Standard Draft	SM1004_MG_fungal	fungal DNA
SM1005_MG_fungal	1441088	SM1005_MG_fungal	NYYPA	Illumina Regular Fragment, 400bp, Plates	SM1005_MG_fungal_T4	Metagenome Standard Draft	SM1005_MG_fungal	fungal DNA
SM1026_MG_fungal	1441096	SM1026_MG_fungal	NYYPS	Illumina Regular Fragment, 400bp, Plates	SM1026_MG_fungal_T1	Metagenome Standard Draft	SM1026_MG_fungal	fungal DNA
SM1027_MG_fungal	1441097	SM1027_MG_fungal	NYYPT	Illumina Regular Fragment, 400bp, Plates	SM1027_MG_fungal_T4	Metagenome Standard Draft	SM1027_MG_fungal	fungal DNA
SM1028_MG_fungal	1441098	SM1028_MG_fungal	NYYPU	Illumina Regular Fragment, 400bp, Plates	SM1028_MG_fungal_T4	Metagenome Standard Draft	SM1028_MG_fungal	fungal DNA
SM1029_MG_fungal	1441099	SM1029_MG_fungal	NYYPW	Illumina Regular Fragment, 400bp, Plates	SM1029_MG_fungal_T1	Metagenome Standard Draft	SM1029_MG_fungal	fungal DNA
SM1030_MG_fungal	1441100	SM1030_MG_fungal	NYYPX	Illumina Regular Fragment, 400bp, Plates	SM1030_MG_fungal_T1	Metagenome Standard Draft	SM1030_MG_fungal	fungal DNA
SM1031_MG_fungal	1441101	SM1031_MG_fungal	NYYPY	Illumina Regular Fragment, 400bp, Plates	SM1031_MG_fungal_T4	Metagenome Standard Draft	SM1031_MG_fungal	fungal DNA
SM1050_MG_fungal	1441102	SM1050_MG_fungal	NYYPZ	Illumina Regular Fragment, 400bp, Plates	SM1050_MG_fungal_T1	Metagenome Standard Draft	SM1050_MG_fungal	fungal DNA
SM1005_MT	1440986	SM1005_MT	NZGYN	Illumina Low Input RNASeq w/PolyA Selection, Tubes	SM1005_MT_T4_MT_PolyA_Dep	Metagenome Metatranscriptome	SM1005_MT (2)	polyA RNA
SM1004_MT	1440987	SM1004_MT	NZGYH	Illumina Low Input RNASeq w/PolyA Selection, Tubes	SM1004_MT_T1_MT_PolyA_Dep	Metagenome Metatranscriptome	SM1004_MT (2)	polyA RNA
SM1003_MT	1440988	SM1003_MT	NZGYG	Illumina Low Input RNASeq w/PolyA Selection, Tubes	SM1003_MT_T1_MT_PolyA_Dep	Metagenome Metatranscriptome	SM1003_MT (2)	polyA RNA
SM1002_MT	1440989	SM1002_MT	NZGYC	Illumina Low Input RNASeq w/PolyA Selection, Tubes	SM1002_MT_T4_MT_PolyA_Dep	Metagenome Metatranscriptome	SM1002_MT (2)	polyA RNA
SM1001_MT	1440990	SM1001_MT	OAHUH	Illumina Low Input RNASeq w/PolyA Selection, Tubes	SM1001_MT_2	Metagenome Metatranscriptome	SM1001_MT (2)	polyA RNA
SM1000_MT	1440991	SM1000_MT	NZGYB	Illumina Low Input RNASeq w/PolyA Selection, Tubes	SM1000_MT_T4_MT_PolyA_Dep	Metagenome Metatranscriptome	SM1000_MT (2)	polyA RNA
SM1050_MT	1441011	SM1050_MT	NZGYA	Illumina Low Input RNASeq w/PolyA Selection, Tubes	SM1050_MT_T1_MT_PolyA_Dep	Metagenome Metatranscriptome	SM1050_MT (2)	polyA RNA
SM1031_MT	1441012	SM1031_MT	NZGXZ	Illumina Low Input RNASeq w/PolyA Selection, Tubes	SM1031_MT_T4_MT_PolyA_Dep	Metagenome Metatranscriptome	SM1031_MT (2)	polyA RNA
SM1030_MT	1441013	SM1030_MT	NZGXY	Illumina Low Input RNASeq w/PolyA Selection, Tubes	SM1030_MT_T1_MT_PolyA_Dep	Metagenome Metatranscriptome	SM1030_MT (2)	polyA RNA
SM1029_MT	1441014	SM1029_MT	NZGXX	Illumina Low Input RNASeq w/PolyA Selection, Tubes	SM1029_MT_T1_MT_PolyA_Dep	Metagenome Metatranscriptome	SM1029_MT (2)	polyA RNA
SM1028_MT	1441015	SM1028_MT	NZGXW	Illumina Low Input RNASeq w/PolyA Selection, Tubes	SM1028_MT_T4_MT_PolyA_Dep	Metagenome Metatranscriptome	SM1028_MT (2)	polyA RNA
SM1027_MT	1441016	SM1027_MT	NZGXU	Illumina Low Input RNASeq w/PolyA Selection, Tubes	SM1027_MT_T4_MT_PolyA_Dep	Metagenome Metatranscriptome	SM1027_MT (2)	polyA RNA
SM1026_MT	1441017	SM1026_MT	NZGXT	Illumina Low Input RNASeq w/PolyA Selection, Tubes	SM1026_MT_T1_MT_PolyA_Dep	Metagenome Metatranscriptome	SM1026_MT (2)	polyA RNA
SM1000_MG_virome	1441129	SM1000_MG_virome	NZAGU	Illumina ss/dsDNA-Seq, Tubes	SM1000_MG_virome_T4	Viral Metagenome Minimal Draft	SM1000_MG_virome	virome DNA
SM1001_MG_virome	1441130	SM1001_MG_virome	NZAGW	Illumina ss/dsDNA-Seq, Tubes	SM1001_MG_virome_T1	Viral Metagenome Minimal Draft	SM1001_MG_virome	virome DNA
SM1002_MG_virome	1441131	SM1002_MG_virome	NZAGX	Illumina ss/dsDNA-Seq, Tubes	SM1002_MG_virome_T4	Viral Metagenome Minimal Draft	SM1002_MG_virome	virome DNA
SM1003_MG_virome	1441132	SM1003_MG_virome	NZAGY	Illumina ss/dsDNA-Seq, Tubes	SM1003_MG_virome_T1	Viral Metagenome Minimal Draft	SM1003_MG_virome	virome DNA
SM1004_MG_virome	1441133	SM1004_MG_virome	NZAGZ	Illumina ss/dsDNA-Seq, Tubes	SM1004_MG_virome_T1	Viral Metagenome Minimal Draft	SM1004_MG_virome	virome DNA
SM1005_MG_virome	1441134	SM1005_MG_virome	NZAHA	Illumina ss/dsDNA-Seq, Tubes	SM1005_MG_virome_T4	Viral Metagenome Minimal Draft	SM1005_MG_virome	virome DNA
SM1026_MG_virome	1441135	SM1026_MG_virome	NZAHB	Illumina ss/dsDNA-Seq, Tubes	SM1026_MG_virome_T1	Viral Metagenome Minimal Draft	SM1026_MG_virome	virome DNA
SM1027_MG_virome	1441136	SM1027_MG_virome	NZAHC	Illumina ss/dsDNA-Seq, Tubes	SM1027_MG_virome_T4	Viral Metagenome Minimal Draft	SM1027_MG_virome	virome DNA
SM1028_MG_virome	1441137	SM1028_MG_virome	NZAHG	Illumina ss/dsDNA-Seq, Tubes	SM1028_MG_virome_T4	Viral Metagenome Minimal Draft	SM1028_MG_virome	virome DNA
SM1029_MG_virome	1441138	SM1029_MG_virome	NZAHH	Illumina ss/dsDNA-Seq, Tubes	SM1029_MG_virome_T1	Viral Metagenome Minimal Draft	SM1029_MG_virome	virome DNA
SM1030_MG_virome	1441139	SM1030_MG_virome	NZAHN	Illumina ss/dsDNA-Seq, Tubes	SM1030_MG_virome_T1	Viral Metagenome Minimal Draft	SM1030_MG_virome	virome DNA
SM1031_MG_virome	1441140	SM1031_MG_virome	NZAHO	Illumina ss/dsDNA-Seq, Tubes	SM1031_MG_virome_T4	Viral Metagenome Minimal Draft	SM1031_MG_virome	virome DNA
SM1050_MG_virome	1441141	SM1050_MG_virome	NZAHP	Illumina ss/dsDNA-Seq, Tubes	SM1050_MG_virome_T1	Viral Metagenome Minimal Draft	SM1050_MG_virome	virome DNA
SM1050_MT_virome	1440998	SM1050_MT_virome	NZAGS	Illumina, Tubes	SM1050_MT_virome_T1	Viral Metatranscriptome	SM1050_MT_virome	virome RNA
SM1031_MT_virome	1440999	SM1031_MT_virome	NZAGP	Illumina, Tubes	SM1031_MT_virome_T4	Viral Metatranscriptome	SM1031_MT_virome	virome RNA
SM1030_MT_virome	1441000	SM1030_MT_virome	NZAGO	Illumina, Tubes	SM1030_MT_virome_T1	Viral Metatranscriptome	SM1030_MT_virome	virome RNA
SM1029_MT_virome	1441001	SM1029_MT_virome	NZAGN	Illumina, Tubes	SM1029_MT_virome_T1	Viral Metatranscriptome	SM1029_MT_virome	virome RNA
SM1028_MT_virome	1441002	SM1028_MT_virome	NZAGH	Illumina, Tubes	SM1028_MT_virome_T4	Viral Metatranscriptome	SM1028_MT_virome	virome RNA
SM1027_MT_virome	1441003	SM1027_MT_virome	NZAGG	Illumina, Tubes	SM1027_MT_virome_T4	Viral Metatranscriptome	SM1027_MT_virome	virome RNA
SM1026_MT_virome	1441004	SM1026_MT_virome	NZAGC	Illumina, Tubes	SM1026_MT_virome_T1	Viral Metatranscriptome	SM1026_MT_virome	virome RNA
SM1005_MT_virome	1441005	SM1005_MT_virome	NZAGB	Illumina, Tubes	SM1005_MT_virome_T4	Viral Metatranscriptome	SM1005_MT_virome	virome RNA
SM1004_MT_virome	1441006	SM1004_MT_virome	NZAGA	Illumina, Tubes	SM1004_MT_virome_T1	Viral Metatranscriptome	SM1004_MT_virome	virome RNA
SM1003_MT_virome	1441007	SM1003_MT_virome	NZACZ	Illumina, Tubes	SM1003_MT_virome_T1	Viral Metatranscriptome	SM1003_MT_virome	virome RNA
SM1002_MT_virome	1441008	SM1002_MT_virome	NZACY	Illumina, Tubes	SM1002_MT_virome_T4	Viral Metatranscriptome	SM1002_MT_virome	virome RNA
SM1001_MT_virome	1441009	SM1001_MT_virome	NZACX	Illumina, Tubes	SM1001_MT_virome_T1	Viral Metatranscriptome	SM1001_MT_virome	virome RNA
SM1000_MT_virome	1441010	SM1000_MT_virome	NZACW	Illumina, Tubes	SM1000_MT_virome_T4	Viral Metatranscriptome	SM1000_MT_virome	virome RNA

## Sheet: Biogeochemistry
Sample	SM1000	SM1001	SM1002	SM1003	SM1004	SM1005	SM1026	SM1027	SM1028	SM1029	SM1030	SM1031	SM1050
MBC	1661.7	654.12	1029.15	925.646	982.35	1439.98	2056.7	827	1231	1438.98	1176.68	2287.66	1345.49
MBC_norm	220.244	92.7042	145.439	132.799	144.467	213.242	301.993	116.096	173.382	205.503	171.688	342.636	194.009
MBN	197.161	167.123	107.619	91.8444	119.095	191.358	262.238	93.2215	135.524	167.317	153.285	304.089	133.783
MBN_norm	26.132	23.6853	15.2086	13.1766	17.5145	28.3376	38.5055	13.0866	19.0881	23.8946	22.3656	45.5452	19.2904
TOC	319.876	54.0602	329.632	234.327	350.714	537.71	781.201	316.293	886.71	401.324	214.841	738.632	4576.04
Extractable_DOC	42.3967	7.6616	46.5835	33.6179	51.5768	79.6277	114.707	44.4019	124.89	57.3135	31.3471	110.629	659.829
TN	61.1295	34.0159	113.528	32.181	78.2087	67.4943	85.7569	36.5478	51.5818	73.5274	35.0253	86.2803	46.6054
Extractable_TN	8.10217	4.82086	16.0438	4.61689	11.5016	9.99501	12.5921	5.13066	7.26513	10.5005	5.1105	12.9227	6.72013
InorganicPhosphate	10.659	12.1776	4.20218	13.0111	13.2086	26.766	13.4641	0.165255	8.12631	8.52056	13.3545	24.4623	23.1393
PercentWater	0.1494	0.1202	0.1264	0.1437	0.1553	0.1601	0.1487	0.1129	0.1114	0.1269	0.1465	0.1675	0.1331
